# Supplementary material for: Morphometric and Genetic Description of Trophic Adaptations in Cichlid Fishes
Source: Biology (Basel). 2022 Aug 3;11(8):1165. doi: 10.3390/biology11081165 (PMC9405370; doi:10.3390/biology11081165)
Supplement: Supplementary file 1 [file biology-11-01165-s001.zip]

Archive with 6 entries (6 files):
- DeLorenzo Table S1 ANOVA Tukey.xlsx
- DeLorenzo Table S2 correlations.xlsx
- DeLorenzo Table S3 QTL info_revised.xlsx
- DeLorenzo Table S4 Candidate genes_revised.xlsx
- DeLorenzo Table S5 GO analysis_revised.xlsx
- DeLorenzo_LcLtHeadQTL_Supporting_revision_proof.pdf
