# Supplementary material for: Morphometric and Genetic Description of Trophic Adaptations in Cichlid Fishes
Source: Biology (Basel). 2022 Aug 3;11(8):1165. doi: 10.3390/biology11081165 (PMC9405370; doi:10.3390/biology11081165)
Supplement: Supplementary file 1 [file biology-11-01165-s001.zip › DeLorenzo Table S1 ANOVA Tukey.xlsx]

## Sheet: ANOVA + Tukey HSD
	Residual measure ~ Group, followed by Tukeys HSD
		Labidochromis	Labidochromis	Labeotropheus
	p-value	and Labeotropheus	and F2 hybrids	and F2 hybrids
Head length/ standard length	<2e-16	<1e-7	<1e-7	<1e-7
Dorsal fin to pelvic Fin	2.47e-10	<1e-7	1e-07	0.0005928
Pelvic fin to snout	5.22e-07	2.2e-06	1.5e-06	0.154849
Preorbital length	7.98e-07	0.0177765	9e-07	0.280681
Eye area	5.55e-15	<1e-7	6.8e-06	<1e-7
Mouth angle	1.68e-11	<1e-7	2.29e-05	2e-07
PC1 lateral	<2e-16	<1e-7	0.359561	<1e-7
PC2 lateral	0.0168	0.070984	0.95258	0.0126782
PC3 lateral	0.000303	0.988734	0.0179862	0.0064791
PC4 lateral	0.00268	0.774457	0.0123491	0.108798
PC5 lateral	<2e-16	0.0116851	<1e-7	<1e-7
Mandible width	1.17e-09	<1e-7	7.1e-06	4.42e-05
Mandible length	6.51e-08	4e-07	0.0747795	4e-07
Opercle to midline width	0.676	0.930176	0.949065	0.679103
Opercle to mandible length	2.42e-14	<1e-7	<1e-7	1.97e-05
Mandible angle	<2e-16	<1e-7	<1e-7	<1e-7
PC1 ventral	<2e-16	<1e-7	<1e-7	<1e-7
PC2 ventral	5.33e-09	8.22e-05	0.956895	<1e-7
PC3 ventral	3.52e-08	0.310734	1.5e-06	0.0031539
