# Supplementary material for: Morphometric and Genetic Description of Trophic Adaptations in Cichlid Fishes
Source: Biology (Basel). 2022 Aug 3;11(8):1165. doi: 10.3390/biology11081165 (PMC9405370; doi:10.3390/biology11081165)
Supplement: Supplementary file 1 [file biology-11-01165-s001.zip › DeLorenzo Table S2 correlations.xlsx]

## Sheet: Table S2 correlations
	Standard length	Head length/ standard length	Dorsal fin to pelvic Fin	Pelvic fin to snout	Preorbital length	Eye area	Mouth angle	PC1 lateral	PC2 lateral	PC3 lateral	PC4 lateral	PC5 lateral	Mandible width	Mandible length	Opercle to midline width	Opercle to mandible length	Mandible angle	PC1 ventral	PC2 ventral	PC3 ventral
Standard length		-0.506285	0.939909	0.937357	0.816852	0.719939	0.282941	0.0352058	-0.031645	0.0128242	-0.00546245	0.0329759	0.718189	0.597873	0.68501	0.701314	0.293877	0.0986852	0.0559795	0.0392588
Head length/ standard length			0.223807	0.207857	0.208448	0.00919456	-0.0105527	0.204059	0.00928207	-0.00198869	-0.0891376	-0.0316222	-0.111671	-0.155743	-0.0825984	-0.13095	-0.0328265	0.0965544	0.00142938	-0.0317171
Dorsal fin to pelvic Fin				0.367739	0.0606162	0.191112	0.0248812	0.122505	-0.0783479	-0.64632	0.0863605	-0.0563739	0.24611	0.0197263	0.274959	0.00942233	0.22343	-0.145634	0.0183033	-0.147186
Pelvic fin to snout					0.354347	0.042572	-0.147101	-0.135762	0.208629	0.177998	0.115297	-0.079618	0.110787	0.0443042	0.0747403	0.0590288	0.0660211	-0.019298	-0.00296694	0.0479333
Preorbital length						-0.133867	0.0858712	0.0821201	0.360013	0.072063	-0.349357	-0.023632	0.116125	0.0356015	0.0691137	0.0806778	0.0874559	-0.0249817	-0.0573538	-0.0138198
Eye area							-0.0983903	0.119926	-0.000602193	-0.126373	-0.0470824	-0.0844004	0.0537425	0.0692086	0.0739659	0.039178	-0.0316816	0.0134718	0.144592	-0.0223678
Mouth angle								-0.303257	-0.0146438	-0.189566	-0.341995	0.42246	0.0545897	0.0385942	0.0489787	0.00625263	0.0735162	0.0315123	-0.0606398	-0.0913345
PC1 lateral									0.0720294	-0.0709025	-0.065082	-0.172269	-0.0289601	-0.037312	0.00554375	-0.0436076	0.00431408	0.00329515	0.0600479	0.00954024
PC2 lateral										0.0429345	-0.00696253	0.0415883	0.149591	0.0927262	-0.0139218	0.124209	0.101781	0.00147469	-0.0798878	0.123992
PC3 lateral											-0.0223457	-0.108368	-0.205173	-0.0484735	-0.187185	-0.0393901	-0.155954	0.15552	-0.0245364	0.114797
PC4 lateral												-0.0772924	0.0666008	0.0399772	-0.0111022	0.0203283	-0.0372449	-0.0884422	0.0708407	0.139862
PC5 lateral													0.0048297	0.0345475	-0.0398765	-0.0287889	-0.00787251	0.0749959	-0.0478398	0.0787479
Mandible width														0.573792	0.778382	0.635166	0.468674	-0.351425	-0.0308106	-0.0427738
Mandible length															0.438354	0.568908	-0.197469	-0.137242	0.159325	0.200436
Opercle to midline width																0.617215	0.324785	-0.287445	0.0594287	-0.170344
Opercle to mandible length																	0.113768	-0.132404	0.0617607	0.0448091
Mandible angle																		-0.267849	-0.299055	-0.286567
PC1 ventral																			-0.197046	0.0933858
PC2 ventral																				-0.0645066
PC3 ventral
