# Supplementary material for: Morphometric and Genetic Description of Trophic Adaptations in Cichlid Fishes
Source: Biology (Basel). 2022 Aug 3;11(8):1165. doi: 10.3390/biology11081165 (PMC9405370; doi:10.3390/biology11081165)
Supplement: Supplementary file 1 [file biology-11-01165-s001.zip › DeLorenzo Table S3 QTL info_revised.xlsx]

## Sheet: QTL
		peak marker information				95% confidence interval						5% LOD	10% LOD
QTL	LG	cM	marker #	marker name		lower marker name	lower cM	upper marker name	upper cM	LOD	PVE	significance	significance	Model cofactors (marker #)	AA mean	AB mean	BB mean	AA standard error	AB standard error	BB standard error	add	dom	heritability
Head proportion (head length/standard length)	20	5	1031	NC_036799.1_4357341		NC_036799.1_86290	0	NC_036799.1_24975626	49.5508	3.28201	0.0332473	3.44	3.12	1031	0.00510601	0.000488282	-0.000666606	0.000470609	0.000354513	0.000487615	0.00288631	-0.00173142	4.91481e-06
Dorsal fin-pelvic fin length	7	25	345	NC_036786.1_16027992		NC_036786.1_9498816	11.1122	NC_036786.1_20398117	32.4931	4.62796	0.0465603	3.43	3.11	345+1033	0.0176242	7.09809e-05	-0.0234574	0.00165374	0.0013511	0.00179441	0.0205408	0.00298756	0.000213148
Dorsal fin-pelvic fin length	20	10	1033	NC_036799.1_6141754		NC_036799.1_86290	0	NC_036799.1_7628007	13.8765	4.26504	0.0429887	3.43	3.11	345+1033	0.00952351	-0.00382959	-0.00624014	0.00175633	0.00135514	0.00188549	0.00788183	-0.00547127	3.85438e-05
Pelvic fin-snout length	12	50	646	NW_020192322.1_98896		NC_036791.1_13138786	15.3166	NC_036791.1_33910551	58.8469	3.2651	0.0330788	3.43	3.14	95+522+646+1137	-0.0358059	0.00150682	0.00407247	0.00186873	0.00138828	0.00174181	-0.0199392	0.0173736	0.000274171
Preorbital length	7	55	373	NW_020192564.1_139889		NC_036786.1_23969724	37.1104	NC_036786.1_48418700	66.25	3.67165	0.0371203	3.43	3.11	373+876	0.00698333	0.000897688	-0.0199536	0.00104987	0.000708508	0.00112011	0.0134684	0.00738281	0.000104315
Preorbital length	17	5	876	NW_020192791.1_1809		NW_020192791.1_1809	0	NW_020192420.1_355233	7.65283	4.90569	0.0492845	3.43	3.11	373+876	-0.00823959	0.000103195	-0.0020053	0.0012137	0.000735882	0.00106596	-0.00311714	0.00522564	1.1685e-05
Eye area	15	10	774	NC_036794.1_4918665		NC_036794.1_2998111	5.97519	NC_036794.1_7845685	16.3781	3.93264	0.0397059	3.42	3.14	499+774+820	0.000333019	0.00299761	-0.00408766	0.000354631	0.000236477	0.000450118	0.00221034	0.00487493	8.38397e-06
Eye area	16-21	0	820	NC_036795.1_107961		NC_036795.1_107961	0	NC_036795.1_25195503	40.7811	3.42147	0.0346353	3.42	3.14	499+774+820	0.001223	0.00165024	-0.000112871	0.000330022	0.000263833	0.000418845	0.000667934	0.00109518	5.22919e-07
Mouth angle	13	20	673	NC_036792.1_12653206		NC_036792.1_10191934	13.3989	NC_036792.1_18278438	30.4084	5.17428	0.0519116	3.43	3.18	673	-0.20511	0.275815	2.11064	0.126997	0.0826305	0.11039	-1.15788	-0.676952	0.439746
PC1 lateral	no significant or suggestive QTL
PC2 lateral	2	50	101	NC_036781.1_30121559		NC_036781.1_27837082	39.9686	NC_036781.1_30863362	51.9181	5.07323	0.050924	3.52	3.19	101+312+373+527+1157	0.000930484	-0.000997057	0.00468714	0.000770513	0.000530677	0.000779837	-0.00187833	-0.00380587	5.3852e-06
PC2 lateral	6	50	312	NC_036785.1_31282058		NC_036785.1_30225591	46.5319	NC_036785.1_36506495	57.0465	4.1646	0.041998	3.52	3.19	101+312+373+527+1157	-0.0078083	0.00532569	-0.00163477	0.000821564	0.000508805	0.000736608	-0.00308676	0.0100472	2.99998e-05
PC2 lateral	7	55	373	NW_020192564.1_139889		NC_036786.1_38933686	49.1362	NC_036786.1_58495933	77.0927	3.808	0.0384719	3.52	3.19	101+312+373+527+1157	0.00571525	-0.00161216	0.00137983	0.000766412	0.000517616	0.000817688	0.00216771	-0.0051597	9.00504e-06
PC2 lateral	10	30	522	NC_036789.1_19450407		NC_036789.1_17902081	27.5108	NC_036789.1_22671369	36.562	7.03483	0.0699116	3.52	3.19	101+312+373+527+1157	0.0067573	0.00110433	-0.00314175	0.000828768	0.00056439	0.000647735	0.00494952	-0.000703442	1.23725e-05
PC2 lateral	23	35	1157	NC_036801.1_13377456		NC_036801.1_1722903	2.55787	NC_036801.1_15134780	40.2155	3.59209	0.0363308	3.52	3.19	101+312+373+527+1157	0.00322228	-0.00456099	0.0123348	0.000685226	0.000507557	0.000851773	-0.00455627	-0.0123395	4.84436e-05
PC3 lateral	17	5	876	NC_036796.1_2794028		NW_020192791.1_1809	0	NW_020192501.1_43735	10.1531	3.42896	0.0347098	3.45	3.11	138+876+1041+1119	-0.0051255	0.00130678	-1.93704e-05	0.000744827	0.000451944	0.000654163	-0.00255306	0.00387922	7.0211e-06
PC3 lateral	20	20	1041	NC_036799.1_9118419		NC_036799.1_4591612	5.2943	NW_020192402.1_428410	24.3927	3.54048	0.0358182	3.45	3.11	138+876+1041+1119	-0.00423752	-0.00124142	0.00515687	0.000652113	0.000476657	0.000642466	-0.00469719	-0.00170109	1.17551e-05
PC3 lateral	22	45	1119	NC_036800.1_22715376		NC_036800.1_17832078	37.4017	NC_036800.1_25180970	47.8268	3.75007	0.0378979	3.45	3.11	138+876+1041+1119	0.00640946	-0.00196244	-0.00243701	0.000719027	0.000452681	0.000650927	0.00442324	-0.00394866	1.36803e-05
PC4 lateral	12	50	646	NW_020192322.1_98896		NC_036791.1_27323192	46.472	NC_036791.1_33910551	58.8469	4.17674	0.0421178	3.46	3.15	484+646+793+1180	-0.00527226	0.0014495	-0.00574596	0.000634082	0.0004715	0.000591031	0.00023685	0.00695861	1.21335e-05
PC4 lateral	23	57.2	1180	NC_036801.1_40047528		NW_020192450.1_246813	39.696	NC_036801.1_40047528	57.1869	3.23414	0.0327704	3.46	3.15	484+646+793+1180	-0.00562246	-0.00274403	0.00439754	0.000563839	0.000453021	0.000740206	-0.00501	-0.00213157	1.36858e-05
PC5 lateral	no significant or suggestive QTL
Mandible width	no significant or suggestive QTL
Mandible length	no significant or suggestive QTL
Opercle to midline width	6	35	303	NC_036785.1_25159517		NC_036785.1_19285638	22.9933	NC_036785.1_31746174	50.329	3.42869	0.0347071	3.39	3.16	303+764	0.00120387	0.00282627	-0.00953993	0.00134685	0.000841833	0.0010524	0.0053719	0.0069943	2.6658e-05
Opercle to midline width	15	0	764	NW_020192427.1_379897		NW_020192427.1_379897	0	NC_036794.1_5512258	11.5452	3.23301	0.0327592	3.39	3.16	303+764	-0.000482581	-0.00139553	-0.00232321	0.00123715	0.000813566	0.00128591	0.000920315	7.3689e-06	4.23503e-07
Opercle to mandible length	6	35	303	NC_036785.1_25159517		NC_036785.1_17454145	21.1937	NC_036785.1_31746174	50.329	3.89588	0.0386898	3.46	3.2	56+303	-0.0123264	-0.000673651	-0.00965115	0.00182038	0.00113781	0.00142241	-0.0058264	-0.0031511	1.94554e-05
Mandible angle	16-21	10	829	NW_020192406.1_143265		NC_036795.1_107961	0	NC_036795.1_16053344	21.8496	3.35221	0.0339242	3.56	3.2	669+719+829	2.47331	-2.11358	-1.48317	0.239237	0.145902	0.247053	1.97824	-2.60865	0.785315
PC1 ventral	no significant or suggestive QTL
PC2 ventral	no significant or suggestive QTL
PC3 ventral	no significant or suggestive QTL
