# Supplementary material for: Morphometric and Genetic Description of Trophic Adaptations in Cichlid Fishes
Source: Biology (Basel). 2022 Aug 3;11(8):1165. doi: 10.3390/biology11081165 (PMC9405370; doi:10.3390/biology11081165)
Supplement: Supplementary file 1 [file biology-11-01165-s001.zip › DeLorenzo Table S4 Candidate genes_revised.xlsx]

## Sheet: HeadProportion LG20 NC_036799.1
NC_036799.1:86290-24975626
NCBI Gene symbol	NCBI Gene ID	DAVID Gene Name	Chromosome #	START	STOP
LOC101463606	101463606	L-rhamnose-binding lectin SML(LOC101463606)	20	23374483	23377691
LOC101463612	101463612	Rho guanine nucleotide exchange factor (GEF) 19(arhgef19)	20	9915336	9932749
dnajc16	101463650	DnaJ heat shock protein family (Hsp40) member C16(dnajc16)	20	8750042	8756661
LOC101463660	101463660	lymphoid-restricted membrane protein(LOC101463660)	20	3596552	3599336
lmbr1l	101463661	limb development membrane protein 1-like(lmbr1l)	20	2465357	2478962
dlgap4	101463707	discs, large (Drosophila) homolog-associated protein 4a(dlgap4a)	20	19595074	19700537
LOC101463755	101463755	ankyrin repeat domain-containing protein SOWAHB(LOC101463755)	20	14814016	14840409
LOC101463803	101463803	sodium- and chloride-dependent taurine transporter(LOC101463803)	20	16736072	16752863
LOC101463839	101463839	pepsin A-like(LOC101463839)	20	3924291	3927015
LOC101463894	101463894	deoxyribonuclease I-like 1(dnase1l1)	20	23366496	23372185
LOC101463896	101463896	uncharacterized LOC101463896(LOC101463896)	20	17796961	17802023
nt5dc2	101463898	5'-nucleotidase domain containing 2(nt5dc2)	20	21109107	21118619
LOC101463906	101463906	uncharacterized LOC101463906(LOC101463906)	20	9934372	9944214
LOC101463960	101463960	LIM domain and actin binding 1a(lima1a)	20	24917198	24945407
LOC101464016	101464016	von Willebrand factor A domain containing 1(vwa1)	20	10345986	10353976
LOC101464044	101464044	uncharacterized LOC101464044(zgc:154075)	20	7135531	7141422
LOC101464052	101464052	ubiquitin specific peptidase 21(usp21)	20	911766	916407
LOC101464056	101464056	iroquois homeobox 7(irx7)	20	14845662	14847064
letmd1	101464057	LETM1 domain containing 1(letmd1)	20	22522412	22531067
soga1	101464139	suppressor of glucose, autophagy associated 1(soga1)	20	8646092	8734458
ttll10	101464202	tubulin tyrosine ligase-like family, member 10(ttll10)	20	9944826	9981775
abtb1	101464290	ankyrin repeat and BTB (POZ) domain containing 1(abtb1)	20	16768936	16777275
rpl10a	101464337	ribosomal protein L10a(rpl10a)	20	3593646	3595612
wnt10b	101464338	wingless-type MMTV integration site family, member 10b(wnt10b)	20	2429333	2433257
LOC101464339	101464339	rho-related GTP-binding protein RhoA-C(LOC101464339)	20	906845	910309
ormdl2	101464341	ORMDL sphingolipid biosynthesis regulator 2(ormdl2)	20	22487934	22498754
LOC101464386	101464386	caspase recruitment domain-containing protein 19(LOC101464386)	20	17792295	17796833
LOC101464388	101464388	6-phosphofructo-2-kinase/fructose-2,6-bisphosphatase 2(LOC101464388)	20	19705994	19724097
LOC101464389	101464389	uncharacterized LOC101464389(zgc:162200)	20	21122651	21144474
cep104	101464416	centrosomal protein 104(cep104)	20	8780450	8817139
LOC101464528	101464528	zinc finger and BTB domain containing 48(zbtb48)	20	14702515	14712429
LOC101464571	101464571	keratin, type II cytoskeletal 8(LOC101464571)	20	16782757	16788012
LOC101464615	101464615	oxysterol binding protein-like 2b(osbpl2b)	20	8611226	8638381
arf3	101464624	ADP-ribosylation factor 3a(arf3a)	20	2422994	2427370
LOC101464627	101464627	SPRY domain containing 3(spryd3)	20	24837428	24915553
LOC101464674	101464674	faciogenital dysplasia(fgd)	20	17815842	17869304
LOC101464687	101464687	mitochondrial contact site and cristae organizing system subunit 10(micos10)	20	10379205	10381883
taf10	101464709	TAF10 RNA polymerase II, TATA box binding protein (TBP)-associated factor(taf10)	20	7131281	7135080
lrrc47	101464710	leucine rich repeat containing 47(lrrc47)	20	8775449	8779958
LOC101464765	101464765	ribosomal protein L10(rpl10)	20	23360709	23364438
fance	101464808	FA complementation group E(fance)	20	3587157	3592345
lrrc23	101464809	leucine rich repeat containing 23(lrrc23)	20	890445	895438
nol9	101464813	nucleolar protein 9(nol9)	20	14712480	14724724
LOC101464814	101464814	nuclear envelope integral membrane protein 1(nemp1)	20	22498770	22508139
LOC101464853	101464853	NACHT, LRR and PYD domains-containing protein 12(si:ch73-233m11.2)	20	16789536	16793338
scube3	101464855	signal peptide, CUB domain, EGF-like 3(scube3)	20	19735820	19812380
LOC101464899	101464899	bassoon presynaptic cytomatrix protein a(bsna)	20	8481500	8608576
LOC101464910	101464910	insulin-like growth factor binding protein 6b(igfbp6b)	20	24830752	24834985
htr6	101464971	5-hydroxytryptamine (serotonin) receptor 6(htr6)	20	10372919	10379124
gpr160	101464991	G protein-coupled receptor 160(si:dkeyp-100a1.6)	20	7122427	7127816
lg20h1orf127	101464992	linkage group 20 C1orf127 homolog(lg20h1orf127)	20	5111224	5118814
LOC101464993	101464993	acanthoscurrin-2(LOC101464993)	20	8440285	8481467
LOC101465053	101465053	filamin A, alpha (actin binding protein 280)(flna)	20	23299134	23342351
apex2	101465054	APEX nuclease (apurinic/apyrimidinic endonuclease) 2(apex2)	20	21144684	21149814
mib2	101465067	MIB E3 ubiquitin protein ligase 2(mib2)	20	9997323	10033109
LOC101465093	101465093	PAN2-PAN3 deadenylation complex catalytic subunit PAN2-like(LOC101465093)	20	22311185	22317875
ppard	101465104	peroxisome proliferator-activated receptor delta b(ppardb)	20	3573245	3582141
LOC101465105	101465105	erb-b2 receptor tyrosine kinase 3b(erbb3b)	20	2406380	2419750
klhl21	101465109	kelch-like family member 21(klhl21)	20	14683798	14700468
LOC101465150	101465150	ceramide synthase 5(LOC101465150)	20	16793483	16800993
LOC101465152	101465152	protein bicaudal D homolog 2(LOC101465152)	20	17873968	17914491
LOC101465153	101465153	uncharacterized LOC101465153(si:dkey-93l1.9)	20	23257508	23260092
pip4k2c	101465205	phosphatidylinositol-5-phosphate 4-kinase, type II, gamma a(pip4k2ca)	20	24807099	24822369
tmco4	101465258	transmembrane and coiled-coil domains 4(tmco4)	20	10363627	10372559
ppih	101465278	peptidylprolyl isomerase H (cyclophilin H)(ppih)	20	7112508	7130344
tardbp	101465279	TAR DNA binding protein a(tardbpa)	20	5106017	5111114
LOC101465280	101465280	sema domain, immunoglobulin domain (Ig), short basic domain, secreted, (semaphorin) 3H(sema3h)	20	8238016	8291414
LOC101465289	101465289	RNA binding motif protein 10(rbm10)	20	895530	906408
LOC101465340	101465340	sodium-coupled neutral amino acid transporter 3(LOC101465340)	20	21150848	21164632
LOC101465377	101465377	helicase ARIP4(LOC101465377)	20	8333197	8391916
LOC101465378	101465378	thyrotropin-releasing hormone receptor(LOC101465378)	20	22241419	22244638
LOC101465390	101465390	proliferation-associated 2G4, b(pa2g4b)	20	2399705	2405068
pan2	101465394	poly(A) specific ribonuclease subunit PAN2(pan2)	20	22455766	22470467
LOC101465486	101465486	G protein-coupled receptor 182(gpr182)	20	24798658	24801460
LOC101465527	101465527	complement receptor type 1(LOC101465527)	20	19728085	19735817
ybx1	101465558	Y box binding protein 1(ybx1)	20	7103283	7108062
borcs6	101465559	BLOC-1 related complex subunit 6(borcs6)	20	8221848	8232286
LOC101465572	101465572	makorin, ring finger protein, 4(mkrn4)	20	3582307	3586767
LOC101465621	101465621	sarcolemma associated protein b(slmapb)	20	16801004	16810680
tmem115	101465664	transmembrane protein 115(tmem115)	20	8319780	8326363
pgd	101465665	phosphogluconate dehydrogenase(pgd)	20	5094508	5099729
ocstamp	101465666	osteoclast stimulatory transmembrane protein(ocstamp)	20	22237119	22239320
LOC101465676	101465676	uncharacterized LOC101465676(LOC101465676)	20	2396678	2397513
LOC101465721	101465721	NLR family, CARD domain containing 3-like(nlrc3l)	20	23272816	23283530
fbxw12	101465722	F-box and WD repeat domain containing 12(fbxw12)	20	17921836	17926520
sike1	101465739	suppressor of IKBKE 1(sike1)	20	10382072	10385522
LOC101465773	101465773	transketolase b(tktb)	20	881377	889833
zbtb39	101465778	zinc finger and BTB domain containing 39(zbtb39)	20	24790310	24795841
LOC101465779	101465779	olfactomedin-like 3a(olfml3a)	20	14553416	14562497
LOC101465830	101465830	specifically androgen-regulated gene protein(LOC101465830)	20	19819711	19827452
LOC101465831	101465831	semaphorin-3F(LOC101465831)	20	21169587	21180210
xpc	101465861	xeroderma pigmentosum, complementation group C(xpc)	20	8130694	8141191
LOC101465872	101465872	extended synaptotagmin-like protein 1a(esyt1a)	20	2376671	2393670
ubiad1	101465938	UbiA prenyltransferase domain containing 1(ubiad1)	20	10037128	10042120
LOC101465971	101465971	ras homolog gene family, member Ab(rhoab)	20	8300941	8315368
ube4b	101465972	ubiquitination factor E4B, UFD2 homolog (S. cerevisiae)(ube4b)	20	5004741	5024231
LOC101466018	101466018	protein tyrosine phosphatase domain containing 1b(ptpdc1b)	20	17917803	17921781
def6	101466063	DEF6 guanine nucleotide exchange factor(def6)	20	3561166	3570872
LOC101466064	101466064	extracellular matrix protein 2(si:dkey-32e6.6)	20	863082	876415
agap2	101466069	ArfGAP with GTPase domain, ankyrin repeat and PH domain 2(agap2)	20	24754459	24788440
c1qtnf12	101466070	C1q and TNF related 12(c1qtnf12)	20	14494854	14515201
LOC101466112	101466112	testis specific protein Y-linked(tspy)	20	21187529	21198201
LOC101466158	101466158	prestin(LOC101466158)	20	7863787	7876035
fmnl3	101466169	formin-like 3(fmnl3)	20	2344620	2376398
csde1	101466231	cold shock domain containing E1, RNA-binding(csde1)	20	10386082	10401626
LOC101466313	101466313	protein Wnt-7a(LOC101466313)	20	17927198	17935910
anks1a	101466314	ankyrin repeat and sterile alpha motif domain containing 1A(anks1a)	20	19830874	19895482
samhd1	101466315	SAM domain and HD domain 1(samhd1)	20	24265561	24279511
LOC101466360	101466360	trophinin associated protein(troap)	20	3549586	3559303
bgn	101466361	biglycan b(bgnb)	20	839510	856315
LOC101466457	101466457	Glyco_hydro_56 domain-containing protein(si:dkey-72l14.3)	20	8200794	8219109
arhgef16	101466458	Rho guanine nucleotide exchange factor (GEF) 16(arhgef16)	20	7090714	7103058
LOC101466593	101466593	fibulin-2(LOC101466593)	20	17966374	17990155
LOC101466594	101466594	probable G-protein coupled receptor 173(LOC101466594)	20	21214533	21219838
LOC101466595	101466595	dedicator of cytokinesis protein 3(LOC101466595)	20	16607042	16658650
mmp23b	101466603	matrix metallopeptidase 23ba(mmp23ba)	20	10046946	10056186
lzic	101466633	leucine zipper and CTNNBIP1 domain containing(lzic)	20	4992095	4994597
LOC101466647	101466647	UDP-Gal:betaGlcNAc beta 1,4- galactosyltransferase, polypeptide 3(b4galt3)	20	833121	839184
LOC101466697	101466697	ribosomal biogenesis protein LAS1L(LOC101466697)	20	23263425	23265798
LOC101466698	101466698	abhydrolase domain containing 6, acylglycerol lipase b(abhd6b)	20	16815115	16820895
LOC101466728	101466728	uncharacterized protein K02A2.6-like(LOC101466728)	20	12105227	12109221
arih2	101466733	ariadne homolog 2 (Drosophila)(arih2)	20	8108908	8129372
acot7	101466734	acyl-CoA thioesterase 7(acot7)	20	6960389	7020648
sdf4	101466747	stromal cell derived factor 4(sdf4)	20	14480480	14492604
LOC101466826	101466826	phosphofructokinase, muscle a(pfkma)	20	3529825	3546903
ppp1r3f	101466864	protein phosphatase 1 regulatory subunit 3F(si:ch211-167b20.8)	20	21199536	21210553
dcaf1	101466865	DDB1 and CUL4 associated factor 1(dcaf1)	20	16663430	16689706
LOC101466870	101466870	cyclin-dependent kinase 11B(cdk11b)	20	10057245	10074741
nmnat1	101466903	nicotinamide nucleotide adenylyltransferase 1(nmnat1)	20	4994634	5000192
LOC101466914	101466914	low density lipoprotein receptor-related protein 1Ab(lrp1ab)	20	2250947	2331857
LOC101466953	101466953	potassium channel tetramerization domain containing 6b(kctd6b)	20	16820960	16828991
impdh2	101466997	IMP (inosine 5'-monophosphate) dehydrogenase 2(impdh2)	20	8081773	8102917
LOC101466998	101466998	CAP-Gly domain-containing linker protein 1-like(LOC101466998)	20	7597585	7600354
LOC101467014	101467014	homeodomain interacting protein kinase 1a(hipk1a)	20	14468275	14478869
nup210	101467061	nucleoporin 210(nup210)	20	17997625	18031768
tspan31	101467115	tetraspanin 31(tspan31)	20	24735416	24746123
haus7	101467163	HAUS augmin-like complex, subunit 7(haus7)	20	23248806	23255331
taf11	101467165	TAF11 RNA polymerase II, TATA box binding protein (TBP)-associated factor(taf11)	20	19896137	19899403
LOC101467166	101467166	deoxyribonuclease gamma-like(LOC101467166)	20	16780103	16782155
LOC101467210	101467210	RNA binding motif, single stranded interacting protein 2b(rbms2b)	20	2229376	2245754
LOC101467295	101467295	piezo-type mechanosensitive ion channel component 2-like(si:dkey-11f4.7)	20	7440629	7473963
LOC101467308	101467308	ATPase H+ transporting accessory protein 1 like b(atp6ap1lb)	20	813727	827508
LOC101467405	101467405	membrane-associated ring finger (C3HC4) 9(march9)	20	24696505	24720691
LOC101467446	101467446	osteoglycin, paralog b(ognb)	20	16834414	16836935
qars	101467448	glutaminyl-tRNA synthetase 1(qars1)	20	17259625	17273694
dalrd3	101467492	DALR anticodon binding domain containing 3(dalrd3)	20	8058526	8069239
LOC101467502	101467502	la-related protein 4(LOC101467502)	20	3514900	3528059
LOC101467505	101467505	arf-GAP with coiled-coil, ANK repeat and PH domain-containing protein 3(LOC101467505)	20	14398902	14466595
tas1r2	101467598	taste 1 receptor member 2(tas1r2)	20	7249079	7252836
lrtm1	101467612	leucine rich repeats and transmembrane domains 1(lrtm1)	20	680255	686302
r3hdml	101467617	R3H domain containing-like(r3hdml)	20	15689855	15692766
LOC101467667	101467667	deoxynucleoside triphosphate triphosphohydrolase SAMHD1-like(LOC101467667)	20	24543608	24551078
uhrf1bp1	101467668	UHRF1 binding protein 1(uhrf1bp1)	20	19899516	19918687
LOC101467715	101467715	SUMO specific peptidase 1(senp1)	20	2217669	2226584
LOC101467721	101467721	uncharacterized LOC101467721(LOC101467721)	20	24692154	24694076
smim4	101467755	small integral membrane protein 4(smim4)	20	16831147	16834809
wdr13	101467756	WD repeat domain 13(wdr13)	20	21225971	21233860
LOC101467757	101467757	cytosolic sulfotransferase 3(LOC101467757)	20	17396518	17399074
gpr153	101467795	G protein-coupled receptor 153(gpr153)	20	6912945	6955100
ampd1	101467876	adenosine monophosphate deaminase 1 (isoform M)(ampd1)	20	10408871	10418282
clstn1	101467902	calsyntenin 1(clstn1)	20	4951852	4990311
espn	101467903	espin(espn)	20	7051652	7088890
cacna2d3	101467919	calcium voltage-gated channel auxiliary subunit alpha2delta 3(LOC101467919)	20	659565	790740
ctdsp2	101467923	CTD (carboxy-terminal domain, RNA polymerase II, polypeptide A) small phosphatase 2(ctdsp2)	20	24643959	24653647
LOC101467924	101467924	P2Y purinoceptor 1-like(LOC101467924)	20	15550645	15551641
LOC101467971	101467971	snail family zinc finger 1b(snai1b)	20	24247696	24250244
LOC101467973	101467973	IQ motif and SEC7 domain-containing protein 1(LOC101467973)	20	18036351	18130816
lg20h6orf106	101467974	inflammation and lipid regulator with UBA-like and NBR1-like domains(LOC101467974)	20	19919941	19929431
mfsd5	101468017	major facilitator superfamily domain containing 5(mfsd5)	20	2207204	2209913
LOC101468055	101468055	14-3-3 protein beta/alpha(LOC101468055)	20	16840025	16844612
LOC101468057	101468057	cysteine-rich with EGF-like domain protein 1(LOC101468057)	20	17688105	17697633
celsr3	101468096	cadherin, EGF LAG seven-pass G-type receptor 3(celsr3)	20	7897213	8020188
nphp4	101468167	nephronophthisis 4(nphp4)	20	8829967	9009426
LOC101468206	101468206	transcription factor HES-2(LOC101468206)	20	7027922	7031224
asb8	101468221	ankyrin repeat and SOCS box containing 8(asb8)	20	3508577	3513581
LOC101468225	101468225	natural resistance-associated macrophage protein 2(LOC101468225)	20	24659310	24689006
LOC101468226	101468226	PHD and RING finger domain-containing protein 1(LOC101468226)	20	14376191	14383476
LOC101468227	101468227	P2Y purinoceptor 1-like(LOC101468227)	20	15541044	15542219
tp53inp2	101468278	tumor protein p53 inducible nuclear protein 2(tp53inp2)	20	24221049	24231038
LOC101468280	101468280	protein kinase C and casein kinase substrate in neurons protein 1(LOC101468280)	20	19931124	19965226
faim2	101468314	Fas apoptotic inhibitory molecule 2(faim2)	20	2210180	2216032
dennd2c	101468377	DENN/MADD domain containing 2C(dennd2c)	20	10419281	10438016
LOC101468418	101468418	protein Wnt-5a(LOC101468418)	20	613074	624885
LOC101468497	101468497	taste receptor type 1 member 2-like(LOC101468497)	20	6889425	6893145
LOC101468498	101468498	transcription factor HES-2-like(LOC101468498)	20	7021645	7022563
LOC101468512	101468512	testis enhanced gene transcript (BAX inhibitor 1)(tegt)	20	24630738	24643074
LOC101468513	101468513	P2Y purinoceptor 1-like(LOC101468513)	20	15537344	15538351
rarg	101468595	retinoic acid receptor gamma a(rarga)	20	2152194	2205096
porcn	101468644	porcupine O-acyltransferase(porcn)	20	21237682	21245904
ninj1	101468645	ninjurin 1(LOC101468645)	20	17787210	17790445
atf7	101468715	activating transcription factor 7a(atf7a)	20	3485772	3506092
hmga1	101468767	high mobility group AT-hook 1a(hmga1a)	20	19976097	19982843
LOC101468803	101468803	uncharacterized LOC101468803(LOC101468803)	20	7891144	7896278
LOC101468804	101468804	dihydroxyacetone phosphate acyltransferase(LOC101468804)	20	6849619	6876589
ctnnbip1	101468805	catenin, beta interacting protein 1(ctnnbip1)	20	4903490	4928729
LOC101468806	101468806	hairy-related 3(her3)	20	6908754	6909784
LOC101468820	101468820	P2Y purinoceptor 1-like(LOC101468820)	20	15522394	15523407
LOC101468870	101468870	RING finger protein 223(LOC101468870)	20	10448369	10453824
LOC101468893	101468893	nuclear receptor subfamily 1, group D, member 4a(nr1d4a)	20	2194754	2206801
ggt7	101468939	gamma-glutamyltransferase 7(ggt7)	20	24204144	24216278
LOC101468941	101468941	uncharacterized LOC101468941(LOC101468941)	20	21234625	21235731
LOC101468942	101468942	heavy metal-binding protein HIP-like(LOC101468942)	20	17955149	17957020
LOC101469003	101469003	disco-interacting protein 2 homolog Ba(dip2ba)	20	3436532	3481822
tmem82	101469057	transmembrane protein 82(tmem82)	20	9711017	9716044
pik3cd	101469095	phosphatidylinositol-4,5-bisphosphate 3-kinase, catalytic subunit delta(pik3cd)	20	4882757	4902248
LOC101469096	101469096	taste receptor type 1 member 1-like(LOC101469096)	20	6896106	6901694
LOC101469110	101469110	toll-like receptor 9(tlr9)	20	445111	450363
LOC101469114	101469114	lysophosphatidic acid receptor 6(LOC101469114)	20	14372223	14373843
LOC101469115	101469115	P2Y purinoceptor 1-like(LOC101469115)	20	15514333	15516311
klhdc8b	101469139	kelch domain containing 8B(klhdc8b)	20	13464548	13751068
LOC101469158	101469158	embryonic polyadenylate-binding protein(LOC101469158)	20	16844810	16859483
LOC101469161	101469161	testis-specific zinc finger protein topi(LOC101469161)	20	21248703	21253622
LOC101469162	101469162	plexin-B1(LOC101469162)	20	11927117	12015186
LOC101469206	101469206	NCK-associated protein 5-like(nckap5l)	20	15838246	15896594
LOC101469253	101469253	5-aminolevulinate synthase, nonspecific, mitochondrial-like(LOC101469253)	20	18247385	18250289
wdr6	101469295	WD repeat domain 6(wdr6)	20	7884124	7890693
LOC101469361	101469361	protein tyrosine phosphatase non-receptor type 11b(ptpn11b)	20	10455964	10470921
tmem201	101469395	transmembrane protein 201(tmem201)	20	4864099	4876194
ttc34	101469396	tetratricopeptide repeat domain 34(ttc34)	20	6114885	6123325
ints11	101469406	integrator complex subunit 11(ints11)	20	14355216	14372144
LOC101469448	101469448	PDZ domain-containing protein 4(LOC101469448)	20	21265111	21293916
LOC101469449	101469449	SRSF protein kinase 3(si:ch211-220i18.4)	20	12019058	12028805
LOC101469494	101469494	transmembrane protease serine 12-like(LOC101469494)	20	3428769	3433401
LOC101469533	101469533	dysbindin-A(LOC101469533)	20	18363821	18374606
LOC101469581	101469581	calcium binding and coiled-coil domain 1a(calcoco1a)	20	2135422	2149341
LOC101469582	101469582	acylaminoacyl-peptide hydrolase(apeh)	20	437111	444775
LOC101469601	101469601	uncharacterized LOC101469601(si:dkey-32e6.3)	20	13454293	13462079
LOC101469619	101469619	RNA binding motif protein 39b(rbm39b)	20	16862285	16870125
LOC101469620	101469620	glycoprotein IX (platelet)(gp9)	20	18131467	18132769
rer1	101469661	retention in endoplasmic reticulum sorting receptor 1(rer1)	20	6832632	6840293
cptp	101469673	ceramide-1-phosphate transfer protein(cptp)	20	14348278	14354415
LOC101469712	101469712	LHFPL tetraspan subfamily member 4 protein(LOC101469712)	20	12040316	12078281
LOC101469760	101469760	sodium channel, voltage gated, type VIII, alpha subunit a(scn8aa)	20	3382920	3428175
LOC101469806	101469806	uncharacterized LOC101469806(zgc:66479)	20	20264750	20271242
LOC101469807	101469807	B-cadherin-like(LOC101469807)	20	18418765	18419954
LOC101469848	101469848	forkhead box L2-like(foxl2l)	20	4862025	4863399
hoxc13	101469865	homeobox C13a(hoxc13a)	20	2081272	2085262
LOC101469905	101469905	solute carrier family 12 member 5(LOC101469905)	20	16876741	16913606
LOC101469906	101469906	haloacid dehalogenase-like hydrolase domain-containing 5(LOC101469906)	20	18133170	18137973
LOC101469907	101469907	lysine (K)-specific demethylase 5C(kdm5c)	20	21295959	21319953
ncoa6	101469995	nuclear receptor coactivator 6(ncoa6)	20	24186852	24201636
LOC101469997	101469997	copine-9(LOC101469997)	20	12113426	12223538
LOC101470040	101470040	fidgetin like 2(fignl2)	20	3325172	3338198
LOC101470041	101470041	capping actin protein of muscle Z-line subunit alpha 1b(capza1b)	20	431649	436685
kansl2	101470044	KAT8 regulatory NSL complex subunit 2(kansl2)	20	15826997	15837619
LOC101470088	101470088	Translocating chain-associated membrane protein 1-like 1-like(zgc:113278)	20	19067696	19075526
LOC101470130	101470130	solute carrier family 26 member 6(slc26a6)	20	7829784	7851772
hes4	101470131	hairy-related 9(her9)	20	4809170	4811128
hoxc12	101470151	homeobox C12a(hoxc12a)	20	2070700	2074417
ubxn10	101470156	UBX domain protein 10(ubxn10)	20	14346303	14347535
usp19	101470174	ubiquitin specific peptidase 19(usp19)	20	13429358	13453069
LOC101470196	101470196	CCHC-type zinc finger, nucleic acid binding protein a(cnbpa)	20	18138697	18142430
LOC101470197	101470197	IQ motif and Sec7 domain ArfGEF 2b(iqsec2b)	20	21322616	21354414
LOC101470228	101470228	WAP four-disulfide core domain 2(wfdc2)	20	5875961	5886726
LOC101470239	101470239	formin-like protein 13(LOC101470239)	20	14859897	14913556
LOC101470283	101470283	DNA topoisomerase Ib(top1b)	20	24167540	24183278
LOC101470284	101470284	synaptotagmin-2(LOC101470284)	20	20294797	20361491
LOC101470285	101470285	Krueppel-like factor 15(LOC101470285)	20	12238766	12250846
LOC101470322	101470322	taste receptor type 1 member 1-like(LOC101470322)	20	6840383	6844639
LOC101470331	101470331	CTTNBP2 N-terminal like b(cttnbp2nlb)	20	416658	431549
eif2d	101470379	eukaryotic translation initiation factor 2D(eif2d)	20	16943454	16991549
baz2a	101470380	bromodomain adjacent to zinc finger domain, 2A(baz2a)	20	19207189	19223734
hoxc11	101470437	homeobox C11a(hoxc11a)	20	2058100	2061315
LOC101470444	101470444	DEAD-box helicase 19a(ddx19a)	20	14336437	14345630
LOC101470464	101470464	laminin, beta 2 (laminin S)(lamb2)	20	13384435	13428585
pex14	101470520	peroxisomal biogenesis factor 14(pex14)	20	5349131	5394275
LOC101470531	101470531	major intrinsic protein of lens fiber a(mipa)	20	3285257	3289285
LOC101470535	101470535	cyclin T1(ccnt1)	20	15819739	15826496
LOC101470536	101470536	synaptotagmin VIa(syt6a)	20	14568276	14652725
plcg1	101470576	phospholipase C, gamma 1(plcg1)	20	24134451	24165277
tprg1l	101470614	tumor protein p63 regulated 1-like(tprg1l)	20	6786544	6790973
LOC101470615	101470615	PPARGC1 and ESRR induced regulator, muscle 1(perm1)	20	4736154	4743624
kcnd3	101470631	potassium voltage-gated channel, Shal-related subfamily, member 3(kcnd3)	20	183982	301358
fmod	101470684	fibromodulin b(fmodb)	20	17009142	17013104
raf1	101470685	Raf-1 proto-oncogene, serine/threonine kinase a(raf1a)	20	18143962	18156538
naca	101470686	nascent polypeptide associated complex subunit alpha(naca)	20	19235959	19246462
LOC101470732	101470732	homeobox C10a(hoxc10a)	20	2048916	2051833
vwa5b1	101470737	von Willebrand factor A domain containing 5B1(vwa5b1)	20	14302387	14334322
LOC101470785	101470785	solute carrier family 41 member 1(LOC101470785)	20	12339434	12380768
kif1b	101470824	kinesin family member 1B(kif1b)	20	5025374	5087612
LOC101470833	101470833	signal transducer and activator of transcription 6, interleukin-4 induced(stat6)	20	3289395	3313414
LOC101470836	101470836	tyrosine-protein kinase STYK1(si:ch73-206d17.1)	20	14048280	14052732
rab5if	101470883	RAB5 interacting factor(rab5if)	20	24107276	24113768
LOC101470884	101470884	membrane-associated guanylate kinase, WW and PDZ domain-containing protein 1(LOC101470884)	20	21359112	21406744
wrap73	101470921	WD repeat containing, antisense to TP73(wrap73)	20	6790686	6807796
noc2l	101470922	NOC2-like nucleolar associated transcriptional repressor(noc2l)	20	4671839	4693611
LOC101470954	101470954	laminin, beta 2-like(lamb2l)	20	13318883	13381949
sarnp	101471020	SAP domain containing ribonucleoprotein(sarnp)	20	15807364	15815093
mul1	101471021	mitochondrial E3 ubiquitin protein ligase 1b(mul1b)	20	14284401	14289894
plekhn1	101471094	pleckstrin homology domain containing, family N member 1(plekhn1)	20	4722332	4735050
LOC101471106	101471106	prostaglandin E synthase 3a (cytosolic)(ptges3a)	20	3279027	3282922
LOC101471161	101471161	zinc fingers and homeoboxes 3b(zhx3b)	20	24118243	24132423
LOC101471162	101471162	colony stimulating factor 1b (macrophage)(csf1b)	20	17013182	17023701
klhl17	101471193	kelch-like family member 17(klhl17)	20	4693707	4708481
LOC101471202	101471202	homeobox protein HOX3-like(LOC101471202)	20	1994457	1997190
LOC101471251	101471251	metabotropic glutamate receptor 4(LOC101471251)	20	20002962	20205247
LOC101471300	101471300	premelanosome protein b(pmelb)	20	15791768	15802401
fam43b	101471301	family with sequence similarity 43 member B(fam43b)	20	14269837	14272147
LOC101471340	101471340	vestigial-like family member 4a(vgll4a)	20	18177014	18184173
LOC101471341	101471341	protein phosphatase 1 regulatory subunit 12B(LOC101471341)	20	20278737	20292795
tp73	101471388	tumor protein p73(tp73)	20	6805487	6832569
dtx3	101471402	deltex E3 ubiquitin ligase 3(dtx3)	20	3265723	3270878
cs	101471407	citrate synthase(cs)	20	22644386	22661123
hoxc5	101471491	homeobox C5a(hoxc5a)	20	2016775	2019703
LOC101471538	101471538	immunoglobulin-like and fibronectin type III domain-containing protein 1(LOC101471538)	20	20248838	20263193
LOC101471595	101471595	tubulin, alpha 1c(tuba1c)	20	15788352	15791319
LOC101471596	101471596	trypsin-like(LOC101471596)	20	14209475	14220080
LOC101471620	101471620	phosphatidylinositol 4,5-bisphosphate 3-kinase catalytic subunit(si:rp71-17i16.5)	20	13281383	13299889
dhx35	101471638	DEAH-box helicase 35(dhx35)	20	24098251	24105791
LOC101471639	101471639	synapsin IIa(syn2a)	20	18160997	18173991
LOC101471640	101471640	carbohydrate sulfotransferase 11(LOC101471640)	20	12381021	12401405
samd11	101471684	sterile alpha motif domain containing 11(samd11)	20	4620655	4670848
LOC101471685	101471685	ataxin 7-like 2b(atxn7l2b)	20	4145117	4151150
gpkow	101471741	G patch domain and KOW motifs(gpkow)	20	21407574	21420297
hoxc6	101471784	homeobox C6a(hoxc6a)	20	2020496	2022736
LOC101471847	101471847	TELO2-interacting protein 1 homolog(LOC101471847)	20	10129961	10143721
ddx20	101471888	DEAD (Asp-Glu-Ala-Asp) box polypeptide 20(ddx20)	20	169625	178629
jph2	101471892	junctophilin 2(jph2)	20	15735135	15762204
LOC101471893	101471893	trypsin-3-like(LOC101471893)	20	14193888	14196012
LOC101471916	101471916	troponin C2, fast skeletal type, tandem duplicate 2(tnnc2.2)	20	13241377	13244531
mafb	101471935	v-maf avian musculoaponeurotic fibrosarcoma oncogene homolog Ba(mafba)	20	23883858	23887673
LOC101472021	101472021	renin(ren)	20	17029763	17035562
timm17b	101472023	translocase of inner mitochondrial membrane 17 homolog B (yeast)(timm17b)	20	21424071	21428468
LOC101472065	101472065	Rho family GTPase 1b(rnd1b)	20	3241311	3251557
LOC101472162	101472162	transmembrane prolyl 4-hydroxylase(LOC101472162)	20	102041	115037
LOC101472165	101472165	tubulin alpha-1B chain(LOC101472165)	20	14183697	14186496
LOC101472191	101472191	troponin C2, fast skeletal type, tandem duplicate 1(tnnc2.1)	20	13245924	13253911
rnf114	101472213	ring finger protein 114(rnf114)	20	23839249	23842927
hoxc8	101472261	homeobox C8a(hoxc8a)	20	2031598	2035232
LOC101472309	101472309	membrane-associated guanylate kinase, WW and PDZ domain-containing protein 1(LOC101472309)	20	17056609	17149724
LOC101472311	101472311	solute carrier family 6 member 1a(slc6a1a)	20	18200587	18209998
oard1	101472312	O-acyl-ADP-ribose deacylase 1(oard1)	20	20362790	20365213
pqbp1	101472313	polyglutamine binding protein 1(pqbp1)	20	21420348	21424094
LOC101472360	101472360	calcium channel, voltage-dependent, beta 3b(cacnb3b)	20	3203536	3227265
fitm2	101472366	fat storage inducing transmembrane protein 2(fitm2)	20	15678133	15701527
LOC101472405	101472405	N-fatty-acyl-amino acid synthase/hydrolase PM20D1.2(LOC101472405)	20	20619421	20626408
LOC101472406	101472406	plexin-A1(LOC101472406)	20	11317598	11629567
LOC101472435	101472435	protein-glutamine gamma-glutamyltransferase 2-like(LOC101472435)	20	10787443	10802037
pink1	101472469	PTEN induced kinase 1(pink1)	20	14186788	14191255
slc35c2	101472496	solute carrier family 35 member C2(slc35c2)	20	13227598	13238574
spata2	101472518	spermatogenesis associated 2(spata2)	20	23832502	23839223
hoxc9	101472568	homeobox C9a(hoxc9a)	20	2038651	2041134
guca1b	101472619	guanylate cyclase activator 1B(guca1b)	20	20365432	20367352
LOC101472665	101472665	cyclin-dependent kinase 17(LOC101472665)	20	114863	162369
gdap1l1	101472669	ganglioside induced differentiation associated protein 1-like 1(gdap1l1)	20	15701538	15729538
LOC101472705	101472705	lamina-associated polypeptide 2(LOC101472705)	20	20626528	20630832
e2f1	101472732	E2F transcription factor 1(e2f1)	20	10804979	10815599
prdm16	101472744	PR domain containing 16(prdm16)	20	6599038	6773173
agmat	101472763	agmatine ureohydrolase (agmatinase)(agmat)	20	14178842	14182743
LOC101472796	101472796	troponin C type 1a (slow)(tnnc1a)	20	18227129	18231107
LOC101472797	101472797	calcium channel, voltage-dependent, L type, alpha 1F subunit a(cacna1fa)	20	21428802	21455228
hoxc4	101472851	homeobox C4(hoxc4)	20	1996937	2048828
LOC101472902	101472902	eukaryotic translation initiation factor 4E type 3(LOC101472902)	20	20374786	20378730
chchd6	101472905	coiled-coil-helix-coiled-coil-helix domain containing 6a(chchd6a)	20	11699569	11772811
rere	101472943	arginine-glutamic acid dipeptide (RE) repeats a(rerea)	20	4441802	4572265
hnf4a	101472956	hepatocyte nuclear factor 4, alpha(hnf4a)	20	15662962	15668962
taf13	101472983	TATA-box binding protein associated factor 13(taf13)	20	13238607	13240460
LOC101473002	101473002	opsin 7, group member b(opn7b)	20	23669777	23784567
was	101473005	WASP actin nucleation promoting factor(was)	20	21164783	21169578
znf341	101473027	zinc finger protein 341(znf341)	20	10816098	10824267
hspg2	101473055	heparan sulfate proteoglycan 2(hspg2)	20	14077470	14174019
LOC101473092	101473092	dual specificity protein phosphatase 7(LOC101473092)	20	18239210	18243809
syp	101473093	synaptophysin b(sypb)	20	21460662	21475712
LOC101473203	101473203	serine/threonine-protein phosphatase 4 regulatory subunit 2-A(LOC101473203)	20	20369101	20374642
LOC101473205	101473205	E3 ubiquitin/ISG15 ligase TRIM25-like(LOC101473205)	20	11773148	11777595
LOC101473251	101473251	elastase 2(ela2)	20	6531439	6533891
LOC101473262	101473262	adenylate cyclase 6b(adcy6b)	20	3158081	3191157
ttpal	101473266	tocopherol (alpha) transfer protein-like(ttpal)	20	15655176	15660579
dpm1	101473288	dolichyl-phosphate mannosyltransferase subunit 1, catalytic(dpm1)	20	13165046	13175725
slc9a8	101473304	solute carrier family 9 member 8(slc9a8)	20	23579838	23599381
spo11	101473389	SPO11 initiator of meiotic double stranded breaks(spo11)	20	18255991	18266246
LOC101473390	101473390	proteolipid protein 2(LOC101473390)	20	21482195	21501968
nfe2	101473441	nuclear factor, erythroid 2(nfe2)	20	1932518	1937447
LOC101473495	101473495	forkhead box protein P1-B(LOC101473495)	20	20379919	20390779
LOC101473551	101473551	UDP-N-acetyl-alpha-D-galactosamine:polypeptide N-acetylgalactosaminyltransferase 6 (GalNAc-T6)(galnt6)	20	3149023	3157577
tmem269	101473555	transmembrane protein 269(tmem269)	20	14052596	14071272
adnp	101473579	activity-dependent neuroprotector homeobox b(adnpb)	20	13153797	13163946
LOC101473594	101473594	rhodopsin(LOC101473594)	20	17152023	17153524
LOC101473595	101473595	major facilitator superfamily domain containing 2a-like 2(mfsd2al2)	20	21543752	21553736
LOC101473671	101473671	bone morphogenetic protein 7b(bmp7b)	20	18273304	18295988
LOC101473672	101473672	family with sequence similarity 110 member A(fam110a)	20	21539268	21542394
LOC101473715	101473715	elastase 2 like(ela2l)	20	6527073	6530124
ada	101473733	adenosine deaminase(ada)	20	15600846	15621940
LOC101473785	101473785	UDP-Gal:betaGlcNAc beta 1,4- galactosyltransferase, polypeptide 5(b4galt5)	20	23544293	23579185
mitfb	101473787	microphthalmia-associated transcription factor(mitfb)	20	20400643	20428832
LOC101473844	101473844	glucose-6-phosphate 1-dehydrogenase(LOC101473844)	20	3143606	3148432
LOC101473893	101473893	periphilin-1(LOC101473893)	20	17234574	17241172
LOC101473935	101473935	sodium- and chloride-dependent creatine transporter 1(si:ch211-117c9.5)	20	87101	101460
LOC101473974	101473974	interferon regulatory factor 10(irf10)	20	18299492	18308722
prickle3	101473975	prickle homolog 3(prickle3)	20	21513970	21538910
LOC101474019	101474019	transmembrane protein 51a(tmem51a)	20	6515298	6521584
eno1	101474020	enolase 1a, (alpha)(eno1a)	20	4430475	4439033
pkig	101474038	protein kinase (cAMP-dependent, catalytic) inhibitor gamma(pkig)	20	15622358	15649582
pard6b	101474065	par-6 partitioning defective 6 homolog beta (C. elegans)(pard6b)	20	13119195	13141653
emilin3	101474092	elastin microfibril interfacer 3(emilin3)	20	23508304	23526920
LOC101474118	101474118	itchy E3 ubiquitin protein ligase b(itchb)	20	10828390	10849946
LOC101474144	101474144	ceramide kinase family protein(zgc:158263)	20	3136976	3143353
hnrnpa1	101474145	heterogeneous nuclear ribonucleoprotein A1b(hnrnpa1b)	20	1937417	1941028
LOC101474186	101474186	prickle-like protein 2(LOC101474186)	20	17164194	17232479
actr8	101474312	actin related protein 8(actr8)	20	7757302	7761965
kazn	101474313	kazrin, periplakin interacting protein(kazn)	20	6318349	6502410
arfgef2	101474353	ADP-ribosylation factor guanine nucleotide-exchange factor 2 (brefeldin A-inhibited)(arfgef2)	20	13093803	13118692
aar2	101474379	AAR2 splicing factor(aar2)	20	23429155	23432570
LOC101474403	101474403	calcitonin receptor-like 2(calcrl2)	20	10850815	10890700
naa10	101474430	N-alpha-acetyltransferase 10, NatA catalytic subuni(naa10)	20	3129659	3132947
cbx5	101474431	chromobox homolog 5 (HP1 alpha homolog, Drosophila)(cbx5)	20	1941606	1945144
LOC101474461	101474461	ataxin-1-like(zmp:0000000926)	20	18308729	18325797
selenok	101474591	selenoprotein K(selenok)	20	7762595	7768511
bcl2l1	101474628	BCL2 like 1(bcl2l1)	20	13059576	13093048
qrich1	101474648	glutamine rich 1(qrich1)	20	17246567	17258241
LOC101474651	101474651	peptidyl-prolyl cis-trans isomerase FKBP1A(LOC101474651)	20	21557510	21562782
LOC101474679	101474679	vitamin D3 receptor A(LOC101474679)	20	10917722	10992744
LOC101474695	101474695	solute carrier family 2, facilitated glucose transporter member 5(LOC101474695)	20	4388652	4400309
copz1	101474710	COPI coat complex subunit zeta 1(copz1)	20	1922434	1927146
LOC101474832	101474832	2-epi-5-epi-valiolone synthase-like(LOC101474832)	20	20394302	20398853
cacna1d	101474865	calcium channel, voltage-dependent, L type, alpha 1D subunit, b(cacna1db)	20	7647501	7736449
LOC101474876	101474876	rho GTPase-activating protein 4(LOC101474876)	20	3120691	3129383
wisp2	101474881	cellular communication network factor 5(ccn5)	20	15576179	15589968
LOC101474930	101474930	pre-mRNA-processing factor 6(LOC101474930)	20	23405267	23422083
LOC101474932	101474932	receptor-type tyrosine-protein phosphatase V(LOC101474932)	20	17242378	17246582
LOC101474933	101474933	cadherin 26, tandem duplicate 1(cdh26.1)	20	18385045	18398693
LOC101474935	101474935	syntaphilin(LOC101474935)	20	21564312	21571885
LOC101474992	101474992	zinc finger protein 740b(znf740b)	20	1901835	1911391
lhfpl5	101475069	LHFPL tetraspan subfamily member 5b(lhfpl5b)	20	3682279	3686556
LOC101475124	101475124	FERM domain containing 4Bb(frmd4bb)	20	20434834	20460368
LOC101475151	101475151	histone deacetylase 7a(hdac7a)	20	11034723	11091289
samd10	101475219	sterile alpha motif domain containing 10b(samd10b)	20	15914595	15959476
LOC101475222	101475222	cadherin-13(LOC101475222)	20	18402493	18411776
LOC101475268	101475268	solute carrier family 2, facilitated glucose transporter member 5-like(LOC101475268)	20	4406439	4414204
LOC101475299	101475299	cytochrome c oxidase subunit 4 isoform 2, mitochondrial(LOC101475299)	20	13049627	13057388
LOC101475356	101475356	PR domain containing 2, with ZNF domain a(prdm2a)	20	6301917	6310241
ssr4	101475368	signal sequence receptor, delta(ssr4)	20	3115376	3119328
srpk1	101475369	SRSF protein kinase 1a(srpk1a)	20	3666182	3681685
LOC101475462	101475462	cysteine sulfinic acid decarboxylase(csad)	20	1894881	1901580
chdh	101475567	choline dehydrogenase(chdh)	20	7736198	7746221
ca6	101475568	carbonic anhydrase VI(ca6)	20	4400457	4419047
LOC101475623	101475623	RAD21 cohesin complex component like 1(rad21l1)	20	21571976	21580825
pdpn	101475665	uncharacterized LOC101475665(si:ch211-156j16.1)	20	6285053	6295483
LOC101475676	101475676	arginine vasopressin receptor 2a, duplicate a(avpr2aa)	20	3093307	3109305
huwe1	101475677	HECT, UBA and WWE domain containing E3 ubiquitin protein ligase 1(huwe1)	20	2956045	3007562
znf512b	101475723	zinc finger protein 512B(znf512b)	20	15964395	15992066
LOC101475768	101475768	P2Y purinoceptor 1(LOC101475768)	20	15571787	15573262
LOC101475769	101475769	membrane associated guanylate kinase, WW and PDZ domain containing 3a(magi3a)	20	13939205	14047437
LOC101475789	101475789	protein FAM110A(wu:fa11c10)	20	13003041	13006755
ogg1	101475812	8-oxoguanine DNA glycosylase(ogg1)	20	17272906	17276261
LOC101475846	101475846	twist-related protein 2(LOC101475846)	20	11092742	11096074
gpr157	101475858	G protein-coupled receptor 157(gpr157)	20	4377004	4386554
mtg2	101475917	mitochondrial ribosome-associated GTPase 2(mtg2)	20	18429331	18431991
idh3g	101475963	isocitrate dehydrogenase (NAD(+)) 3 non-catalytic subunit gamma(idh3g)	20	3069244	3075504
LOC101475964	101475964	protein FAM19A2(LOC101475964)	20	1589992	1685799
wnt1	101475965	wingless-type MMTV integration site family, member 1(wnt1)	20	2435180	2441052
lmod3	101476015	leiomodin 3 (fetal)(lmod3)	20	20461166	20464028
il17rb	101476042	interleukin 17 receptor B(il17rb)	20	7745924	7751844
LOC101476057	101476057	P2Y purinoceptor 1-like(LOC101476057)	20	15555042	15556477
LOC101476058	101476058	lysine-specific demethylase 9(LOC101476058)	20	13931350	13938811
LOC101476107	101476107	opsin 7, group member d(opn7d)	20	21589405	21601346
ctnnbl1	101476140	catenin, beta like 1(ctnnbl1)	20	10651887	10728111
LOC101476151	101476151	forkhead box protein J3(LOC101476151)	20	6209380	6283810
ss18l1	101476204	SS18L1 subunit of BAF chromatin remodeling complex(ss18l1)	20	18432756	18441753
LOC101476262	101476262	homeobox C1a(hoxc1a)	20	1979677	1985263
arl6ip5	101476305	ADP ribosylation factor like GTPase 6 interacting protein 5(arl6ip5)	20	20465510	20469884
dcp1a	101476332	decapping mRNA 1A(dcp1a)	20	7638099	7646911
LOC101476346	101476346	P2Y purinoceptor 1(LOC101476346)	20	15500743	15502491
LOC101476347	101476347	uncharacterized LOC101476347(LOC101476347)	20	13911112	13915094
LOC101476403	101476403	proline-rich transmembrane protein 3(LOC101476403)	20	17281920	17298323
LOC101476404	101476404	sterile alpha motif domain containing 10a(samd10a)	20	21628053	21642774
fam3a	101476459	FAM3 metabolism regulating signaling molecule A(fam3a)	20	3062969	3069030
nsfl1c	101476488	NSFL1 (p97) cofactor (p47)(nsfl1c)	20	12932484	12940481
LOC101476551	101476551	protein Wnt-2b-A(LOC101476551)	20	1495197	1511102
LOC101476552	101476552	uncharacterized LOC101476552(zgc:174906)	20	1889663	1893584
LOC101476589	101476589	NEDD8-activating enzyme E1 catalytic subunit(LOC101476589)	20	20470702	20475713
spsb1	101476629	splA/ryanodine receptor domain and SOCS box containing 1(spsb1)	20	4346931	4356209
LOC101476645	101476645	6-phosphofructo-2-kinase/fructose-2,6-biphosphatase 1(pfkfb1)	20	15456895	15467447
LOC101476646	101476646	protein tyrosine phosphatase non-receptor type 22(ptpn22)	20	13915187	13929555
LOC101476695	101476695	uridine-cytidine kinase 1-like 1a(uckl1a)	20	21642908	21662647
wnk3	101476745	WNK lysine deficient protein kinase 3(si:dkey-151g10.3)	20	3021082	3061158
tkt	101476820	transketolase(tkt)	20	7621513	7634524
LOC101476830	101476830	FKBP prolyl isomerase like(fkbpl)	20	1475502	1479138
LOC101476831	101476831	putative helicase mov-10-B.2(LOC101476831)	20	1532888	1547872
LOC101476872	101476872	cytosolic sulfotransferase 3-like(LOC101476872)	20	17320112	17324503
lsm14b	101476873	LSM family member 14B(lsm14b)	20	18442365	18445848
slc25a33	101476904	solute carrier family 25 member 33(slc25a33)	20	4335607	4343061
LOC101476936	101476936	FKBP prolyl isomerase 1Ab(fkbp1ab)	20	12921166	12930507
LOC101477062	101477062	protein FAM19A4(LOC101477062)	20	20476651	20485281
LOC101477107	101477107	uncharacterized oxidoreductase At1g06690, chloroplastic(LOC101477107)	20	7613536	7618733
LOC101477116	101477116	TEA domain family member 3 a(tead3a)	20	1257092	1273512
taf4	101477158	TATA-box binding protein associated factor 4(taf4)	20	18446550	18460151
zmynd12	101477187	zinc finger, MYND-type containing 12(zmynd12)	20	6180094	6187662
LOC101477188	101477188	uncharacterized LOC101477188(LOC101477188)	20	4323337	4331170
LOC101477225	101477225	syndecan binding protein (syntenin) 2(sdcbp2)	20	12877922	12907178
LOC101477279	101477279	OTU deubiquitinase 3(otud3)	20	10486856	10492575
ebp	101477298	EBP cholestenol delta-isomerase(ebp)	20	1466920	1469051
LOC101477303	101477303	GDP dissociation inhibitor 1(gdi1)	20	15436869	15445310
LOC101477339	101477339	protein FAM19A1(LOC101477339)	20	20492746	20524632
LOC101477341	101477341	uncharacterized LOC101477341(si:dkey-70p6.1)	20	21663588	21685861
LOC101477390	101477390	patatin-like phospholipase domain-containing protein 2(LOC101477390)	20	1181108	1182797
LOC101477396	101477396	membrane cofactor protein(LOC101477396)	20	13883103	13896058
LOC101477475	101477475	ribosomal modification protein rimK-like family member A(rimkla)	20	6187757	6206138
emd	101477476	emerin (Emery-Dreifuss muscular dystrophy)(emd)	20	4314296	4321270
snph	101477513	syntaphilin b(snphb)	20	12844728	12870440
spryd4	101477571	SPRY domain containing 4(spryd4)	20	19493240	19496382
nsun5	101477574	NOP2/Sun RNA methyltransferase 5(nsun5)	20	7610301	7613368
ccdc115	101477583	coiled-coil domain containing 115(ccdc115)	20	1462823	1465500
itih6	101477585	inter-alpha-trypsin inhibitor heavy chain family member 6(itih6)	20	15445391	15456724
LOC101477622	101477622	cadherin-4(LOC101477622)	20	18485949	18724901
tmem240	101477747	transmembrane protein 240a(tmem240a)	20	10496887	10512600
LOC101477753	101477753	epithelial membrane protein 3(LOC101477753)	20	6177287	6179883
LOC101477754	101477754	high mobility group nucleosome-binding domain-containing protein 5(si:dkey-183p4.10)	20	4310066	4313345
LOC101477818	101477818	uncharacterized protein At5g50100, chloroplastic(LOC101477818)	20	20555602	20558593
LOC101477820	101477820	sodium/potassium transporting ATPase interacting 5(nkain5)	20	21698785	21706996
LOC101477861	101477861	v-myb avian myeloblastosis viral oncogene homolog-like 2a(mybl2a)	20	7576365	7596822
LOC101477867	101477867	zinc finger BED domain-containing protein 4(si:dkey-109j17.5)	20	1457742	1462396
LOC101477871	101477871	V-type proton ATPase subunit S1(LOC101477871)	20	15429686	15435364
LOC101477967	101477967	ERC protein 2(LOC101477967)	20	450356	611431
LOC101478011	101478011	cytosolic sulfotransferase 2(LOC101478011)	20	17306703	17312216
LOC101478036	101478036	succinate dehydrogenase [ubiquinone] iron-sulfur subunit, mitochondrial(LOC101478036)	20	10534657	10537920
znf362	101478041	zinc finger protein 362b(znf362b)	20	6161518	6172780
LOC101478097	101478097	monocarboxylate transporter 2(LOC101478097)	20	20550303	20558234
LOC101478099	101478099	YTH N(6)-methyladenosine RNA binding protein 1(ythdf1)	20	21707876	21717257
phf8	101478139	PHD finger protein 8(phf8)	20	3007732	3019668
LOC101478140	101478140	hemicentin-1(LOC101478140)	20	1442935	1454467
pifo	101478142	primary cilia formation(pifo)	20	15425027	15429288
LOC101478241	101478241	parapinopsin-like(LOC101478241)	20	163673	166295
uckl1	101478287	uridine-cytidine kinase 1-like 1b(uckl1b)	20	15993581	16010412
LOC101478311	101478311	SUZ RNA binding domain containing 1(szrd1)	20	10557513	10562170
sgk2	101478315	serum/glucocorticoid regulated kinase 2a(sgk2a)	20	7559053	7572234
LOC101478378	101478378	potassium channel, subfamily K, member 15(kcnk15)	20	18968931	18971192
taf8	101478420	TAF8 RNA polymerase II, TATA box binding protein (TBP)-associated factor(taf8)	20	15419535	15425023
LOC101478504	101478504	TRAF3-interacting JNK-activating modulator(LOC101478504)	20	4300454	4305891
l1cam	101478519	L1 cell adhesion molecule, paralog a(l1cama)	20	2896181	2942537
LOC101478562	101478562	calcium-independent phospholipase A2-gamma(LOC101478562)	20	20560010	20566030
LOC101478563	101478563	glucose-induced degradation protein 8 homolog(LOC101478563)	20	21732874	21738190
atp13a2	101478591	ATPase cation transporting 13A2(atp13a2)	20	10540382	10557553
LOC101478651	101478651	opioid growth factor receptor(ogfr)	20	18978664	18986599
g0s2	101478705	G0/G1 switch 2(g0s2)	20	15418297	15419175
LOC101478706	101478706	CD34 molecule(cd34)	20	13838725	13854097
atp5pb	101478780	ATP synthase peripheral stalk-membrane subunit b(atp5pb)	20	4294811	4299932
LOC101478792	101478792	apolipoprotein B mRNA editing enzyme, catalytic polypeptide-like 2b(apobec2b)	20	1453782	1456399
LOC101478839	101478839	cytosolic sulfotransferase 2-like(LOC101478839)	20	17298355	17304210
LOC101478840	101478840	neurofascin homolog (chicken) b(nfascb)	20	20566108	20586031
col9a3	101478931	collagen, type IX, alpha 3(col9a3)	20	18990278	19006388
LOC101478974	101478974	L3MBTL histone methyl-lysine binding protein 1(l3mbtl1)	20	7538932	7554111
LOC101478990	101478990	calcium/calmodulin-dependent protein kinase IGb(camk1gb)	20	15404294	15415630
plxna2	101478991	plexin A2(plxna2)	20	23010813	23171322
LOC101479030	101479030	solute carrier family 17 member 9(LOC101479030)	20	21721480	21732773
LOC101479071	101479071	EPS8-like 3b(eps8l3b)	20	4283494	4294555
LOC101479080	101479080	myosin binding protein Ha(mybpha)	20	1420511	1440564
LOC101479156	101479156	tumor necrosis factor receptor superfamily member 1A(si:ch211-112c15.8)	20	6126955	6139757
tcfl5	101479216	transcription factor like 5(tcfl5)	20	19006568	19011355
LOC101479267	101479267	microtubule associated monooxygenase, calponin and LIM domain containing 1(mical1)	20	15375731	15398751
zbtb46	101479304	zinc finger and BTB domain containing 46(zbtb46)	20	16029162	16092547
LOC101479305	101479305	cytosolic sulfotransferase 1(LOC101479305)	20	17406506	17417583
ribc1	101479355	RIB43A domain with coiled-coils 1(ribc1)	20	2891139	2896079
LOC101479356	101479356	cysteine and glycine-rich protein 1a(csrp1a)	20	1324684	1333814
LOC101479547	101479547	glutathione S-transferase Mu 3-like(LOC101479547)	20	4280250	4283351
LOC101479627	101479627	aminolevulinate, delta-, synthase 2(alas2)	20	6107627	6114609
smc1a	101479638	structural maintenance of chromosomes 1A(smc1a)	20	2878415	2891044
LOC101479639	101479639	neuron navigator 1(LOC101479639)	20	1340009	1420267
LOC101479642	101479642	uncharacterized protein C12orf81-like(LOC101479642)	20	22877400	22880273
LOC101479688	101479688	tripartite motif-containing protein 16-like(LOC101479688)	20	21740344	21743043
ajap1	101479697	adherens junctions associated protein 1(ajap1)	20	9307206	9367849
LOC101479745	101479745	v-src avian sarcoma (Schmidt-Ruppin A-2) viral oncogene homolog(src)	20	15343415	15373840
LOC101479823	101479823	glutathione S-transferase Mu 3(LOC101479823)	20	4268889	4273332
LOC101479868	101479868	uncharacterized LOC101479868(si:ch73-181d5.4)	20	19011392	19043087
LOC101479870	101479870	chitotriosidase-1(LOC101479870)	20	20599080	20603991
LOC101479893	101479893	V-set and transmembrane domain-containing protein 2-like protein(LOC101479893)	20	10592133	10647588
LOC101479901	101479901	N-terminal EF-hand calcium-binding protein 1(LOC101479901)	20	6084151	6105426
cacna1s	101479917	calcium voltage-gated channel subunit alpha1 S(cacna1s)	20	2860162	2878051
slc2a4rg	101479971	SLC2A4 regulator(slc2a4rg)	20	16092755	16133546
LOC101479972	101479972	DnaJ (Hsp40) homolog, subfamily C, member 5aa(dnajc5aa)	20	21746462	21752294
gabrd	101479981	gamma-aminobutyric acid type A receptor subunit delta(gabrd)	20	9519585	9543874
LOC101480010	101480010	serine/arginine-rich splicing factor 6(LOC101480010)	20	7533868	7538807
wdr46	101480069	WD repeat domain 46(wdr46)	20	17419057	17437269
LOC101480121	101480121	pleckstrin homology-like domain, family A, member 3(phlda3)	20	1321029	1323463
slc26a9	101480125	solute carrier family 26 member 9(slc26a9)	20	22860682	22867706
mfsd4a	101480170	major facilitator superfamily domain containing 4Ab(mfsd4ab)	20	20647656	20650726
LOC101480195	101480195	TELO2-interacting protein 1 homolog(LOC101480195)	20	10575339	10576668
LOC101480204	101480204	large neutral amino acids transporter small subunit 1(LOC101480204)	20	6063680	6075038
LOC101480270	101480270	tumor protein D54(LOC101480270)	20	21754568	21761509
eif2s2	101480306	eukaryotic translation initiation factor 2, subunit 2 beta(eif2s2)	20	7524868	7529949
LOC101480307	101480307	adenosine monophosphate deaminase 2b(ampd2b)	20	4228647	4248448
tmem9	101480412	transmembrane protein 9(tmem9)	20	2855521	2859431
LOC101480413	101480413	troponin I type 1a (skeletal, slow)(tnni1a)	20	1309543	1314132
LOC101480417	101480417	solute carrier family 48 member 1a(slc48a1a)	20	22855760	22859221
LOC101480464	101480464	uncharacterized LOC101480464(LOC101480464)	20	16136745	16181385
LOC101480466	101480466	CMRF35-like molecule 3(LOC101480466)	20	20662414	20664230
cfap74	101480471	cilia and flagella associated protein 74(cfap74)	20	9546556	9600576
LOC101480537	101480537	scavenger receptor cysteine-rich type 1 protein M130(LOC101480537)	20	13810719	13813022
b3galt4	101480560	UDP-Gal:betaGlcNAc beta 1,3-galactosyltransferase, polypeptide 4(b3galt4)	20	17438685	17439800
LOC101480694	101480694	TOX high mobility group box family member 2(LOC101480694)	20	5973900	6059603
LOC101480705	101480705	complement component 1, q subcomponent-like 4(c1ql4a)	20	2826817	2836622
lad1	101480706	ladinin(lad1)	20	1301730	1308698
LOC101480709	101480709	integrin, alpha 5 (fibronectin receptor, alpha polypeptide)(itga5)	20	22791354	22827361
LOC101480753	101480753	protein kinase C-binding protein 1(LOC101480753)	20	19049200	19065183
LOC101480754	101480754	cell division control protein 42 homolog(LOC101480754)	20	20668989	20673906
LOC101480787	101480787	charged multivesicular body protein 4b(LOC101480787)	20	7517477	7523089
kcng1	101480804	potassium voltage-gated channel, subfamily G, member 1(kcng1)	20	15329560	15341204
col20a1	101480832	collagen type XX alpha 1 chain(col20a1)	20	13181600	13226580
nr2c2	101480850	nuclear receptor subfamily 2, group C, member 2(nr2c2)	20	17448447	17460163
LOC101480936	101480936	pancreatic progenitor cell differentiation and proliferation factor A(LOC101480936)	20	21764316	21766761
gnb1	101480944	guanine nucleotide binding protein (G protein), beta polypeptide 1a(gnb1a)	20	9606436	9637948
LOC101480989	101480989	uncharacterized LOC101480989(zgc:153867)	20	2818808	2824222
LOC101480990	101480990	troponin T type 2a (cardiac)(tnnt2a)	20	1293594	1301396
LOC101480994	101480994	Rap guanine nucleotide exchange factor (GEF) 3(rapgef3)	20	22827665	22854230
ncoa3	101481031	nuclear receptor coactivator 3(ncoa3)	20	19093885	19158220
gnas	101481065	GNAS complex locus(gnas)	20	7480395	7504603
LOC101481109	101481109	neurotensin receptor type 1(LOC101481109)	20	12655049	12707172
LOC101481171	101481171	spermatogenesis associated serine rich 2(spats2)	20	22288036	22308270
LOC101481233	101481233	F-box only protein 6(LOC101481233)	20	20677145	20683048
nol4l	101481235	nucleolar protein 4-like a(nol4la)	20	21774129	21808174
pkp1	101481283	plakophilin 1(pkp1)	20	1277280	1292129
LOC101481288	101481288	nuclear factor of activated T cells 2a(nfatc2a)	20	15281561	15300307
LOC101481334	101481334	baculoviral IAP repeat containing 7(birc7)	20	16238905	16242471
LOC101481335	101481335	major intrinsic protein of lens fiber b(mipb)	20	19192442	19195238
LOC101481364	101481364	vesicle-associated membrane protein-associated protein B(LOC101481364)	20	7507258	7517021
LOC101481365	101481365	coiled-coil domain containing 30(ccdc30)	20	5926810	5941616
pym1	101481461	PYM homolog 1, exon junction complex associated factor(pym1)	20	22282937	22286097
csrnp2	101481472	cysteine-serine-rich nuclear protein 2(csrnp2)	20	22753837	22762855
LOC101481520	101481520	DNA (cytosine-5-)-methyltransferase 3 beta, duplicate a(dnmt3ba)	20	21832213	21860023
LOC101481561	101481561	guanine nucleotide binding protein (G protein), alpha transducing activity polypeptide 2(gnat2)	20	4213707	4219608
LOC101481616	101481616	sodium/potassium transporting ATPase interacting 4(nkain4)	20	16185354	16238731
mrps25	101481617	mitochondrial ribosomal protein S25(mrps25)	20	17463744	17467216
LOC101481619	101481619	RNA binding motif protein 38(rbm38)	20	19159932	19191018
nadk	101481624	NAD kinase a(nadka)	20	9640812	9657610
neurod4	101481676	neuronal differentiation 4(neurod4)	20	2805702	2808577
LOC101481755	101481755	matrix metalloproteinase-19(LOC101481755)	20	22276460	22279077
LOC101481766	101481766	transcription factor Spi-B-like(LOC101481766)	20	1232222	1237957
tfcp2	101481770	transcription factor CP2(tfcp2)	20	22739350	22753600
atp5f1e	101481842	ATP synthase F1 subunit epsilon(atp5f1e)	20	7438533	7440097
LOC101481843	101481843	guanine nucleotide binding protein (G protein), alpha inhibiting activity polypeptide 3(gnai3)	20	4192378	4213604
rbsn	101481902	rabenosyn, RAB effector(rbsn)	20	17467312	17476039
LOC101481904	101481904	aquaporin AQPAe.a-like(LOC101481904)	20	19196766	19202993
LOC101481906	101481906	DnaJ (Hsp40) homolog, subfamily C, member 11a(dnajc11a)	20	20686312	20694528
LOC101481914	101481914	uncharacterized LOC101481914(LOC101481914)	20	9660314	9674958
LOC101481959	101481959	baculoviral IAP repeat containing 5b(birc5b)	20	2798632	2800955
LOC101481998	101481998	oxysterol-binding protein-related protein 2(LOC101481998)	20	21886497	21904948
LOC101482041	101482041	transmembrane protein 198(LOC101482041)	20	22266727	22273304
LOC101482099	101482099	YTH domain-containing family protein 1(LOC101482099)	20	16243420	16252552
LOC101482146	101482146	G protein-coupled receptor 61(gpr61)	20	4182579	4186651
LOC101482250	101482250	zinc finger protein 385A(znf385a)	20	2738853	2791248
LOC101482294	101482294	uncharacterized LOC101482294(si:ch211-197l9.2)	20	21864367	21878172
LOC101482326	101482326	PRELI domain containing protein 3B(LOC101482326)	20	7430078	7434682
slc13a3	101482327	solute carrier family 13 member 3(slc13a3)	20	22222639	22235073
atp9a	101482344	ATPase phospholipid transporting 9A (putative)(atp9a)	20	15239372	15274494
bhlhe23	101482392	basic helix-loop-helix family, member e23(bhlhe23)	20	16312547	16314351
ptges3	101482393	prostaglandin E synthase 3b (cytosolic)(ptges3b)	20	19226730	19232146
LOC101482394	101482394	calmodulin binding transcription activator 1a(camta1a)	20	20696200	20980234
slc35e2b	101482398	solute carrier family 35 member E2B(slc35e2b)	20	9678226	9685836
pigt	101482443	phosphatidylinositol glycan anchor biosynthesis, class T(pigt)	20	5862319	5874679
LOC101482444	101482444	adhesion molecule with Ig-like domain 1(amigo1)	20	4154354	4160336
pou6f1	101482461	POU class 6 homeobox 1(pou6f1)	20	22724765	22737039
trh	101482499	thyrotropin-releasing hormone(trh)	20	17477914	17479669
LOC101482586	101482586	proteasomal ubiquitin receptor ADRM1(LOC101482586)	20	21907430	21924308
LOC101482612	101482612	BPI fold containing family C, like(bpifcl)	20	7423025	7428706
sall4	101482630	spalt-like transcription factor 4(sall4)	20	15229780	15237095
slc17a9	101482676	solute carrier family 17 member 9b(slc17a9b)	20	16339440	16351554
prim1	101482678	DNA primase subunit 1(prim1)	20	19247415	19255908
sycp2	101482726	synaptonemal complex protein 2(sycp2)	20	5809521	5826905
LOC101482727	101482727	synaptophysin-like 2b(sypl2b)	20	4141131	4144557
LOC101482738	101482738	core 1 synthase, glycoprotein-N-acetylgalactosamine 3-beta-galactosyltransferase, 1a(c1galt1a)	20	2700223	2707458
tmcc1	101482782	transmembrane and coiled-coil domain family 1a(tmcc1a)	20	17527374	17574669
LOC101482878	101482878	CDK5 and ABL1 enzyme substrate 2(LOC101482878)	20	21925855	21936420
LOC101482923	101482923	vesicular inhibitory amino acid transporter(LOC101482923)	20	7418686	7422352
zfp64	101482937	zinc finger protein 64 homolog (mouse)(zfp64)	20	15202750	15207691
LOC101482984	101482984	glucose-induced degradation protein 8 homolog(LOC101482984)	20	16355143	16357895
LOC101482985	101482985	rho-related GTP-binding protein Rho6(LOC101482985)	20	19263946	19275433
LOC101483020	101483020	phosphatase and actin regulator 3a(phactr3a)	20	5826961	5861525
slc25a45	101483070	solute carrier family 25 member 45(slc25a45)	20	9686750	9695548
lgr6	101483109	leucine rich repeat containing G protein-coupled receptor 6(lgr6)	20	1199825	1222328
dazap2	101483113	DAZ associated protein 2(dazap2)	20	22719845	22722810
actr5	101483206	actin related protein 5(actr5)	20	7402418	7408508
LOC101483207	101483207	sortilin 1b(sort1b)	20	4117083	4133303
dnah12	101483270	dynein, axonemal, heavy chain 12(dnah12)	20	16358663	16384588
ddx23	101483271	DEAD (Asp-Glu-Ala-Asp) box polypeptide 23(ddx23)	20	19284968	19294042
LOC101483339	101483339	XK, Kell blood group complex subunit-related family, member 7a(xkr7a)	20	21942045	21949249
gypc	101483398	glycophorin C (Gerbich blood group)(gypc)	20	22711743	22716471
LOC101483491	101483491	NDUFA4 mitochondrial complex associated like 2a(ndufa4l2a)	20	7390561	7399931
nfya	101483492	nuclear transcription factor Y, alpha, like(nfyal)	20	4107144	4114222
LOC101483501	101483501	beta-1,4-N-acetyl-galactosaminyl transferase 1a(b4galnt1a)	20	2652500	2675131
LOC101483549	101483549	ankyrin repeat and SOCS box containing 14b(asb14b)	20	16385634	16388852
cacnb3	101483550	calcium voltage-gated channel auxiliary subunit beta 3(cacnb3)	20	19296663	19322965
znf335	101483586	zinc finger protein 335(znf335)	20	3882869	3894919
ube2t	101483587	ubiquitin-conjugating enzyme E2T (putative)(ube2t)	20	1195296	1199726
LOC101483640	101483640	ras-related protein Rap-1A(LOC101483640)	20	21952814	21973554
LOC101483687	101483687	protein phosphatase 1, regulatory subunit 3Da(ppp1r3da)	20	5805641	5807150
LOC101483708	101483708	uncharacterized LOC101483708(si:ch211-210c8.6)	20	22701971	22704889
LOC101483752	101483752	spen family transcriptional repressor(spen)	20	9717687	9745466
LOC101483798	101483798	solute carrier family 26 member 10(slc26a10)	20	2640373	2647274
tshz2	101483800	teashirt zinc finger homeobox 2(tshz2)	20	15100343	15139864
adcy6	101483853	adenylate cyclase 6(adcy6)	20	19330985	19386652
mmp9	101483885	matrix metallopeptidase 9(mmp9)	20	3877604	3881990
LOC101483974	101483974	family with sequence similarity 217 member Ba(fam217ba)	20	5801569	5805442
LOC101483991	101483991	bridging integrator 2a(bin2a)	20	22703416	22710166
LOC101484024	101484024	transcription activation suppressor b(tasorb)	20	16390388	16404780
LOC101484025	101484025	urotensin-2-like(LOC101484025)	20	20980688	20982118
LOC101484028	101484028	uncharacterized LOC101484028(LOC101484028)	20	9705821	9761405
LOC101484072	101484072	ETS variant transcription factor 7(etv7)	20	1185949	1191408
LOC101484151	101484151	adenosine A1 receptor b(adora1b)	20	3858481	3863542
plxnd1	101484205	plexin D1(plxnd1)	20	17576525	17648315
LOC101484251	101484251	serine hydroxymethyltransferase, mitochondrial(LOC101484251)	20	7377645	7385846
ttll9	101484252	tubulin tyrosine ligase-like family, member 9(ttll9)	20	5797493	5801322
znf217	101484271	zinc finger protein 217(znf217)	20	15052251	15058984
racgap1	101484272	Rac GTPase activating protein 1(racgap1)	20	22690889	22701062
LOC101484311	101484311	coiled-coil domain containing 187(ccdc187)	20	20986884	21004245
LOC101484312	101484312	lysine (K)-specific demethylase 5Bb(kdm5bb)	20	21985432	22009768
LOC101484343	101484343	Sp5 transcription factor-like(sp5l)	20	2613665	2616203
LOC101484387	101484387	glucose-6-phosphate 1-dehydrogenase(LOC101484387)	20	19397659	19410572
dclre1b	101484429	DNA cross-link repair 1B(dclre1b)	20	3825614	3830118
amigo3	101484475	adhesion molecule with Ig like domain 3(amigo3)	20	16408700	16417441
rho	101484476	rhodopsin(rho)	20	17648318	17653578
LOC101484518	101484518	kinesin family member 5A, a(kif5aa)	20	7306672	7326554
LOC101484519	101484519	endothelin-3(LOC101484519)	20	5771716	5779542
LOC101484534	101484534	inactive dipeptidyl peptidase 10(LOC101484534)	20	22664239	22690860
LOC101484609	101484609	Rho guanine nucleotide exchange factor (GEF) 25a(arhgef25a)	20	2570345	2612710
LOC101484659	101484659	glycerol-3-phosphate dehydrogenase [NAD(+)], cytoplasmic(LOC101484659)	20	19411348	19418158
LOC101484713	101484713	uncharacterized LOC101484713(zgc:194242)	20	1191418	1194134
mbd4	101484756	methyl-CpG binding domain protein 4(mbd4)	20	17681387	17684391
LOC101484757	101484757	tubulin alpha 5(tuba5)	20	22016447	22026170
LOC101484798	101484798	methyl-CpG binding domain protein 6(mbd6)	20	7327278	7344673
LOC101484799	101484799	band 4.1-like protein 1(si:dkey-178k16.1)	20	5708709	5756612
mad2l2	101484853	mitotic arrest deficient 2 like 2(mad2l2)	20	9700190	9705167
LOC101484945	101484945	metabotropic glutamate receptor 7(LOC101484945)	20	16450912	16531977
LOC101484947	101484947	acid-sensing ion channel 1(LOC101484947)	20	19421977	19487623
dvl1	101484949	dishevelled segment polarity protein 1a(dvl1a)	20	21011092	21035227
ankrd52	101485004	ankyrin repeat domain 52a(ankrd52a)	20	22612393	22633350
ift122	101485039	intraflagellar transport 122 homolog (Chlamydomonas)(ift122)	20	17654122	17681293
ptpn1	101485042	protein tyrosine phosphatase non-receptor type 1(ptpn1)	20	22049927	22067115
LOC101485081	101485081	contactin 3a, tandem duplicate 1(cntn3a.1)	20	5627260	5706568
LOC101485096	101485096	copine Va(cpne5a)	20	3713705	3809564
bcas1	101485098	brain enriched myelin associated protein 1(bcas1)	20	15031843	15046988
LOC101485153	101485153	eph receptor A2 b(epha2b)	20	9767556	9790455
LOC101485248	101485248	dystroglycan(LOC101485248)	20	16543437	16555470
LOC101485252	101485252	tumor necrosis factor receptor superfamily, member 9a(tnfrsf9a)	20	21006120	21010884
stac3	101485287	SH3 and cysteine rich domain 3(stac3)	20	7345236	7351735
LOC101485297	101485297	coenzyme Q10A(coq10a)	20	22634829	22639872
LOC101485334	101485334	uncharacterized LOC101485334(LOC101485334)	20	17684759	17686628
klhl12	101485336	kelch like family member 12(klhl12)	20	22034157	22049846
LOC101485468	101485468	potassium voltage-gated channel subfamily A member 10(LOC101485468)	20	1148541	1163950
LOC101485520	101485520	glutaminase 2a (liver, mitochondrial)(gls2a)	20	19496631	19518267
LOC101485553	101485553	uncharacterized LOC101485553(LOC101485553)	20	7267204	7294353
LOC101485554	101485554	neural cell adhesion molecule L1-like protein(LOC101485554)	20	5518744	5567359
LOC101485563	101485563	mitogen-activated protein kinase 14a(mapk14a)	20	3645370	3665116
LOC101485610	101485610	uncharacterized LOC101485610(wu:fl23c11)	20	17699047	17708266
LOC101485616	101485616	family with sequence similarity 131 member C(fam131c)	20	9801987	9820242
ngrn	101485641	neugrin, neurite outgrowth associated(ngrn)	20	4114536	4115919
LOC101485653	101485653	ankyrin repeat domain 33Aa(ankrd33aa)	20	2558455	2564438
LOC101485756	101485756	potassium voltage-gated channel, shaker-related subfamily, member 2b(kcna2b)	20	1133539	1140254
LOC101485799	101485799	collagen alpha-1(II) chain(LOC101485799)	20	19525409	19549018
rprd1b	101485827	regulation of nuclear pre-mRNA domain containing 1B(rprd1b)	20	7255126	7261274
LOC101485878	101485878	poly(rC)-binding protein 4(LOC101485878)	20	16560991	16605104
LOC101485880	101485880	matrix remodeling-associated protein 8(LOC101485880)	20	21036022	21047730
ahcyl1	101485913	adenosylhomocysteinase-like 1(ahcyl1)	20	4088297	4105182
LOC101485924	101485924	activin A receptor type 1Ba(acvr1ba)	20	2526776	2541998
pfdn4	101485930	prefoldin subunit 4(pfdn4)	20	15023004	15030338
LOC101485975	101485975	CCAAT enhancer binding protein beta(cebpb)	20	22082829	22084382
zgpat	101485999	zinc finger, CCCH-type with G patch domain(zgpat)	20	10144029	10151501
LOC101486029	101486029	UDP-GlcNAc:betaGal beta-1,3-N-acetylglucosaminyltransferase 7, like(b3gnt7l)	20	8817225	8819371
LOC101486031	101486031	contactin 3a, tandem duplicate 2(cntn3a.2)	20	5458994	5503547
LOC101486042	101486042	potassium voltage-gated channel subfamily A member 3(LOC101486042)	20	1120687	1125494
LOC101486096	101486096	chloride channel K(clcnk)	20	9822707	9843154
LOC101486234	101486234	activin A receptor like type 1(acvrl1)	20	2544782	2555081
LOC101486240	101486240	probable N-acetyltransferase camello(LOC101486240)	20	14977905	14979619
LOC101486281	101486281	uncharacterized LOC101486281(LOC101486281)	20	17712369	17723309
LOC101486282	101486282	mitogen-activated protein kinase kinase kinase 12(map3k12)	20	19558080	19572222
LOC101486284	101486284	plasmanylethanolamine desaturase 1(peds1)	20	22089821	22098687
LOC101486300	101486300	cholinergic receptor, nicotinic, alpha 4b(chrna4b)	20	10151496	10167199
lg20h1orf174	101486327	linkage group 20 C1orf174 homolog(lg20h1orf174)	20	8821988	8825507
LOC101486328	101486328	hairy-related 12(her12)	20	7245701	7246780
exosc10	101486329	exosome component 10(exosc10)	20	5444779	5456985
LOC101486340	101486340	nerve growth factor a (beta polypeptide)(ngfa)	20	1020046	1043218
rnf41	101486347	ring finger protein 41(rnf41)	20	22603978	22608847
hspb7	101486387	heat shock protein family, member 7 (cardiovascular)(hspb7)	20	9855200	9858659
LOC101486419	101486419	heat shock protein family A (Hsp70) member 1B(hspa1b)	20	4085292	4087949
kmt2d	101486529	lysine (K)-specific methyltransferase 2D(kmt2d)	20	2492710	2523991
cbln4	101486533	cerebellin 4 precursor(cbln4)	20	14925113	14931450
LOC101486574	101486574	ssu-2 homolog, related sequence 1(ssuh2rs1)	20	16689931	16695639
brpf1	101486575	bromodomain and PHD finger containing, 1(brpf1)	20	17728790	17739608
aurkaip1	101486576	aurora kinase A interacting protein 1(aurkaip1)	20	21048271	21051454
slc52a3	101486578	solute carrier family 52 member 3(slc52a3)	20	22116054	22122304
LOC101486618	101486618	transcription factor HES-5(LOC101486618)	20	7239812	7241499
srm	101486619	spermidine synthase(srm)	20	5432103	5435094
lg20h1orf194	101486628	cilia and flagella associated protein 276(cfap276)	20	3631070	3633640
LOC101486629	101486629	tetraspanin-2(LOC101486629)	20	1003463	1014701
LOC101486636	101486636	diacylglycerol kinase, alpha a(dgkaa)	20	22581331	22599349
zbtb17	101486678	zinc finger and BTB domain containing 17(zbtb17)	20	9859526	9869553
kcnc4	101486708	potassium voltage-gated channel, Shaw-related subfamily, member 4(kcnc4)	20	4058013	4083715
LOC101486775	101486775	potassium voltage-gated channel subfamily KQT member 2(LOC101486775)	20	10195871	10242035
dhh	101486812	desert hedgehog signaling molecule(dhh)	20	2484335	2489703
LOC101486857	101486857	scratch family zinc finger 2(scrt2)	20	22161258	22170394
LOC101486892	101486892	somatostatin family member 7(sst7)	20	5428588	5429737
LOC101486902	101486902	mitochondrial glutamate carrier 1(LOC101486902)	20	998066	1002588
grasp	101486910	trafficking regulator and scaffold protein tamalin(tamalin)	20	22570006	22580142
aaas	101486952	achalasia, adrenocortical insufficiency, alacrimia(aaas)	20	19550413	19559057
ddost	101486961	dolichyl-diphosphooligosaccharide--protein glycosyltransferase subunit (non-catalytic)(ddost)	20	9869849	9874290
dffb	101486992	DNA fragmentation factor, beta polypeptide (caspase-activated DNase)(dffb)	20	8825613	8828996
slc6a17	101486993	solute carrier family 6 member 17(slc6a17)	20	4021523	4045791
rpl32	101487048	ribosomal protein L32(rpl32)	20	16695722	16698892
LOC101487050	101487050	rap1 GTPase-activating protein 1(LOC101487050)	20	21054528	21095995
kiaa1324	101487099	endosome-lysosome associated apoptosis and autophagy regulator 1(elapor1)	20	3633561	3644002
LOC101487100	101487100	IKAROS family zinc finger 4(ikzf4)	20	2454931	2462157
srxn1	101487142	sulfiredoxin 1 homolog (S. cerevisiae)(srxn1)	20	22177568	22179238
ubr4	101487176	ubiquitin protein ligase E3 component n-recognin 4(ubr4)	20	7181136	7236078
masp2	101487177	MBL associated serine protease 2(masp2)	20	5405219	5408808
LOC101487191	101487191	CD40 molecule, TNF receptor superfamily member 5(cd40)	20	14848373	14855001
wnk2	101487235	WNK lysine deficient protein kinase 2(LOC101487235)	20	17740027	17780708
plekhm2	101487243	pleckstrin homology domain containing, family M (with RUN domain) member 2(plekhm2)	20	9874814	9893633
prex1	101487250	phosphatidylinositol-3,4,5-trisphosphate-dependent Rac exchange factor 1(prex1)	20	10243345	10321413
LOC101487277	101487277	L-rhamnose-binding lectin SML(LOC101487277)	20	8762063	8775126
alx3	101487278	ALX homeobox 3(alx3)	20	3990032	3995223
LOC101487336	101487336	glutamate receptor-interacting protein 2(LOC101487336)	20	16700521	16733608
LOC101487391	101487391	CaM kinase-like vesicle-associated, like(camkvl)	20	939156	985059
LOC101487394	101487394	nuclear receptor subfamily 4, group A, member 1(nr4a1)	20	22544856	22549197
LOC101487433	101487433	poly(rC)-binding protein 2(LOC101487433)	20	19573352	19579964
tcf15	101487434	transcription factor 15(tcf15)	20	22188272	22189598
plekhg5	101487484	pleckstrin homology domain containing, family G (with RhoGef domain) member 5b(plekhg5b)	20	14727975	14806530
casp9	101487562	caspase 9, apoptosis-related cysteine peptidase(casp9)	20	8756768	8759791
rbm15	101487563	RNA binding motif protein 15(rbm15)	20	3982530	3987332
emc1	101487655	ER membrane protein complex subunit 1(emc1)	20	7168795	7180172
dffa	101487656	DNA fragmentation factor, alpha polypeptide(dffa)	20	5396189	5402701
LOC101487677	101487677	uncharacterized LOC101487677(zgc:195245)	20	3611177	3615459
uba1	101487678	ubiquitin-like modifier activating enzyme 1(uba1)	20	922579	938734
LOC101487681	101487681	uncharacterized LOC101487681(zgc:56699)	20	22531954	22534751
LOC101487727	101487727	anoctamin 11(ano11)	20	9893718	9912248
ralgapb	101487743	Ral GTPase activating protein non-catalytic subunit beta(ralgapb)	20	10322605	10342802
dnajc22	101487769	DnaJ (Hsp40) homolog, subfamily C, member 22(dnajc22)	20	2462261	2464230
slc16a4	101487851	solute carrier family 16 member 4(slc16a4)	20	3953683	3978913
casz1	101487947	castor zinc finger 1(casz1)	20	5254421	5326884
inava	101487960	innate immunity activator a(inavaa)	20	3600855	3609820
LOC101488045	101488045	monocarboxylate transporter 1(LOC101488045)	20	24962850	24992597
LOC101488122	101488122	ERBB receptor feedback inhibitor 1(LOC101488122)	20	7160470	7168220
lamtor5	101488123	late endosomal/lysosomal adaptor, MAPK and MTOR activator 5(lamtor5)	20	3936166	3940817
LOC101488135	101488135	Rho guanine nucleotide exchange factor (GEF) 3, like(arhgef3l)	20	916854	922065
cd63	101488138	CD63 molecule(cd63)	20	22512779	22522373
LOC105940414	105940414	cytosolic sulfotransferase 3(LOC105940414)	20	17328899	17340661
LOC105940819	105940819	small integral membrane protein 29(smim29)	20	19971129	19975620
LOC105940822	105940822	ubiquitin-conjugating enzyme E2 variant 1(ube2v1)	20	22103684	22107973
lg20h6orf226	105940823	linkage group 20 C6orf226 homolog(lg20h6orf226)	20	21860240	21863061
LOC105940972	105940972	tumor necrosis factor receptor superfamily member 16-like(LOC105940972)	20	6154247	6158126
LOC105940974	105940974	uncharacterized LOC105940974(LOC105940974)	20	7773485	7775334
LOC105940975	105940975	complement C1q-like protein 4(LOC105940975)	20	6774644	6781472
LOC105941080	105941080	uncharacterized LOC105941080(LOC105941080)	20	2128533	2139618
LOC105941123	105941123	uncharacterized LOC105941123(LOC105941123)	20	15641666	15644859
LOC105941124	105941124	tubulin alpha-1A chain(LOC105941124)	20	15761899	15782190
LOC105941125	105941125	uncharacterized LOC105941125(LOC105941125)	20	14801229	14848246
LOC105941246	105941246	olfactory receptor 142-like(LOC105941246)	20	13273855	13275027
LOC105941247	105941247	uncharacterized LOC105941247(LOC105941247)	20	12943328	12963491
LOC106674504	106674504	adenosine receptor A3(LOC106674504)	20	1238097	1240198
LOC106674600	106674600	uncharacterized LOC106674600(LOC106674600)	20	15331894	15335004
LOC106674601	106674601	PAN2-PAN3 deadenylation complex catalytic subunit PAN2-like(LOC106674601)	20	22405806	22411945
LOC106674602	106674602	P2Y purinoceptor 1-like(LOC106674602)	20	15532725	15533705
LOC106674608	106674608	uncharacterized LOC106674608(LOC106674608)	20	14197468	14199815
LOC106674624	106674624	RNA-directed DNA polymerase from mobile element jockey(LOC106674624)	20	8820158	8821839
LOC106674625	106674625	uncharacterized LOC106674625(LOC106674625)	20	6235075	6245946
LOC106674641	106674641	retrovirus-related Pol polyprotein from transposon 412(LOC106674641)	20	2677139	2681880
LOC106674848	106674848	trace amine-associated receptor 1-like(LOC106674848)	20	22330189	22331070
LOC106674983	106674983	uncharacterized LOC106674983(LOC106674983)	20	23723130	23728608
LOC106675029	106675029	uncharacterized LOC106675029(LOC106675029)	20	3726941	3738470
LOC106675032	106675032	uncharacterized LOC106675032(LOC106675032)	20	1730434	1731084
LOC106675119	106675119	uncharacterized LOC106675119(LOC106675119)	20	21693771	21695503
LOC106675341	106675341	uncharacterized LOC106675341(LOC106675341)	20	1096043	1098172
LOC106675689	106675689	uncharacterized LOC106675689(LOC106675689)	20	12091481	12092022
LOC106675752	106675752	keratin-associated protein 10-7-like(LOC106675752)	20	5897719	5921368
LOC106675782	106675782	uncharacterized LOC106675782(LOC106675782)	20	22600921	22602179
LOC106676345	106676345	acidic mammalian chitinase(LOC106676345)	20	20587429	20597413
LOC106676348	106676348	uncharacterized LOC106676348(LOC106676348)	20	17709787	17711186
LOC106676351	106676351	N-fatty-acyl-amino acid synthase/hydrolase PM20D1.2(LOC106676351)	20	20604266	20614695
LOC106676353	106676353	cytosolic sulfotransferase 3(LOC106676353)	20	17314797	17319065
LOC106676355	106676355	cytosolic sulfotransferase 3(LOC106676355)	20	17407818	17410013
LOC106676713	106676713	uncharacterized LOC106676713(LOC106676713)	20	21686511	21693455
LOC111500405	111500405	uncharacterized LOC111500405(LOC111500405)	20	13870078	13881950
LOC111500406	111500406	small nucleolar RNA SNORA2/SNORA34 family(LOC111500406)	20	15832333	15832467
prok1	111500408	prokineticin 1(prok1)	20	3928921	3930388
LOC111500410	111500410	uncharacterized LOC111500410(LOC111500410)	20	7879439	7881501
LOC111500412	111500412	neurexophilin-2(LOC111500412)	20	7371258	7377520
LOC111500413	111500413	U5 spliceosomal RNA(LOC111500413)	20	7368287	7368400
LOC111500414	111500414	U5 spliceosomal RNA(LOC111500414)	20	7357715	7357828
LOC111500417	111500417	U5 spliceosomal RNA(LOC111500417)	20	7355333	7355447
LOC111500418	111500418	U5 spliceosomal RNA(LOC111500418)	20	7362698	7362812
LOC111500419	111500419	U5 spliceosomal RNA(LOC111500419)	20	7367641	7367755
trnaa-agc	111500420	transfer RNA alanine (anticodon AGC)(trnaa-agc)	20	8748455	8748527
trnaa-agc	111500421	transfer RNA alanine (anticodon AGC)(trnaa-agc)	20	8747347	8747419
trnar-ccu	111500423	transfer RNA arginine (anticodon CCU)(trnar-ccu)	20	8287591	8287663
LOC111500661	111500661	uncharacterized LOC111500661(LOC111500661)	20	1240059	1246628
LOC111500662	111500662	5S ribosomal RNA(LOC111500662)	20	1761125	1761243
LOC111500663	111500663	small nucleolar RNA U6-53/MBII-28(LOC111500663)	20	924124	924245
LOC111500664	111500664	small Cajal body-specific RNA 2(LOC111500664)	20	3617297	3617658
trnac-gca	111500665	transfer RNA cysteine (anticodon GCA)(trnac-gca)	20	3202041	3202112
trnaf-gaa	111500666	transfer RNA phenylalanine (anticodon GAA)(trnaf-gaa)	20	1470401	1470473
trnah-gug	111500667	transfer RNA histidin (anticodon GUG)(trnah-gug)	20	1466336	1466407
trnac-gca	111500668	transfer RNA cysteine (anticodon GCA)(trnac-gca)	20	3101252	3101323
trnae-uuc	111500669	transfer RNA glutamic acid (anticodon UUC)(trnae-uuc)	20	1465855	1465926
trnac-gca	111500670	transfer RNA cysteine (anticodon GCA)(trnac-gca)	20	3186109	3186180
trnac-gca	111500671	transfer RNA cysteine (anticodon GCA)(trnac-gca)	20	3182544	3182615
LOC111500738	111500738	uncharacterized LOC111500738(LOC111500738)	20	12821074	12821387
LOC111500739	111500739	uncharacterized LOC111500739(LOC111500739)	20	12828129	12828379
LOC111501233	111501233	U6 spliceosomal RNA(LOC111501233)	20	9242429	9242533
LOC111501470	111501470	uncharacterized LOC111501470(LOC111501470)	20	16825482	16826711
LOC111501471	111501471	protein phosphatase 1 regulatory subunit 12B-like(LOC111501471)	20	20272715	20277847
tex49	111501473	testis expressed 49(tex49)	20	19389051	19391796
LOC111501474	111501474	small nucleolar RNA SNORA70(LOC111501474)	20	23364022	23364154
LOC111501475	111501475	small nucleolar RNA SNORA70(LOC111501475)	20	23361968	23362100
LOC111501476	111501476	small nucleolar RNA SNORD59(LOC111501476)	20	19237175	19237248
LOC111501477	111501477	small nucleolar RNA SNORD59(LOC111501477)	20	19236153	19236227
trnaa-ugc	111501478	transfer RNA alanine (anticodon UGC)(trnaa-ugc)	20	24237912	24237983
trnak-cuu	111501479	transfer RNA lysine (anticodon CUU)(trnak-cuu)	20	19065797	19065869
trnae-cuc	111501480	transfer RNA glutamic acid (anticodon CUC)(trnae-cuc)	20	21763689	21763760
LOC111501497	111501497	uncharacterized LOC111501497(LOC111501497)	20	1107724	1113275
trnaq-uug	111501715	transfer RNA glutamine (anticodon UUG)(trnaq-uug)	20	10891732	10891803
rbp7	112429683	retinol binding protein 7a, cellular(rbp7a)	20	5001926	5003318
LOC112429721	112429721	proteolipid protein 2b(plp2b)	20	21504383	21511597
LOC112429724	112429724	kazrin-A-like(LOC112429724)	20	6504535	6512133
LOC112429728	112429728	deoxyribonuclease I-like 1-like(dnase1l1l)	20	4308171	4310052
LOC112429769	112429769	complement receptor type 2-like(LOC112429769)	20	13896858	13905017
LOC112430101	112430101	pre-mRNA-splicing factor SPF27-like(LOC112430101)	20	10475984	10485672
LOC112430103	112430103	uncharacterized LOC112430103(LOC112430103)	20	9358059	9359933
LOC112430104	112430104	uncharacterized LOC112430104(LOC112430104)	20	13772525	13774047
LOC112430105	112430105	ammonium transporter Rh type B pseudogene(LOC112430105)	20	16870968	16872513
LOC112430108	112430108	uncharacterized LOC112430108(LOC112430108)	20	22937415	22938282
LOC112430109	112430109	uncharacterized LOC112430109(LOC112430109)	20	7785691	7790588
LOC112430110	112430110	histone H1-like(LOC112430110)	20	23625178	23626011
LOC112430114	112430114	uncharacterized LOC112430114(LOC112430114)	20	3903654	3911108
LOC112430115	112430115	uncharacterized LOC112430115(LOC112430115)	20	3915066	3916853
LOC112430118	112430118	uncharacterized LOC112430118(LOC112430118)	20	3902393	3902918
LOC112430119	112430119	U5 spliceosomal RNA(LOC112430119)	20	7358361	7358474
LOC112436623	112436623	gastrula zinc finger protein XlCGF8.2DB-like(LOC112436623)	20	11819704	11842392
LOC112436624	112436624	tonsoku-like protein(LOC112436624)	20	11845736	11848416
LOC112436625	112436625	uncharacterized LOC112436625(LOC112436625)	20	1741787	1742343
LOC112436626	112436626	uncharacterized LOC112436626(LOC112436626)	20	9460766	9461265
LOC112436628	112436628	trichohyalin-like(LOC112436628)	20	7586024	7588437
LOC112436629	112436629	uncharacterized LOC112436629(LOC112436629)	20	1736118	1736755
LOC112436630	112436630	uncharacterized LOC112436630(LOC112436630)	20	3941005	3947439
LOC112436633	112436633	TELO2-interacting protein 1 homolog(LOC112436633)	20	11096924	11119874
LOC112436636	112436636	tonsoku-like protein(LOC112436636)	20	11120890	11125303
LOC112436638	112436638	deoxynucleoside triphosphate triphosphohydrolase SAMHD1-like(LOC112436638)	20	24558158	24571926
LOC112436639	112436639	uncharacterized LOC112436639(LOC112436639)	20	2729384	2731611
LOC112436640	112436640	uncharacterized LOC112436640(LOC112436640)	20	2731613	2731987
LOC112436642	112436642	monoglyceride lipase-like(LOC112436642)	20	7805289	7827555
LOC112436646	112436646	uncharacterized LOC112436646(LOC112436646)	20	20509265	20511808
LOC112436648	112436648	uncharacterized LOC112436648(LOC112436648)	20	2684465	2685657
LOC112436649	112436649	uncharacterized LOC112436649(LOC112436649)	20	11849283	11853467
LOC112436650	112436650	uncharacterized LOC112436650(LOC112436650)	20	13721212	13734095
LOC112436651	112436651	uncharacterized LOC112436651(LOC112436651)	20	4713352	4713551
LOC112436652	112436652	uncharacterized LOC112436652(LOC112436652)	20	4713672	4714001
LOC112436653	112436653	uncharacterized LOC112436653(LOC112436653)	20	21880968	21883929
LOC112436654	112436654	rho-related GTP-binding protein RhoA-D(LOC112436654)	20	1548070	1571022
LOC112436655	112436655	uncharacterized LOC112436655(LOC112436655)	20	11801267	11803625
LOC112436656	112436656	uncharacterized LOC112436656(LOC112436656)	20	7600541	7602612
LOC112436657	112436657	uncharacterized LOC112436657(LOC112436657)	20	7589583	7591017
LOC112436659	112436659	histone H1-like(LOC112436659)	20	11827692	11828133
LOC112436660	112436660	polyamine-modulated factor 1-binding protein 1-like(LOC112436660)	20	7604946	7606670
LOC112436661	112436661	serine-rich 25 kDa antigen protein-like(LOC112436661)	20	7791571	7798831
LOC112436663	112436663	transmembrane protein 26-like(LOC112436663)	20	9512227	9514707
LOC112436664	112436664	tonsoku-like protein(LOC112436664)	20	10090126	10094097
LOC112436665	112436665	tonsoku-like protein(LOC112436665)	20	10097567	10103302
LOC112436666	112436666	tonsoku-like protein(LOC112436666)	20	10104905	10110741
LOC112436667	112436667	tonsoku-like protein(LOC112436667)	20	10112230	10118058
LOC112436668	112436668	G2/M phase-specific E3 ubiquitin-protein ligase-like(LOC112436668)	20	11864328	11867335
LOC112436669	112436669	G2/M phase-specific E3 ubiquitin-protein ligase-like(LOC112436669)	20	11867977	11876355
LOC112436670	112436670	cytosolic sulfotransferase 3-like(LOC112436670)	20	17411104	17412206
LOC112436671	112436671	uncharacterized LOC112436671(LOC112436671)	20	22340431	22371583
LOC112436672	112436672	zinc finger protein 3 pseudogene(LOC112436672)	20	22389674	22396631
LOC112436673	112436673	uncharacterized LOC112436673(LOC112436673)	20	24454352	24479523
LOC112436674	112436674	probable Bax inhibitor 1(LOC112436674)	20	15900183	15912236
LOC112436677	112436677	uncharacterized LOC112436677(LOC112436677)	20	21276514	21278816
LOC112436678	112436678	uncharacterized LOC112436678(LOC112436678)	20	21284285	21285469
LOC112436682	112436682	uncharacterized LOC112436682(LOC112436682)	20	23411865	23413545
LOC112436683	112436683	uncharacterized LOC112436683(LOC112436683)	20	24620690	24622422
LOC112436684	112436684	low-density lipoprotein receptor-related protein 1-like(LOC112436684)	20	2334317	2342720
LOC112436685	112436685	uncharacterized LOC112436685(LOC112436685)	20	8068828	8074525
LOC112436686	112436686	uncharacterized LOC112436686(LOC112436686)	20	10089171	10090053
LOC112436687	112436687	uncharacterized LOC112436687(LOC112436687)	20	10088137	10089167

## Sheet: Dorsal-pelvic LG7 NC_036786.1
NC_036786.1:9498816-20398117
NCBI Gene symbol	NCBI Gene ID	DAVID Gene Name	Chromosome #	START	STOP
LOC101463643	101463643	adrenomedullin 2b(adm2b)	7	10513174	10520420
parvg	101463676	parvin, gamma(parvg)	7	18062669	18074433
LOC101463735	101463735	uncharacterized LOC101463735(si:dkey-24l11.2)	7	12257216	12262302
LOC101463790	101463790	pleckstrin homology domain-containing family A member 5(LOC101463790)	7	15613833	15709860
sigirr	101463927	single immunoglobulin and toll-interleukin 1 receptor (TIR) domain(sigirr)	7	14578965	14589805
lctl	101463933	lactase-like b(lctlb)	7	13551485	13556233
miox	101463934	myo-inositol oxygenase(miox)	7	10521743	10527034
LOC101464039	101464039	cholesterol 25-hydroxylase like 1, tandem duplicate 2(ch25hl1.2)	7	12262731	12264643
lmf2	101464226	lipase maturation factor 2a(lmf2a)	7	10527094	10532717
LOC101464281	101464281	zinc finger protein aebp2(LOC101464281)	7	15711068	15736194
LOC101464293	101464293	sorting nexin 22(snx22)	7	20368324	20377545
LOC101464326	101464326	cholesterol 25-hydroxylase like 1, tandem duplicate 1(ch25hl1.1)	7	12253664	12254759
LOC101464409	101464409	anoctamin-9(LOC101464409)	7	14592111	14613018
LOC101464506	101464506	MOB kinase activator 2(LOC101464506)	7	10496479	10500557
LOC101464543	101464543	endonuclease domain-containing 1 protein(LOC101464543)	7	18109054	18111289
LOC101464576	101464576	leucine rich repeat containing 18b(lrrc18b)	7	20356305	20357934
kti12	101464609	KTI12 chromatin associated homolog(kti12)	7	12243029	12249397
LOC101464760	101464760	cGMP-inhibited 3',5'-cyclic phosphodiesterase A(LOC101464760)	7	15807491	15917956
ppp6r2	101464791	protein phosphatase 6, regulatory subunit 2b(ppp6r2b)	7	10478384	10495789
pus7	101464826	pseudouridine synthase 7(pus7)	7	18141357	18148227
ano5	101464886	anoctamin 5a(ano5a)	7	14623101	14643390
rpl4	101464891	ribosomal protein L4(rpl4)	7	13540674	13544117
ap3b2	101465060	adaptor related protein complex 3 subunit beta 2(ap3b2)	7	20276515	20335607
LOC101465087	101465087	solute carrier family 28 member 1(slc28a1)	7	12222795	12231277
map2k1	101465184	mitogen-activated protein kinase kinase 1(map2k1)	7	13530246	13540662
LOC101465237	101465237	solute carrier organic anion transporter family member 1C1(LOC101465237)	7	15920245	15938491
LOC101465273	101465273	intestinal mucin-like protein(LOC101465273)	7	14378391	14386205
znf592	101465372	zinc finger protein 592(znf592)	7	12233520	12241901
LOC101465466	101465466	DnaJ heat shock protein family (Hsp40) member A2b(dnaja2b)	7	10469956	10476995
gtf2h1	101465554	general transcription factor IIH, polypeptide 1(gtf2h1)	7	14363147	14375967
LOC101465660	101465660	alpha-kinase 3a(alpk3a)	7	12208323	12221994
slc17a6	101465751	solute carrier family 17 member 6(slc17a6)	7	14645492	14655666
kcp	101465756	kielin cysteine rich BMP regulator(kcp)	7	10432400	10462949
megf11	101465859	multiple EGF-like-domains 11(megf11)	7	13436299	13517412
LOC101465891	101465891	WD repeat-containing protein 78(LOC101465891)	7	18149476	18158771
LOC101465915	101465915	B-cell receptor-associated protein 29(LOC101465915)	7	15938767	15942073
fancf	101466042	FA complementation group F(fancf)	7	14660662	14662704
hps5	101466045	HPS5 biogenesis of lysosomal organelles complex 2 subunit 2(hps5)	7	14347375	14362917
LOC101466152	101466152	MALT paracaspase 3(malt3)	7	12199530	12207179
LOC101466255	101466255	uncharacterized LOC101466255(LOC101466255)	7	10414534	10414921
gas2	101466334	growth arrest specific 2(gas2)	7	14663159	14682368
slc35b4	101466342	solute carrier family 35 member B4(slc35b4)	7	16594501	16609705
adck2	101466381	aarF domain containing kinase 2(adck2)	7	18235914	18241961
LOC101466401	101466401	probable G-protein coupled receptor 22(LOC101466401)	7	15951728	15961545
LOC101466451	101466451	cadherin-related family member 5(LOC101466451)	7	10382032	10390498
LOC101466512	101466512	sorting nexin 1a(snx1a)	7	20250443	20263601
rab3il1	101466541	RAB3A interacting protein (rabin3)-like 1(rab3il1)	7	14323957	14336057
LOC101466627	101466627	FERM domain-containing protein 5(LOC101466627)	7	12128361	12197112
LOC101466629	101466629	vegetative cell wall protein gp1(LOC101466629)	7	16582638	16594413
hbp1	101466684	HMG-box transcription factor 1(hbp1)	7	16029701	16037670
slc24a1	101466727	solute carrier family 24 member 1(slc24a1)	7	13395160	13405166
LOC101466729	101466729	calumenin b(calub)	7	10375835	10380041
dennd2a	101466843	DENN domain containing 2A(si:dkey-82f1.1)	7	18264195	18298250
prkar2b	101466942	protein kinase cAMP-dependent type II regulatory subunit beta(prkar2b)	7	16038042	16044916
LOC101466955	101466955	synaptic vesicle glycoprotein 2(sv2)	7	20263604	20275018
gtf3c6	101466992	general transcription factor IIIC, polypeptide 6, alpha(gtf3c6)	7	10372809	10374682
LOC101467136	101467136	potassium voltage-gated channel, KQT-like subfamily, member 1.2(kcnq1.2)	7	18364182	18554246
hsp90b1	101467243	heat shock protein 90, beta (grp94), member 1(hsp90b1)	7	16049892	16055481
ireb2	101467258	iron-responsive element binding protein 2(ireb2)	7	20231861	20250088
LOC101467291	101467291	zinc finger homeobox protein 3(LOC101467291)	7	10350351	10367528
svip	101467377	small VCP interacting protein(svip)	7	14684875	14689919
mrps35	101467420	mitochondrial ribosomal protein S35(mrps35)	7	18349253	18364146
blm	101467484	BLM RecQ like helicase(blm)	7	12116746	12125653
nt5dc3	101467541	5'-nucleotidase domain containing 3(nt5dc3)	7	16059175	16069644
wdr61	101467555	WD repeat domain 61(wdr61)	7	20212896	20220580
LOC101467590	101467590	bestrophin 1(best1)	7	14318646	14323436
dennd4a	101467591	DENN/MADD domain containing 4A(dennd4a)	7	13405171	13428122
LOC101467593	101467593	deoxyribodipyrimidine photo-lyase(si:ch1073-390k14.1)	7	10335189	10341580
LOC101467632	101467632	golgi transport 1Bb(golt1bb)	7	16602703	16609469
ano3	101467696	anoctamin 3(ano3)	7	14701291	14745524
mansc4	101467733	MANSC domain containing 4(mansc4)	7	18343610	18347476
LOC101467844	101467844	potassium voltage-gated channel subfamily D member 2(LOC101467844)	7	16078183	16109918
LOC101467895	101467895	ferritin, heavy polypeptide 1b(fth1b)	7	14314943	14318649
LOC101467897	101467897	glycine cleavage system H protein, mitochondrial(LOC101467897)	7	10331531	10335059
cdkn1b	101468035	cyclin-dependent kinase inhibitor 1Bb(cdkn1bb)	7	18562942	18566837
LOC101468062	101468062	cellular retinoic acid binding protein 1a(crabp1a)	7	20187776	20208564
LOC101468089	101468089	3-hydroxyacyl-CoA dehydratase 3(hacd3)	7	13378008	13381804
ctsh	101468200	cathepsin H(ctsh)	7	12111250	12114386
fam107b	101468202	family with sequence similarity 107 member B(fam107b)	7	10314527	10330302
yars2	101468331	tyrosyl-tRNA synthetase 2, mitochondrial(yars2)	7	18568215	18572349
LOC101468348	101468348	filamin-C(LOC101468348)	7	16140174	16164184
sin3a	101468364	SIN3 transcription regulator family member Aa(sin3aa)	7	20156710	20173421
LOC101468391	101468391	fin bud initiation factor a(fibina)	7	14760131	14761370
incenp	101468396	inner centromere protein(incenp)	7	14301591	14313805
ints14	101468397	integrator complex subunit 14(ints14)	7	13381534	13388326
LOC101468493	101468493	Ras protein specific guanine nucleotide releasing factor 1(rasgrf1)	7	12085142	12109061
LOC101468613	101468613	uncharacterized LOC101468613(LOC101468613)	7	18642180	18647277
LOC101468684	101468684	transmembrane protein 276a(tmem276a)	7	14765812	14768384
ppcdc	101468691	phosphopantothenoylcysteine decarboxylase(ppcdc)	7	13366264	13377940
LOC101468693	101468693	endosome-lysosome associated apoptosis and autophagy regulator family member 2a(elapor2a)	7	10283640	10302089
ankrd34c	101468801	ankyrin repeat domain 34C(ankrd34c)	7	12027497	12030888
LOC101468847	101468847	coiled-coil domain-containing protein 136(LOC101468847)	7	16166518	16187567
pgghg	101468880	protein-glucosylgalactosylhydroxylysine glucosidase(pgghg)	7	14293166	14299694
LOC101468973	101468973	ubiquitin-associated protein 1-like(LOC101468973)	7	14780209	14783954
lg7h15orf39	101468978	linkage group 7 C15orf39 homolog(lg7h15orf39)	7	13350598	13361773
LOC101468980	101468980	glutamate receptor, metabotropic 3(grm3)	7	10236069	10280294
ptpn9	101469055	protein tyrosine phosphatase non-receptor type 9a(ptpn9a)	7	20127216	20154881
LOC101469091	101469091	isocitrate dehydrogenase (NADP(+)) 2(idh2)	7	11996375	12017583
LOC101469131	101469131	peroxisome proliferator-activated receptor alpha b(pparab)	7	18575133	18662928
LOC101469187	101469187	protein phosphatase 1 regulatory subunit 12A(zmp:0000001167)	7	14268682	14290014
LOC101469282	101469282	protein regulator of cytokinesis 1(LOC101469282)	7	14772831	14780102
snupn	101469350	snurportin 1(snupn)	7	20109712	20120270
LOC101469393	101469393	retinol dehydrogenase 13(LOC101469393)	7	12020483	12027402
LOC101469419	101469419	wingless-type MMTV integration site family, member 7Bb(wnt7bb)	7	18687353	18719120
arih1	101469476	ariadne ubiquitin-conjugating enzyme E2 binding protein homolog 1 (Drosophila)(arih1)	7	13336339	13348612
snx33	101469622	sorting nexin 33(snx33)	7	20081040	20108944
LOC101469658	101469658	zinc finger protein 710a(znf710a)	7	11989309	11996334
sema3d	101469659	sema domain, immunoglobulin domain (Ig), short basic domain, secreted, (semaphorin) 3D(sema3d)	7	10152377	10182456
fbln1	101469880	fibulin 1(fbln1)	7	18805253	18839789
LOC101469934	101469934	Spi-1 proto-oncogene a(spi1a)	7	14769467	14772264
LOC101469940	101469940	hexosaminidase A (alpha polypeptide)(hexa)	7	13326878	13335402
sema3a	101469941	sema domain, immunoglobulin domain (Ig), short basic domain, secreted, (semaphorin) 3Ab(sema3ab)	7	10087946	10111265
LOC101469968	101469968	lamina-associated polypeptide 2(LOC101469968)	7	16622812	16634053
LOC101470022	101470022	patatin-like phospholipase domain containing 2(pnpla2)	7	14259704	14266794
LOC101470126	101470126	sema domain, immunoglobulin domain (Ig), transmembrane domain (TM) and short cytoplasmic domain, (semaphorin) 4Ba(sema4ba)	7	11879086	11961608
sema3e	101470224	sema domain, immunoglobulin domain (Ig), short basic domain, secreted, (semaphorin) 3E(sema3e)	7	10057571	10077925
LOC101470254	101470254	parathyroid hormone-related protein-like(LOC101470254)	7	16671837	16674167
cspg4	101470287	chondroitin sulfate proteoglycan 4(cspg4)	7	19982208	20057347
LOC101470317	101470317	p53-induced death domain protein 1(pidd1)	7	14242685	14257430
LOC101470353	101470353	3-oxo-5-beta-steroid 4-dehydrogenase(LOC101470353)	7	18856224	18862600
LOC101470418	101470418	nuclear receptor subfamily 2, group E, member 3(nr2e3)	7	13316290	13319411
hgf	101470516	hepatocyte growth factor(hgf)	7	9872061	9891322
LOC101470547	101470547	galanin receptor type 2-like(LOC101470547)	7	16678273	16680398
LOC101470578	101470578	uncharacterized LOC101470578(LOC101470578)	7	19964908	19966490
clpx	101470604	caseinolytic mitochondrial matrix peptidase chaperone subunit Xb(clpxb)	7	14784745	14794842
LOC101470609	101470609	solute carrier family 25 member 22a(slc25a22a)	7	14223979	14242476
LOC101470651	101470651	transcription intermediary factor 1-alpha(LOC101470651)	7	18840682	18856206
stoml1	101470715	stomatin (EPB72)-like 1(stoml1)	7	13312672	13315525
LOC101470771	101470771	transmembrane and coiled-coil domain protein 3(LOC101470771)	7	16194864	16209399
LOC101470786	101470786	leucine rich repeat and Ig domain containing 1a(lingo1a)	7	19555853	19684633
LOC101470820	101470820	leucine rich repeat containing 4.2(lrrc4.2)	7	9826338	9833273
LOC101470850	101470850	shaker-related potassium channel tsha2(LOC101470850)	7	16691924	16695326
LOC101470916	101470916	synaptotagmin VIIa(syt7a)	7	14127113	14220596
LOC101471001	101471001	cholesterol side-chain cleavage enzyme, mitochondrial(LOC101471001)	7	13309554	13312584
LOC101471002	101471002	ras and EF-hand domain-containing protein(zgc:162879)	7	11867309	11877884
ppib	101471034	peptidylprolyl isomerase B (cyclophilin B)(ppib)	7	20389870	20394603
LOC101471046	101471046	uncharacterized LOC101471046(LOC101471046)	7	16209493	16210686
LOC101471083	101471083	mucin-2-like(LOC101471083)	7	14468537	14488350
LOC101471126	101471126	potassium voltage-gated channel, shaker-related subfamily, member 1a(kcna1a)	7	16695598	16704390
nr2c1	101471237	nuclear receptor subfamily 2, group C, member 1(nr2c1)	7	16212963	16221449
LOC101471253	101471253	high mobility group 20A(hmg20a)	7	19141969	19152402
stra6	101471279	signaling receptor and transporter of retinol STRA6(stra6)	7	13241613	13306476
LOC101471380	101471380	P2Y purinoceptor 4-like(LOC101471380)	7	14643818	14645207
cnot4	101471418	CCR4-NOT transcription complex, subunit 4a(cnot4a)	7	16718098	16728510
LOC101471675	101471675	gliomedin(LOC101471675)	7	14797789	14810297
LOC101471709	101471709	uncharacterized LOC101471709(zgc:136858)	7	16729328	16739335
LOC101471711	101471711	solute carrier family 6 member 13(slc6a13)	7	18863044	18888531
peak1	101471742	pseudopodium-enriched atypical kinase 1(peak1)	7	19157930	19260431
islr2	101471771	immunoglobulin superfamily containing leucine-rich repeat 2(islr2)	7	13236613	13240808
LOC101471866	101471866	FKBP prolyl isomerase 16(fkbp16)	7	11836086	11867225
mon2	101471999	MON2 homolog, regulator of endosome-to-Golgi trafficking(mon2)	7	18892110	18925821
ppp1r32	101472051	protein phosphatase 1, regulatory subunit 32(ppp1r32)	7	14111952	14117305
LOC101472138	101472138	RNA polymerase II elongation factor ELL(LOC101472138)	7	11808703	11833820
LOC101472184	101472184	troponin I, slow skeletal muscle(LOC101472184)	7	16746105	16749813
sema7a	101472248	semaphorin 7A(sema7a)	7	13221338	13230835
pex11a	101472443	peroxisomal biogenesis factor 11 alpha(pex11a)	7	11804142	11806905
ppm1h	101472487	protein phosphatase, Mg2+/Mn2+ dependent, 1H(ppm1h)	7	18933552	18981586
LOC101472509	101472509	netrin-4(LOC101472509)	7	16261388	16269839
LOC101472554	101472554	COMM domain containing 4(commd4)	7	13207514	13212441
LOC101472649	101472649	eosinophil peroxidase(epx)	7	14336810	14345212
LOC101472739	101472739	uncharacterized LOC101472739(LOC101472739)	7	11794412	11796760
LOC101472789	101472789	very long-chain acyl-CoA synthetase(LOC101472789)	7	14823358	14846874
metap2	101472790	methionyl aminopeptidase 2a(metap2a)	7	16255178	16261212
LOC101472835	101472835	uncharacterized LOC101472835(LOC101472835)	7	13189869	13192955
lrrc10b	101472933	leucine rich repeat containing 10B(lrrc10b)	7	14103299	14105411
LOC101472934	101472934	gonadotropin releasing hormone receptor 4(gnrhr4)	7	11769185	11781296
frmd4a	101472936	FERM domain containing 4A(frmd4a)	7	9431184	9527281
tmem80	101472937	transmembrane protein 80(tmem80)	7	14031048	14035025
LOC101472972	101472972	arginine vasopressin receptor 1Aa(avpr1aa)	7	19000547	19005589
man2c1	101473033	mannosidase, alpha, class 2C, member 1(man2c1)	7	13193109	13202353
lg7h3orf20	101473084	linkage group 7 C3orf20 homolog(lg7h3orf20)	7	16247288	16255062
LOC101473241	101473241	fatty acid desaturase 2(LOC101473241)	7	14092209	14097863
LOC101473242	101473242	si:dkeyp-59c12.1(si:dkeyp-59c12.1)	7	11731802	11733695
LOC101473244	101473244	uncharacterized LOC101473244(si:dkey-30c15.13)	7	9528360	9530526
cracr2b	101473245	calcium release activated channel regulator 2B(cracr2b)	7	13991452	14001824
ca12	101473332	carbonic anhydrase XII(ca12)	7	13179483	13188492
LOC101473532	101473532	solute carrier organic anion transporter family member 3A1a(slco3a1a)	7	11675225	11711009
LOC101473534	101473534	putative pyruvate dehydrogenase phosphatase isoenzyme 2(pdp2)	7	9537544	9543613
LOC101473535	101473535	E3 ubiquitin-protein ligase TRIM39(LOC101473535)	7	13968435	13971294
LOC101473571	101473571	troponin I, fast skeletal muscle(LOC101473571)	7	16750839	16765445
LOC101473619	101473619	kunitz-type serine protease inhibitor bitisilin-3-like(si:dkeyp-73b11.8)	7	13142366	13145713
st8sia2	101473824	ST8 alpha-N-acetyl-neuraminide alpha-2,8-sialyltransferase 2(st8sia2)	7	11650017	11665815
ccdc33	101473827	coiled-coil domain containing 33(ccdc33)	7	13302646	13309506
bpgm	101473870	2,3-bisphosphoglycerate mutase(bpgm)	7	16769462	16773620
LOC101473919	101473919	fatty acid desaturase 2(LOC101473919)	7	14066636	14073595
usp3	101473920	ubiquitin specific peptidase 3(usp3)	7	13124286	13139296
LOC101473966	101473966	FYVE, RhoGEF and PH domain-containing protein 6-like(LOC101473966)	7	16230810	16246608
terb1	101474015	telomere repeat binding bouquet formation protein 1(terb1)	7	9548322	9561862
fam174b	101474125	family with sequence similarity 174 member B(fam174b)	7	11645689	11649788
neil1	101474128	nei-like DNA glycosylase 1(neil1)	7	13202355	13207235
cald1	101474163	caldesmon 1b(cald1b)	7	16784994	16804978
LOC101474188	101474188	ADP-dependent glucokinase(adpgk)	7	20379806	20386470
LOC101474216	101474216	fatty acid desaturase 2(LOC101474216)	7	14078260	14086271
fbxl22	101474217	F-box and leucine-rich repeat protein 22(fbxl22)	7	13118075	13122849
hal	101474270	histidine ammonia-lyase(hal)	7	16281516	16288331
LOC101474343	101474343	troponin T2d, cardiac(tnnt2d)	7	16806240	16809948
galk2	101474367	galactokinase 2(galk2)	7	14861524	14865840
LOC101474413	101474413	beta-1,3-galactosyl-O-glycosyl-glycoprotein beta-1,6-N-acetylglucosaminyltransferase 3(LOC101474413)	7	12865688	12867281
LOC101474466	101474466	solute carrier family 25 member 44a(slc25a44a)	7	20221660	20229201
eps8l2	101474491	EPS8 like 2(eps8l2)	7	14036169	14066575
LOC101474493	101474493	circadian-associated transcriptional repressor(LOC101474493)	7	13075992	13084562
chd2	101474586	chromodomain helicase DNA binding protein 2(chd2)	7	11613511	11641438
LOC101474618	101474618	dynamin 1-like(dnm1l)	7	16810111	16820250
nrg4	101474689	neuregulin 4(nrg4)	7	12390528	12392560
dapk2	101474766	death-associated protein kinase 2b(dapk2b)	7	13053672	13068918
cep152	101474819	centrosomal protein 152(cep152)	7	14848904	14861210
cdk17	101475021	cyclin dependent kinase 17(LOC101475021)	7	16302715	16338530
synm	101475263	synemin, intermediate filament protein(synm)	7	10932203	10940608
atp8b4	101475308	ATPase phospholipid transporting 8B4(atp8b4)	7	14868099	14887712
rgma	101475448	repulsive guidance molecule BMP co-receptor a(rgma)	7	11597068	11609417
LOC101475485	101475485	DnaJ heat shock protein family (Hsp40) member B9a(dnajb9a)	7	16820712	16823372
elk3	101475505	ETS transcription factor ELK3(elk3)	7	16294916	16302667
myrf	101475559	myelin regulatory factor(myrf)	7	14007787	14028748
LOC101475563	101475563	synaptotagmin Ib(syt1b)	7	10753737	10758051
tbc1d2b	101475660	TBC1 domain family, member 2B(tbc1d2b)	7	13039217	13053522
LOC101475661	101475661	proteoglycan 4(LOC101475661)	7	9563667	9565834
sqor	101475715	sulfide quinone oxidoreductase(sqor)	7	14898475	14906200
LOC101475751	101475751	LysM, putative peptidoglycan-binding, domain containing 4(lysmd4)	7	11484311	11488287
LOC101475781	101475781	calcium-independent phospholipase A2-gamma(LOC101475781)	7	16823843	16848350
LOC101475800	101475800	upper zone of growth plate and cartilage matrix associated b(ucmab)	7	16343536	16352898
otogl	101475853	otogelin-like(otogl)	7	10721987	10750517
LOC101475948	101475948	SH2 domain-containing protein 7(LOC101475948)	7	13033053	13036570
LOC101476093	101476093	calcium/calmodulin-dependent protein kinase 1Db(camk1db)	7	16353069	16379867
LOC101476145	101476145	troponin I, skeletal, slow c(tnni1c)	7	10559890	10564454
LOC101476243	101476243	calcium and integrin binding family member 2(cib2)	7	13021240	13029323
nr2f2	101476329	nuclear receptor subfamily 2, group F, member 2(nr2f2)	7	11277777	11288375
LOC101476385	101476385	secretory carrier membrane protein 5a(scamp5a)	7	14934076	14946471
LOC101476386	101476386	CUGBP Elav-like family member 2(LOC101476386)	7	16417509	16448834
LOC101476437	101476437	uncharacterized LOC101476437(si:dkey-30c15.2)	7	9587873	9592739
LOC101476438	101476438	piccolo presynaptic cytomatrix protein b(pclob)	7	9983907	10045471
LOC101476481	101476481	neuronal cell adhesion molecule(LOC101476481)	7	16855255	16933187
LOC101476539	101476539	isocitrate dehydrogenase (NAD(+)) 3 catalytic subunit alpha(idh3a)	7	13009676	13015783
LOC101476727	101476727	neuropilin (NRP) and tolloid (TLL)-like 2b(neto2b)	7	9577929	9585456
cacna2d1	101476728	calcium voltage-gated channel auxiliary subunit alpha2delta 1(cacna2d1)	7	9900400	9978890
LOC101476817	101476817	multiple C2 domains, transmembrane 2a(mctp2a)	7	11059876	11093372
parp16	101476862	poly (ADP-ribose) polymerase family, member 16(parp16)	7	14928850	14934899
taf3	101476864	TAF3 RNA polymerase II, TATA box binding protein (TBP)-associated facto(taf3)	7	16453017	16462085
lrrc61	101477001	leucine rich repeat containing 61(lrrc61)	7	13016879	13020279
mef2a	101477103	myocyte enhancer factor 2aa(mef2aa)	7	10985358	11051952
acsbg1	101477283	acyl-CoA synthetase bubblegum family member 1(acsbg1)	7	13004205	13009393
LOC101477331	101477331	ubiquitin-conjugating enzyme E2 Q2(LOC101477331)	7	14949824	14960756
LOC101477374	101477374	transmembrane protein 138(tmem138)	7	14001842	14004945
LOC101477376	101477376	ADP-ribosylation factor 5(LOC101477376)	7	9595232	9600395
dbx2	101477507	developing brain homeobox 2(dbx2)	7	17622770	17626484
LOC101477616	101477616	ankyrin repeat and SOCS box containing 13b(asb13b)	7	16524580	16531563
LOC101477653	101477653	uncharacterized LOC101477653(zgc:77752)	7	9602085	9606591
LOC101477750	101477750	ribosomal protein S27 like(rps27l)	7	12998336	13000640
mov10l1	101477787	Mov10 like RISC complex RNA helicase 1(mov10l1)	7	17634987	17645216
tmem258	101477853	transmembrane protein 258(tmem258)	7	14005266	14007312
LOC101477904	101477904	neuroplastin a(nptna)	7	14977371	14994458
LOC101477906	101477906	neuroepithelial cell-transforming gene 1 protein(LOC101477906)	7	16539374	16547757
LOC101477948	101477948	outer dense fiber of sperm tails 3B(odf3b)	7	9606820	9610743
hdac10	101478067	histone deacetylase 10(hdac10)	7	18095835	18103036
gatd1	101478127	glutamine amidotransferase class 1 domain containing 1(gatd1)	7	13984172	13986516
LOC101478215	101478215	DnaJ heat shock protein family (Hsp40) member A(dnaja)	7	13000642	13003589
LOC101478342	101478342	apelin receptor 2(aplnr2)	7	18104458	18106523
LOC101478365	101478365	hyperpolarization activated cyclic nucleotide-gated potassium channel 4l(hcn4l)	7	14999373	15016620
LOC101478403	101478403	CD151 molecule(cd151)	7	13986577	13991176
LOC101478404	101478404	RAB, member of RAS oncogene family-like 2(rabl2)	7	9616764	9621847
LOC101478621	101478621	plexin-B2(LOC101478621)	7	18131570	18140334
LOC101478637	101478637	pyruvate kinase M1/2b(pkmb)	7	15017924	15025534
LOC101478685	101478685	ras-related protein Rab-8B(LOC101478685)	7	12994343	12997305
LOC101478686	101478686	SH3 and multiple ankyrin repeat domains protein 3(LOC101478686)	7	9623493	9755964
LOC101478741	101478741	CTD (carboxy-terminal domain, RNA polymerase II, polypeptide A) small phosphatase like 2a(ctdspl2a)	7	14906473	14919371
LOC101478806	101478806	contactin 1a(cntn1a)	7	16968764	17006504
chid1	101478867	chitinase domain containing 1(chid1)	7	13980030	13984159
LOC101478901	101478901	SRSF protein kinase 2(srpk2)	7	18163005	18235793
LOC101478919	101478919	poly (ADP-ribose) polymerase family, member 6b(parp6b)	7	15031305	15039292
LOC101478969	101478969	transient receptor potential cation channel subfamily M member 1(LOC101478969)	7	12974825	12994793
LOC101479022	101479022	serine protease HTRA1-like(si:ch73-330k17.3)	7	14923542	14925164
ighmbp2	101479151	immunoglobulin mu DNA binding protein 2(ighmbp2)	7	13971358	13979966
LOC101479183	101479183	transcriptional enhancer factor TEF-3(LOC101479183)	7	18308822	18338398
LOC101479247	101479247	uncharacterized LOC101479247(LOC101479247)	7	12954121	12954954
nat10	101479295	N-acetyltransferase 10(nat10)	7	15095383	15107441
LOC101479345	101479345	mucin-2(LOC101479345)	7	14387902	14409431
LOC101479446	101479446	E3 ubiquitin-protein ligase TRIM39-like(LOC101479446)	7	13959413	13963011
LOC101479448	101479448	Kruppel-like factor 13(klf13)	7	12935413	12954083
LOC101479478	101479478	PDZ domain-containing RING finger protein 4(LOC101479478)	7	17040492	17159929
igf1r	101479543	insulin-like growth factor 1a receptor(igf1ra)	7	10854091	10930059
caprin1	101479582	cell cycle associated protein 1b(caprin1b)	7	15109508	15123283
rapsn	101479725	receptor-associated protein of the synapse, 43kD(rapsn)	7	13952149	13957559
LOC101479726	101479726	OTU deubiquitinase 7A(otud7a)	7	12882582	12925928
LOC101479819	101479819	pyroglutamyl-peptidase 1(LOC101479819)	7	10914183	10931271
LOC101479864	101479864	parietopsin(parietopsin)	7	16069719	16072999
LOC101479938	101479938	glucoside xylosyltransferase 1(LOC101479938)	7	17203816	17212617
ddb2	101480006	damage-specific DNA binding protein 2(ddb2)	7	13940402	13944545
LOC101480007	101480007	proprotein convertase subtilisin/kexin type 5(LOC101480007)	7	12867386	12882182
dhtkd1	101480158	dehydrogenase E1 and transketolase domain containing 1(dhtkd1)	7	16386873	16411041
LOC101480430	101480430	YY1-associated factor 2(LOC101480430)	7	17213061	17217019
LOC101480453	101480453	cingulin(LOC101480453)	7	15057248	15065963
LOC101480454	101480454	transcription activation suppressor family member 2(tasor2)	7	16467921	16499634
bnip2	101480492	BCL2 interacting protein 2(bnip2)	7	12843335	12855732
cfap161	101480493	cilia and flagella associated protein 161(cfap161)	7	10839392	10843424
LOC101480726	101480726	periphilin-1(LOC101480726)	7	17218571	17236751
foxb1	101480780	forkhead box B1a(foxb1a)	7	12813488	12815615
LOC101480781	101480781	ceramide synthase 3b(cers3b)	7	10830761	10838686
LOC101480882	101480882	protein FAM180A(LOC101480882)	7	13944614	13946819
LOC101481057	101481057	annexin A2-A(LOC101481057)	7	12779632	12783768
kbtbd4	101481164	kelch repeat and BTB (POZ) domain containing 4(kbtbd4)	7	13946595	13951755
LOC101481198	101481198	prickle homolog 1a(prickle1a)	7	17237226	17260647
LOC101481273	101481273	anoctamin-1(LOC101481273)	7	10808764	10829616
LOC101481416	101481416	synaptotagmin XVIIIb(syt18b)	7	15053679	15058012
vwf	101481554	von Willebrand factor(vwf)	7	10786219	10807993
ice2	101481751	interactor of little elongator complex ELL subunit 2(ice2)	7	12770013	12779440
LOC101481833	101481833	kinesin-like protein KIF23(LOC101481833)	7	13927752	13940039
LOC101481835	101481835	CD9 molecule a(cd9a)	7	10777687	10784176
LOC101481879	101481879	uncharacterized LOC101481879(LOC101481879)	7	17310368	17312210
LOC101482086	101482086	enhancer of mRNA decapping 3 homolog (S. cerevisiae)(edc3)	7	15067306	15072688
rora	101482237	RAR-related orphan receptor A, paralog a(roraa)	7	12579858	12767991
bbs10	101482324	Bardet-Biedl syndrome 10(bbs10)	7	10767986	10776228
LOC101482360	101482360	A disintegrin and metalloproteinase with thrombospondin motifs 20(LOC101482360)	7	17328941	17407223
LOC101482381	101482381	tyrosine-protein kinase CSK(LOC101482381)	7	15073143	15087328
LOC101482530	101482530	kinesin-like protein KIF23(LOC101482530)	7	13916055	13924061
twf1	101482645	twinfilin actin binding protein 1(twf1)	7	17455628	17465792
adal	101482662	adenosine deaminase-like(adal)	7	15087946	15095404
LOC101482720	101482720	C2 calcium dependent domain containing 4A(c2cd4a)	7	12522755	12524371
irak4	101482950	interleukin-1 receptor-associated kinase 4(irak4)	7	17449588	17455630
tln2	101483014	talin 2b(tln2b)	7	12426282	12520257
ptprq	101483016	protein tyrosine phosphatase receptor type Q(ptprq)	7	10674607	10721245
LOC101483199	101483199	TLE family member 3, transcriptional corepressor a(tle3a)	7	13826037	13845090
LOC101483233	101483233	P2Y purinoceptor 1-like(LOC101483233)	7	17486283	17490445
lmo2	101483259	LIM domain only 2 (rhombotin-like 1)(lmo2)	7	15130247	15134337
LOC101483484	101483484	mortality factor 4 like 1(morf4l1)	7	13776322	13784303
tmem117	101483516	transmembrane protein 117(tmem117)	7	17469995	17520536
alx4	101483540	ALX homeobox 4b(alx4b)	7	15158957	15182933
tspan18	101483842	tetraspanin 18b(tspan18b)	7	15196544	15231475
pias1	101483967	protein inhibitor of activated STAT, 1b(pias1b)	7	13761576	13774032
tpm1	101484055	tropomyosin 1 (alpha)(tpm1)	7	12402419	12413528
LOC101484056	101484056	IQ motif and Sec7 domain ArfGEF 3b(iqsec3b)	7	10635359	10668843
cd82	101484104	CD82 molecule b(cd82b)	7	15283120	15306857
LOC101484245	101484245	SKI family transcriptional corepressor 1b(skor1b)	7	13753661	13760673
nell2	101484358	neural EGFL like 2a(nell2a)	7	17528001	17615563
ddx11	101484513	DEAD/H (Asp-Glu-Ala-Asp/His) box helicase 11(ddx11)	7	10610245	10623620
tp53i11	101484563	tumor protein p53 inducible protein 11b(tp53i11b)	7	15308244	15356017
LOC101484628	101484628	sizzled(szl)	7	17629050	17630670
lg7h15orf61	101484694	linkage group 7 C15orf61 homolog(lg7h15orf61)	7	13716149	13718320
lactb	101484695	lactamase, beta(lactb)	7	12392706	12396772
nuak1	101484918	NUAK family, SNF1-like kinase, 1b(nuak1b)	7	17657609	17675731
LOC101485035	101485035	E3 ubiquitin/ISG15 ligase TRIM25(si:dkey-29p10.4)	7	15373536	15380709
iqch	101485179	IQ motif containing H(iqch)	7	13692414	13714372
washc1	101485180	WAS protein family homolog 1(wash1)	7	10624046	10630995
lg7h12orf75	101485214	linkage group 7 C12orf75 homolog(lg7h12orf75)	7	17734511	17745595
LOC101485328	101485328	LHFPL tetraspan subfamily member 3 protein(LOC101485328)	7	15386655	15411644
etfa	101485364	electron transfer flavoprotein subunit alpha(etfa)	7	12352426	12360364
fkbp4	101485455	FKBP prolyl isomerase 4(fkbp4)	7	10602622	10609949
appl2	101485485	adaptor protein, phosphotyrosine interaction, PH domain and leucine zipper containing 2(appl2)	7	17747373	17768762
reln	101485598	reelin(reln)	7	15454250	15553795
saal1	101485629	serum amyloid A-like 1(saal1)	7	14496807	14507491
LOC101485737	101485737	beta-1,4-N-acetyl-galactosaminyl transferase 3b(b4galnt3b)	7	10565365	10578872
tmem266	101485824	transmembrane protein 266(tmem266)	7	12360468	12387991
sergef	101485902	secretion regulating guanine nucleotide exchange factor(sergef)	7	14520874	14531495
tubgcp6	101485942	tubulin, gamma complex associated protein 6(tubgcp6)	7	17768823	17792582
c2cd5	101486023	C2 calcium dependent domain containing 5(c2cd5)	7	10533160	10559545
LOC101486127	101486127	ISL LIM homeobox 2a(isl2a)	7	12345767	12349986
LOC101486253	101486253	plexin b2b(plxnb2b)	7	17797885	17936327
tph1	101486409	tryptophan hydroxylase 1 (tryptophan 5-monooxygenase) a(tph1a)	7	14513144	14518462
aagab	101486415	alpha and gamma adaptin binding protein(aagab)	7	13688228	13692149
scaper	101486416	S-phase cyclin A-associated protein in the ER(scaper)	7	12284904	12344448
kcnc1	101486700	potassium voltage-gated channel, Shaw-related subfamily, member 1b(kcnc1b)	7	14531510	14543806
smad3	101486706	SMAD family member 3b(smad3b)	7	13671549	13687707
smad6	101486989	SMAD family member 6b(smad6b)	7	13620588	13643654
tspan3	101487077	tetraspanin 3a(tspan3a)	7	12266721	12270484
shisal1	101487115	shisa like 1b(shisal1b)	7	18010356	18050596
LOC101487370	101487370	proline-serine-threonine phosphatase interacting protein 1a(pstpip1a)	7	12270779	12280140
LOC101487553	101487553	CD81 antigen(LOC101487553)	7	14544363	14554738
snapc5	101487560	small nuclear RNA activating complex, polypeptide 5(snapc5)	7	13556504	13558504
parvb	101487589	parvin, beta(parvb)	7	18076747	18094447
LOC101487611	101487611	1-phosphatidylinositol 4,5-bisphosphate phosphodiesterase zeta-1(LOC101487611)	7	15575566	15595741
pkp3	101487840	plakophilin 3a(pkp3a)	7	14560803	14578464
rcn2	101487850	reticulocalbin 2(rcn2)	7	12279665	12284087
zwilch	101488027	zwilch kinetochore protein(zwilch)	7	13544549	13551558
pik3c2g	101488075	phosphatidylinositol-4-phosphate 3-kinase catalytic subunit type 2 gamma(pik3c2g)	7	15561120	15575568
LOC105940530	105940530	mucin-2-like(LOC105940530)	7	14435889	14458313
LOC105940637	105940637	intestinal mucin-like protein(LOC105940637)	7	14414495	14426077
LOC105940938	105940938	uncharacterized LOC105940938(LOC105940938)	7	10940392	10958024
LOC105940940	105940940	uncharacterized LOC105940940(LOC105940940)	7	10885663	10891975
LOC105940943	105940943	uncharacterized LOC105940943(LOC105940943)	7	11287041	11292973
LOC105940944	105940944	uncharacterized LOC105940944(LOC105940944)	7	13566486	13602155
LOC105940945	105940945	uncharacterized LOC105940945(LOC105940945)	7	9565888	9567390
LOC105941205	105941205	uncharacterized LOC105941205(LOC105941205)	7	17342161	17347113
LOC105941291	105941291	sperm acrosome membrane-associated protein 4(LOC105941291)	7	15557133	15558063
LOC105941382	105941382	uncharacterized LOC105941382(LOC105941382)	7	19990576	19991987
LOC106674750	106674750	beta-1,3-galactosyl-O-glycosyl-glycoprotein beta-1,6-N-acetylglucosaminyltransferase 3-like(LOC106674750)	7	12855827	12857914
LOC106675440	106675440	plexin-B2-like(LOC106675440)	7	18118376	18129221
LOC106675461	106675461	brain aromatase(LOC106675461)	7	14812280	14816264
LOC106676981	106676981	uncharacterized LOC106676981(LOC106676981)	7	19020873	19021828
LOC111500334	111500334	interleukin-17 receptor A(LOC111500334)	7	16739341	16744396
LOC111500487	111500487	uncharacterized LOC111500487(LOC111500487)	7	12413830	12438988
LOC111500494	111500494	small nucleolar RNA SNORD18(LOC111500494)	7	13541350	13541420
LOC111500495	111500495	small nucleolar RNA SNORD18(LOC111500495)	7	13541080	13541146
LOC111500496	111500496	small nucleolar RNA SNORD16(LOC111500496)	7	13542873	13542971
LOC111500497	111500497	small nucleolar RNA SNORD16(LOC111500497)	7	13542470	13542568
LOC111500498	111500498	Z30 small nucleolar RNA(LOC111500498)	7	13934912	13935009
trnam-cau	111500499	transfer RNA methionine (anticodon CAU)(trnam-cau)	7	9522772	9522844
trnah-gug	111500500	transfer RNA histidin (anticodon GUG)(trnah-gug)	7	12197712	12197783
trnaq-cug	111500501	transfer RNA glutamine (anticodon CUG)(trnaq-cug)	7	13431898	13431969
LOC111500690	111500690	uncharacterized LOC111500690(LOC111500690)	7	19053411	19054742
LOC111500966	111500966	U4 spliceosomal RNA(LOC111500966)	7	17944766	17944906
LOC111500967	111500967	U4 spliceosomal RNA(LOC111500967)	7	17946358	17946498
LOC111500970	111500970	U4 spliceosomal RNA(LOC111500970)	7	17945690	17945830
LOC111500971	111500971	U4 spliceosomal RNA(LOC111500971)	7	17943636	17943776
trnat-agu	111500972	transfer RNA threonine (anticodon AGU)(trnat-agu)	7	18161600	18161673
trnay-gua	111500974	transfer RNA tyrosine (anticodon GUA)(trnay-gua)	7	16279002	16279088
LOC111501128	111501128	catalase(LOC111501128)	7	19332641	19342559
LOC111501516	111501516	uncharacterized LOC111501516(LOC111501516)	7	19711296	19712821
trnay-gua	111501741	transfer RNA tyrosine (anticodon GUA)(trnay-gua)	7	14683135	14683221
LOC112430013	112430013	lactate dehydrogenase Bb(ldhbb)	7	16614671	16620486
LOC112435066	112435066	uncharacterized LOC112435066(LOC112435066)	7	12032669	12034632
LOC112435077	112435077	ribonuclease P protein subunit p25-like protein(LOC112435077)	7	15042036	15042899
LOC112435099	112435099	uncharacterized LOC112435099(LOC112435099)	7	14075983	14077827
LOC112435101	112435101	spexin-like(LOC112435101)	7	16611591	16614260
LOC112435126	112435126	catalase-like(LOC112435126)	7	19299240	19308108
LOC112435129	112435129	UDP-glucuronosyltransferase 2C1 pseudogene(LOC112435129)	7	14965081	14968481
LOC112435143	112435143	uncharacterized LOC112435143(LOC112435143)	7	19083808	19085607
LOC112435147	112435147	AP-4 complex subunit epsilon-1-like(LOC112435147)	7	14816522	14820342
LOC112435152	112435152	cell wall protein DAN4-like(LOC112435152)	7	14426202	14433604
LOC112435155	112435155	AT-rich interactive domain-containing protein 3A-like(LOC112435155)	7	15046658	15049027
LOC112435158	112435158	zinc finger MYM-type protein 1-like(LOC112435158)	7	16513567	16515816
LOC112435159	112435159	uncharacterized LOC112435159(LOC112435159)	7	16954382	16958239
LOC112435165	112435165	synaptotagmin XII(syt12)	7	19264006	19290232
LOC112435166	112435166	uncharacterized LOC112435166(LOC112435166)	7	19365302	19366633
LOC112435202	112435202	uncharacterized LOC112435202(LOC112435202)	7	10591711	10601297
LOC112435208	112435208	uncharacterized LOC112435208(LOC112435208)	7	19330818	19331486
LOC112435209	112435209	interferon induced transmembrane protein 5(ifitm5)	7	19346882	19348621

## Sheet: Dorsal-pelvic LG20 NC_036799.1
NC_036799.1:86290-7628007
NCBI Gene symbol	NCBI Gene ID	DAVID Gene Name	Chromosome #	START	STOP
LOC101463660	101463660	lymphoid-restricted membrane protein(LOC101463660)	20	3596552	3599336
lmbr1l	101463661	limb development membrane protein 1-like(lmbr1l)	20	2465357	2478962
LOC101463839	101463839	pepsin A-like(LOC101463839)	20	3924291	3927015
LOC101464044	101464044	uncharacterized LOC101464044(zgc:154075)	20	7135531	7141422
LOC101464052	101464052	ubiquitin specific peptidase 21(usp21)	20	911766	916407
rpl10a	101464337	ribosomal protein L10a(rpl10a)	20	3593646	3595612
wnt10b	101464338	wingless-type MMTV integration site family, member 10b(wnt10b)	20	2429333	2433257
LOC101464339	101464339	rho-related GTP-binding protein RhoA-C(LOC101464339)	20	906845	910309
arf3	101464624	ADP-ribosylation factor 3a(arf3a)	20	2422994	2427370
taf10	101464709	TAF10 RNA polymerase II, TATA box binding protein (TBP)-associated factor(taf10)	20	7131281	7135080
fance	101464808	FA complementation group E(fance)	20	3587157	3592345
lrrc23	101464809	leucine rich repeat containing 23(lrrc23)	20	890445	895438
gpr160	101464991	G protein-coupled receptor 160(si:dkeyp-100a1.6)	20	7122427	7127816
lg20h1orf127	101464992	linkage group 20 C1orf127 homolog(lg20h1orf127)	20	5111224	5118814
ppard	101465104	peroxisome proliferator-activated receptor delta b(ppardb)	20	3573245	3582141
LOC101465105	101465105	erb-b2 receptor tyrosine kinase 3b(erbb3b)	20	2406380	2419750
ppih	101465278	peptidylprolyl isomerase H (cyclophilin H)(ppih)	20	7112508	7130344
tardbp	101465279	TAR DNA binding protein a(tardbpa)	20	5106017	5111114
LOC101465289	101465289	RNA binding motif protein 10(rbm10)	20	895530	906408
LOC101465390	101465390	proliferation-associated 2G4, b(pa2g4b)	20	2399705	2405068
ybx1	101465558	Y box binding protein 1(ybx1)	20	7103283	7108062
LOC101465572	101465572	makorin, ring finger protein, 4(mkrn4)	20	3582307	3586767
pgd	101465665	phosphogluconate dehydrogenase(pgd)	20	5094508	5099729
LOC101465676	101465676	uncharacterized LOC101465676(LOC101465676)	20	2396678	2397513
LOC101465773	101465773	transketolase b(tktb)	20	881377	889833
LOC101465872	101465872	extended synaptotagmin-like protein 1a(esyt1a)	20	2376671	2393670
ube4b	101465972	ubiquitination factor E4B, UFD2 homolog (S. cerevisiae)(ube4b)	20	5004741	5024231
def6	101466063	DEF6 guanine nucleotide exchange factor(def6)	20	3561166	3570872
LOC101466064	101466064	extracellular matrix protein 2(si:dkey-32e6.6)	20	863082	876415
fmnl3	101466169	formin-like 3(fmnl3)	20	2344620	2376398
LOC101466360	101466360	trophinin associated protein(troap)	20	3549586	3559303
bgn	101466361	biglycan b(bgnb)	20	839510	856315
arhgef16	101466458	Rho guanine nucleotide exchange factor (GEF) 16(arhgef16)	20	7090714	7103058
lzic	101466633	leucine zipper and CTNNBIP1 domain containing(lzic)	20	4992095	4994597
LOC101466647	101466647	UDP-Gal:betaGlcNAc beta 1,4- galactosyltransferase, polypeptide 3(b4galt3)	20	833121	839184
acot7	101466734	acyl-CoA thioesterase 7(acot7)	20	6960389	7020648
LOC101466826	101466826	phosphofructokinase, muscle a(pfkma)	20	3529825	3546903
nmnat1	101466903	nicotinamide nucleotide adenylyltransferase 1(nmnat1)	20	4994634	5000192
LOC101466914	101466914	low density lipoprotein receptor-related protein 1Ab(lrp1ab)	20	2250947	2331857
LOC101466998	101466998	CAP-Gly domain-containing linker protein 1-like(LOC101466998)	20	7597585	7600354
LOC101467210	101467210	RNA binding motif, single stranded interacting protein 2b(rbms2b)	20	2229376	2245754
LOC101467295	101467295	piezo-type mechanosensitive ion channel component 2-like(si:dkey-11f4.7)	20	7440629	7473963
LOC101467308	101467308	ATPase H+ transporting accessory protein 1 like b(atp6ap1lb)	20	813727	827508
LOC101467502	101467502	la-related protein 4(LOC101467502)	20	3514900	3528059
tas1r2	101467598	taste 1 receptor member 2(tas1r2)	20	7249079	7252836
lrtm1	101467612	leucine rich repeats and transmembrane domains 1(lrtm1)	20	680255	686302
LOC101467715	101467715	SUMO specific peptidase 1(senp1)	20	2217669	2226584
gpr153	101467795	G protein-coupled receptor 153(gpr153)	20	6912945	6955100
clstn1	101467902	calsyntenin 1(clstn1)	20	4951852	4990311
espn	101467903	espin(espn)	20	7051652	7088890
cacna2d3	101467919	calcium voltage-gated channel auxiliary subunit alpha2delta 3(LOC101467919)	20	659565	790740
mfsd5	101468017	major facilitator superfamily domain containing 5(mfsd5)	20	2207204	2209913
LOC101468206	101468206	transcription factor HES-2(LOC101468206)	20	7027922	7031224
asb8	101468221	ankyrin repeat and SOCS box containing 8(asb8)	20	3508577	3513581
faim2	101468314	Fas apoptotic inhibitory molecule 2(faim2)	20	2210180	2216032
LOC101468418	101468418	protein Wnt-5a(LOC101468418)	20	613074	624885
LOC101468497	101468497	taste receptor type 1 member 2-like(LOC101468497)	20	6889425	6893145
LOC101468498	101468498	transcription factor HES-2-like(LOC101468498)	20	7021645	7022563
rarg	101468595	retinoic acid receptor gamma a(rarga)	20	2152194	2205096
atf7	101468715	activating transcription factor 7a(atf7a)	20	3485772	3506092
LOC101468804	101468804	dihydroxyacetone phosphate acyltransferase(LOC101468804)	20	6849619	6876589
ctnnbip1	101468805	catenin, beta interacting protein 1(ctnnbip1)	20	4903490	4928729
LOC101468806	101468806	hairy-related 3(her3)	20	6908754	6909784
LOC101468893	101468893	nuclear receptor subfamily 1, group D, member 4a(nr1d4a)	20	2194754	2206801
LOC101469003	101469003	disco-interacting protein 2 homolog Ba(dip2ba)	20	3436532	3481822
pik3cd	101469095	phosphatidylinositol-4,5-bisphosphate 3-kinase, catalytic subunit delta(pik3cd)	20	4882757	4902248
LOC101469096	101469096	taste receptor type 1 member 1-like(LOC101469096)	20	6896106	6901694
LOC101469110	101469110	toll-like receptor 9(tlr9)	20	445111	450363
tmem201	101469395	transmembrane protein 201(tmem201)	20	4864099	4876194
ttc34	101469396	tetratricopeptide repeat domain 34(ttc34)	20	6114885	6123325
LOC101469494	101469494	transmembrane protease serine 12-like(LOC101469494)	20	3428769	3433401
LOC101469581	101469581	calcium binding and coiled-coil domain 1a(calcoco1a)	20	2135422	2149341
LOC101469582	101469582	acylaminoacyl-peptide hydrolase(apeh)	20	437111	444775
rer1	101469661	retention in endoplasmic reticulum sorting receptor 1(rer1)	20	6832632	6840293
LOC101469760	101469760	sodium channel, voltage gated, type VIII, alpha subunit a(scn8aa)	20	3382920	3428175
LOC101469848	101469848	forkhead box L2-like(foxl2l)	20	4862025	4863399
hoxc13	101469865	homeobox C13a(hoxc13a)	20	2081272	2085262
LOC101470040	101470040	fidgetin like 2(fignl2)	20	3325172	3338198
LOC101470041	101470041	capping actin protein of muscle Z-line subunit alpha 1b(capza1b)	20	431649	436685
hes4	101470131	hairy-related 9(her9)	20	4809170	4811128
hoxc12	101470151	homeobox C12a(hoxc12a)	20	2070700	2074417
LOC101470228	101470228	WAP four-disulfide core domain 2(wfdc2)	20	5875961	5886726
LOC101470322	101470322	taste receptor type 1 member 1-like(LOC101470322)	20	6840383	6844639
LOC101470331	101470331	CTTNBP2 N-terminal like b(cttnbp2nlb)	20	416658	431549
hoxc11	101470437	homeobox C11a(hoxc11a)	20	2058100	2061315
pex14	101470520	peroxisomal biogenesis factor 14(pex14)	20	5349131	5394275
LOC101470531	101470531	major intrinsic protein of lens fiber a(mipa)	20	3285257	3289285
tprg1l	101470614	tumor protein p63 regulated 1-like(tprg1l)	20	6786544	6790973
LOC101470615	101470615	PPARGC1 and ESRR induced regulator, muscle 1(perm1)	20	4736154	4743624
kcnd3	101470631	potassium voltage-gated channel, Shal-related subfamily, member 3(kcnd3)	20	183982	301358
LOC101470732	101470732	homeobox C10a(hoxc10a)	20	2048916	2051833
kif1b	101470824	kinesin family member 1B(kif1b)	20	5025374	5087612
LOC101470833	101470833	signal transducer and activator of transcription 6, interleukin-4 induced(stat6)	20	3289395	3313414
wrap73	101470921	WD repeat containing, antisense to TP73(wrap73)	20	6790686	6807796
noc2l	101470922	NOC2-like nucleolar associated transcriptional repressor(noc2l)	20	4671839	4693611
plekhn1	101471094	pleckstrin homology domain containing, family N member 1(plekhn1)	20	4722332	4735050
LOC101471106	101471106	prostaglandin E synthase 3a (cytosolic)(ptges3a)	20	3279027	3282922
klhl17	101471193	kelch-like family member 17(klhl17)	20	4693707	4708481
LOC101471202	101471202	homeobox protein HOX3-like(LOC101471202)	20	1994457	1997190
tp73	101471388	tumor protein p73(tp73)	20	6805487	6832569
dtx3	101471402	deltex E3 ubiquitin ligase 3(dtx3)	20	3265723	3270878
hoxc5	101471491	homeobox C5a(hoxc5a)	20	2016775	2019703
samd11	101471684	sterile alpha motif domain containing 11(samd11)	20	4620655	4670848
LOC101471685	101471685	ataxin 7-like 2b(atxn7l2b)	20	4145117	4151150
hoxc6	101471784	homeobox C6a(hoxc6a)	20	2020496	2022736
ddx20	101471888	DEAD (Asp-Glu-Ala-Asp) box polypeptide 20(ddx20)	20	169625	178629
LOC101472065	101472065	Rho family GTPase 1b(rnd1b)	20	3241311	3251557
LOC101472162	101472162	transmembrane prolyl 4-hydroxylase(LOC101472162)	20	102041	115037
hoxc8	101472261	homeobox C8a(hoxc8a)	20	2031598	2035232
LOC101472360	101472360	calcium channel, voltage-dependent, beta 3b(cacnb3b)	20	3203536	3227265
hoxc9	101472568	homeobox C9a(hoxc9a)	20	2038651	2041134
LOC101472665	101472665	cyclin-dependent kinase 17(LOC101472665)	20	114863	162369
prdm16	101472744	PR domain containing 16(prdm16)	20	6599038	6773173
hoxc4	101472851	homeobox C4(hoxc4)	20	1996937	2048828
rere	101472943	arginine-glutamic acid dipeptide (RE) repeats a(rerea)	20	4441802	4572265
LOC101473251	101473251	elastase 2(ela2)	20	6531439	6533891
LOC101473262	101473262	adenylate cyclase 6b(adcy6b)	20	3158081	3191157
nfe2	101473441	nuclear factor, erythroid 2(nfe2)	20	1932518	1937447
LOC101473551	101473551	UDP-N-acetyl-alpha-D-galactosamine:polypeptide N-acetylgalactosaminyltransferase 6 (GalNAc-T6)(galnt6)	20	3149023	3157577
LOC101473715	101473715	elastase 2 like(ela2l)	20	6527073	6530124
LOC101473844	101473844	glucose-6-phosphate 1-dehydrogenase(LOC101473844)	20	3143606	3148432
LOC101473935	101473935	sodium- and chloride-dependent creatine transporter 1(si:ch211-117c9.5)	20	87101	101460
LOC101474019	101474019	transmembrane protein 51a(tmem51a)	20	6515298	6521584
eno1	101474020	enolase 1a, (alpha)(eno1a)	20	4430475	4439033
LOC101474144	101474144	ceramide kinase family protein(zgc:158263)	20	3136976	3143353
hnrnpa1	101474145	heterogeneous nuclear ribonucleoprotein A1b(hnrnpa1b)	20	1937417	1941028
kazn	101474313	kazrin, periplakin interacting protein(kazn)	20	6318349	6502410
naa10	101474430	N-alpha-acetyltransferase 10, NatA catalytic subuni(naa10)	20	3129659	3132947
cbx5	101474431	chromobox homolog 5 (HP1 alpha homolog, Drosophila)(cbx5)	20	1941606	1945144
LOC101474695	101474695	solute carrier family 2, facilitated glucose transporter member 5(LOC101474695)	20	4388652	4400309
copz1	101474710	COPI coat complex subunit zeta 1(copz1)	20	1922434	1927146
LOC101474876	101474876	rho GTPase-activating protein 4(LOC101474876)	20	3120691	3129383
LOC101474992	101474992	zinc finger protein 740b(znf740b)	20	1901835	1911391
lhfpl5	101475069	LHFPL tetraspan subfamily member 5b(lhfpl5b)	20	3682279	3686556
LOC101475268	101475268	solute carrier family 2, facilitated glucose transporter member 5-like(LOC101475268)	20	4406439	4414204
LOC101475356	101475356	PR domain containing 2, with ZNF domain a(prdm2a)	20	6301917	6310241
ssr4	101475368	signal sequence receptor, delta(ssr4)	20	3115376	3119328
srpk1	101475369	SRSF protein kinase 1a(srpk1a)	20	3666182	3681685
LOC101475462	101475462	cysteine sulfinic acid decarboxylase(csad)	20	1894881	1901580
ca6	101475568	carbonic anhydrase VI(ca6)	20	4400457	4419047
pdpn	101475665	uncharacterized LOC101475665(si:ch211-156j16.1)	20	6285053	6295483
LOC101475676	101475676	arginine vasopressin receptor 2a, duplicate a(avpr2aa)	20	3093307	3109305
huwe1	101475677	HECT, UBA and WWE domain containing E3 ubiquitin protein ligase 1(huwe1)	20	2956045	3007562
gpr157	101475858	G protein-coupled receptor 157(gpr157)	20	4377004	4386554
idh3g	101475963	isocitrate dehydrogenase (NAD(+)) 3 non-catalytic subunit gamma(idh3g)	20	3069244	3075504
LOC101475964	101475964	protein FAM19A2(LOC101475964)	20	1589992	1685799
wnt1	101475965	wingless-type MMTV integration site family, member 1(wnt1)	20	2435180	2441052
LOC101476151	101476151	forkhead box protein J3(LOC101476151)	20	6209380	6283810
LOC101476262	101476262	homeobox C1a(hoxc1a)	20	1979677	1985263
fam3a	101476459	FAM3 metabolism regulating signaling molecule A(fam3a)	20	3062969	3069030
LOC101476551	101476551	protein Wnt-2b-A(LOC101476551)	20	1495197	1511102
LOC101476552	101476552	uncharacterized LOC101476552(zgc:174906)	20	1889663	1893584
spsb1	101476629	splA/ryanodine receptor domain and SOCS box containing 1(spsb1)	20	4346931	4356209
wnk3	101476745	WNK lysine deficient protein kinase 3(si:dkey-151g10.3)	20	3021082	3061158
tkt	101476820	transketolase(tkt)	20	7621513	7634524
LOC101476830	101476830	FKBP prolyl isomerase like(fkbpl)	20	1475502	1479138
LOC101476831	101476831	putative helicase mov-10-B.2(LOC101476831)	20	1532888	1547872
slc25a33	101476904	solute carrier family 25 member 33(slc25a33)	20	4335607	4343061
LOC101477107	101477107	uncharacterized oxidoreductase At1g06690, chloroplastic(LOC101477107)	20	7613536	7618733
LOC101477116	101477116	TEA domain family member 3 a(tead3a)	20	1257092	1273512
zmynd12	101477187	zinc finger, MYND-type containing 12(zmynd12)	20	6180094	6187662
LOC101477188	101477188	uncharacterized LOC101477188(LOC101477188)	20	4323337	4331170
ebp	101477298	EBP cholestenol delta-isomerase(ebp)	20	1466920	1469051
LOC101477390	101477390	patatin-like phospholipase domain-containing protein 2(LOC101477390)	20	1181108	1182797
LOC101477475	101477475	ribosomal modification protein rimK-like family member A(rimkla)	20	6187757	6206138
emd	101477476	emerin (Emery-Dreifuss muscular dystrophy)(emd)	20	4314296	4321270
nsun5	101477574	NOP2/Sun RNA methyltransferase 5(nsun5)	20	7610301	7613368
ccdc115	101477583	coiled-coil domain containing 115(ccdc115)	20	1462823	1465500
LOC101477753	101477753	epithelial membrane protein 3(LOC101477753)	20	6177287	6179883
LOC101477754	101477754	high mobility group nucleosome-binding domain-containing protein 5(si:dkey-183p4.10)	20	4310066	4313345
LOC101477861	101477861	v-myb avian myeloblastosis viral oncogene homolog-like 2a(mybl2a)	20	7576365	7596822
LOC101477867	101477867	zinc finger BED domain-containing protein 4(si:dkey-109j17.5)	20	1457742	1462396
LOC101477967	101477967	ERC protein 2(LOC101477967)	20	450356	611431
znf362	101478041	zinc finger protein 362b(znf362b)	20	6161518	6172780
phf8	101478139	PHD finger protein 8(phf8)	20	3007732	3019668
LOC101478140	101478140	hemicentin-1(LOC101478140)	20	1442935	1454467
LOC101478241	101478241	parapinopsin-like(LOC101478241)	20	163673	166295
sgk2	101478315	serum/glucocorticoid regulated kinase 2a(sgk2a)	20	7559053	7572234
LOC101478504	101478504	TRAF3-interacting JNK-activating modulator(LOC101478504)	20	4300454	4305891
l1cam	101478519	L1 cell adhesion molecule, paralog a(l1cama)	20	2896181	2942537
atp5pb	101478780	ATP synthase peripheral stalk-membrane subunit b(atp5pb)	20	4294811	4299932
LOC101478792	101478792	apolipoprotein B mRNA editing enzyme, catalytic polypeptide-like 2b(apobec2b)	20	1453782	1456399
LOC101478974	101478974	L3MBTL histone methyl-lysine binding protein 1(l3mbtl1)	20	7538932	7554111
LOC101479071	101479071	EPS8-like 3b(eps8l3b)	20	4283494	4294555
LOC101479080	101479080	myosin binding protein Ha(mybpha)	20	1420511	1440564
LOC101479156	101479156	tumor necrosis factor receptor superfamily member 1A(si:ch211-112c15.8)	20	6126955	6139757
ribc1	101479355	RIB43A domain with coiled-coils 1(ribc1)	20	2891139	2896079
LOC101479356	101479356	cysteine and glycine-rich protein 1a(csrp1a)	20	1324684	1333814
LOC101479547	101479547	glutathione S-transferase Mu 3-like(LOC101479547)	20	4280250	4283351
LOC101479627	101479627	aminolevulinate, delta-, synthase 2(alas2)	20	6107627	6114609
smc1a	101479638	structural maintenance of chromosomes 1A(smc1a)	20	2878415	2891044
LOC101479639	101479639	neuron navigator 1(LOC101479639)	20	1340009	1420267
LOC101479823	101479823	glutathione S-transferase Mu 3(LOC101479823)	20	4268889	4273332
LOC101479901	101479901	N-terminal EF-hand calcium-binding protein 1(LOC101479901)	20	6084151	6105426
cacna1s	101479917	calcium voltage-gated channel subunit alpha1 S(cacna1s)	20	2860162	2878051
LOC101480010	101480010	serine/arginine-rich splicing factor 6(LOC101480010)	20	7533868	7538807
LOC101480121	101480121	pleckstrin homology-like domain, family A, member 3(phlda3)	20	1321029	1323463
LOC101480204	101480204	large neutral amino acids transporter small subunit 1(LOC101480204)	20	6063680	6075038
eif2s2	101480306	eukaryotic translation initiation factor 2, subunit 2 beta(eif2s2)	20	7524868	7529949
LOC101480307	101480307	adenosine monophosphate deaminase 2b(ampd2b)	20	4228647	4248448
tmem9	101480412	transmembrane protein 9(tmem9)	20	2855521	2859431
LOC101480413	101480413	troponin I type 1a (skeletal, slow)(tnni1a)	20	1309543	1314132
LOC101480694	101480694	TOX high mobility group box family member 2(LOC101480694)	20	5973900	6059603
LOC101480705	101480705	complement component 1, q subcomponent-like 4(c1ql4a)	20	2826817	2836622
lad1	101480706	ladinin(lad1)	20	1301730	1308698
LOC101480787	101480787	charged multivesicular body protein 4b(LOC101480787)	20	7517477	7523089
LOC101480989	101480989	uncharacterized LOC101480989(zgc:153867)	20	2818808	2824222
LOC101480990	101480990	troponin T type 2a (cardiac)(tnnt2a)	20	1293594	1301396
gnas	101481065	GNAS complex locus(gnas)	20	7480395	7504603
pkp1	101481283	plakophilin 1(pkp1)	20	1277280	1292129
LOC101481364	101481364	vesicle-associated membrane protein-associated protein B(LOC101481364)	20	7507258	7517021
LOC101481365	101481365	coiled-coil domain containing 30(ccdc30)	20	5926810	5941616
LOC101481561	101481561	guanine nucleotide binding protein (G protein), alpha transducing activity polypeptide 2(gnat2)	20	4213707	4219608
neurod4	101481676	neuronal differentiation 4(neurod4)	20	2805702	2808577
LOC101481766	101481766	transcription factor Spi-B-like(LOC101481766)	20	1232222	1237957
atp5f1e	101481842	ATP synthase F1 subunit epsilon(atp5f1e)	20	7438533	7440097
LOC101481843	101481843	guanine nucleotide binding protein (G protein), alpha inhibiting activity polypeptide 3(gnai3)	20	4192378	4213604
LOC101481959	101481959	baculoviral IAP repeat containing 5b(birc5b)	20	2798632	2800955
LOC101482146	101482146	G protein-coupled receptor 61(gpr61)	20	4182579	4186651
LOC101482250	101482250	zinc finger protein 385A(znf385a)	20	2738853	2791248
LOC101482326	101482326	PRELI domain containing protein 3B(LOC101482326)	20	7430078	7434682
pigt	101482443	phosphatidylinositol glycan anchor biosynthesis, class T(pigt)	20	5862319	5874679
LOC101482444	101482444	adhesion molecule with Ig-like domain 1(amigo1)	20	4154354	4160336
LOC101482612	101482612	BPI fold containing family C, like(bpifcl)	20	7423025	7428706
sycp2	101482726	synaptonemal complex protein 2(sycp2)	20	5809521	5826905
LOC101482727	101482727	synaptophysin-like 2b(sypl2b)	20	4141131	4144557
LOC101482738	101482738	core 1 synthase, glycoprotein-N-acetylgalactosamine 3-beta-galactosyltransferase, 1a(c1galt1a)	20	2700223	2707458
LOC101482923	101482923	vesicular inhibitory amino acid transporter(LOC101482923)	20	7418686	7422352
LOC101483020	101483020	phosphatase and actin regulator 3a(phactr3a)	20	5826961	5861525
lgr6	101483109	leucine rich repeat containing G protein-coupled receptor 6(lgr6)	20	1199825	1222328
actr5	101483206	actin related protein 5(actr5)	20	7402418	7408508
LOC101483207	101483207	sortilin 1b(sort1b)	20	4117083	4133303
LOC101483491	101483491	NDUFA4 mitochondrial complex associated like 2a(ndufa4l2a)	20	7390561	7399931
nfya	101483492	nuclear transcription factor Y, alpha, like(nfyal)	20	4107144	4114222
LOC101483501	101483501	beta-1,4-N-acetyl-galactosaminyl transferase 1a(b4galnt1a)	20	2652500	2675131
znf335	101483586	zinc finger protein 335(znf335)	20	3882869	3894919
ube2t	101483587	ubiquitin-conjugating enzyme E2T (putative)(ube2t)	20	1195296	1199726
LOC101483687	101483687	protein phosphatase 1, regulatory subunit 3Da(ppp1r3da)	20	5805641	5807150
LOC101483798	101483798	solute carrier family 26 member 10(slc26a10)	20	2640373	2647274
mmp9	101483885	matrix metallopeptidase 9(mmp9)	20	3877604	3881990
LOC101483974	101483974	family with sequence similarity 217 member Ba(fam217ba)	20	5801569	5805442
LOC101484072	101484072	ETS variant transcription factor 7(etv7)	20	1185949	1191408
LOC101484151	101484151	adenosine A1 receptor b(adora1b)	20	3858481	3863542
LOC101484251	101484251	serine hydroxymethyltransferase, mitochondrial(LOC101484251)	20	7377645	7385846
ttll9	101484252	tubulin tyrosine ligase-like family, member 9(ttll9)	20	5797493	5801322
LOC101484343	101484343	Sp5 transcription factor-like(sp5l)	20	2613665	2616203
dclre1b	101484429	DNA cross-link repair 1B(dclre1b)	20	3825614	3830118
LOC101484518	101484518	kinesin family member 5A, a(kif5aa)	20	7306672	7326554
LOC101484519	101484519	endothelin-3(LOC101484519)	20	5771716	5779542
LOC101484609	101484609	Rho guanine nucleotide exchange factor (GEF) 25a(arhgef25a)	20	2570345	2612710
LOC101484713	101484713	uncharacterized LOC101484713(zgc:194242)	20	1191418	1194134
LOC101484798	101484798	methyl-CpG binding domain protein 6(mbd6)	20	7327278	7344673
LOC101484799	101484799	band 4.1-like protein 1(si:dkey-178k16.1)	20	5708709	5756612
LOC101485081	101485081	contactin 3a, tandem duplicate 1(cntn3a.1)	20	5627260	5706568
LOC101485096	101485096	copine Va(cpne5a)	20	3713705	3809564
stac3	101485287	SH3 and cysteine rich domain 3(stac3)	20	7345236	7351735
LOC101485468	101485468	potassium voltage-gated channel subfamily A member 10(LOC101485468)	20	1148541	1163950
LOC101485553	101485553	uncharacterized LOC101485553(LOC101485553)	20	7267204	7294353
LOC101485554	101485554	neural cell adhesion molecule L1-like protein(LOC101485554)	20	5518744	5567359
LOC101485563	101485563	mitogen-activated protein kinase 14a(mapk14a)	20	3645370	3665116
ngrn	101485641	neugrin, neurite outgrowth associated(ngrn)	20	4114536	4115919
LOC101485653	101485653	ankyrin repeat domain 33Aa(ankrd33aa)	20	2558455	2564438
LOC101485756	101485756	potassium voltage-gated channel, shaker-related subfamily, member 2b(kcna2b)	20	1133539	1140254
rprd1b	101485827	regulation of nuclear pre-mRNA domain containing 1B(rprd1b)	20	7255126	7261274
ahcyl1	101485913	adenosylhomocysteinase-like 1(ahcyl1)	20	4088297	4105182
LOC101485924	101485924	activin A receptor type 1Ba(acvr1ba)	20	2526776	2541998
LOC101486031	101486031	contactin 3a, tandem duplicate 2(cntn3a.2)	20	5458994	5503547
LOC101486042	101486042	potassium voltage-gated channel subfamily A member 3(LOC101486042)	20	1120687	1125494
LOC101486234	101486234	activin A receptor like type 1(acvrl1)	20	2544782	2555081
LOC101486328	101486328	hairy-related 12(her12)	20	7245701	7246780
exosc10	101486329	exosome component 10(exosc10)	20	5444779	5456985
LOC101486340	101486340	nerve growth factor a (beta polypeptide)(ngfa)	20	1020046	1043218
LOC101486419	101486419	heat shock protein family A (Hsp70) member 1B(hspa1b)	20	4085292	4087949
kmt2d	101486529	lysine (K)-specific methyltransferase 2D(kmt2d)	20	2492710	2523991
LOC101486618	101486618	transcription factor HES-5(LOC101486618)	20	7239812	7241499
srm	101486619	spermidine synthase(srm)	20	5432103	5435094
lg20h1orf194	101486628	linkage group 20 C1orf194 homolog(lg20h1orf194)	20	3631070	3633640
LOC101486629	101486629	tetraspanin-2(LOC101486629)	20	1003463	1014701
kcnc4	101486708	potassium voltage-gated channel, Shaw-related subfamily, member 4(kcnc4)	20	4058013	4083715
dhh	101486812	desert hedgehog signaling molecule(dhh)	20	2484335	2489703
LOC101486892	101486892	somatostatin family member 7(sst7)	20	5428588	5429737
LOC101486902	101486902	mitochondrial glutamate carrier 1(LOC101486902)	20	998066	1002588
slc6a17	101486993	solute carrier family 6 member 17(slc6a17)	20	4021523	4045791
kiaa1324	101487099	endosome-lysosome associated apoptosis and autophagy regulator 1(elapor1)	20	3633561	3644002
LOC101487100	101487100	IKAROS family zinc finger 4(ikzf4)	20	2454931	2462157
ubr4	101487176	ubiquitin protein ligase E3 component n-recognin 4(ubr4)	20	7181136	7236078
masp2	101487177	MBL associated serine protease 2(masp2)	20	5405219	5408808
alx3	101487278	ALX homeobox 3(alx3)	20	3990032	3995223
LOC101487391	101487391	CaM kinase-like vesicle-associated, like(camkvl)	20	939156	985059
rbm15	101487563	RNA binding motif protein 15(rbm15)	20	3982530	3987332
emc1	101487655	ER membrane protein complex subunit 1(emc1)	20	7168795	7180172
dffa	101487656	DNA fragmentation factor, alpha polypeptide(dffa)	20	5396189	5402701
LOC101487677	101487677	uncharacterized LOC101487677(zgc:195245)	20	3611177	3615459
uba1	101487678	ubiquitin-like modifier activating enzyme 1(uba1)	20	922579	938734
dnajc22	101487769	DnaJ (Hsp40) homolog, subfamily C, member 22(dnajc22)	20	2462261	2464230
slc16a4	101487851	solute carrier family 16 member 4(slc16a4)	20	3953683	3978913
casz1	101487947	castor zinc finger 1(casz1)	20	5254421	5326884
inava	101487960	innate immunity activator a(inavaa)	20	3600855	3609820
LOC101488122	101488122	ERBB receptor feedback inhibitor 1(LOC101488122)	20	7160470	7168220
lamtor5	101488123	late endosomal/lysosomal adaptor, MAPK and MTOR activator 5(lamtor5)	20	3936166	3940817
LOC101488135	101488135	Rho guanine nucleotide exchange factor (GEF) 3, like(arhgef3l)	20	916854	922065
LOC105940972	105940972	tumor necrosis factor receptor superfamily member 16-like(LOC105940972)	20	6154247	6158126
LOC105940975	105940975	complement C1q-like protein 4(LOC105940975)	20	6774644	6781472
LOC105941080	105941080	uncharacterized LOC105941080(LOC105941080)	20	2128533	2139618
LOC106674504	106674504	adenosine receptor A3(LOC106674504)	20	1238097	1240198
LOC106674625	106674625	uncharacterized LOC106674625(LOC106674625)	20	6235075	6245946
LOC106674641	106674641	retrovirus-related Pol polyprotein from transposon 412(LOC106674641)	20	2677139	2681880
LOC106675029	106675029	uncharacterized LOC106675029(LOC106675029)	20	3726941	3738470
LOC106675032	106675032	uncharacterized LOC106675032(LOC106675032)	20	1730434	1731084
LOC106675341	106675341	uncharacterized LOC106675341(LOC106675341)	20	1096043	1098172
LOC106675752	106675752	keratin-associated protein 10-7-like(LOC106675752)	20	5897719	5921368
prok1	111500408	prokineticin 1(prok1)	20	3928921	3930388
LOC111500412	111500412	neurexophilin-2(LOC111500412)	20	7371258	7377520
LOC111500413	111500413	U5 spliceosomal RNA(LOC111500413)	20	7368287	7368400
LOC111500414	111500414	U5 spliceosomal RNA(LOC111500414)	20	7357715	7357828
LOC111500417	111500417	U5 spliceosomal RNA(LOC111500417)	20	7355333	7355447
LOC111500418	111500418	U5 spliceosomal RNA(LOC111500418)	20	7362698	7362812
LOC111500419	111500419	U5 spliceosomal RNA(LOC111500419)	20	7367641	7367755
LOC111500661	111500661	uncharacterized LOC111500661(LOC111500661)	20	1240059	1246628
LOC111500662	111500662	5S ribosomal RNA(LOC111500662)	20	1761125	1761243
LOC111500663	111500663	small nucleolar RNA U6-53/MBII-28(LOC111500663)	20	924124	924245
LOC111500664	111500664	small Cajal body-specific RNA 2(LOC111500664)	20	3617297	3617658
trnac-gca	111500665	transfer RNA cysteine (anticodon GCA)(trnac-gca)	20	3202041	3202112
trnaf-gaa	111500666	transfer RNA phenylalanine (anticodon GAA)(trnaf-gaa)	20	1470401	1470473
trnah-gug	111500667	transfer RNA histidin (anticodon GUG)(trnah-gug)	20	1466336	1466407
trnac-gca	111500668	transfer RNA cysteine (anticodon GCA)(trnac-gca)	20	3101252	3101323
trnae-uuc	111500669	transfer RNA glutamic acid (anticodon UUC)(trnae-uuc)	20	1465855	1465926
trnac-gca	111500670	transfer RNA cysteine (anticodon GCA)(trnac-gca)	20	3186109	3186180
trnac-gca	111500671	transfer RNA cysteine (anticodon GCA)(trnac-gca)	20	3182544	3182615
LOC111501497	111501497	uncharacterized LOC111501497(LOC111501497)	20	1107724	1113275
rbp7	112429683	retinol binding protein 7a, cellular(rbp7a)	20	5001926	5003318
LOC112429724	112429724	kazrin-A-like(LOC112429724)	20	6504535	6512133
LOC112429728	112429728	deoxyribonuclease I-like 1-like(dnase1l1l)	20	4308171	4310052
LOC112430114	112430114	uncharacterized LOC112430114(LOC112430114)	20	3903654	3911108
LOC112430115	112430115	uncharacterized LOC112430115(LOC112430115)	20	3915066	3916853
LOC112430118	112430118	uncharacterized LOC112430118(LOC112430118)	20	3902393	3902918
LOC112430119	112430119	U5 spliceosomal RNA(LOC112430119)	20	7358361	7358474
LOC112436625	112436625	uncharacterized LOC112436625(LOC112436625)	20	1741787	1742343
LOC112436628	112436628	trichohyalin-like(LOC112436628)	20	7586024	7588437
LOC112436629	112436629	uncharacterized LOC112436629(LOC112436629)	20	1736118	1736755
LOC112436630	112436630	uncharacterized LOC112436630(LOC112436630)	20	3941005	3947439
LOC112436639	112436639	uncharacterized LOC112436639(LOC112436639)	20	2729384	2731611
LOC112436640	112436640	uncharacterized LOC112436640(LOC112436640)	20	2731613	2731987
LOC112436648	112436648	uncharacterized LOC112436648(LOC112436648)	20	2684465	2685657
LOC112436651	112436651	uncharacterized LOC112436651(LOC112436651)	20	4713352	4713551
LOC112436652	112436652	uncharacterized LOC112436652(LOC112436652)	20	4713672	4714001
LOC112436654	112436654	rho-related GTP-binding protein RhoA-D(LOC112436654)	20	1548070	1571022
LOC112436656	112436656	uncharacterized LOC112436656(LOC112436656)	20	7600541	7602612
LOC112436657	112436657	uncharacterized LOC112436657(LOC112436657)	20	7589583	7591017
LOC112436660	112436660	polyamine-modulated factor 1-binding protein 1-like(LOC112436660)	20	7604946	7606670
LOC112436684	112436684	low-density lipoprotein receptor-related protein 1-like(LOC112436684)	20	2334317	2342720

## Sheet: Pelvic-snout LG12 NC_036791.1
NC_036791.1:13138786-33910551
NCBI Gene symbol	NCBI Gene ID	DAVID Gene Name	Chromosome #	START	STOP
clip1	101463599	CAP-GLY domain containing linker protein 1a(clip1a)	12	18537576	18563132
fbxw8	101463690	F-box and WD repeat domain containing 8(fbxw8)	12	28193198	28215549
cdk7	101463697	cyclin-dependent kinase 7(cdk7)	12	17452213	17458989
tmem119	101463699	transmembrane protein 119a(tmem119a)	12	16397222	16401393
znf131	101463711	zinc finger protein 131(znf131)	12	21916698	21923202
nr2f1	101463792	nuclear receptor subfamily 2, group F, member 1a(nr2f1a)	12	14460991	14469511
LOC101463845	101463845	STAM-binding protein-like A(LOC101463845)	12	31488704	31497746
itga2	101463902	integrin, alpha 2 (CD49B, alpha 2 subunit of VLA-2 receptor), tandem duplicate 2(itga2.2)	12	24843624	24866506
fbxo21	101463987	F-box protein 21(fbxo21)	12	28177000	28185017
setbp1	101463993	SET binding protein 1(setbp1)	12	17407203	17445193
sart3	101463994	spliceosome associated factor 3, U4/U6 recycling protein(sart3)	12	16378756	16388864
LOC101464010	101464010	DAB2 interacting protein a(dab2ipa)	12	32820083	32856045
lrrc43	101464096	leucine rich repeat containing 43(lrrc43)	12	18566902	18581995
LOC101464110	101464110	homeobox protein orthopedia B-like(LOC101464110)	12	23564965	23569460
ubqln1	101464112	ubiquilin 1(ubqln1)	12	19520135	19530277
LOC101464144	101464144	solute carrier family 39 member 14(slc39a14)	12	31456680	31486497
paip1	101464198	poly(A) binding protein interacting protein 1(paip1)	12	24827618	24835896
LOC101464285	101464285	solute carrier family 14 member 2(slc14a2)	12	17360708	17367529
iscu	101464286	iron-sulfur cluster assembly enzyme(iscu)	12	16388899	16391569
LOC101464299	101464299	PHD finger protein 19(phf19)	12	32812499	32819761
LOC101464334	101464334	protein HIRA(LOC101464334)	12	28971051	28994002
ascc2	101464420	activating signal cointegrator 1 complex subunit 2(ascc2)	12	31440704	31455255
tesc	101464460	tescalcin a(tesca)	12	28185024	28193194
fgf10	101464481	fibroblast growth factor 10(fgf10)	12	24816385	24823358
LOC101464558	101464558	leucyl/cystinyl aminopeptidase(lnpep)	12	17334562	17352911
ficd	101464560	FIC domain protein adenylyltransferase(ficd)	12	16375723	16378385
mlxip	101464561	MLX interacting protein(mlxip)	12	18598152	18626424
LOC101464577	101464577	betaine--homocysteine S-methyltransferase 1(LOC101464577)	12	23471601	23475453
selenop	101464578	selenoprotein P(selenop)	12	21907226	21910772
gkap1	101464579	G kinase anchoring protein 1(gkap1)	12	19513289	19519413
nudt12	101464617	nudix (nucleoside diphosphate linked moiety X)-type motif 12(nudt12)	12	28941869	28946893
LOC101464774	101464774	regulator of G-protein signaling 3(LOC101464774)	12	32741138	32770812
pdxp	101464860	pyridoxal (pyridoxine, vitamin B6) phosphatase(pdxp)	12	23462814	23465642
LOC101464862	101464862	growth hormone receptor a(ghra)	12	21875665	21904624
LOC101464901	101464901	ring finger protein 215(rnf215)	12	31433069	31439718
LOC101464944	101464944	NF2, moesin-ezrin-radixin like (MERLIN) tumor suppressor a(nf2a)	12	28143211	28175817
wdr66	101465049	cilia and flagella associated protein 251(cfap251)	12	18626847	18638494
LOC101465064	101465064	1-acylglycerol-3-phosphate O-acyltransferase 9, like(agpat9l)	12	24781526	24787901
LOC101465095	101465095	interleukin-6 receptor subunit beta(LOC101465095)	12	28946966	28969446
LOC101465137	101465137	ultraviolet-B receptor UVR8(LOC101465137)	12	14486284	14795107
mrps36	101465155	mitochondrial ribosomal protein S36(mrps36)	12	23465952	23470717
LOC101465195	101465195	protein unc-13 homolog B(LOC101465195)	12	31226762	31405191
LOC101465233	101465233	calcium-binding protein 7(LOC101465233)	12	28069405	28096437
erap2	101465238	endoplasmic reticulum aminopeptidase 2(erap2)	12	17323752	17333299
LOC101465333	101465333	rab5 GDP/GTP exchange factor(LOC101465333)	12	18639381	18644217
LOC101465346	101465346	ADAM metallopeptidase with thrombospondin type 1 motif, 12(adamts12)	12	24790636	24809415
kif27	101465349	kinesin family member 27(kif27)	12	19499976	19512870
LOC101465439	101465439	LIF receptor subunit alpha a(lifra)	12	23426332	23445050
LOC101465468	101465468	polyubiquitin-like(LOC101465468)	12	16514437	16517220
rgmb	101465521	repulsive guidance molecule BMP co-receptor b(rgmb)	12	17312595	17321369
fbxo4	101465529	F-box protein 4(fbxo4)	12	21865070	21868794
LOC101465564	101465564	solute carrier family 12 member 2(LOC101465564)	12	28921487	28940881
LOC101465610	101465610	arrestin domain-containing protein 3(LOC101465610)	12	14801839	14809459
psmd9	101465612	proteasome 26S subunit, non-ATPase 9(psmd9)	12	18645381	18649691
gck	101465626	glucokinase (hexokinase 4)(gck)	12	24760883	24770152
lg12h9orf64	101465628	linkage group 12 C9orf64 homolog(lg12h9orf64)	12	19493101	19498601
LOC101465632	101465632	myosin light chain 1, cardiac muscle pseudogene(LOC101465632)	12	32737452	32738368
LOC101465704	101465704	transmembrane protein 17A(zgc:112294)	12	28048274	28050304
LOC101465760	101465760	GTPase IMAP family member 8(LOC101465760)	12	32473576	32479192
riok2	101465821	RIO kinase 2 (yeast)(riok2)	12	17247634	17254237
lg12h5orf51	101465834	rab7a interacting mon1-ccz1 complex subunit 1(rimoc1)	12	21858550	21864948
tex43	101465865	testis expressed 43(tex43)	12	28914785	28917125
LOC101465916	101465916	arrestin domain-containing protein 3(LOC101465916)	12	14822857	14829242
gtf2h3	101465917	general transcription factor IIH, polypeptide 3(gtf2h3)	12	18649973	18655598
cep78	101465936	centrosomal protein 78(cep78)	12	23408283	23418192
hnrnpk	101465937	heterogeneous nuclear ribonucleoprotein K(hnrnpk)	12	19477701	19491545
endog	101465942	endonuclease G(endog)	12	32697893	32704321
LOC101465975	101465975	chromatin modification-related protein eaf-1(LOC101465975)	12	31220206	31222346
LOC101466006	101466006	selenoprotein e(selenoe)	12	28046217	28048023
ykt6	101466113	YKT6 v-SNARE homolog (S. cerevisiae)(ykt6)	12	24755805	24760795
gramd2b	101466161	GRAM domain containing 2B(gramd2b)	12	28896320	28908950
ntng2	101466225	netrin g2a(ntng2a)	12	32667965	32688592
rusc2	101466259	RUN and SH3 domain containing 2(rusc2)	12	31174659	31213900
scarf2	101466297	scavenger receptor class F, member 2(scarf2)	12	28016829	28035426
LOC101466305	101466305	protein limb expression 1(LOC101466305)	12	17241750	17246777
limk2	101466306	LIM domain kinase 2(limk2)	12	17638961	17657105
oxct1	101466319	3-oxoacid CoA transferase 1a(oxct1a)	12	21800374	21855360
LOC101466403	101466403	aquaporin-3(LOC101466403)	12	14873265	14880057
LOC101466407	101466407	Rieske domain-containing protein(LOC101466407)	12	18656044	18658974
cep120	101466549	centrosomal protein 120(cep120)	12	28780468	28814404
LOC101466578	101466578	proline dehydrogenase (oxidase) 1b(prodhb)	12	28003586	28015661
dnajb5	101466585	DnaJ heat shock protein family (Hsp40) member B5(dnajb5)	12	17204557	17216938
pik3ip1	101466586	phosphoinositide-3-kinase interacting protein 1(pik3ip1)	12	17659522	17666350
plcxd3	101466599	phosphatidylinositol-specific phospholipase C, X domain containing 3(plcxd3)	12	21780593	21797384
LOC101466689	101466689	kinesin-like protein KIF24(LOC101466689)	12	18660718	18671436
LOC101466867	101466867	complement component 7a(c7a)	12	21765840	21772233
slc28a3	101466868	solute carrier family 28 member 3(slc28a3)	12	19370762	19416220
med27	101466876	mediator complex subunit 27(med27)	12	32657301	32663591
LOC101466946	101466946	arrestin domain-containing protein 3-like(LOC101466946)	12	14925069	14930346
cdo1	101466957	cysteine dioxygenase, type I(cdo1)	12	23384664	23389786
znf608	101467000	zinc finger protein 608(znf608)	12	28815868	28887980
rtn4r	101467044	reticulon 4 receptor(rtn4r)	12	27848317	27895798
epg5	101467051	ectopic P-granules autophagy protein 5 homolog (C. elegans)(epg5)	12	17217029	17239904
rgs7bp	101467168	regulator of G protein signaling 7 binding protein a(rgs7bpa)	12	21757762	21764413
LOC101467169	101467169	BDNF/NT-3 growth factors receptor(LOC101467169)	12	19262758	19367148
LOC101467176	101467176	noelin(LOC101467176)	12	32547105	32559344
LOC101467246	101467246	arrestin domain-containing protein 3(LOC101467246)	12	14932185	14935555
LOC101467260	101467260	oncostatin M receptor(osmr)	12	24736126	24748233
LOC101467297	101467297	C-C motif chemokine 19(LOC101467297)	12	31163490	31166628
LOC101467339	101467339	leucine rich repeat containing 8 VRAC subunit Ab(lrrc8ab)	12	27592996	27604700
LOC101467343	101467343	ubiquitin-associated protein 2(LOC101467343)	12	18674036	18692192
LOC101467439	101467439	thyroid adenoma-associated protein homolog(si:ch211-225b11.4)	12	17667332	17683780
ap3s1	101467454	adaptor related protein complex 3 subunit sigma 1(ap3s1)	12	23369206	23380151
ercc6l	101467462	excision repair cross-complementation group 6-like(ercc6l)	12	33555238	33573078
LOC101467544	101467544	arrestin domain-containing protein 3-like(LOC101467544)	12	14940221	14941707
LOC101467602	101467602	C-C motif chemokine 20(LOC101467602)	12	31155102	31156325
htr1a	101467672	5-hydroxytryptamine (serotonin) receptor 1A a(htr1aa)	12	21743816	21745783
LOC101467748	101467748	aldo-keto reductase family 1, member A1a (aldehyde reductase)(akr1a1a)	12	17199038	17202239
adam9	101467766	ADAM metallopeptidase domain 9(adam9)	12	33525229	33548653
LOC101467847	101467847	aquaporin-3(LOC101467847)	12	14958850	14965346
utp15	101467857	UTP15 small subunit processome component(utp15)	12	24683603	24690544
LOC101467908	101467908	golgin subfamily A member 6-like protein 22(LOC101467908)	12	31112464	31114125
commd10	101467976	COMM domain containing 10(commd10)	12	23301023	23368190
rnf180	101467977	ring finger protein 180a(rnf180a)	12	21748707	21755243
vcp	101468045	valosin containing protein(vcp)	12	17189308	17199027
rfk	101468047	riboflavin kinase(rfk)	12	18785800	18792057
LOC101468070	101468070	zinc finger MIZ domain-containing protein 2(LOC101468070)	12	33474849	33490922
LOC101468160	101468160	zinc finger BED domain-containing protein 1(LOC101468160)	12	14975394	14978519
LOC101468166	101468166	transcription factor BTF3(LOC101468166)	12	24680787	24683304
wdfy3	101468211	WD repeat and FYVE domain containing 3(wdfy3)	12	31013395	31134645
hscb	101468265	HscB mitochondrial iron-sulfur cluster cochaperone(hscb)	12	27604727	27611860
sema6a	101468282	sema domain, transmembrane domain (TM), and cytoplasmic domain, (semaphorin) 6A(sema6a)	12	23144188	23247882
prdm6	101468308	PR domain containing 6(prdm6)	12	28740683	28771219
fancg	101468350	FA complementation group G(fancg)	12	17179561	17189077
tctn2	101468351	tectonic family member 2(tctn2)	12	17684406	17698225
LOC101468371	101468371	centriolin(LOC101468371)	12	33414701	33439410
nol6	101468453	nucleolar protein 6 (RNA-associated)(nol6)	12	14968285	14984328
pradc1	101468461	protease associated domain containing 1(pradc1)	12	24663395	24670411
ipo11	101468462	importin 11(ipo11)	12	21556202	21683206
ppil3	101468539	peptidylprolyl isomerase (cyclophilin)-like 3(ppil3)	12	27590259	27592433
atp6v0a2	101468634	ATPase H+ transporting V0 subunit a2b(atp6v0a2b)	12	17700998	17715403
wdr54	101468758	WD repeat domain 54(wdr54)	12	14989028	14995493
hic2	101468770	hypermethylated in cancer 2(hic2)	12	24627886	24631432
prr16	101468771	proline rich 16(prr16)	12	23007048	23024958
hsd17b3	101468772	hydroxysteroid (17-beta) dehydrogenase 3(hsd17b3)	12	21535015	21551876
thoc5	101468849	THO complex 5(thoc5)	12	17162291	17170357
dnah10	101468931	dynein axonemal heavy chain 10(dnah10)	12	17715782	17746753
c5	101468953	complement component 5(c5)	12	33358710	33393566
LOC101469044	101469044	uncharacterized LOC101469044(zgc:101858)	12	27585509	27589560
tfip11	101469151	tuftelin interacting protein 11(tfip11)	12	17156018	17161631
LOC101469166	101469166	uncharacterized LOC101469166(zgc:114041)	12	26620594	26626377
lg12h2orf81	101469241	linkage group 12 C2orf81 homolog(lg12h2orf81)	12	14986058	14989084
snap29	101469255	synaptosome associated protein 29(snap29)	12	24553045	24556958
ercc6l2	101469256	excision repair cross-complementation group 6-like 2(ercc6l2)	12	21515482	21531024
LOC101469265	101469265	Kazal-type serine peptidase inhibitor domain 3(kazald3)	12	33235624	33238145
LOC101469301	101469301	CDP-diacylglycerol synthase (phosphatidate cytidylyltransferase) 1(cds1)	12	30977211	31009878
LOC101469339	101469339	collagen, type XXVII, alpha 1b(col27a1b)	12	27519093	27585305
srrd	101469439	SRR1 domain containing(srrd)	12	17153192	17155224
gldc	101469452	glycine dehydrogenase (decarboxylating)(gldc)	12	26630387	26648253
pheta1	101469454	PH domain containing endocytic trafficking adaptor 1(pheta1)	12	22999271	23004754
rhbdd3	101469526	rhomboid domain containing 3(rhbdd3)	12	17804480	17807420
serpind1	101469536	serpin peptidase inhibitor, clade D (heparin cofactor), member 1(serpind1)	12	24567182	24570006
LOC101469542	101469542	glutamate receptor, ionotropic, N-methyl D-aspartate 1b(grin1b)	12	33158747	33221083
tmem175	101469572	transmembrane protein 175(tmem175)	12	30970125	30976219
LOC101469607	101469607	mucin-5AC(LOC101469607)	12	27382820	27389965
LOC101469715	101469715	Janus kinase 2b(jak2b)	12	26592724	26619959
sh2b3	101469716	SH2B adaptor protein 3(sh2b3)	12	22921248	22990192
pi4ka	101469810	phosphatidylinositol 4-kinase, catalytic, alpha b(pi4kab)	12	24557114	24586491
LOC101469816	101469816	TSC complex subunit 1a(tsc1a)	12	33107359	33123402
rasgef1b	101469854	RasGEF domain family, member 1Ba(rasgef1ba)	12	30805414	30931036
LOC101469894	101469894	potassium sodium-activated channel subfamily T member 1b(kcnt1b)	12	27390293	27471781
LOC101469899	101469899	clustered mitochondria protein homolog(si:ch211-166a6.5)	12	17140502	17152364
ptch1	101469910	patched 1(ptch1)	12	21418388	21468777
emid1	101469986	EMI domain containing 1(emid1)	12	17748626	17803115
LOC101470080	101470080	Rho related BTB domain containing 4(rhobtb4)	12	15008519	15045551
lg12h9orf3	101470200	aminopeptidase O (putative)(aopep)	12	21278371	21370167
LOC101470290	101470290	somatomedin-B and thrombospondin type-1 domain-containing protein(si:dkey-178e17.3)	12	24538040	24550748
ddhd2	101470373	DDHD domain containing 2(ddhd2)	12	17126961	17139338
LOC101470392	101470392	FHF complex subunit HOOK interacting protein 2B(fhip2b)	12	32865510	32877629
LOC101470424	101470424	UDP-glucuronosyltransferase 2A1(LOC101470424)	12	27027041	27060995
dock8	101470488	dedicator of cytokinesis 8(dock8)	12	21222563	21277689
LOC101470522	101470522	uncharacterized LOC101470522(LOC101470522)	12	30839010	30842755
LOC101470579	101470579	transmembrane protein 132C(si:dkey-215k6.1)	12	25939537	26232670
atxn2	101470581	ataxin 2(atxn2)	12	22892265	22912918
ewsr1	101470675	EWS RNA-binding protein 1b(ewsr1b)	12	17807495	17815936
LOC101470696	101470696	fibrinogen C domain-containing protein 1(LOC101470696)	12	32769547	32785440
LOC101470788	101470788	tricarboxylate transport protein, mitochondrial(si:dkey-178e17.1)	12	24512997	24535009
bmp3	101470826	bone morphogenetic protein 3(bmp3)	12	30751610	30760421
tacc1	101470878	transforming acidic coiled-coil containing protein 1(LOC101470878)	12	17101016	17125928
aacs	101470885	acetoacetyl-CoA synthetase(aacs)	12	25848196	25889225
gas2l1	101470967	growth arrest-specific 2 like 1(gas2l1)	12	17821711	17848486
LOC101470983	101470983	G protein signaling modulator 1a(gpsm1a)	12	32717999	32723829
LOC101470998	101470998	zinc finger protein 462(LOC101470998)	12	26758012	26773275
gak	101471165	cyclin G associated kinase(gak)	12	25817007	25843897
LOC101471166	101471166	clathrin, heavy chain-like 1(cltcl1)	12	24482866	24512205
prkg2	101471197	protein kinase cGMP-dependent 2(prkg2)	12	30764474	30799708
LOC101471239	101471239	drebrin-like protein A(si:dkey-40c11.2)	12	15054308	15089157
ap1b1	101471240	adaptor related protein complex 1 subunit beta 1(ap1b1)	12	17849391	17879001
ttf1	101471259	transcription termination factor 1(ttf1)	12	32704427	32716203
LOC101471487	101471487	uncharacterized LOC101471487(LOC101471487)	12	30667828	30670979
LOC101471526	101471526	uncharacterized LOC101471526(LOC101471526)	12	15163513	15166293
LOC101471542	101471542	forkhead box D4(foxd4)	12	21198582	21199935
LOC101471546	101471546	formin-binding protein 1(LOC101471546)	12	32600879	32640450
prdm8	101471687	PR domain containing 8b(prdm8b)	12	30622775	30628868
mef2c	101471731	myocyte enhancer factor 2cb(mef2cb)	12	15233745	15302793
LOC101471834	101471834	calphotin(si:dkey-164f24.2)	12	25800669	25816284
LOC101471835	101471835	B-cell linker protein(si:dkeyp-117b11.1)	12	24467841	24478664
LOC101471836	101471836	phosphoglucomutase 5(pgm5)	12	21166966	21197620
mfsd10	101471864	major facilitator superfamily domain containing 10(mfsd10)	12	26774368	26782016
rhobtb2	101471930	Rho related BTB domain containing 2(rhobtb2)	12	13136267	13149680
antxr2	101471979	ANTXR cell adhesion molecule 2a(antxr2a)	12	30498619	30581513
plekha2	101472014	pleckstrin homology domain containing A2(plekha2)	12	17083896	17097484
mapkapk5	101472028	MAPK activated protein kinase 5(mapkapk5)	12	22869517	22884974
rasl10a	101472099	RAS-like, family 10, member A(rasl10a)	12	17881648	17903946
plat	101472111	plasminogen activator, tissue(plat)	12	24453596	24465866
LOC101472254	101472254	uncharacterized LOC101472254(LOC101472254)	12	30486897	30492095
LOC101472255	101472255	metal transporter CNNM4(LOC101472255)	12	28661524	28714019
ostf1	101472317	osteoclast stimulating factor 1(ostf1)	12	22856539	22866075
secisbp2	101472341	SECIS binding protein 2(secisbp2)	12	26784342	26792361
camsap1	101472393	calmodulin regulated spectrin-associated protein 1b(camsap1b)	12	27351139	27379097
LOC101472398	101472398	trichohyalin(si:ch211-102c2.8)	12	17969522	17978957
zswim6	101472410	zinc finger SWIM-type containing 6(LOC101472410)	12	21090900	21139396
LOC101472607	101472607	indoleamine 2,3-dioxygenase 1(ido1)	12	13150620	13154589
LOC101472624	101472624	nicotinamide riboside kinase 1(nmrk1)	12	22846111	22856099
smim15	101472708	small integral membrane protein 15(smim15)	12	21083860	21087237
bmp2k	101472748	BMP2 inducible kinase(bmp2k)	12	30251347	30306618
LOC101472801	101472801	endoplasmic reticulum aminopeptidase 1b(erap1b)	12	25774917	25785402
ikbkb	101472803	inhibitor of nuclear factor kappa B kinase subunit beta(ikbkb)	12	24409833	24445009
LOC101472831	101472831	prolactin receptor b(prlrb)	12	26795904	26807390
slc8b1	101472889	solute carrier family 8 member B1(slc8b1)	12	17023057	17031073
LOC101472948	101472948	interleukin-1 beta-like(LOC101472948)	12	28646952	28649048
LOC101472994	101472994	uncharacterized LOC101472994(LOC101472994)	12	15309086	15343900
ercc8	101473009	excision repair cross-complementation group 8(ercc8)	12	21054934	21069205
LOC101473085	101473085	stanniocalcin 1(stc1)	12	13199171	13206349
naaladl1	101473097	N-acetylated alpha-linked acidic dipeptidase like 1(naaladl1)	12	25763249	25772265
LOC101473099	101473099	voltage-dependent anion channel 3(vdac3)	12	24396145	24409033
LOC101473126	101473126	MALT paracaspase 1(malt1)	12	26816317	26830739
tmem161b	101473189	transmembrane protein 161B(tmem161b)	12	15366322	15385715
tpcn1	101473190	two pore segment channel 1(tpcn1)	12	17031186	17044392
paqr3	101473256	progestin and adipoQ receptor family member IIIa(paqr3a)	12	30308462	30324340
LOC101473277	101473277	uncharacterized LOC101473277(LOC101473277)	12	33281445	33282172
ndufaf2	101473311	NADH:ubiquinone oxidoreductase complex assembly factor 2(ndufaf2)	12	21069302	21082977
fam214b	101473396	family with sequence similarity 214 member B(fam214b)	12	25731699	25761485
LOC101473401	101473401	uncharacterized LOC101473401(LOC101473401)	12	29475057	29478276
LOC101473431	101473431	interleukin-1 beta-like(LOC101473431)	12	28638474	28640161
ubac1	101473478	UBA domain containing 1(ubac1)	12	27339489	27347035
ccnh	101473484	cyclin H(ccnh)	12	15420216	15425850
LOC101473587	101473587	NK3 homeobox 1(nkx3-1)	12	13225362	13226311
iqcd	101473662	IQ motif containing D(iqcd)	12	17044620	17049285
LOC101473768	101473768	neurogenic locus notch homolog protein 1(LOC101473768)	12	27294769	27338486
LOC101473774	101473774	oxysterol binding protein 2b(osbp2b)	12	17906919	17953816
elovl7	101473791	ELOVL fatty acid elongase 7a(elovl7a)	12	21048877	21054356
LOC101473821	101473821	histidine triad nucleotide binding protein 2(hint2)	12	26844647	26847231
LOC101473886	101473886	solute carrier family 25 member 37(slc25a37)	12	13235333	13242730
LOC101473896	101473896	gamma-glutamyl hydrolase(LOC101473896)	12	22833143	22843538
mrpl1	101473926	mitochondrial ribosomal protein L1(mrpl1)	12	30227263	30236556
LOC101473927	101473927	cytoskeleton associated protein 2-like(ckap2l)	12	28620691	28630406
rasa1	101473967	RAS p21 protein activator 1(rasa1)	12	15425930	15454693
morc2	101473968	MORC family CW-type zinc finger 2(morc2)	12	16997156	17012603
enkd1	101473982	enkurin domain containing 1(enkd1)	12	24390939	24394706
LOC101474073	101474073	gamma-crystallin M2(LOC101474073)	12	27239443	27240882
LOC101474081	101474081	deoxyguanosine kinase(dguok)	12	17989147	17992853
LOC101474178	101474178	ectonucleoside triphosphate diphosphohydrolase 4(LOC101474178)	12	13280285	13285290
rnf122	101474190	ring finger protein 122(rnf122)	12	22810384	22832591
anxa3	101474221	annexin A3a(anxa3a)	12	29891990	29904163
plbd2	101474271	phospholipase B domain containing 2(plbd2)	12	16982964	16988443
ccdc84	101474277	centrosomal AT-AC splicing factor(cenatac)	12	25724239	25729989
pde4d	101474279	phosphodiesterase 4D, cAMP-specific(pde4d)	12	20830589	21038465
mrps30	101474306	mitochondrial ribosomal protein S30(mrps30)	12	26839037	26844390
LOC101474369	101474369	transcobalamin II(tcn2)	12	17983965	17987533
LOC101474500	101474500	C-X-C motif chemokine 10(LOC101474500)	12	29860775	29862886
inpp5e	101474548	inositol polyphosphate-5-phosphatase E(inpp5e)	12	27230922	27238699
LOC101474550	101474550	cytochrome c oxidase subunit 7C, mitochondrial(LOC101474550)	12	15487224	15488924
rbm19	101474551	RNA binding motif protein 19(rbm19)	12	16973319	16982837
LOC101474555	101474555	zinc finger protein 501(LOC101474555)	12	25719507	25724044
LOC101474583	101474583	long-chain-fatty-acid--CoA ligase ACSBG2(LOC101474583)	12	26849088	26862780
ccdc117	101474639	coiled-coil domain containing 117(ccdc117)	12	17980378	17989546
LOC101474654	101474654	chondroitin sulfate N-acetylgalactosaminyltransferase 1(LOC101474654)	12	22795157	22804049
LOC101474690	101474690	GTPase IMAP family member 4(LOC101474690)	12	29776813	29790168
LOC101474701	101474701	histone H2A.V(LOC101474701)	12	28581087	28583919
cnot6l	101474769	CCR4-NOT transcription complex, subunit 6-like(cnot6l)	12	29864027	29889126
pmpca	101474814	peptidase, mitochondrial processing subunit alpha(pmpca)	12	27222914	27228913
edil3	101474821	EGF like repeats and discoidin domains 3(edil3)	12	15682166	15808924
LOC101474823	101474823	solute carrier family 2 member 11b(slc2a11b)	12	16963166	16971218
LOC101474835	101474835	zinc finger protein 502(LOC101474835)	12	25713450	25718615
polb	101474836	polymerase (DNA directed), beta(polb)	12	24385260	24390721
LOC101474940	101474940	phospholipid phosphatase 1(LOC101474940)	12	22785673	22792464
LOC101474983	101474983	transcriptional activator protein Pur-beta(LOC101474983)	12	28584199	28587728
LOC101475022	101475022	uncharacterized LOC101475022(si:ch211-214j8.12)	12	13285492	13288860
stpg2	101475031	sperm-tail PG-rich repeat containing 2(stpg2)	12	19085000	19148068
LOC101475054	101475054	uncharacterized protein At2g34460, chloroplastic(LOC101475054)	12	26867319	26872262
LOC101475062	101475062	C-X-C motif chemokine 10(LOC101475062)	12	29842747	29844786
aifm3	101475114	apoptosis inducing factor mitochondria associated 3(aifm3)	12	16929306	16947485
LOC101475126	101475126	growth arrest-specific 1a(gas1a)	12	25642180	25644665
LOC101475127	101475127	dynein, light chain, LC8-type 1(dynll1)	12	24382439	24384556
sdhaf1	101475131	succinate dehydrogenase complex assembly factor 1(sdhaf1)	12	33579774	33581650
LOC101475210	101475210	NK2 transcription factor related 7(nkx2.7)	12	13218451	13219769
LOC101475228	101475228	ATP synthase subunit alpha, mitochondrial(LOC101475228)	12	22776018	22780327
LOC101475274	101475274	heparan sulfate (glucosamine) 3-O-sulfotransferase 1-like 2(hs3st1l2)	12	28542944	28572644
LOC101475309	101475309	guanine deaminase(LOC101475309)	12	13293081	13302070
LOC101475311	101475311	hyaluronan and proteoglycan link protein 1(LOC101475311)	12	15876403	15883668
bri3bp	101475323	bri3 binding protein(bri3bp)	12	19076143	19082549
LOC101475411	101475411	prostaglandin-endoperoxide synthase 1(ptgs1)	12	27180280	27193636
tars	101475425	threonyl-tRNA synthetase 1(tars1)	12	25579444	25593883
vcan	101475507	versican(vcan)	12	15885569	15920564
LOC101475525	101475525	ring finger protein 165b(rnf165b)	12	22762247	22774902
rab3c	101475526	RAB3C, member RAS oncogene family(rab3c)	12	20816515	20828761
LOC101475576	101475576	family with sequence similarity 102 member Aa(fam102aa)	12	29797009	29828192
lg12h9orf85	101475615	linkage group 12 C9orf85 homolog(lg12h9orf85)	12	13305882	13311528
xrcc4	101475616	X-ray repair cross complementing 4(LOC101475616)	12	15939970	15964277
LOC101475617	101475617	uncharacterized LOC101475617(si:dkey-98f17.5)	12	16947279	16959640
rpl6	101475630	ribosomal protein L6(rpl6)	12	24378098	24380845
wdr31	101475632	WD repeat domain 31(wdr31)	12	19066339	19075268
LOC101475710	101475710	LIM homeobox 6b(lhx6b)	12	27154669	27163268
LOC101475717	101475717	eukaryotic translation initiation factor 4E-binding protein 2(LOC101475717)	12	18001854	18005295
tmem8b	101475726	transmembrane protein 8B(tmem8b)	12	25504484	25541372
LOC101475748	101475748	serine/threonine-protein phosphatase with EF-hands 2(LOC101475748)	12	26873144	26886202
abhd17b	101475909	abhydrolase domain containing 17B, depalmitoylase(abhd17b)	12	13311892	13325634
LOC101475910	101475910	claudin 26(cldn26)	12	16926671	16927327
acaa2	101475921	acetyl-CoA acyltransferase 2(acaa2)	12	24361605	24369186
LOC101475922	101475922	guanine nucleotide-binding protein G(q) subunit alpha(LOC101475922)	12	19039213	19063024
LOC101476008	101476008	ankyrin 1, erythrocytic a(ank1a)	12	18006356	18096494
LOC101476037	101476037	scavenger receptor class B, member 2a(scarb2a)	12	26893432	26909927
LOC101476095	101476095	arrestin domain-containing protein 3-like(LOC101476095)	12	16034674	16035866
LOC101476197	101476197	keratin, type 1, gene c5(krt1-c5)	12	27132231	27144810
lztr1	101476201	leucine-zipper-like transcription regulator 1(lztr1)	12	16915907	16925050
mccc2	101476209	methylcrotonyl-CoA carboxylase subunit 2(mccc2)	12	25481662	25499731
lg12h22orf39	101476210	linkage group 12 C22orf39 homolog(lg12h22orf39)	12	24356119	24358282
LOC101476212	101476212	uncharacterized LOC101476212(si:dkey-190g11.3)	12	20811602	20816267
nudt18	101476216	nudix (nucleoside diphosphate linked moiety X)-type motif 18(nudt18)	12	33581728	33588833
LOC101476250	101476250	solute carrier family 25 member 25a(slc25a25a)	12	29729230	29735495
tmem167a	101476298	transmembrane protein 167A(tmem167a)	12	15964289	15971772
LOC101476299	101476299	EBF transcription factor 2(ebf2)	12	18115986	18144411
cemip2	101476387	cell migration inducing hyaluronidase 2(cemip2)	12	13329197	13363478
ankdd1b	101476388	ankyrin repeat and death domain containing 1B(ankdd1b)	12	16234277	16239382
LOC101476410	101476410	guanine nucleotide-binding protein subunit alpha-14(LOC101476410)	12	19027690	19038582
gal3st1	101476500	galactose-3-O-sulfotransferase 1a(gal3st1a)	12	16902888	16913920
LOC101476508	101476508	transducin-like enhancer protein 4(LOC101476508)	12	25430637	25474363
mrpl40	101476509	mitochondrial ribosomal protein L40(mrpl40)	12	24358231	24361400
plk2	101476510	polo-like kinase 2b (Drosophila)(plk2b)	12	20805583	20810761
LOC101476537	101476537	uncharacterized LOC101476537(zgc:158260)	12	26921604	26926954
LOC101476542	101476542	probable palmitoyltransferase ZDHHC12(LOC101476542)	12	29718899	29726541
LOC101476581	101476581	arrestin domain-containing protein 3(LOC101476581)	12	16009904	16012857
LOC101476595	101476595	prostaglandin E receptor 4 (subtype EP4) a(ptger4a)	12	22696284	22698606
tal2	101476681	T-cell acute lymphocytic leukemia 2(tal2)	12	27107885	27109803
vps13a	101476700	vacuolar protein sorting 13 homolog A(vps13a)	12	18959018	19005844
LOC101476782	101476782	pescadillo(pes)	12	16880773	16901901
ufd1	101476788	ubiquitin recognition factor in ER associated degradation 1(ufd1l)	12	24351337	24355746
ccdc158	101476814	coiled-coil domain containing 158(ccdc158)	12	26927078	26940149
LOC101476822	101476822	serine/threonine-protein kinase N2(LOC101476822)	12	29693012	29714197
LOC101476865	101476865	transient receptor potential cation channel, subfamily M, member 3(trpm3)	12	13406026	13536568
LOC101476867	101476867	arrestin domain-containing protein 3(LOC101476867)	12	16013777	16023282
LOC101476956	101476956	eosinophil peroxidase(LOC101476956)	12	18148477	18154065
LOC101476957	101476957	cardiomyopathy associated 5(cmya5)	12	17503075	17514919
foxb2	101476971	forkhead box B2(foxb2)	12	18938454	18940329
LOC101476977	101476977	oxoglutarate dehydrogenase a(ogdha)	12	33496139	33524754
p2rx2	101477055	purinergic receptor P2X, ligand-gated ion channel, 2(p2rx2)	12	16869115	16874098
mrps27	101477067	mitochondrial ribosomal protein S27(mrps27)	12	22673462	22685126
LOC101477100	101477100	cyclin-G2(LOC101477100)	12	26940504	26946269
LOC101477150	101477150	arrestin domain-containing protein 3(LOC101477150)	12	16050237	16055360
mier3	101477159	mesoderm induction early response 1, family member 3 b(mier3b)	12	20744310	20752437
LOC101477240	101477240	surfactant protein Bb(sftpbb)	12	18192253	18195868
LOC101477241	101477241	thrombospondin 4a(thbs4a)	12	17478603	17492830
dhx37	101477259	DEAH (Asp-Glu-Ala-His) box polypeptide 37(dhx37)	12	24339430	24348641
LOC101477260	101477260	uncharacterized LOC101477260(LOC101477260)	12	18892212	18933876
pole	101477333	polymerase (DNA directed), epsilon(pole)	12	16852474	16867447
psat1	101477344	phosphoserine aminotransferase 1(psat1)	12	25391674	25399966
LOC101477372	101477372	sia-alpha-2,3-Gal-beta-1,4-GlcNAc-R:alpha 2,8-sialyltransferase(LOC101477372)	12	26951685	26959199
elac1	101477441	elaC ribonuclease Z 1(elac1)	12	20737830	20744268
LOC101477483	101477483	outer dense fiber protein 2(LOC101477483)	12	29672067	29684009
lg12h2orf68	101477523	linkage group 12 C2orf68 homolog(lg12h2orf68)	12	18201846	18205679
gp1bb	101477541	glycoprotein Ib platelet subunit beta(gp1bb)	12	24335792	24338607
foxn4	101477617	forkhead box N4(foxn4)	12	16815344	16821901
isca1	101477625	iron-sulfur cluster assembly 1(isca1)	12	25374366	25379749
LOC101477632	101477632	peptidylprolyl isomerase Aa (cyclophilin A)(ppiaa)	12	33467670	33472107
LOC101477650	101477650	ras-related protein Rab-27B(LOC101477650)	12	26966300	26973773
LOC101477721	101477721	zinc finger protein 366(znf366)	12	22659127	22669345
me2	101477722	malic enzyme 2, NAD(+)-dependent, mitochondrial(me2)	12	20721739	20735474
usp39	101477808	ubiquitin specific peptidase 39(usp39)	12	18195913	18201565
nefh	101477809	neurofilament heavy(nefh)	12	17172605	17177112
2022-09-05	101477824	septin 5a(sept5a)	12	24311106	24333438
LOC101477907	101477907	family with sequence similarity 219 member Ab(fam219ab)	12	13544201	13553334
ssbp2	101477908	single stranded DNA binding protein 2a(ssbp2a)	12	16070531	16130196
acacb	101477909	acetyl-CoA carboxylase beta(acacb)	12	16821924	16850470
LOC101477918	101477918	uncharacterized LOC101477918(LOC101477918)	12	25379801	25381970
LOC101477926	101477926	dickkopf-related protein 4(LOC101477926)	12	33463176	33465852
mak16	101477944	MAK16 homolog (S. cerevisiae)(mak16)	12	33908545	33913137
LOC101478044	101478044	SET nuclear proto-oncogene a(seta)	12	29686393	29691066
LOC101478089	101478089	methionine adenosyltransferase II, alpha b(mat2ab)	12	18215348	18219338
tbx5	101478090	T-box transcription factor 5b(tbx5b)	12	17066860	17079433
LOC101478101	101478101	uncharacterized LOC101478101(zgc:63587)	12	24281201	24310109
LOC101478125	101478125	uncharacterized LOC101478125(zgc:152968)	12	26982059	26995527
klf9	101478169	Kruppel-like factor 9(klf9)	12	13539759	13544076
ccno	101478181	cyclin O(ccno)	12	25358349	25362169
mapk4	101478183	mitogen-activated protein kinase 4(mapk4)	12	20701918	20720675
slc18a1	101478189	solute carrier family 18 member A1(slc18a1)	12	33444934	33456810
LOC101478210	101478210	ras-related protein Rab-14(LOC101478210)	12	33900257	33905206
LOC101478276	101478276	uncharacterized LOC101478276(LOC101478276)	12	27199981	27216793
gle1	101478318	GLE1 RNA export mediator(gle1)	12	29660300	29670779
LOC101478366	101478366	uncharacterized LOC101478366(LOC101478366)	12	16132312	16134251
kctd10	101478367	potassium channel tetramerization domain containing 10(kctd10)	12	16789986	16795149
LOC101478369	101478369	inositol polyphosphate-5-phosphatase Jb(inpp5jb)	12	18225065	18243970
LOC101478370	101478370	acyl-CoA dehydrogenase family member 11(LOC101478370)	12	17013376	17022379
mboat4	101478465	membrane bound O-acyltransferase domain containing 4(mboat4)	12	26653072	26660881
lg12h9orf84	101478549	shortage in chiasmata 1(shoc1)	12	27113453	27127545
cldn5	101478567	claudin 5a(cldn5a)	12	24277674	24279425
LOC101478568	101478568	isotocin-neurophysin IT 1(LOC101478568)	12	22655140	22657599
LOC101478638	101478638	elastase 3 like(ela3l)	12	13568854	13571635
f2r	101478639	coagulation factor II (thrombin) receptor(f2r)	12	16143984	16146892
LOC101478641	101478641	selenoprotein M(selenom)	12	18248123	18252735
LOC101478642	101478642	uncharacterized LOC101478642(zgc:158398)	12	16992167	16996353
LOC101478656	101478656	terminal uridylyl transferase 7(tut7)	12	25361015	25373839
LOC101478659	101478659	tetraspanin 36(tspan36)	12	20690174	20696401
tti2	101478663	TELO2 interacting protein 2(tti2)	12	33395604	33401855
poli	101478772	polymerase (DNA directed) iota(poli)	12	26974479	26981926
ptges2	101478781	prostaglandin E synthase 2-like(ptgesl)	12	29651690	29658942
myo1h	101478832	myosin IHa(myo1ha)	12	16795230	16805245
cdc45	101478843	CDC45 cell division cycle 45 homolog (S. cerevisiae)(cdc45)	12	24256381	24264066
LOC101478862	101478862	actin filament-associated protein 1-like 2(si:dkey-220o5.5)	12	33878894	33899735
LOC101478921	101478921	beta-carotene 15, 15-dioxygenase 2, like(bco2l)	12	13575382	13587189
LOC101478922	101478922	smoothelin b(smtnb)	12	18252884	18302250
LOC101478923	101478923	slit homolog 2 protein-like(LOC101478923)	12	16391595	16393755
prdm12	101478941	PR domain containing 12b(prdm12b)	12	33347699	33355572
mtx3	101478972	metaxin 3(mtx3)	12	17495365	17501527
LOC101478977	101478977	SWI/SNF related, matrix associated, actin dependent regulator of chromatin, subfamily a, member 2(smarca2)	12	32029112	32084135
fabp1	101479033	fatty acid binding protein 1(fabp1)	12	22654226	22655134
LOC101479036	101479036	G-protein coupled receptor 54-like(LOC101479036)	12	25383062	25389403
LOC101479105	101479105	UDP-glucuronosyltransferase 2A1(LOC101479105)	12	27086649	27103769
ube3b	101479112	ubiquitin protein ligase E3B(ube3b)	12	16773723	16789675
plpp5	101479121	phospholipid phosphatase 5(plpp5)	12	24245916	24255088
LOC101479123	101479123	protamine-like protein(LOC101479123)	12	20686364	20687213
ralgds	101479161	ral guanine nucleotide dissociation stimulator(ralgds)	12	29594640	29650491
LOC101479206	101479206	GDNF family receptor alpha-2(LOC101479206)	12	13590440	13657852
LOC101479208	101479208	southpaw(spaw)	12	17993245	17995038
fubp3	101479226	far upstream element (FUSE) binding protein 3(fubp3)	12	33314105	33341335
adamts3	101479253	ADAM metallopeptidase with thrombospondin type 1 motif, 3(adamts3)	12	31836857	31971063
LOC101479308	101479308	SET and MYND domain containing 1b(smyd1b)	12	22647519	22653008
mcidas	101479309	multiciliate differentiation and DNA synthesis associated cell cycle protein(mcidas)	12	25354488	25356900
srp19	101479337	signal recognition particle 19(srp19)	12	33833039	33836899
LOC101479386	101479386	UDP-glucuronosyltransferase 2A1(LOC101479386)	12	27064516	27084810
LOC101479392	101479392	uncharacterized LOC101479392(LOC101479392)	12	16138828	16142144
mmab	101479394	metabolism of cobalamin associated B(mmab)	12	16767656	16769734
mpeg1	101479407	macrophage expressed 1, tandem duplicate 1(mpeg1.1)	12	20677496	20680900
arl6ip4	101479504	ADP-ribosylation factor-like 6 interacting protein 4(arl6ip4)	12	18333182	18336031
gpx8	101479517	glutathione peroxidase 8 (putative)(gpx8)	12	25347289	25349806
sec14l2	101479551	SEC14 like lipid binding 2(sec14l2)	12	31405606	31432613
LOC101479592	101479592	granzyme A-like(LOC101479592)	12	25324739	25326473
ppp2cb	101479611	protein phosphatase 2 catalytic subunit beta(ppp2cb)	12	33775196	33788051
rtkn	101479678	rhotekin a(rtkna)	12	13723440	13777112
LOC101479679	101479679	coagulation factor II (thrombin) receptor-like 2(f2rl2)	12	16159474	16161238
LOC101479681	101479681	aldehyde dehydrogenase 3 family, member B2(aldh3b2)	12	16769620	16773451
LOC101479695	101479695	perforin 1.5(prf1.5)	12	20667544	20671606
LOC101479701	101479701	surfeit locus protein 4(LOC101479701)	12	33247438	33254574
LOC101479777	101479777	hydroxycarboxylic acid receptor 2-like(LOC101479777)	12	18448270	18449249
LOC101479793	101479793	cell division cycle protein 20 homolog B(LOC101479793)	12	25339249	25342537
fgf5	101479827	fibroblast growth factor 5(fgf5)	12	30651022	30664387
letm2	101479874	leucine zipper-EF-hand containing transmembrane protein 2(letm2)	12	24195496	24211347
LOC101479876	101479876	granzyme A-like(LOC101479876)	12	25298163	25300672
emb	101479894	embigin(emb)	12	26834184	26838902
iqgap2	101479965	IQ motif containing GTPase activating protein 2(iqgap2)	12	16147153	16184388
mvk	101479967	mevalonate kinase(mvk)	12	16758902	16767488
ubox5	101479977	U-box domain containing 5(ubox5)	12	22619761	22627427
smarcad1	101479978	SWI/SNF-related, matrix-associated actin-dependent regulator of chromatin, subfamily a, containing DEAD/H box 1 a(smarcad1a)	12	20651599	20667159
kntc1	101480059	kinetochore associated 1(kntc1)	12	18453057	18482822
LOC101480073	101480073	uncharacterized LOC101480073(LOC101480073)	12	25330864	25335593
LOC101480102	101480102	uncharacterized LOC101480102(zgc:101664)	12	33768323	33773891
LOC101480116	101480116	putative ankyrin repeat domain-containing protein 31(LOC101480116)	12	30236952	30247155
LOC101480174	101480174	shadow of prion protein 2(sprn2)	12	24178520	24182377
LOC101480180	101480180	cdkn1a interacting zinc finger protein 1b(ciz1b)	12	33240213	33247044
sv2c	101480261	synaptic vesicle glycoprotein 2Ca(sv2ca)	12	16188073	16217559
fam222a	101480262	family with sequence similarity 222 member Aa(fam222aa)	12	16649283	16697647
LOC101480275	101480275	arginine vasopressin(avp)	12	22614630	22616272
LOC101480350	101480350	SUN domain-containing protein 3-like(LOC101480350)	12	18521692	18522733
LOC101480358	101480358	granzyme A-like(LOC101480358)	12	25319864	25322443
fras1	101480404	Fraser extracellular matrix complex subunit 1(fras1)	12	29906486	30220076
rassf2	101480468	Ras association domain family member 2b(rassf2b)	12	24161590	24178263
LOC101480470	101480470	myosin regulatory light chain 2, atrial isoform(LOC101480470)	12	24771227	24773128
poc5	101480549	POC5 centriolar protein homolog (Chlamydomonas)(poc5)	12	16224648	16234192
trpv4	101480550	transient receptor potential cation channel, subfamily V, member 4(trpv4)	12	16628318	16641607
LOC101480598	101480598	SWI/SNF related, matrix associated, actin dependent regulator of chromatin, subfamily b, member 1a(smarcb1a)	12	29582842	29590558
LOC101480646	101480646	granzyme A-like(LOC101480646)	12	25312331	25316559
atoh1	101480648	atonal bHLH transcription factor 1a(atoh1a)	12	20619138	20620840
LOC101480654	101480654	docking protein 2(LOC101480654)	12	33132577	33149494
LOC101480698	101480698	natterin-3-like(LOC101480698)	12	29152390	29153370
LOC101480756	101480756	solute carrier family 23 member 2(slc23a2)	12	24121750	24159621
LOC101480759	101480759	rho guanine nucleotide exchange factor 28(LOC101480759)	12	24690764	24735965
gltp	101480844	glycolipid transfer protein a(gltpa)	12	16620621	16625783
dmtn	101480879	dematin actin binding protein(LOC101480879)	12	33848764	33877028
LOC101480891	101480891	derlin-3(LOC101480891)	12	29575228	29581167
LOC101480926	101480926	survival of motor neuron 1, telomeric(smn1)	12	13713242	13719674
pcsk5	101480927	proprotein convertase subtilisin/kexin type 5b(pcsk5b)	12	18697488	18784232
LOC101480941	101480941	granzyme A(LOC101480941)	12	25305448	25308472
grid2	101480943	glutamate receptor, ionotropic, delta 2(grid2)	12	20061142	20616148
ak8	101480948	adenylate kinase 8(ak8)	12	33099357	33106871
LOC101480981	101480981	natterin-3(LOC101480981)	12	29133528	29139131
LOC101481035	101481035	interleukin-12 subunit beta-like(si:dkey-88e18.2)	12	24676127	24678284
tchp	101481122	trichoplein, keratin filament binding(tchp)	12	16614902	16620662
trafd1	101481123	TRAF-type zinc finger domain containing 1(trafd1)	12	18303989	18316527
rsph14	101481157	radial spoke head 14 homolog(rsph14)	12	33840761	33843859
LOC101481175	101481175	stromelysin-3(LOC101481175)	12	29540232	29574371
hspb11	101481220	heat shock protein family B (small) member 11(hspb11)	12	13689192	13713229
polk	101481221	polymerase (DNA directed) kappa(polk)	12	16240745	16249684
LOC101481222	101481222	beta-1,3-galactosyl-O-glycosyl-glycoprotein beta-1,6-N-acetylglucosaminyltransferase-like(LOC101481222)	12	18815250	18832069
LOC101481239	101481239	amphiregulin(areg)	12	25260155	25265306
nsd3	101481339	nuclear receptor binding SET domain protein 3(nsd3)	12	24214989	24243233
LOC101481427	101481427	solute carrier family 35 member D2(slc35d2)	12	22591790	22596353
ddx31	101481432	DEAD (Asp-Glu-Ala-Asp) box polypeptide 31(ddx31)	12	33088912	33098989
LOC101481450	101481450	phosphatidylinositol 3-kinase regulatory subunit alpha(LOC101481450)	12	33746973	33767666
LOC101481466	101481466	glutathione S-transferase theta-1-like(LOC101481466)	12	29505597	29512600
col4a3bp	101481510	ceramide transporter 1(cert1)	12	16255111	16275375
LOC101481511	101481511	beta-1,3-galactosyl-O-glycosyl-glycoprotein beta-1,6-N-acetylglucosaminyltransferase-like(LOC101481511)	12	18838513	18841327
git2	101481607	G protein-coupled receptor kinase interacting ArfGAP 2a(git2a)	12	16599921	16614865
LOC101481609	101481609	methylenetetrahydrofolate dehydrogenase (NADP+ dependent) 2, methenyltetrahydrofolate cyclohydrolase(mthfd2)	12	18327493	18332654
lzts1	101481710	leucine zipper, putative tumor suppressor 1(lzts1)	12	13678646	13695342
LOC101481723	101481723	proepiregulin(LOC101481723)	12	25249378	25256287
LOC101481748	101481748	GTPase IMAP family member 8(LOC101481748)	12	33650409	33660831
LOC101481752	101481752	ly-6/neurotoxin-like protein 1(LOC101481752)	12	23752919	23754798
LOC101481760	101481760	cilia and flagella associated protein 157(cfap157)	12	29512704	29518858
LOC101481848	101481848	interleukin-1 beta(LOC101481848)	12	28631808	28633711
LOC101481896	101481896	MOB kinase activator 1A(mob1a)	12	18317401	18327442
znf367	101481908	zinc finger protein 367(znf367)	12	22586961	22591718
LOC101481910	101481910	uncharacterized LOC101481910(LOC101481910)	12	20013427	20014836
msh3	101481912	mutS homolog 3 (E. coli)(msh3)	12	23663573	23725725
LOC101482002	101482002	epithelial mitogen homolog (mouse)(epgn)	12	25246527	25247982
ccser1	101482103	coiled-coil serine-rich protein 1(ccser1)	12	19867364	20002515
LOC101482149	101482149	GTPase IMAP family member 8(LOC101482149)	12	32503429	32506682
LOC101482150	101482150	zinc-binding protein A33-like(LOC101482150)	12	28495750	28497186
mblac2	101482194	metallo-beta-lactamase domain containing 2(mblac2)	12	13777482	13780875
LOC101482196	101482196	collagen type IV alpha-3-binding protein(LOC101482196)	12	16276433	16284483
LOC101482209	101482209	Kv channel interacting protein 3b, calsenilin(kcnip3b)	12	24063435	24120124
LOC101482211	101482211	intracellular hyaluronan-binding protein 4(LOC101482211)	12	22580167	22583648
spef2	101482214	sperm flagellar 2(spef2)	12	23445346	23459320
LOC101482242	101482242	glutathione S-transferase theta-3(LOC101482242)	12	29470458	29473937
LOC101482298	101482298	methylenetetrahydrofolate dehydrogenase (NADP+ dependent) 2 like(mthfd2l)	12	25231815	25244925
LOC101482449	101482449	fructose-1,6-bisphosphatase 1(LOC101482449)	12	32340703	32345280
lysmd3	101482490	LysM, putative peptidoglycan-binding, domain containing 3(lysmd3)	12	13784893	13788230
LOC101482492	101482492	phosphatidylinositol-4-phosphate 5-kinase, type I, beta b(pip5k1bb)	12	16284703	16317303
LOC101482502	101482502	cell division cycle 14B(cdc14b)	12	22567976	22579122
dmxl1	101482504	Dmx like 1(dmxl1)	12	23061471	23124643
slc20a2	101482589	solute carrier family 20 member 2(slc20a2)	12	25172202	25220026
ankrd13a	101482664	ankyrin repeat domain 13A(ankrd13a)	12	16589988	16598845
p2rx7	101482732	purinergic receptor P2X, ligand-gated ion channel, 7(p2rx7)	12	29458161	29467735
LOC101482733	101482733	zinc-binding protein A33-like(LOC101482733)	12	28481759	28483180
polr3g	101482773	polymerase (RNA) III (DNA directed) polypeptide G(polr3g)	12	13781012	13785051
hsd17b4	101482787	hydroxysteroid (17-beta) dehydrogenase 4(hsd17b4)	12	23026182	23059577
pcna	101482883	proliferating cell nuclear antigen(pcna)	12	24040053	24043200
LOC101482888	101482888	BarH-like homeobox 1a(barhl1a)	12	33083317	33088526
LOC101482973	101482973	solute carrier family 6 member 4b(slc6a4b)	12	16578068	16584842
trim36	101482990	tripartite motif containing 36(trim36)	12	19833120	19863614
LOC101483025	101483025	probable G-protein coupled receptor 21(LOC101483025)	12	29421331	29426709
LOC101483026	101483026	tripartite motif-containing protein 35-like(LOC101483026)	12	28453858	28455342
LOC101483069	101483069	lipoxygenase homology PLAT domains 1b(loxhd1b)	12	22717057	22758703
lg12h12orf65	101483154	mitochondrial translation release factor in rescue(mtrfr)	12	18380273	18384765
LOC101483165	101483165	uncharacterized LOC101483165(zgc:152830)	12	24025829	24038038
cfap77	101483172	cilia and flagella associated protein 77(cfap77)	12	33071140	33081919
adgrv1	101483260	adhesion G protein-coupled receptor V1(adgrv1)	12	13791082	13918647
sgsm1	101483261	small G protein signaling modulator 1a(sgsm1a)	12	16537888	16574829
LOC101483298	101483298	doublesex and mab-3 related transcription factor 1(dmrt1)	12	32204616	32237656
LOC101483299	101483299	spermatid perinuclear RNA-binding protein(LOC101483299)	12	29291763	29387756
LOC101483300	101483300	nuclear factor 7, brain-like(LOC101483300)	12	28438625	28440120
lzts3	101483343	leucine zipper, putative tumor suppressor family member 3b(lzts3b)	12	22630212	22643276
LOC101483451	101483451	fumarylacetoacetate hydrolase domain containing 2A(fahd2a)	12	24016297	24025661
pggt1b	101483452	protein geranylgeranyltransferase type I, beta subunit(pggt1b)	12	19809759	19828891
arrdc3	101483541	arrestin domain containing 3a(arrdc3a)	12	13935588	13942645
LOC101483578	101483578	uncharacterized LOC101483578(LOC101483578)	12	29254944	29258560
LOC101483579	101483579	tripartite motif-containing protein 35-like(LOC101483579)	12	28434082	28435503
LOC101483632	101483632	membrane-associated phosphatidylinositol transfer protein 2(LOC101483632)	12	18338515	18380693
LOC101483644	101483644	E3 ubiquitin-protein ligase KCMF1(LOC101483644)	12	25157919	25169727
qsox2	101483653	quiescin Q6 sulfhydryl oxidase 2(qsox2)	12	33052529	33065740
LOC101483744	101483744	unc-45 myosin chaperone B(unc45b)	12	17612409	17619283
dmrt3	101483790	doublesex and mab-3 related transcription factor 3a(dmrt3a)	12	32191311	32194203
LOC101483791	101483791	UDP-glucuronosyltransferase 2A2(LOC101483791)	12	29202037	29217814
lipg	101483929	lipase, endothelial(lipg)	12	25148657	25154479
LOC101483931	101483931	glycerol-3-phosphate acyltransferase 2, mitochondrial(gpat2)	12	23834822	24014672
ccdc112	101483933	coiled-coil domain containing 112(ccdc112)	12	19803862	19809559
fancc	101483934	FA complementation group C(fancc)	12	21362124	21403517
LOC101483941	101483941	nucleus accumbens-associated protein 2(LOC101483941)	12	33027857	33044215
arsk	101484017	arylsulfatase family, member K(arsk)	12	13944095	13948397
gatc	101484106	glutamyl-tRNA amidotransferase subunit C(gatc)	12	16530725	16536753
LOC101484211	101484211	probable isoprenylcysteine alpha-carbonyl methylesterase ICME(LOC101484211)	12	25082462	25088166
LOC101484212	101484212	COBW domain containing(cbwd)	12	21201248	21219696
brd3	101484219	bromodomain containing 3(brd3)	12	33010501	33024569
dmrt2	101484254	doublesex and mab-3 related transcription factor 2a(dmrt2a)	12	32176425	32180530
LOC101484255	101484255	SH2 domain containing 3Cb(sh2d3cb)	12	29194407	29246904
ttc37	101484299	tetratricopeptide repeat domain 37(ttc37)	12	13948786	13963409
LOC101484376	101484376	kinesin-like protein KIF2A(LOC101484376)	12	17582863	17608756
LOC101484392	101484392	adrenoceptor alpha 2B(adra2b)	12	23804725	23810508
fem1c	101484393	fem-1 homolog c(fem1c)	12	19769771	19779733
npffr2	101484523	neuropeptide FF receptor 2a(npffr2a)	12	31772997	31798150
LOC101484564	101484564	uncharacterized LOC101484564(LOC101484564)	12	13963508	13965518
LOC101484566	101484566	polyubiquitin-like(LOC101484566)	12	16498363	16500655
LOC101484664	101484664	dual specificity phosphatase 2(dusp2)	12	23796482	23799371
aaed1	101484665	peroxiredoxin like 2C(prxl2c)	12	22563981	22567260
LOC101484666	101484666	transmembrane p24 trafficking protein 7(tmed7)	12	19764324	19769442
LOC101484670	101484670	inactive phospholipid phosphatase 7(LOC101484670)	12	32996672	33000224
tor2a	101484705	torsin family 2, member A(tor2a)	12	29186537	29191607
rasef	101484762	RAS and EF-hand domain containing(rasef)	12	19617384	19639041
slc4a4	101484802	solute carrier family 4 member 4a(slc4a4a)	12	31675907	31740671
LOC101484837	101484837	kinase suppressor of Ras 2(LOC101484837)	12	28358116	28415887
LOC101484842	101484842	uncharacterized LOC101484842(LOC101484842)	12	13966396	13968287
pxmp2	101484844	peroxisomal membrane protein 2(pxmp2)	12	16495770	16498306
LOC101484954	101484954	myogenesis-regulating glycosidase(LOC101484954)	12	23771468	23783632
LOC101485047	101485047	uncharacterized LOC101485047(LOC101485047)	12	19606705	19608740
ptrh1	101485084	peptidyl-tRNA hydrolase 1 homolog(ptrh1)	12	29154175	29160556
alkbh2	101485138	alkB homolog 2, alpha-ketoglutarate dependent dioxygenase(alkbh2)	12	16489416	16492335
fbxl17	101485148	F-box and leucine-rich repeat protein 17(fbxl17)	12	22328052	22561896
LOC101485150	101485150	RNA-binding protein MEX3B(LOC101485150)	12	19753163	19762622
LOC101485158	101485158	glutathione S-transferase theta 2(gstt2)	12	32980221	32985358
cenph	101485238	centromere protein H(cenph)	12	17573467	17576107
izumo1	101485257	izumo sperm-egg fusion 1(izumo1)	12	23783569	23792240
mctp1	101485330	multiple C2 domains, transmembrane 1a(mctp1a)	12	13980678	14119463
ung	101485409	uracil DNA glycosylase a(unga)	12	16491898	16494540
LOC101485410	101485410	lysine methyltransferase 5Ab(kmt5ab)	12	18390194	18394264
sdccag3	101485427	endosome associated trafficking regulator 1(entr1)	12	32969515	32973846
LOC101485557	101485557	natterin-3(LOC101485557)	12	29144431	29146977
efna5	101485613	ephrin-A5b(efna5b)	12	22159526	22267478
LOC101485614	101485614	mothers against decapentaplegic homolog 4(LOC101485614)	12	19735402	19751074
nos1	101485683	nitric oxide synthase 1 (neuronal)(nos1)	12	28299432	28341179
dimt1	101485688	DIM1 dimethyladenosine transferase 1-like (S. cerevisiae)(dimt1l)	12	17575510	17581715
rilpl2	101485689	Rab interacting lysosomal protein-like 2(rilpl2)	12	18395956	18398995
chek2	101485707	checkpoint kinase 2(chek2)	12	32974083	32980119
LOC101485802	101485802	uncharacterized LOC101485802(si:dkey-193c22.1)	12	25091725	25098128
LOC101485828	101485828	protein FAM163B(LOC101485828)	12	29077100	29120920
LOC101485851	101485851	HIRA-interacting protein 3(LOC101485851)	12	22040733	22042081
usp30	101485871	ubiquitin specific peptidase 30(usp30)	12	16480740	16488430
LOC101485884	101485884	transducin-like enhancer protein 1(LOC101485884)	12	19665822	19687327
LOC101485885	101485885	C2 calcium-dependent domain-containing protein 4C-like(LOC101485885)	12	18951723	18952952
LOC101485960	101485960	leucine rich repeat containing 74B(lrrc74b)	12	28275863	28296491
LOC101485966	101485966	uncharacterized LOC101485966(LOC101485966)	12	13994084	13995364
LOC101485967	101485967	junction-mediating and -regulatory protein(LOC101485967)	12	17552365	17567101
LOC101485988	101485988	uncharacterized LOC101485988(LOC101485988)	12	32959052	32965102
rufy3	101486036	RUN and FYVE domain containing 3(rufy3)	12	31644894	31661257
LOC101486092	101486092	chondroitin sulfate proteoglycan 4ba(cspg4ba)	12	25051911	25081241
gadd45g	101486094	growth arrest and DNA-damage-inducible, gamma a(gadd45ga)	12	21946410	21948028
LOC101486182	101486182	RILP-like protein 1(LOC101486182)	12	18400125	18409455
LOC101486193	101486193	F-box/LRR-repeat protein 2(LOC101486193)	12	19611541	19616222
LOC101486196	101486196	uncharacterized LOC101486196(si:dkey-30j10.5)	12	32953340	32954830
fam81b	101486273	family with sequence similarity 81 member B(fam81b)	12	13969048	13980545
LOC101486274	101486274	homer scaffold protein 1b(homer1b)	12	17527051	17552312
LOC101486334	101486334	natterin-3-like(LOC101486334)	12	29109022	29111300
dao	101486371	D-amino acid oxidase(dao)	12	16465607	16473479
arl15	101486382	ADP ribosylation factor like GTPase 15(arl15)	12	24911190	25013299
LOC101486383	101486383	secreted Ly-6/uPAR domain-containing protein 2(LOC101486383)	12	23738609	23739698
LOC101486384	101486384	cAMP responsive element binding protein 3-like 3 like(creb3l3l)	12	21936678	21942720
LOC101486486	101486486	dynamin 1b(dnm1b)	12	32880526	32908291
grsf1	101486519	G-rich RNA sequence binding factor 1(grsf1)	12	31637891	31643767
adamtsl2	101486622	ADAMTS-like 2(adamtsl2)	12	29036075	29070057
LOC101486672	101486672	Ras protein-specific guanine nucleotide-releasing factor 2b(rasgrf2b)	12	23614262	23660249
nim1k	101486673	NIM1 serine/threonine protein kinase a(nim1ka)	12	21924004	21936209
tent2	101486754	terminal nucleotidyltransferase 2(tent2)	12	17515916	17524828
LOC101486837	101486837	nipsnap homolog 1 (C. elegans)(nipsnap1)	12	28265624	28273786
hip1r	101486848	huntingtin interacting protein 1 related b(hip1rb)	12	18411408	18437903
mymk	101486894	myomaker, myoblast fusion factor(mymk)	12	29020751	29024888
kiaa0825	101486941	KIAA0825 ortholog(kiaa0825)	12	14149251	14275146
frmd3	101486957	FERM domain containing 3(frmd3)	12	19537611	19600953
mapk1	101486997	mitogen-activated protein kinase 1(mapk1)	12	31596768	31634888
snx18	101487053	sorting nexin 18a(snx18a)	12	25018719	25031289
castor1	101487129	cytosolic arginine sensor for mTORC1 subunit 1(castor1)	12	28240893	28263662
LOC101487146	101487146	creatine kinase U-type, mitochondrial(LOC101487146)	12	23598987	23607057
ttc16	101487180	tetratricopeptide repeat domain 16(ttc16)	12	29008122	29015869
svop	101487227	SV2 related protein a(svopa)	12	16474292	16479857
ypel1	101487282	yippee-like 1(ypel1)	12	31563226	31593373
rsrc2	101487324	arginine/serine-rich coiled-coil 2(rsrc2)	12	18483396	18491909
ndufs4	101487339	NADH:ubiquinone oxidoreductase subunit S4(ndufs4)	12	24875908	24894380
LOC101487342	101487342	gelsolin(LOC101487342)	12	32856075	32866019
LOC101487419	101487419	uncharacterized LOC101487419(LOC101487419)	12	28233421	28235961
slf1	101487427	SMC5-SMC6 complex localization factor 1(slf1)	12	14120683	14155767
LOC101487439	101487439	corticotropin-releasing factor-binding protein(LOC101487439)	12	23581907	23589239
idnk	101487441	IDNK gluconokinase(idnk)	12	19530830	19537390
LOC101487476	101487476	uncharacterized LOC101487476(LOC101487476)	12	26995761	27008684
ssh1	101487520	slingshot protein phosphatase 1a(ssh1a)	12	16444595	16465486
LOC101487614	101487614	uncharacterized LOC101487614(si:ch211-110p13.9)	12	18514049	18516898
fst	101487624	follistatin a(fsta)	12	24869162	24875195
rnft2	101487711	ring finger protein, transmembrane 2(rnft2)	12	28217791	28228656
LOC101487725	101487725	LHFPL tetraspan subfamily member 2a protein(LOC101487725)	12	23489260	23501562
serinc5	101487804	serine incorporator 5(serinc5)	12	17460731	17478607
zcchc8	101487900	zinc finger, CCHC domain containing 8(zcchc8)	12	18525007	18533631
lg12h12orf49	101487986	SREBF pathway regulator in golgi 1(spring1)	12	28228706	28233200
coro1c	101487995	coronin 1C(coro1c)	12	16401553	16441284
LOC101488005	101488005	secretory carrier-associated membrane protein 1(LOC101488005)	12	23502435	23512033
slc2a8	101488035	solute carrier family 2 member 8(slc2a8)	12	28995616	29008005
fam172a	101488077	family with sequence similarity 172 member A(fam172a)	12	14278391	14437768
ppil2	101488126	peptidylprolyl isomerase (cyclophilin)-like 2(ppil2)	12	31499268	31535957
cfap299	105940411	cilia and flagella associated protein 299(cfap299)	12	30671110	30761940
LOC105940546	105940546	GTPase IMAP family member 4(LOC105940546)	12	33627915	33642802
LOC105940566	105940566	4-hydroxybenzoate polyprenyltransferase, mitochondrial(LOC105940566)	12	26752224	26757944
LOC105940767	105940767	uncharacterized LOC105940767(LOC105940767)	12	13559332	13566352
LOC105940769	105940769	piggyBac transposable element-derived protein 4(LOC105940769)	12	15989857	15991902
LOC105940772	105940772	uncharacterized LOC105940772(LOC105940772)	12	18510715	18511144
LOC105940775	105940775	uncharacterized LOC105940775(LOC105940775)	12	18437698	18446297
LOC105940836	105940836	C5a anaphylatoxin chemotactic receptor 1-like(LOC105940836)	12	24648406	24649272
LOC105941005	105941005	tripartite motif-containing protein 35-like(LOC105941005)	12	28477915	28479300
fam240a	105941443	family with sequence similarity 240 member A(fam240a)	12	33591123	33598370
LOC106674495	106674495	immune-associated nucleotide-binding protein 10(LOC106674495)	12	33625861	33627894
LOC106674826	106674826	nuclear factor 7, brain-like(LOC106674826)	12	28469626	28471001
LOC106674829	106674829	uncharacterized LOC106674829(LOC106674829)	12	31224861	31226501
LOC106674830	106674830	cathepsin La(ctsla)	12	32357806	32361765
LOC106675478	106675478	rap guanine nucleotide exchange factor 1(LOC106675478)	12	32920494	32945467
LOC106676235	106676235	uncharacterized LOC106676235(LOC106676235)	12	33800056	33831338
LOC106676236	106676236	GTPase IMAP family member 8(LOC106676236)	12	33671195	33680514
LOC106676749	106676749	polyubiquitin(LOC106676749)	12	16528514	16529450
LOC106676750	106676750	polyubiquitin-like(LOC106676750)	12	16519614	16520573
LOC106676753	106676753	uncharacterized LOC106676753(LOC106676753)	12	14900402	14902920
LOC106676754	106676754	uncharacterized LOC106676754(LOC106676754)	12	18520572	18521418
LOC106676910	106676910	uncharacterized LOC106676910(LOC106676910)	12	22804913	22808056
LOC106677004	106677004	granzyme A-like(LOC106677004)	12	25277207	25279331
LOC106677008	106677008	WD repeat-containing protein srw1-like(LOC106677008)	12	25342809	25351245
LOC106677009	106677009	myosin regulatory light chain 2, atrial isoform(LOC106677009)	12	24775911	24778339
LOC106677014	106677014	uncharacterized LOC106677014(LOC106677014)	12	24182977	24188585
trnac-gca	111500371	transfer RNA cysteine (anticodon GCA)(trnac-gca)	12	26946927	26946998
trnar-ucg	111500372	transfer RNA arginine (anticodon UCG)(trnar-ucg)	12	25125109	25125181
trnac-gca	111500373	transfer RNA cysteine (anticodon GCA)(trnac-gca)	12	26950396	26950467
LOC111500564	111500564	uncharacterized LOC111500564(LOC111500564)	12	29393149	29446938
trnac-gca	111500566	transfer RNA cysteine (anticodon GCA)(trnac-gca)	12	29557915	29557986
trnac-gca	111500567	transfer RNA cysteine (anticodon GCA)(trnac-gca)	12	29563822	29563893
trnap-ugg	111500568	transfer RNA proline (anticodon UGG)(trnap-ugg)	12	31488063	31488134
trnac-gca	111500569	transfer RNA cysteine (anticodon GCA)(trnac-gca)	12	32247018	32247089
trnac-gca	111500571	transfer RNA cysteine (anticodon GCA)(trnac-gca)	12	30224303	30224374
trnac-gca	111500572	transfer RNA cysteine (anticodon GCA)(trnac-gca)	12	29528268	29528339
trnac-gca	111500573	transfer RNA cysteine (anticodon GCA)(trnac-gca)	12	29530478	29530549
trnac-gca	111500574	transfer RNA cysteine (anticodon GCA)(trnac-gca)	12	29557007	29557078
LOC111500912	111500912	U6 spliceosomal RNA(LOC111500912)	12	32985744	32985849
LOC111500913	111500913	small nucleolar RNA SNORD89(LOC111500913)	12	32959658	32959769
trnas-gcu	111500914	transfer RNA serine (anticodon GCU)(trnas-gcu)	12	33429217	33429298
LOC111501650	111501650	small nucleolar RNA SNORD121A(LOC111501650)	12	18684118	18684195
trnak-uuu	111501651	transfer RNA lysine (anticodon UUU)(trnak-uuu)	12	16536921	16536993
trnai-aau	111501652	transfer RNA isoleucine (anticodon AAU)(trnai-aau)	12	13965617	13965690
trnaq-cug	111501653	transfer RNA glutamine (anticodon CUG)(trnaq-cug)	12	17560338	17560409
trnaq-uug	111501654	transfer RNA glutamine (anticodon UUG)(trnaq-uug)	12	17568470	17568541
trnaf-gaa	111501655	transfer RNA phenylalanine (anticodon GAA)(trnaf-gaa)	12	13968727	13968799
trnai-aau	111501656	transfer RNA isoleucine (anticodon AAU)(trnai-aau)	12	13968324	13968397
LOC111501739	111501739	uncharacterized LOC111501739(LOC111501739)	12	21076596	21090777
LOC112429660	112429660	UDP-glucuronosyltransferase 2A2 pseudogene(LOC112429660)	12	29222350	29224554
dapk1	112429688	death-associated protein kinase 1(dapk1)	12	32373575	32434727
LOC112429710	112429710	guanine nucleotide-binding protein subunit alpha-14-like(LOC112429710)	12	19005922	19015096
LOC112429751	112429751	polyubiquitin-like(LOC112429751)	12	16524069	16525017
LOC112429767	112429767	uncharacterized LOC112429767(LOC112429767)	12	24191076	24193812
LOC112430043	112430043	fructose-1,6-bisphosphatase 2(fbp2)	12	32345921	32356958
LOC112430044	112430044	cilia- and flagella-associated protein 157-like(LOC112430044)	12	32239440	32247188
LOC112430045	112430045	granzyme A-like(LOC112430045)	12	32454685	32456070
LOC112430046	112430046	ectonucleoside triphosphate diphosphohydrolase 4(entpd4)	12	13246717	13252296
LOC112430048	112430048	C-X-C motif chemokine 10-like(LOC112430048)	12	29849940	29851959
gda	112430049	guanine deaminase(gda)	12	13261329	13268502
LOC112435625	112435625	uncharacterized LOC112435625(LOC112435625)	12	29519784	29520827
LOC112435626	112435626	uncharacterized LOC112435626(LOC112435626)	12	28659873	28660297
LOC112435627	112435627	mitoferrin-1-like(LOC112435627)	12	13268652	13275442
LOC112435629	112435629	uncharacterized LOC112435629(LOC112435629)	12	26661135	26662096
LOC112435630	112435630	uncharacterized LOC112435630(LOC112435630)	12	26696096	26698004
LOC112435631	112435631	ABC transporter F family member 4-like(LOC112435631)	12	26710064	26715816
LOC112435632	112435632	uncharacterized LOC112435632(LOC112435632)	12	26728193	26729788
LOC112435633	112435633	uncharacterized LOC112435633(LOC112435633)	12	26730196	26748476
LOC112435635	112435635	sterile alpha motif domain-containing protein 3-like(LOC112435635)	12	30188703	30196993
LOC112435641	112435641	uncharacterized LOC112435641(LOC112435641)	12	27018116	27020428
LOC112435642	112435642	uncharacterized LOC112435642(LOC112435642)	12	27014008	27016305
LOC112435643	112435643	uncharacterized LOC112435643(LOC112435643)	12	32456107	32465907
LOC112435644	112435644	uncharacterized LOC112435644(LOC112435644)	12	32494131	32497934
LOC112435646	112435646	uncharacterized LOC112435646(LOC112435646)	12	33124161	33124853
LOC112435647	112435647	uncharacterized LOC112435647(LOC112435647)	12	13253810	13255220
LOC112435648	112435648	beta-1,3-galactosyl-O-glycosyl-glycoprotein beta-1,6-N-acetylglucosaminyltransferase-like(LOC112435648)	12	18794864	18802829
rmi1	112435649	RMI1, RecQ mediated genome instability 1, homolog (S. cerevisiae)(rmi1)	12	19463931	19470329
LOC112435650	112435650	uncharacterized LOC112435650(LOC112435650)	12	26315357	26321610
LOC112435652	112435652	4-hydroxybenzoate polyprenyltransferase, mitochondrial-like(LOC112435652)	12	26662278	26665954
LOC112435653	112435653	zinc finger protein 462-like(LOC112435653)	12	26666054	26680664
LOC112435654	112435654	4-hydroxybenzoate polyprenyltransferase, mitochondrial-like(LOC112435654)	12	26686826	26694538
LOC112435655	112435655	4-hydroxybenzoate polyprenyltransferase, mitochondrial-like(LOC112435655)	12	26718548	26726320
LOC112435656	112435656	ghrelin O-acyltransferase-like(LOC112435656)	12	26748374	26751354
LOC112435657	112435657	uncharacterized LOC112435657(LOC112435657)	12	27009487	27017444
LOC112435658	112435658	piggyBac transposable element-derived protein 3-like(LOC112435658)	12	28338136	28339084
LOC112435659	112435659	reticulocyte-binding protein 2 homolog a-like(LOC112435659)	12	32250619	32260413
LOC112435660	112435660	GTPase IMAP family member 8-like(LOC112435660)	12	32260435	32263203
LOC112435661	112435661	cilia- and flagella-associated protein 157-like(LOC112435661)	12	32272298	32274095
LOC112435662	112435662	GTPase IMAP family member 4-like(LOC112435662)	12	32281134	32286440
LOC112435663	112435663	immune-associated nucleotide-binding protein 8-like(LOC112435663)	12	32444206	32453021
LOC112435664	112435664	general transcription factor II-I repeat domain-containing protein 2-like(LOC112435664)	12	32526041	32526610
LOC112435665	112435665	uncharacterized LOC112435665(LOC112435665)	12	19447131	19447974
LOC112435669	112435669	uncharacterized LOC112435669(LOC112435669)	12	32184960	32185855
LOC112435670	112435670	uncharacterized LOC112435670(LOC112435670)	12	29500404	29501819
LOC112435672	112435672	uncharacterized LOC112435672(LOC112435672)	12	19498796	19499916
LOC112435673	112435673	KN motif and ankyrin repeat domain-containing protein 1-like(LOC112435673)	12	32289955	32336001
LOC112435681	112435681	vacuolar protein sorting-associated protein 13A-like(LOC112435681)	12	19023294	19027620
LOC112435685	112435685	betaine--homocysteine S-methyltransferase 1-like(LOC112435685)	12	23475540	23477822
brd3os	112435694	BRD3 opposite strand(brd3os)	12	32989500	33009724
LOC112435696	112435696	uncharacterized LOC112435696(LOC112435696)	12	20252201	20253465
LOC112435697	112435697	gastric intrinsic factor-like(LOC112435697)	12	16345542	16348540
LOC112435698	112435698	gastric intrinsic factor-like(LOC112435698)	12	16328310	16342529
LOC112435699	112435699	uncharacterized LOC112435699(LOC112435699)	12	27919951	27920995
LOC112435703	112435703	uncharacterized LOC112435703(LOC112435703)	12	13255856	13258528
trnac-gca	112435705	transfer RNA cysteine (anticodon GCA)(trnac-gca)	12	26951312	26951383
trnac-gca	112435706	transfer RNA cysteine (anticodon GCA)(trnac-gca)	12	29555699	29555770
trnac-gca	112435707	transfer RNA cysteine (anticodon GCA)(trnac-gca)	12	29556204	29556275
trnac-gca	112435708	transfer RNA cysteine (anticodon GCA)(trnac-gca)	12	32272519	32272590
trnay-gua	112435709	transfer RNA tyrosine (anticodon GUA)(trnay-gua)	12	32275992	32276063

## Sheet: Preorbital LG7 NC_036786.1
NC_036786.1:23969724-48418700
NCBI Gene symbol	NCBI Gene ID	DAVID Gene Name	Chromosome #	START	STOP
sppl3	101463562	signal peptide peptidase 3(sppl3)	7	41761673	41798924
LOC101463564	101463564	growth arrest and DNA damage-inducible protein GADD45 gamma-like(LOC101463564)	7	31984926	31985736
chtf8	101463653	CTF8, chromosome transmission fidelity factor 8 homolog (S. cerevisiae)(chtf8)	7	26280969	26285971
LOC101463670	101463670	JunE proto-oncogene, AP-1 transcription factor subunit(june)	7	30652062	30666067
LOC101463758	101463758	tescalcin b(tescb)	7	42617443	42620738
unc13b	101463761	unc-13 homolog B(unc13b)	7	36032304	36096912
unc5c	101463762	unc-5 netrin receptor Cb(unc5cb)	7	43070117	43196637
LOC101463820	101463820	macrophage mannose receptor 1-like(LOC101463820)	7	47449451	47468492
gnaz	101463857	guanine nucleotide binding protein (G protein), alpha z polypeptide(gnaz)	7	41695477	41732217
LOC101463858	101463858	growth arrest and DNA-damage-inducible, gamma b, tandem duplicate 1(gadd45gb.1)	7	31979846	31980901
LOC101463945	101463945	interleukin 17c(il17c)	7	26322994	26329853
LOC101464017	101464017	inactive phospholipid phosphatase 7(LOC101464017)	7	45854748	45863431
LOC101464062	101464062	IL-6 subfamily cytokine M17(m17)	7	42613930	42615314
LOC101464064	101464064	family with sequence similarity 163 member B, genome duplicate a(fam163ba)	7	39394989	39415621
stoml2	101464066	stomatin (EPB72)-like 2(stoml2)	7	36025060	36030942
LOC101464069	101464069	opsin 4xa(opn4xa)	7	42956555	42967424
LOC101464123	101464123	AF4/FMR2 family, member 1(aff1)	7	47468520	47487675
lg7h9orf16	101464154	bublin coiled coil protein(bbln)	7	44400017	44402267
LOC101464156	101464156	solute carrier family 5 member 1(slc5a1)	7	41604120	41613639
thap1	101464157	THAP domain containing, apoptosis associated protein 1(thap1)	7	30708068	30713262
LOC101464158	101464158	NIM1 serine/threonine protein kinase(nim1kb)	7	31973070	31978556
zc3h18	101464239	zinc finger CCCH-type containing 18(zc3h18)	7	26333726	26394652
fam78a	101464307	family with sequence similarity 78 member Ab(fam78ab)	7	45843862	45858052
LOC101464345	101464345	TAO kinase 3b(taok3b)	7	42602591	42611763
sardh	101464347	sarcosine dehydrogenase(sardh)	7	39320718	39365298
pigo	101464349	phosphatidylinositol glycan anchor biosynthesis, class O(pigo)	7	36014593	36023806
cplane1	101464352	ciliogenesis and planar polarity effector 1(cplane1)	7	42822457	42844342
LOC101464430	101464430	cdkn1a interacting zinc finger protein 1a(ciz1a)	7	44403572	44411389
rnf208	101464432	ring finger protein 208(rnf208)	7	41591283	41599503
ccdc152	101464433	coiled-coil domain containing 152(ccdc152)	7	31964346	31971909
LOC101464518	101464518	aminopeptidase Ey(LOC101464518)	7	26415380	26436603
LOC101464631	101464631	heat shock protein beta-1-like(LOC101464631)	7	42596999	42600334
LOC101464635	101464635	glycolipid transfer protein(LOC101464635)	7	42783133	42786598
surf2	101464728	surfeit 2(surf2)	7	44396557	44399696
LOC101464778	101464778	uncharacterized LOC101464778(LOC101464778)	7	47487817	47492046
LOC101464801	101464801	aminopeptidase N(LOC101464801)	7	26445473	26481047
dbh	101464817	dopamine beta-hydroxylase (dopamine beta-monooxygenase)(dbh)	7	39367260	39384401
LOC101464819	101464819	uncharacterized LOC101464819(LOC101464819)	7	36004604	36011126
susd2	101464913	sushi domain containing 2(susd2)	7	42585107	42596556
LOC101464915	101464915	uncharacterized LOC101464915(si:dkey-106l3.7)	7	41585926	41591176
LOC101464917	101464917	growth hormone receptor(LOC101464917)	7	31930429	31964010
LOC101464919	101464919	slingshot protein phosphatase 1b(ssh1b)	7	42532895	42552864
prrc2b	101464972	proline-rich coiled-coil 2B(prrc2b)	7	45873169	45901206
LOC101465012	101465012	surfeit 4(surf4)	7	44384375	44394103
phf24	101465014	PHD finger protein 24(phf24)	7	35951506	35979216
LOC101465072	101465072	gonadal somatic cell derived factor(gsdf)	7	47492267	47495522
lg7h15orf40	101465097	linkage group 7 C15orf40 homolog(lg7h15orf40)	7	25792900	25796978
wdr91	101465212	WD repeat domain 91(wdr91)	7	30723580	30736229
LOC101465214	101465214	homeobox protein goosecoid-2(LOC101465214)	7	42470256	42471676
ass1	101465299	argininosuccinate synthase 1(ass1)	7	44341902	44371365
LOC101465300	101465300	myosin IHb(myo1hb)	7	42568712	42582811
cercam	101465301	cerebral endothelial cell adhesion molecule(cercam)	7	39303759	39316345
LOC101465382	101465382	cocaine- and amphetamine-regulated transcript protein-like(LOC101465382)	7	25777787	25780546
c6	101465400	complement component 6(c6)	7	31883264	31914986
LOC101465493	101465493	scavenger receptor class B, member 2c(scarb2c)	7	41530246	41549061
ppef2	101465539	protein phosphatase with EF-hand domain 2(ppef2)	7	47500975	47507134
urm1	101465579	ubiquitin related modifier 1(urm1)	7	39281087	39291206
rps17	101465669	ribosomal protein S17(rps17)	7	25767004	25777387
lg7h18orf54	101465685	linkage group 7 C18orf54 homolog(lg7h18orf54)	7	30739335	30751170
prkab1	101465686	protein kinase, AMP-activated, beta 1 non-catalytic subunit, a(prkab1a)	7	35933668	35944974
edf1	101465740	endothelial differentiation-related factor 1(edf1)	7	45909489	45913856
LOC101465786	101465786	synaptic vesicle 2-related protein(LOC101465786)	7	42554198	42560632
rai14	101465788	retinoic acid induced 14(rai14)	7	41448198	41527838
LOC101465789	101465789	rab11 family-interacting protein 1(LOC101465789)	7	42369024	42388015
nup54	101465842	nucleoporin 54(nup54)	7	47510276	47520567
LOC101465867	101465867	E3 ubiquitin-protein ligase TRIM21-like(LOC101465867)	7	27595885	27601823
LOC101465877	101465877	SH2 domain containing 3Ca(sh2d3ca)	7	39220349	39276202
prag1	101466033	PEAK1 related, kinase-activating pseudokinase 1(prag1)	7	45917754	45938110
LOC101466074	101466074	oxysterol binding protein 2a(osbp2a)	7	42103763	42117466
LOC101466162	101466162	ATPase H+ transporting V1 subunit B2(atp6v1b2)	7	27491477	27498837
commd9	101466163	COMM domain containing 9(commd9)	7	25755338	25761592
fbxw5	101466173	F-box and WD repeat domain containing 5(fbxw5)	7	44066132	44079655
LOC101466175	101466175	protein phosphatase 1 regulatory subunit 3C2, duplicate a(ppp1r3c2a)	7	35919247	35921230
LOC101466176	101466176	uncharacterized LOC101466176(LOC101466176)	7	31865347	31881940
LOC101466277	101466277	coronin, actin binding protein, 1Cb(coro1cb)	7	42513875	42529171
LOC101466278	101466278	fibroblast growth factor 5(LOC101466278)	7	41384217	41402063
tmem38b	101466328	transmembrane protein 38B(tmem38b)	7	45990858	46002902
LOC101466368	101466368	phosphatidylinositol 4,5-bisphosphate 5-phosphatase A(LOC101466368)	7	42071877	42082674
LOC101466461	101466461	transcription factor 7-like 1-B(LOC101466461)	7	26555457	26568375
LOC101466473	101466473	5-hydroxytryptamine receptor 1A-beta(LOC101466473)	7	31860230	31861808
LOC101466560	101466560	flocculation protein FLO11(LOC101466560)	7	42506330	42510434
LOC101466561	101466561	nicotinamide nucleotide transhydrogenase(nnt)	7	41267454	41304992
strbp	101466562	spermatid perinuclear RNA binding protein(strbp)	7	39073578	39180009
znf462	101466612	zinc finger protein 462(znf462)	7	46074170	46129689
prr5l	101466640	proline rich 5 like(prr5l)	7	25712479	25752951
coq4	101466652	coenzyme Q4 homolog (S. cerevisiae)(coq4)	7	44095433	44102391
LOC101466653	101466653	leucine-rich repeat transmembrane neuronal protein 4(LOC101466653)	7	35647015	35756438
LOC101466654	101466654	solute carrier family 20 member 1b(slc20a1b)	7	41930329	41941512
LOC101466737	101466737	caspase-3-like(LOC101466737)	7	26582671	26585043
LOC101466752	101466752	inverted formin-2(LOC101466752)	7	31843423	31846489
LOC101466838	101466838	coiled-coil domain containing 80 like 2(ccdc80l2)	7	41254316	41263883
LOC101466881	101466881	lysosome membrane protein 2(LOC101466881)	7	47525652	47555734
LOC101466920	101466920	sperm-associated antigen 16 protein(LOC101466920)	7	30736823	30739420
dusp11	101467002	dual specificity phosphatase 11 (RNA/RNP complex 1-interacting)(dusp11)	7	26590985	26601778
traf2	101467121	Tnf receptor-associated factor 2b(traf2b)	7	44083950	44095382
LOC101467123	101467123	FYN binding protein b(fybb)	7	41234710	41250964
wdr5	101467125	WD repeat domain 5(wdr5)	7	34948136	34956515
LOC101467215	101467215	methyl-CpG binding domain protein 2(mbd2)	7	30751378	30781108
LOC101467216	101467216	ring finger and CCCH-type domains 2(rc3h2)	7	38960175	38984058
LOC101467218	101467218	sodium/glucose cotransporter 1-like(LOC101467218)	7	41650426	41675229
rad23b	101467275	RAD23 homolog B, nucleotide excision repair protein(rad23b)	7	46135487	46148086
LOC101467298	101467298	G1/S-specific cyclin-D1(LOC101467298)	7	25696647	25705986
LOC101467407	101467407	chemokine-like receptor 1(LOC101467407)	7	42489668	42492685
LOC101467408	101467408	bromodomain-containing protein 3(LOC101467408)	7	34937512	34945269
LOC101467496	101467496	cytochrome c oxidase subunit 5B, mitochondrial(LOC101467496)	7	26616036	26618169
LOC101467512	101467512	sodium/glucose cotransporter 1-like(LOC101467512)	7	41615771	41637028
amacr	101467567	alpha-methylacyl-CoA racemase(amacr)	7	47592323	47624494
LOC101467603	101467603	low density lipoprotein receptor-related protein 5(lrp5)	7	25617364	25671950
LOC101467725	101467725	lysozyme C(LOC101467725)	7	30788682	30790887
klf4	101467769	Kruppel-like factor 4(klf4)	7	46150164	46154497
LOC101467799	101467799	cytochrome c oxidase subunit 5B, mitochondrial(LOC101467799)	7	26629172	26631734
bspry	101467811	B-box and SPRY domain containing(bspry)	7	44110925	44120041
LOC101467812	101467812	phosphodiesterase 6B, cGMP-specific, rod, beta(pde6b)	7	41219673	41231104
LOC101467815	101467815	iporin(LOC101467815)	7	41555740	41572637
slc45a2	101467879	solute carrier family 45 member 2(slc45a2)	7	47634003	47664693
LOC101467911	101467911	uncharacterized protein C11orf24 homolog(wu:fa25f02)	7	25553288	25566073
gfra2	101468026	GDNF family receptor alpha 2b(gfra2b)	7	27784100	27948536
LOC101468027	101468027	lysozyme C(LOC101468027)	7	30797505	30800642
LOC101468028	101468028	secreted phosphoprotein 1(spp1)	7	31737768	31744887
LOC101468074	101468074	alpha-synuclein(LOC101468074)	7	46252585	46262049
LOC101468100	101468100	neuropeptide Y receptor Y8a(npy8ar)	7	26657048	26680197
zmynd19	101468116	zinc finger, MYND-type containing 19(zmynd19)	7	44131279	44135161
LOC101468117	101468117	retinol binding protein 4, like(rbp4l)	7	41212242	41214223
LOC101468120	101468120	programmed cell death 1 ligand 2(LOC101468120)	7	41051989	41059880
xpo7	101468323	exportin 7(xpo7)	7	28113145	28136138
LOC101468325	101468325	tyrosine-protein kinase JAK2(LOC101468325)	7	38909357	38949122
sh3bp2	101468326	SH3-domain binding protein 2(sh3bp2)	7	31640362	31726822
nop14	101468378	NOP14 nucleolar protein homolog (yeast)(nop14)	7	46265663	46282794
rxfp3	101468380	relaxin family peptide receptor 3(rxfp3)	7	47672310	47673587
LOC101468410	101468410	actin related protein 1B(actr1b)	7	26733906	26740304
tmem141	101468422	transmembrane protein 141(tmem141)	7	44141172	44143988
LOC101468423	101468423	uncharacterized LOC101468423(si:ch211-243g18.2)	7	41191524	41200744
tmem170a	101468504	transmembrane protein 170A(tmem170a)	7	25513638	25518687
LOC101468516	101468516	teratocarcinoma-derived growth factor 1(tdgf1)	7	29818214	29825018
pbdc1	101468606	polysaccharide biosynthesis domain containing 1(pbdc1)	7	28138479	28142783
LOC101468669	101468669	betacellulin, epidermal growth factor family member(btc)	7	47687300	47694573
LOC101468706	101468706	E3 ubiquitin-protein ligase MARCH5(LOC101468706)	7	26740818	26745912
LOC101468707	101468707	caspase-7-like(LOC101468707)	7	26572917	26581114
sapcd2	101468723	suppressor APC domain containing 2(sapcd2)	7	44157465	44171116
ndufa8	101468724	NADH:ubiquinone oxidoreductase subunit A8(ndufa8)	7	41148851	41158715
LOC101468811	101468811	RIC8 guanine nucleotide exchange factor A(ric8a)	7	25459857	25485141
LOC101468825	101468825	relaxin 1(rln1)	7	38901264	38907314
LOC101468872	101468872	maltase-glucoamylase, intestinal-like(LOC101468872)	7	46284670	46312422
LOC101468996	101468996	drebrin-like protein A(LOC101468996)	7	26601904	26615931
rbm18	101469010	RNA binding motif protein 18(rbm18)	7	41100566	41116223
LOC101469012	101469012	patatin-like phospholipase domain containing 7a(pnpla7a)	7	39649263	39669011
LOC101469122	101469122	dematin actin binding protein(dmtn)	7	28144385	28158774
vav2	101469123	vav 2 guanine nucleotide exchange factor(vav2)	7	34729101	34927712
gng10	101469176	guanine nucleotide binding protein (G protein), gamma 10(gng10)	7	47697291	47698730
LOC101469209	101469209	PH and SEC7 domain-containing protein 1(LOC101469209)	7	44184004	44198629
LOC101469315	101469315	uncharacterized LOC101469315(LOC101469315)	7	29851912	29868070
LOC101469316	101469316	matrix metalloproteinase-17(LOC101469316)	7	38777258	38874788
rabgap1	101469317	RAB GTPase activating protein 1(rabgap1)	7	38988294	39065400
add1	101469364	adducin 1 (alpha)(add1)	7	46317753	46347330
LOC101469399	101469399	BTB/POZ domain-containing protein KCTD9(LOC101469399)	7	26746681	26753650
LOC101469412	101469412	probable flavin-containing monoamine oxidase A(si:ch211-127i16.2)	7	34643662	34701026
LOC101469486	101469486	capping protein regulator and myosin 1 linker 2(carmil2)	7	25394176	25456054
LOC101469587	101469587	syntaxin-2(LOC101469587)	7	38461645	38466585
vldlr	101469588	very low density lipoprotein receptor(vldlr)	7	31564277	31629171
LOC101469589	101469589	zinc finger and BTB domain-containing protein 26(LOC101469589)	7	38952862	38954595
nxnl2	101469638	nucleoredoxin like 2(nxnl2)	7	47699684	47702030
LOC101469677	101469677	leucine rich repeat transmembrane neuronal 4 like 1(lrrtm4l1)	7	34563800	34629442
LOC101469752	101469752	CCCTC-binding factor (zinc finger protein)(ctcf)	7	25373435	25392288
LOC101469856	101469856	uncharacterized LOC101469856(LOC101469856)	7	26764355	26767076
lhx6	101469871	LIM homeobox 6a(lhx6a)	7	41117289	41130465
csgalnact1	101469922	chondroitin sulfate N-acetylgalactosaminyltransferase 1a(csgalnact1a)	7	47702231	47741054
LOC101470033	101470033	fibroblast growth factor receptor 1-A(LOC101470033)	7	26771303	26795223
LOC101470049	101470049	phosphoglycerate mutase 2 (muscle)(pgam2)	7	38458669	38460575
tango6	101470140	transport and golgi organization 6 homolog (Drosophila)(tango6)	7	26235206	26259277
LOC101470162	101470162	nodal homolog 2-A(LOC101470162)	7	38310319	38311925
LOC101470243	101470243	potassium channel, subfamily V, member 2a(kcnv2a)	7	31554881	31560524
LOC101470341	101470341	protein phosphatase 3, catalytic subunit, gamma isozyme, b(ppp3ccb)	7	28159947	28179365
morn5	101470342	MORN repeat containing 5(morn5)	7	41105056	41148651
LOC101470343	101470343	uncharacterized LOC101470343(LOC101470343)	7	28102652	28106109
LOC101470344	101470344	neurofilament light polypeptide(LOC101470344)	7	38452444	38455321
plpp1	101470399	phospholipid phosphatase 1a(plpp1a)	7	47745990	47757868
LOC101470431	101470431	synaptic vesicle glycoprotein 2B(LOC101470431)	7	25801522	25819341
LOC101470448	101470448	putative cytochrome P450 120(LOC101470448)	7	38081094	38105361
LOC101470524	101470524	fibroblast growth factor receptor 1-A(LOC101470524)	7	26804863	26830657
LOC101470538	101470538	immunoglobulin superfamily, member 9a(igsf9a)	7	34297542	34356733
ripor1	101470622	RHO family interacting cell polarization regulator 1(ripor1)	7	25317937	25368902
LOC101470641	101470641	zinc finger protein 2 homolog(LOC101470641)	7	44179105	44183950
LOC101470644	101470644	E3 ubiquitin-protein ligase TRIM21-like(LOC101470644)	7	28442141	28444934
nefm	101470645	neurofilament medium chain a(nefma)	7	38443960	38448797
pum3	101470647	pumilio RNA-binding family member 3(pum3)	7	31541022	31553715
ppp6r3	101470727	protein phosphatase 6, regulatory subunit 3(ppp6r3)	7	25485524	25512102
inip	101470742	INTS3 and NABP interacting protein(inip)	7	37869863	37876132
mrrf	101470838	mitochondrial ribosome recycling factor(mrrf)	7	41074068	41100516
LOC101470839	101470839	transmembrane protein 230(LOC101470839)	7	34287017	34296961
dhx29	101470895	DEAH (Asp-Glu-Ala-His) box polypeptide 29(dhx29)	7	47789755	47803965
pax8	101470942	paired box 8(pax8)	7	44208692	44218604
LOC101470943	101470943	scavenger receptor cysteine-rich type 1 protein M130(LOC101470943)	7	28538349	28551118
LOC101470944	101470944	ankyrin-1(LOC101470944)	7	38320148	38398483
hpse	101471023	heparanase(hpse)	7	28182036	28191041
LOC101471115	101471115	T-box-containing protein TBX6L(LOC101471115)	7	41008449	41017984
LOC101471116	101471116	dihydropyrimidinase like 2b(dpysl2b)	7	34204613	34236489
mtrex	101471175	Mtr4 exosome RNA helicase(mtrex)	7	47773493	47789640
LOC101471362	101471362	sphingosine 1-phosphate receptor 3(LOC101471362)	7	46424991	46427780
pstpip2	101471462	proline-serine-threonine phosphatase interacting protein 2(pstpip2)	7	47804975	47816140
mrps18c	101471497	mitochondrial ribosomal protein S18C(mrps18c)	7	28207438	28208785
lmbrd2	101471498	LMBR1 domain containing 2b(lmbrd2b)	7	28711361	28730561
LOC101471499	101471499	tripartite motif-containing protein 16(LOC101471499)	7	31519039	31522059
LOC101471582	101471582	stanniocalcin(LOC101471582)	7	26831718	26834841
dnajc24	101471583	DnaJ (Hsp40) homolog, subfamily C, member 24(dnajc24)	7	25275646	25285685
LOC101471584	101471584	cytosolic carboxypeptidase 4(LOC101471584)	7	24827654	24917355
LOC101471601	101471601	BCL2 interacting protein 3 like b(bnip3lb)	7	34182958	34196804
LOC101471658	101471658	SHC (Src homology 2 domain containing) transforming protein 3(shc3)	7	46395500	46424404
helq	101471791	helicase, POLQ like(helq)	7	28191501	28207708
cfap44	101471793	cilia and flagella associated protein 44(cfap44)	7	31521942	31540592
LOC101471878	101471878	excitatory amino acid transporter 1-like(LOC101471878)	7	26839688	26851083
LOC101471879	101471879	NT-3 growth factor receptor(LOC101471879)	7	24716855	24811093
LOC101471900	101471900	protein phosphatase 2, regulatory subunit B, alpha b(ppp2r2ab)	7	34171232	34183106
LOC101471956	101471956	Golgi phosphoprotein 3(LOC101471956)	7	47823136	47828803
LOC101471988	101471988	ADP-ribosylation factor-like protein 3(LOC101471988)	7	44242393	44246009
LOC101471989	101471989	eukaryotic translation initiation factor 4E-binding protein 1(LOC101471989)	7	38315001	38318242
cfap53	101472072	cilia and flagella associated protein 53(cfap53)	7	28781016	28786286
LOC101472074	101472074	E3 ubiquitin/ISG15 ligase TRIM25-like(LOC101472074)	7	31513111	31514733
spr	101472150	sepiapterin reductase(spr)	7	26853063	26860531
LOC101472151	101472151	paired box protein Pax-6(LOC101472151)	7	25222789	25252902
pot1	101472152	protection of telomeres 1 homolog(pot1)	7	24486859	24549174
crkl	101472174	v-crk avian sarcoma virus CT10 oncogene homolog-like(crkl)	7	40996352	41005655
musk	101472176	muscle, skeletal, receptor tyrosine kinase(musk)	7	36261037	36293319
itga1	101472231	integrin, alpha 1(itga1)	7	47895420	47956002
LOC101472267	101472267	WW domain binding protein 1(wbp1)	7	44247362	44256793
LOC101472268	101472268	low-density lipoprotein receptor-related protein 2(si:dkey-88l16.3)	7	38283611	38308615
LOC101472325	101472325	Cyclin-dependent kinases regulatory subunit 2-like(zgc:86839)	7	46393007	46395489
myo5b	101472368	myosin VB(myo5b)	7	28788657	28836388
gsn	101472370	gelsolin a(gsna)	7	34146344	34167674
brcc3	101472371	BRCA1/BRCA2-containing complex, subunit 3(brcc3)	7	31461651	31462720
slc31a1	101472454	solute carrier family 31 member 1(slc31a1)	7	26877634	26888743
LOC101472455	101472455	lisH domain-containing protein C1711.05(LOC101472455)	7	25190041	25194378
LOC101472456	101472456	zona pellucida sperm-binding protein 3(LOC101472456)	7	24025986	24028773
LOC101472477	101472477	uncharacterized LOC101472477(si:ch211-222n4.2)	7	40987443	40991665
LOC101472478	101472478	phospholipid-transporting ATPase ID-like(LOC101472478)	7	36133921	36148781
kcmf1	101472538	potassium channel modulatory factor 1(kcmf1)	7	47957548	47966426
lman2l	101472573	lectin, mannose-binding 2-like a(lman2la)	7	44259512	44265871
LOC101472574	101472574	uncharacterized LOC101472574(LOC101472574)	7	38274860	38282725
gpat3	101472673	glycerol-3-phosphate acyltransferase 3(gpat3)	7	28213674	28222419
LOC101472674	101472674	uncharacterized LOC101472674(LOC101472674)	7	28876071	28887656
rab27b	101472676	RAB27B, member RAS oncogene family(rab27b)	7	31362749	31447870
LOC101472749	101472749	carbohydrate sulfotransferase 1(LOC101472749)	7	25172160	25186889
LOC101472768	101472768	unc-51 like autophagy activating kinase 1(ulk1b)	7	40939999	40965141
LOC101472769	101472769	claudin 23.1(cldn23.1)	7	38270040	38271757
LOC101472771	101472771	phospholipid-transporting ATPase ID(LOC101472771)	7	36116038	36130224
zbtb7c	101472813	zinc finger and BTB domain containing 7C(zbtb7c)	7	46459254	46477535
LOC101472815	101472815	heterogeneous nuclear ribonucleoprotein K, like(hnrpkl)	7	47988744	48008850
LOC101472857	101472857	erythrocyte band 7 integral membrane protein-like(LOC101472857)	7	34135866	34146269
abraxas1	101472962	abraxas 1, BRCA1 A complex subunit(abraxas1)	7	28209370	28213427
ugcg	101472963	UDP-glucose ceramide glucosyltransferase(ugcg)	7	28919516	28930900
mtfp1	101473059	mitochondrial fission process 1(mtfp1)	7	43664577	43673186
LOC101473061	101473061	tankyrase, TRF1-interacting ankyrin-related ADP-ribose polymerase a(tnksa)	7	38158351	38262174
barhl1	101473152	BarH-like homeobox 1b(barhl1b)	7	34088598	34100965
cfdp1	101473258	craniofacial development protein 1(cfdp1)	7	25158020	25170191
LOC101473269	101473269	leucine-rich repeat-containing protein 75B(LOC101473269)	7	42459388	42460464
nkx6-1	101473270	NK6 homeobox 1(nkx6.1)	7	28383953	28389620
LOC101473271	101473271	polypyrimidine tract-binding protein 3(LOC101473271)	7	28931285	28947768
rxra	101473356	retinoid X receptor, alpha a(rxraa)	7	34956575	35121072
tcf4	101473449	transcription factor 4(tcf4)	7	31026131	31285602
LOC101473508	101473508	guanine nucleotide-binding protein subunit alpha-14(LOC101473508)	7	48030623	48037229
LOC101473545	101473545	uncharacterized LOC101473545(zgc:158868)	7	25102159	25106836
tbx3	101473636	T-box transcription factor 3a(tbx3a)	7	43953385	43961996
gtf3c4	101473637	general transcription factor IIIC, polypeptide 4(gtf3c4)	7	34046918	34061530
LOC101473638	101473638	V-set and immunoglobulin domain containing 8a(vsig8a)	7	34703771	34728724
ctif	101473692	CBP80/20-dependent translation initiation factor(ctif)	7	46527547	46586656
LOC101473738	101473738	matrix metalloproteinase-17(LOC101473738)	7	40816293	40924240
LOC101473803	101473803	guanine nucleotide-binding protein G(q) subunit alpha(LOC101473803)	7	48009053	48025173
bcar1	101473839	BCAR1 scaffold protein, Cas family member(bcar1)	7	25107755	25155376
rpl17	101473855	ribosomal protein L17(rpl17)	7	28402769	28406972
LOC101473930	101473930	fibronectin type III and SPRY domain containing 1-like(fsd1l)	7	26908105	26913378
LOC101473938	101473938	dual specificity phosphatase 4(dusp4)	7	38136104	38146106
LOC101473939	101473939	TSC complex subunit 1b(tsc1b)	7	33975293	33999252
LOC101473942	101473942	adrenoceptor alpha 1Ab(adra1ab)	7	34260824	34266645
LOC101474044	101474044	uncharacterized LOC101474044(LOC101474044)	7	40759705	40767236
LOC101474106	101474106	prune homolog 2 with BCH domain(prune2)	7	48037723	48050448
LOC101474152	101474152	T-box transcription factor 5a(tbx5a)	7	43984746	44007180
LOC101474154	101474154	alpha-mannosidase 2(LOC101474154)	7	29136108	29153155
sfswap	101474235	splicing factor SWAP(sfswap)	7	40684654	40739082
LOC101474236	101474236	5-hydroxytryptamine receptor 4(si:dkey-247m21.3)	7	38021396	38079856
gfi1b	101474237	growth factor independent 1B transcription repressor(gfi1b)	7	33933361	33938269
LOC101474239	101474239	piggyBac transposable element-derived protein 4-like(LOC101474239)	7	33879264	33880992
mfhas1	101474334	multifunctional ROCO family signaling regulator 1(mfhas1)	7	28409346	28438286
wdr36	101474435	WD repeat domain 36(wdr36)	7	29155276	29167842
LOC101474501	101474501	anoctamin-1(LOC101474501)	7	25057376	25095077
LOC101474513	101474513	solute carrier family 26 member 1(slc26a1)	7	37987151	38005128
gtf3c5	101474514	general transcription factor IIIC, polypeptide 5(gtf3c5)	7	33909049	33918107
trabd2a	101474715	TraB domain containing 2A(trabd2a)	7	40470061	40528044
smad7	101474753	SMAD family member 7(smad7)	7	46645157	46661396
LOC101474785	101474785	scavenger receptor cysteine-rich type 1 protein M130(LOC101474785)	7	28444697	28496714
LOC101474786	101474786	bile salt-activated lipase-like(LOC101474786)	7	33904003	33907273
akna	101474788	AT-hook transcription factor(akna)	7	33576407	33595765
LOC101474884	101474884	glutathione hydrolase 1 proenzyme(LOC101474884)	7	42446646	42454185
LOC101474955	101474955	nascent polypeptide-associated complex subunit alpha, muscle-specific form(LOC101474955)	7	48119353	48165155
LOC101474985	101474985	sodium- and chloride-dependent GABA transporter 3(LOC101474985)	7	25028149	25047188
hook3	101474996	hook microtubule-tethering protein 3(hook3)	7	40425094	40450227
LOC101474998	101474998	progestin and adipoQ receptor family member 3(LOC101474998)	7	37976512	37983053
dym	101475042	dymeclin(dym)	7	46670617	46733594
rab14	101475079	RAB14, member RAS oncogene family, like(rab14l)	7	43614054	43628940
LOC101475080	101475080	bile salt-activated lipase(LOC101475080)	7	33895924	33901572
whrn	101475082	whirlin a(whrna)	7	33342420	33560869
LOC101475176	101475176	glutathione hydrolase 5 proenzyme(LOC101475176)	7	42433044	42442206
LOC101475276	101475276	kelch-like protein 25(LOC101475276)	7	25007672	25025081
LOC101475287	101475287	folylpolyglutamate synthase, mitochondrial-like(LOC101475287)	7	30345718	30352919
LOC101475359	101475359	erythrocyte membrane protein band 4.1 like 4A(epb41l4a)	7	26895585	26906482
abl1	101475377	c-abl oncogene 1, non-receptor tyrosine kinase(abl1)	7	43577848	43611821
LOC101475379	101475379	cholesterol 7-desaturase nvd(zgc:92275)	7	33856826	33872311
man1b1	101475381	mannosidase, alpha, class 1B, member 1a(man1b1a)	7	33287501	33316928
LOC101475473	101475473	calcium binding protein 1b(cabp1b)	7	42400520	42417382
brix1	101475540	brix domain containing 2(bxdc2)	7	46740643	46747650
LOC101475587	101475587	scavenger receptor cysteine-rich type 1 protein M130(LOC101475587)	7	28563716	28577588
LOC101475642	101475642	uncharacterized LOC101475642(zgc:73226)	7	48172562	48178896
exosc2	101475682	exosome component 2(exosc2)	7	43571413	43575637
LOC101475683	101475683	anthrax toxin receptor 2(LOC101475683)	7	37956935	37974185
LOC101475684	101475684	glutamate receptor, ionotropic, N-methyl D-aspartate 1a(grin1a)	7	33801497	33839218
LOC101475686	101475686	collagen alpha-1(I) chain(si:ch211-196i2.1)	7	33219669	33280985
LOC101475878	101475878	ring finger protein 170(rnf170)	7	40417829	40423531
LOC101475932	101475932	thrombospondin 4b(thbs4b)	7	48189364	48207020
ric1	101475976	RIC1 homolog, RAB6A GEF complex partner 1(ric1)	7	43525476	43570178
LOC101475977	101475977	glycerol-3-phosphate acyltransferase 4(LOC101475977)	7	42389151	42396088
LOC101475980	101475980	collagen alpha-1(V) chain(LOC101475980)	7	33164977	33214002
rad1	101476026	RAD1 homolog (S. pombe)(rad1)	7	46736037	46740538
atp6v1g1	101476050	ATPase H+ transporting V1 subunit G1(atp6v1g1)	7	26893171	26895469
LOC101476157	101476157	A-kinase anchor protein 13(LOC101476157)	7	24943669	25005031
gpn3	101476171	GPN-loop GTPase 3(gpn3)	7	40412479	40417411
LOC101476172	101476172	leukemia inhibitory factor receptor(LOC101476172)	7	30612099	30620698
LOC101476173	101476173	ras-GEF domain-containing family member 1B-B(LOC101476173)	7	37943602	37956489
LOC101476226	101476226	uncharacterized LOC101476226(zgc:122979)	7	48220947	48224727
brf2	101476269	BRF2 RNA polymerase III transcription initiation factor subunit(brf2)	7	42358854	42363149
LOC101476270	101476270	atrial natriuretic peptide receptor 2(LOC101476270)	7	32739710	32827854
lg7h18orf32	101476315	linkage group 7 C18orf32 homolog(lg7h18orf32)	7	46734367	46736029
apc	101476338	APC regulator of WNT signaling pathway(apc)	7	26914775	26945218
ermp1	101476466	endoplasmic reticulum metallopeptidase 1(ermp1)	7	43504998	43523481
arpc3	101476469	actin related protein 2/3 complex, subunit 3(arpc3)	7	40409166	40412400
LOC101476470	101476470	leukemia inhibitory factor receptor(LOC101476470)	7	30635651	30641717
LOC101476524	101476524	huluwa(hwa)	7	48224955	48228214
LOC101476561	101476561	transmembrane channel-like 2a(tmc2a)	7	32627004	32645986
sema4d	101476607	sema domain, immunoglobulin domain (Ig), transmembrane domain (TM) and short cytoplasmic domain, (semaphorin) 4D(sema4d)	7	46351225	46392784
ska1	101476636	spindle and kinetochore associated complex subunit 1(ska1)	7	24936119	24941252
LOC101476648	101476648	chondroitin sulfate proteoglycan 4(LOC101476648)	7	37894662	37918678
LOC101476752	101476752	ornithine decarboxylase antizyme 1b(oaz1b)	7	43498001	43502652
LOC101476754	101476754	prolactin-releasing peptide receptor-like(LOC101476754)	7	42340758	42351890
ppp1r3b	101476755	protein phosphatase 1, regulatory subunit 3B(ppp1r3b)	7	28695454	28702496
LOC101476756	101476756	ubiquitin-conjugating enzyme E2 G1(LOC101476756)	7	40404594	40409034
dnajc21	101476799	DnaJ heat shock protein family (Hsp40) member C21(dnajc21)	7	46753620	46766507
LOC101476800	101476800	ATP synthase F1 subunit alpha(atp5fa1)	7	48229016	48233779
uhrf2	101477026	ubiquitin like with PHD and ring finger domains 2(uhrf2)	7	43449255	43494037
anxa4	101477028	annexin A4(anxa4)	7	42296556	42306669
LOC101477029	101477029	uncharacterized LOC101477029(LOC101477029)	7	28735783	28745381
agxt2	101477079	alanine--glyoxylate aminotransferase 2(agxt2)	7	46790231	46806021
lg7h18orf25	101477080	linkage group 7 C18orf25 homolog(lg7h18orf25)	7	48234487	48247777
LOC101477122	101477122	sorting nexin-18(LOC101477122)	7	37880505	37890138
LOC101477125	101477125	complement component 7b(c7b)	7	31917200	31926712
LOC101477168	101477168	alanine--glyoxylate aminotransferase 2, mitochondrial-like(LOC101477168)	7	46770104	46788532
LOC101477207	101477207	transmembrane protein 132C(si:dkey-112m2.1)	7	40172614	40347351
LOC101477308	101477308	AP2-associated protein kinase 1(LOC101477308)	7	42276122	42296121
dcc	101477310	DCC netrin 1 receptor(dcc)	7	29470460	29713862
prlr	101477358	prolactin receptor a(prlra)	7	46817464	46839798
kiaa1958	101477399	KIAA1958 ortholog(kiaa1958)	7	37876220	37879722
kiaa2026	101477500	KIAA2026 ortholog(kiaa2026)	7	43432272	43444193
LOC101477501	101477501	transmembrane protein 132D(si:dkey-1d7.3)	7	40031676	40090110
fktn	101477578	fukutin(fktn)	7	26948297	26957805
snx30	101477671	sorting nexin family member 30(snx30)	7	37854180	37869338
LOC101477672	101477672	ectonucleoside triphosphate diphosphohydrolase 2(LOC101477672)	7	33781412	33792419
LOC101477675	101477675	endonuclease domain-containing 1 protein-like(LOC101477675)	7	31492279	31493752
LOC101477733	101477733	neurotrophic tyrosine kinase, receptor, type 2b(ntrk2b)	7	47968939	47991159
LOC101477761	101477761	WASP like actin nucleation promoting factor a(wasla)	7	24632072	24662181
LOC101477777	101477777	anthrax toxin receptor 1(LOC101477777)	7	42254687	42272571
nedd4l	101477833	NEDD4 like E3 ubiquitin protein ligase(nedd4l)	7	46844236	46886748
rnf165	101477934	ring finger protein 165a(rnf165a)	7	48252775	48266793
mlana	101477973	melan-A(mlana)	7	43428854	43431839
il7r	101477974	interleukin 7 receptor(il7r)	7	28850973	28856912
LOC101477975	101477975	RIMS binding protein 2a(rimbp2a)	7	39949727	40017496
slc46a2	101477976	solute carrier family 46 member 2(slc46a2)	7	37836942	37851904
LOC101477977	101477977	phosphohistidine phosphatase 1(phpt1)	7	33775542	33779736
LOC101477979	101477979	tripartite motif-containing protein 16-like(LOC101477979)	7	31477747	31479414
LOC101478025	101478025	proprotein convertase subtilisin/kexin type 5a(pcsk5a)	7	48050539	48107106
ufc1	101478047	ubiquitin-fold modifier conjugating enzyme 1(ufc1)	7	26958276	26959441
LOC101478199	101478199	lipoxygenase homology PLAT domains 1a(loxhd1a)	7	48270620	48306779
LOC101478247	101478247	nipped-B-like protein(LOC101478247)	7	43403050	43426215
LOC101478248	101478248	bone morphogenetic protein 1(LOC101478248)	7	42231880	42252955
capsl	101478249	calcyphosine-like b(capslb)	7	28860729	28867996
LOC101478250	101478250	A-kinase anchor protein 2(LOC101478250)	7	37736266	37834436
LOC101478251	101478251	MAM domain containing 4(mamdc4)	7	33757739	33773160
ythdc1	101478320	YTH domain containing 1(ythdc1)	7	26968560	26978817
LOC101478411	101478411	par-6 family cell polarity regulator alpha(pard6a)	7	24670670	24686992
st8sia5	101478484	ST8 alpha-N-acetyl-neuraminide alpha-2,8-sialyltransferase 5(st8sia5)	7	48308549	48326386
nup155	101478524	nucleoporin 155(nup155)	7	43386427	43400700
LOC101478526	101478526	uncharacterized LOC101478526(LOC101478526)	7	31297660	31355759
sec16a	101478581	SEC16 homolog A, endoplasmic reticulum export factor(sec16a)	7	48365854	48384057
LOC101478600	101478600	UDP-glucuronosyltransferase 2C1(LOC101478600)	7	27005643	27011744
noc4l	101478613	nucleolar complex associated 4 homolog(noc4l)	7	39938757	39946358
LOC101478695	101478695	hyaluronoglucosaminidase 6(hyal6)	7	24617652	24627415
LOC101478709	101478709	tripartite motif containing 69(trim69)	7	42227588	42231631
LOC101478711	101478711	glutamine synthetase(LOC101478711)	7	33739574	33753064
LOC101478877	101478877	UDP-glucuronosyltransferase 2A1(LOC101478877)	7	26980852	27005547
LOC101478891	101478891	uncharacterized LOC101478891(LOC101478891)	7	28888852	28903924
pus1	101478892	pseudouridine synthase 1(pus1)	7	39934440	39937720
LOC101478980	101478980	hyaluronidase-4(LOC101478980)	7	24588875	24605867
LOC101478995	101478995	rhodopsin-like(LOC101478995)	7	43384556	43385680
alpk2	101479052	alpha-kinase 2(alpk2)	7	46888749	46900346
LOC101479084	101479084	uncharacterized LOC101479084(LOC101479084)	7	30058094	30064586
rpl37	101479135	ribosomal protein L37(rpl37)	7	48330253	48334901
LOC101479162	101479162	uncharacterized LOC101479162(wu:fi75a02)	7	27014163	27038242
mocs2	101479172	molybdenum cofactor synthesis 2(mocs2)	7	28909410	28917382
atp2a2	101479173	ATPase sarcoplasmic/endoplasmic reticulum Ca2+ transporting 2b(atp2a2b)	7	39905618	39929027
arrdc1	101479174	arrestin domain containing 1b(arrdc1b)	7	33688495	33733343
LOC101479270	101479270	zinc finger DHHC-type palmitoyltransferase 8a(zdhhc8a)	7	43370652	43383139
LOC101479271	101479271	calsenilin(LOC101479271)	7	42201224	42227088
plppr1	101479272	phospholipid phosphatase related 1(plppr1)	7	37609380	37681883
grp	101479326	gastrin-releasing peptide(grp)	7	46929356	46947196
LOC101479365	101479365	major facilitator superfamily domain containing 14Ba(mfsd14ba)	7	30036919	30055732
LOC101479420	101479420	prostaglandin G/H synthase 1(LOC101479420)	7	48338976	48355437
pisd	101479456	phosphatidylserine decarboxylase(pisd)	7	27041138	27053396
LOC101479457	101479457	sperm adhesion molecule 1(spam1)	7	24583658	24586401
LOC101479563	101479563	ARVCF delta catenin family member a(arvcfa)	7	43336049	43357825
hsdl2	101479645	hydroxysteroid dehydrogenase like 2(hsdl2)	7	28952274	28962525
LOC101479647	101479647	niban apoptosis regulator 2a(niban2a)	7	33644117	33674857
LOC101479734	101479734	fer (fps/fes related) tyrosine kinase(fer)	7	27084918	27096507
LOC101479735	101479735	G protein-coupled receptor 37a(gpr37a)	7	24551990	24559614
LOC101479751	101479751	BCR activator of RhoGEF and GTPase(bcr)	7	39820022	39904685
znf532	101479804	zinc finger protein 532(znf532)	7	46916651	46939230
LOC101479923	101479923	calcium-binding protein P(LOC101479923)	7	42193405	42198392
LOC101479924	101479924	deoxyribonuclease-2-beta-like(LOC101479924)	7	28988805	28994018
LOC101479926	101479926	glutamate receptor, ionotropic, N-methyl-D-aspartate 3A(grin3a)	7	37554817	37606610
slc31a2	101479927	solute carrier family 31 member 2(slc31a2)	7	33675242	33684406
rpl28	101479991	ribosomal protein L28(rpl28)	7	48358844	48360800
LOC101480015	101480015	glutamate receptor, metabotropic 8b(grm8b)	7	24291084	24458846
LOC101480031	101480031	adenosine A2a receptor b(adora2ab)	7	39804133	39817618
prpf4	101480210	PRP4 pre-mRNA processing factor 4 homolog (yeast)(prpf4)	7	27099573	27109958
LOC101480225	101480225	bone morphogenetic protein 10-like(LOC101480225)	7	43332644	43334497
LOC101480226	101480226	protein phosphatase PTC7 homolog(LOC101480226)	7	42181277	42190512
epha5	101480227	EPH receptor A5(epha5)	7	37290942	37350198
stxbp1	101480228	syntaxin binding protein 1a(stxbp1a)	7	33598123	33641784
LOC101480230	101480230	GTPase IMAP family member 7(LOC101480230)	7	29950240	29951083
snrpd3	101480324	small nuclear ribonucleoprotein D3 polypeptide, like(snrpd3l)	7	39798415	39800926
LOC101480421	101480421	acyl-CoA-binding domain-containing protein 6(zmp:0000001301)	7	30010370	30028335
LOC101480502	101480502	acyl-coenzyme A thioesterase 4(LOC101480502)	7	24262767	24288447
rfx3	101480517	regulatory factor X, 3 (influences HLA class II expression)(rfx3)	7	43297505	43318340
LOC101480518	101480518	TBC1 domain family member 10A(LOC101480518)	7	42164776	42179524
LOC101480521	101480521	GTPase IMAP family member 7-like(LOC101480521)	7	29939630	29940530
rax	101480667	retinal homeobox gene 3(rx3)	7	46948322	46951142
LOC101480714	101480714	SMAD family member 2(smad2)	7	37238876	37257869
LOC101480715	101480715	calcium channel, voltage-dependent, N type, alpha 1B subunit, b(cacna1bb)	7	32944778	33163687
LOC101480814	101480814	apelin receptor B(LOC101480814)	7	42148444	42150494
LOC101480815	101480815	calcium/calmodulin-dependent protein kinase kinase 2(LOC101480815)	7	39776587	39796978
LOC101480818	101480818	GTPase IMAP family member 7-like(LOC101480818)	7	29931251	29932042
LOC101480866	101480866	uncharacterized LOC101480866(LOC101480866)	7	48361080	48362980
cdc26	101480892	cell division cycle 26 homolog(cdc26)	7	27097794	27099590
ssna1	101480997	Sjogren syndrome nuclear autoantigen 1(ssna1)	7	32881729	32885388
nfkbil1	101481090	nuclear factor of kappa light polypeptide gene enhancer in B-cells inhibitor-like 1(nfkbil1)	7	42135256	42137720
LOC101481185	101481185	SMAD family member 4a(smad4a)	7	43318380	43325660
LOC101481186	101481186	spindlin-1(LOC101481186)	7	29976015	29994224
cplx4	101481252	complexin 4a(cplx4a)	7	46963256	46968680
LOC101481293	101481293	euchromatic histone-lysine N-methyltransferase 1b(ehmt1b)	7	32891429	32934169
gal	101481370	galanin/GMAP prepropeptide(gal)	7	27126502	27132409
LOC101481389	101481389	ATPase H+ transporting V0 subunit a2a(atp6v0a2a)	7	42120591	42133569
LOC101481391	101481391	N-acetyllactosaminide beta-1,3-N-acetylglucosaminyltransferase 2(LOC101481391)	7	37257920	37260639
LOC101481477	101481477	GLIS family zinc finger 3(glis3)	7	43279361	43294887
LOC101481478	101481478	NMDA receptor synaptonuclear signaling and neuronal migration factor(LOC101481478)	7	39727415	39768877
lman1	101481536	lectin, mannose-binding, 1(lman1)	7	46970823	46984868
LOC101481662	101481662	kelch repeat and BTB domain-containing protein 13-like(LOC101481662)	7	24254068	24255855
slc35e4	101481684	solute carrier family 35 member E4(slc35e4)	7	42094621	42101863
LOC101481773	101481773	bone morphogenetic protein receptor, type IBb(bmpr1bb)	7	43009132	43069361
LOC101481774	101481774	chloride intracellular channel 3(clic3)	7	39643369	39647717
tprn	101481775	taperin(tprn)	7	32847945	32881042
LOC101481849	101481849	testis expressed metallothionein like protein(tesmin)	7	27141826	27168022
LOC101481950	101481950	serine/threonine-protein kinase pim-3(LOC101481950)	7	24247794	24253149
ccbe1	101482020	collagen and calcium binding EGF domains 1(ccbe1)	7	46992462	47039892
skor2	101482055	SKI family transcriptional corepressor 2(skor2)	7	37132552	37143132
tmem203	101482056	transmembrane protein 203(tmem203)	7	32841733	32845659
dnajc25	101482057	DnaJ (Hsp40) homolog, subfamily C , member 25(dnajc25)	7	29967740	29972875
LOC101482258	101482258	POU domain, class 5, transcription factor 3(pou5f3)	7	39630240	39633786
LOC101482348	101482348	immediate early response 3 interacting protein 1(ier3ip1)	7	37128400	37131007
alad	101482350	aminolevulinate dehydratase(alad)	7	32831604	32841492
LOC101482351	101482351	GTPase IMAP family member 8-like(LOC101482351)	7	29932703	29936439
ftsj1	101482450	FtsJ RNA 2'-O-methyltransferase 1(ftsj1)	7	24236539	24243984
LOC101482514	101482514	potassium/sodium hyperpolarization-activated cyclic nucleotide-gated channel 1(LOC101482514)	7	47075856	47147801
LOC101482551	101482551	smoothelin a(smtna)	7	42085804	42091665
LOC101482635	101482635	PDZ and LIM domain 5b(pdlim5b)	7	42972724	43008675
hdhd2	101482636	haloacid dehalogenase-like hydrolase domain containing 2(hdhd2)	7	37120569	37124991
LOC101482637	101482637	GTPase IMAP family member 8(LOC101482637)	7	29924209	29926238
LOC101482734	101482734	bromodomain-containing protein 1(LOC101482734)	7	24221175	24235649
LOC101482798	101482798	probable E3 ubiquitin-protein ligase HERC1(LOC101482798)	7	47182691	47227157
LOC101482841	101482841	methionine adenosyltransferase II, alpha a(mat2aa)	7	42050926	42060020
LOC101482930	101482930	calcium-dependent secretion activator 2(LOC101482930)	7	27188123	27369855
gdnf	101482940	glial cell derived neurotrophic factor a(gdnfa)	7	42889541	42896749
LOC101482941	101482941	fucosyltransferase 7 (alpha (1,3) fucosyltransferase)(fut7)	7	39634029	39639589
LOC101482942	101482942	pro-melanin-concentrating hormone, like(pmchl)	7	32707663	32708263
LOC101483033	101483033	uncharacterized LOC101483033(LOC101483033)	7	30185793	30189035
LOC101483119	101483119	prosaposin(LOC101483119)	7	42044489	42050741
katnal2	101483121	katanin p60 subunit A-like 2(katnal2)	7	37094231	37100852
wdr70	101483224	WD repeat domain 70(wdr70)	7	42845042	42887663
LOC101483225	101483225	neural proliferation, differentiation and control, 1a(npdc1a)	7	39600818	39624344
ccnb1	101483226	cyclin B1(ccnb1)	7	32666149	32670170
pip5kl1	101483312	phosphatidylinositol-4-phosphate 5-kinase-like 1(pip5kl1)	7	30233392	30286442
LOC101483386	101483386	FEZ family zinc finger 1(fezf1)	7	27381906	27387749
galt	101483404	galactose-1-phosphate uridylyltransferase(galt)	7	37047821	37084568
LOC101483508	101483508	protein FAM222A(LOC101483508)	7	42788067	42821268
LOC101483509	101483509	ER degradation-enhancing alpha-mannosidase-like protein 3(si:ch211-282j22.3)	7	39583501	39597323
LOC101483510	101483510	AN1-type zinc finger protein 5(LOC101483510)	7	32651224	32662914
brinp1	101483595	bone morphogenetic protein/retinoic acid inducible neural-specific 1(brinp1)	7	45406280	45524566
LOC101483596	101483596	myeloid-specific peroxidase(mpx)	7	42020301	42026268
aass	101483693	aminoadipate-semialdehyde synthase(aass)	7	25819900	25913718
sigmar1	101483714	sigma non-opioid intracellular receptor 1(sigmar1)	7	37084627	37090007
LOC101483792	101483792	protein FAM19A5-like(LOC101483792)	7	24110475	24154355
dpm2	101483806	dolichyl-phosphate mannosyltransferase subunit 2, regulatory(dpm2)	7	30303649	30309669
LOC101483809	101483809	annexin A1(LOC101483809)	7	32615664	32622614
myl4	101483891	cardiac myosin light chain-1(cmlc1)	7	45282392	45283250
LOC101483892	101483892	lysyl oxidase a(loxa)	7	41998481	42006477
LOC101483975	101483975	protein tyrosine phosphatase receptor type Z1a(ptprz1a)	7	25917506	26013000
cntfr	101483993	ciliary neurotrophic factor receptor(cntfr)	7	36392593	36626163
fam102a	101484077	family with sequence similarity 102 member Ab(fam102ab)	7	30311745	30336197
slc30a5	101484079	solute carrier family 30 member 5(slc30a5)	7	32600353	32614506
trim32	101484158	tripartite motif containing 32(trim32)	7	44957157	44963794
LOC101484160	101484160	G protein-coupled receptor kinase interacting ArfGAP 2b(git2b)	7	42764128	42783035
dnaaf4	101484256	dynein axonemal assembly factor 4(dnaaf4)	7	26050358	26064277
LOC101484257	101484257	ceramide kinase(LOC101484257)	7	24003511	24021271
snx24	101484349	sorting nexin 24(snx24)	7	41984185	41996914
naif1	101484350	nuclear apoptosis inducing factor 1(naif1)	7	30337607	30341953
ak3	101484351	adenylate kinase 3(ak3)	7	39555961	39563064
mamdc2	101484352	MAM domain containing 2(mamdc2)	7	32554284	32597930
tmem267	101484435	transmembrane protein 267(tmem267)	7	36376215	36383874
LOC101484493	101484493	endoglin(eng)	7	45608993	45652299
LOC101484524	101484524	homeobox protein DBX1-B-like(LOC101484524)	7	26067058	26076190
LOC101484580	101484580	endothelial cell-specific molecule 1(esm1)	7	47228337	47229754
ggcx	101484617	gamma-glutamyl carboxylase(ggcx)	7	41976605	41984072
LOC101484618	101484618	folylpolyglutamate synthase, mitochondrial(LOC101484618)	7	30355278	30368186
rcl1	101484619	RNA terminal phosphate cyclase-like 1(rcl1)	7	39563151	39573795
LOC101484620	101484620	amyloid-beta A4 precursor protein-binding family A member 1(LOC101484620)	7	32526700	32552970
cdhr5	101484706	cadherin-related family member 5b(cdhr5b)	7	23985132	23995166
LOC101484719	101484719	interleukin 11 receptor, alpha(il11ra)	7	36322190	36373204
ckap5	101484805	cytoskeleton associated protein 5(ckap5)	7	26101590	26143512
astn2	101484817	astrotactin 2(astn2)	7	44890638	45030333
arhgap24	101484862	Rho GTPase activating protein 24(arhgap24)	7	47239929	47321870
gmcl1	101484904	germ cell-less, spermatogenesis associated(gmcl1)	7	41962659	41970630
LOC101484905	101484905	annexin A3b(anxa3b)	7	39573794	39582231
tjp2	101484906	tight junction protein 2a (zona occludens 2)(tjp2a)	7	32487033	32525460
ak1	101484966	adenylate kinase 1(ak1)	7	45660088	45665869
LOC101484996	101484996	plasma membrane calcium-transporting ATPase 1(LOC101484996)	7	23945228	23977330
lg7h11orf49	101485088	linkage group 7 C11orf49 homolog(lg7h11orf49)	7	26149238	26156023
pappa	101485105	pregnancy-associated plasma protein A, pappalysin 1a(pappaa)	7	44781095	44885278
cdk9	101485106	cyclin-dependent kinase 9 (CDC2-related kinase)(cdk9)	7	30374433	30379448
LOC101485202	101485202	small G protein signaling modulator 1b(sgsm1b)	7	42745504	42759915
exd3	101485204	exonuclease 3'-5' domain containing 3(exd3)	7	39492321	39539247
LOC101485385	101485385	zinc finger protein 618(znf618)	7	44719870	44764393
fam136a	101485386	family with sequence similarity 136 member A(fam136a)	7	41959392	41961696
LOC101485387	101485387	LIM domain only 4a(lmo4a)	7	30414496	30432273
gpsm1	101485436	G protein signaling modulator 1b(gpsm1b)	7	45666541	45693724
rgs3	101485658	regulator of G protein signaling 3a(rgs3a)	7	44546833	44670135
LOC101485659	101485659	serine and arginine rich splicing factor 9(srsf9)	7	42730870	42737986
LOC101485660	101485660	prenylcysteine oxidase 1(pcyox1)	7	41950300	41959050
lrsam1	101485661	leucine rich repeat and sterile alpha motif containing 1(lrsam1)	7	30434394	30448856
cdc37l1	101485662	cell division cycle 37-like 1(cdc37l1)	7	39538620	39554149
lhx3	101485718	LIM homeobox 3(lhx3)	7	45710047	45720795
LOC101485749	101485749	mitogen-activated protein kinase 8 interacting protein 1a(mapk8ip1a)	7	26166227	26191064
ntmt1	101485931	N-terminal Xaa-Pro-Lys N-methyltransferase 1(ntmt1)	7	30456968	30460659
LOC101485932	101485932	phosphatidylinositol-4-phosphate 5-kinase, type I, beta a(pip5k1ba)	7	32455723	32476704
tmem250	101486001	transmembrane protein 250(tmem250)	7	45754823	45755870
LOC101486037	101486037	cryptochrome circadian regulator 2(cry2)	7	26197836	26217026
LOC101486051	101486051	Ras association domain family member 6(rassf6)	7	36295840	36308677
golga2	101486149	golgin A2(golga2)	7	44464640	44485048
nrarp	101486150	NOTCH regulated ankyrin repeat protein a(nrarpa)	7	39480657	39486706
nacc2	101486302	NACC family member 2(nacc2)	7	45785226	45795210
mapk10	101486303	mitogen-activated protein kinase 10(mapk10)	7	47323540	47361173
LOC101486440	101486440	heat shock protein 5(hspa5)	7	44487533	44491305
ndor1	101486441	NADPH dependent diflavin oxidoreductase 1(ndor1)	7	30449970	30456287
lcn2	101486442	lipocalin 2(lcn2)	7	39455865	39459116
LOC101486443	101486443	hepcidin-like(LOC101486443)	7	32443263	32443897
LOC101486538	101486538	proline dehydrogenase (oxidase) 1a(prodha)	7	42718487	42730168
stard7	101486539	StAR-related lipid transfer (START) domain containing 7(stard7)	7	41906469	41911873
LOC101486819	101486819	galactose-3-O-sulfotransferase 1b(gal3st1b)	7	42713893	42716139
drg1	101486820	developmentally regulated GTP binding protein 1(drg1)	7	41889301	41899984
dnm1	101486913	dynamin 1a(dnm1a)	7	44412186	44461370
LOC101486914	101486914	alpha-1-microglobulin/bikunin precursor(ambp)	7	39460118	39465183
LOC101487007	101487007	zinc finger and SCAN domain-containing protein 12(LOC101487007)	7	32405252	32412670
zmat5	101487106	zinc finger, matrin-type 5(zmat5)	7	42700011	42710652
LOC101487107	101487107	potassium calcium-activated channel subfamily N member 2(kcnn2)	7	41860058	41887130
ptpn13	101487159	protein tyrosine phosphatase non-receptor type 13(ptpn13)	7	47369202	47418855
LOC101487197	101487197	prostaglandin D2 synthase a(ptgdsa)	7	39451485	39455429
rabepk	101487199	Rab9 effector protein with kelch motifs(rabepk)	7	44498217	44503362
lpar1	101487294	lysophosphatidic acid receptor 1(lpar1)	7	36214347	36255941
LOC101487398	101487398	cytochrome b-c1 complex subunit 9(LOC101487398)	7	42710660	42711390
LOC101487399	101487399	immediate early response 5-like(ier5l)	7	30514552	30517083
LOC101487582	101487582	solute carrier family 2 member 11, like(slc2a11l)	7	41834385	41845805
stbd1	101487583	starch binding domain 1(stbd1)	7	36156062	36162286
has3	101487664	hyaluronan synthase 3(has3)	7	26269657	26274870
LOC101487685	101487685	calcium binding protein 7b(cabp7b)	7	42670702	42699634
LOC101487686	101487686	carnitine O-acetyltransferase a(crata)	7	30562601	30571967
LOC101487687	101487687	ephrin-A5b(LOC101487687)	7	32104141	32204160
nup214	101487745	nucleoporin 214(nup214)	7	45796285	45830080
med13l	101487781	mediator complex subunit 13L(med13l)	7	43690086	43778789
sdad1	101487827	SDA1 domain containing 1(sdad1)	7	47425967	47432849
LOC101487870	101487870	5'-nucleotidase, cytosolic II, like 1(nt5c2l1)	7	41813430	41828531
utp4	101487953	UTP4 small subunit processome component(utp4)	7	26285021	26299464
ptpa	101487967	protein phosphatase 2 phosphatase activator(ptpa)	7	30532145	30562501
slc27a4	101487968	solute carrier family 27 member 4(slc27a4)	7	39430989	39450453
LOC101488050	101488050	ATP-dependent RNA helicase DDX54(LOC101488050)	7	43648304	43660327
klhl8	101488101	kelch-like family member 8(klhl8)	7	47433613	47447485
LOC105940678	105940678	proteinase-activated receptor 3-like(LOC105940678)	7	44176471	44177355
LOC105940731	105940731	probable G-protein coupled receptor 21(LOC105940731)	7	39026880	39032126
LOC105940736	105940736	uncharacterized LOC105940736(LOC105940736)	7	33653597	33668041
LOC105940749	105940749	uncharacterized LOC105940749(LOC105940749)	7	29996216	30010485
LOC105940750	105940750	uncharacterized LOC105940750(LOC105940750)	7	45001806	45028664
swi5	105940755	SWI5 homologous recombination repair protein(swi5)	7	39422256	39433366
LOC105940771	105940771	uncharacterized LOC105940771(LOC105940771)	7	44063204	44066801
LOC105941020	105941020	uncharacterized LOC105941020(LOC105941020)	7	24218715	24223406
LOC105941264	105941264	sperm associated antigen 8(spag8)	7	32726506	32733990
LOC106674467	106674467	uncharacterized LOC106674467(LOC106674467)	7	46955798	46958461
LOC106674485	106674485	endoplasmic reticulum chaperone BiP(LOC106674485)	7	44495168	44498101
LOC106674534	106674534	putative nuclease HARBI1(LOC106674534)	7	32010642	32011898
LOC106674535	106674535	uncharacterized LOC106674535(LOC106674535)	7	31356591	31362472
LOC106674537	106674537	uncharacterized LOC106674537(LOC106674537)	7	31749567	31758887
LOC106674539	106674539	G2/M phase-specific E3 ubiquitin-protein ligase(LOC106674539)	7	34521717	34528290
LOC106675105	106675105	katanin p60 ATPase-containing subunit A-like 2(LOC106675105)	7	37112571	37120567
LOC106675108	106675108	uncharacterized LOC106675108(LOC106675108)	7	38629921	38631210
LOC106675176	106675176	uncharacterized LOC106675176(LOC106675176)	7	35926152	35927576
LOC106675213	106675213	heat shock protein 30-like(LOC106675213)	7	36163927	36164879
LOC106675214	106675214	heat shock protein 30(LOC106675214)	7	37262199	37263126
LOC106675223	106675223	heat shock protein 30-like(LOC106675223)	7	37264625	37265449
LOC106675236	106675236	uncharacterized LOC106675236(LOC106675236)	7	38005853	38006446
LOC106675241	106675241	plasminogen receptor (KT)-like(LOC106675241)	7	41042474	41048072
LOC106675242	106675242	uncharacterized LOC106675242(LOC106675242)	7	42454346	42458773
LOC106675263	106675263	phospholipid-transporting ATPase ID-like(LOC106675263)	7	36098727	36112908
LOC106675327	106675327	transmembrane protein 119(LOC106675327)	7	42501987	42505319
LOC106675363	106675363	NACHT, LRR and PYD domains-containing protein 12(LOC106675363)	7	28662840	28675798
LOC106675364	106675364	scavenger receptor cysteine-rich type 1 protein M130(LOC106675364)	7	28761759	28768983
LOC106675365	106675365	uncharacterized LOC106675365(LOC106675365)	7	28398415	28401633
LOC106675366	106675366	scavenger receptor cysteine-rich type 1 protein M160(LOC106675366)	7	28617314	28659761
LOC106675668	106675668	uncharacterized LOC106675668(LOC106675668)	7	36795225	36799977
LOC106676201	106676201	oncostatin-M-specific receptor subunit beta(LOC106676201)	7	30579618	30583697
LOC106676203	106676203	leukemia inhibitory factor receptor(LOC106676203)	7	30593972	30607286
LOC106676205	106676205	coiled-coil domain containing 82(ccdc82)	7	30717707	30722907
LOC106676357	106676357	zinc finger BED domain-containing protein 1-like(LOC106676357)	7	42705082	42707807
LOC106676388	106676388	uncharacterized LOC106676388(LOC106676388)	7	29412034	29413261
LOC106676934	106676934	zinc finger BED domain-containing protein 1-like(LOC106676934)	7	27430467	27433891
LOC111500374	111500374	tripartite motif-containing protein 16-like(LOC111500374)	7	31465958	31467468
LOC111500718	111500718	sodium/glucose cotransporter 1-like(LOC111500718)	7	41679833	41682805
LOC111500843	111500843	small nucleolar RNA SNORD58(LOC111500843)	7	28406383	28406452
LOC111500845	111500845	small nucleolar RNA SNORD58(LOC111500845)	7	28404777	28404844
LOC111500846	111500846	small nucleolar RNA SNORD58(LOC111500846)	7	28402920	28402987
LOC111500847	111500847	small nucleolar RNA SNORD58(LOC111500847)	7	28403669	28403735
trnad-guc	111500858	transfer RNA aspartic acid (anticodon GUC)(trnad-guc)	7	42010748	42010819
trnac-gca	111500859	transfer RNA cysteine (anticodon GCA)(trnac-gca)	7	43648742	43648813
trnak-uuu	111500860	transfer RNA lysine (anticodon UUU)(trnak-uuu)	7	44138680	44138752
LOC111501567	111501567	uncharacterized LOC111501567(LOC111501567)	7	46888405	46889642
LOC111501569	111501569	small nucleolar RNA SNORD72(LOC111501569)	7	48330918	48330998
LOC111501573	111501573	small nucleolar RNA SNORD72(LOC111501573)	7	48332893	48332972
trnae-uuc	111501574	transfer RNA glutamic acid (anticodon UUC)(trnae-uuc)	7	47761550	47761621
LOC111501743	111501743	U6 spliceosomal RNA(LOC111501743)	7	26068683	26068789
LOC111501744	111501744	small nucleolar RNA SNORA71(LOC111501744)	7	25768597	25768725
LOC111501745	111501745	small nucleolar RNA SNORA71(LOC111501745)	7	25776736	25776865
trnap-ugg	111501746	transfer RNA proline (anticodon UGG)(trnap-ugg)	7	25672503	25672574
trnah-gug	111501747	transfer RNA histidin (anticodon GUG)(trnah-gug)	7	24037659	24037730
LOC112429702	112429702	scavenger receptor cysteine-rich type 1 protein M130-like(LOC112429702)	7	29206909	29275840
LOC112430004	112430004	uncharacterized LOC112430004(LOC112430004)	7	29884318	29889353
LOC112430005	112430005	protein Shroom3-like(LOC112430005)	7	30069822	30077090
LOC112430006	112430006	G2/M phase-specific E3 ubiquitin-protein ligase-like(LOC112430006)	7	38887689	38892768
LOC112430007	112430007	uncharacterized LOC112430007(LOC112430007)	7	42319049	42319745
LOC112430010	112430010	uncharacterized LOC112430010(LOC112430010)	7	42478833	42482332
LOC112430012	112430012	uncharacterized LOC112430012(LOC112430012)	7	46959566	46960386
LOC112435067	112435067	uncharacterized LOC112435067(LOC112435067)	7	28677227	28681098
LOC112435068	112435068	endophilin-B2-like(LOC112435068)	7	30092124	30153281
LOC112435069	112435069	uncharacterized protein K02A2.6-like(LOC112435069)	7	30830903	30833935
LOC112435070	112435070	E3 ubiquitin/ISG15 ligase TRIM25-like(LOC112435070)	7	31457002	31458702
LOC112435071	112435071	general transcription factor II-I repeat domain-containing protein 2-like(LOC112435071)	7	31682935	31683992
LOC112435072	112435072	splicing factor ESS-2 homolog(LOC112435072)	7	42463762	42470028
LOC112435073	112435073	zinc finger BED domain-containing protein 1-like(LOC112435073)	7	45251014	45252920
LOC112435074	112435074	C-C chemokine receptor type 1-like(LOC112435074)	7	47852815	47854005
LOC112435075	112435075	C-C chemokine receptor type 2-like(LOC112435075)	7	47860729	47863051
LOC112435096	112435096	uncharacterized LOC112435096(LOC112435096)	7	38885839	38887675
LOC112435097	112435097	uncharacterized LOC112435097(LOC112435097)	7	40158988	40160107
LOC112435100	112435100	alpha-aminoadipic semialdehyde synthase, mitochondrial-like(LOC112435100)	7	27423220	27445199
LOC112435102	112435102	ATP-dependent RNA helicase DDX54-like(LOC112435102)	7	42915053	42916912
LOC112435103	112435103	ATP-dependent RNA helicase DDX54-like(LOC112435103)	7	42921999	42923649
LOC112435114	112435114	uncharacterized LOC112435114(LOC112435114)	7	26515605	26517347
LOC112435115	112435115	uncharacterized LOC112435115(LOC112435115)	7	36808038	36808380
LOC112435116	112435116	uncharacterized LOC112435116(LOC112435116)	7	34504417	34505895
LOC112435117	112435117	uncharacterized LOC112435117(LOC112435117)	7	41135780	41138161
LOC112435123	112435123	uncharacterized LOC112435123(LOC112435123)	7	46812466	46814412
LOC112435124	112435124	uncharacterized LOC112435124(LOC112435124)	7	32295869	32299754
LOC112435125	112435125	uncharacterized LOC112435125(LOC112435125)	7	39683402	39684060
LOC112435128	112435128	uncharacterized LOC112435128(LOC112435128)	7	33398406	33400097
LOC112435133	112435133	long-chain-fatty-acid--CoA ligase 3-like(LOC112435133)	7	27450822	27458146
LOC112435137	112435137	potassium voltage-gated channel subfamily E member 4-like(LOC112435137)	7	27463032	27464503
LOC112435151	112435151	uncharacterized LOC112435151(LOC112435151)	7	35406265	35406909
LOC112435161	112435161	general transcription factor II-I repeat domain-containing protein 2A-like(LOC112435161)	7	28477544	28481443
LOC112435163	112435163	uncharacterized LOC112435163(LOC112435163)	7	28768993	28773467
LOC112435164	112435164	uncharacterized LOC112435164(LOC112435164)	7	28969029	28979302
LOC112435168	112435168	ATP-dependent RNA helicase DDX54-like(LOC112435168)	7	44048632	44050064
LOC112435171	112435171	uncharacterized LOC112435171(LOC112435171)	7	25538371	25540560
LOC112435173	112435173	E3 ubiquitin-protein ligase RNF185(LOC112435173)	7	42483118	42487044
LOC112435174	112435174	uncharacterized LOC112435174(LOC112435174)	7	24415873	24417459
LOC112435175	112435175	uncharacterized LOC112435175(LOC112435175)	7	24419005	24420337
LOC112435176	112435176	uncharacterized LOC112435176(LOC112435176)	7	24103819	24105908
LOC112435179	112435179	hyaluronidase PH-20-like(LOC112435179)	7	24572213	24579040
LOC112435180	112435180	uncharacterized LOC112435180(LOC112435180)	7	36776228	36779192
LOC112435193	112435193	NACHT, LRR and PYD domains-containing protein 12-like(LOC112435193)	7	26508116	26510009
LOC112435196	112435196	uncharacterized LOC112435196(LOC112435196)	7	38125876	38126543
LOC112435203	112435203	plasminogen receptor (KT)-like(LOC112435203)	7	41024963	41030314
LOC112435204	112435204	uncharacterized LOC112435204(LOC112435204)	7	41023582	41024969
LOC112435205	112435205	uncharacterized LOC112435205(LOC112435205)	7	34528677	34529944
LOC112435206	112435206	uncharacterized LOC112435206(LOC112435206)	7	38632666	38633514
LOC112435207	112435207	uncharacterized LOC112435207(LOC112435207)	7	38631337	38632499

## Sheet: Preorbital LG17 NW_020192791.1
NW_020192791.1:1809-NW_020192420.1_355233
NCBI Gene symbol	NCBI Gene ID	DAVID Gene Name	Chromosome #	START	STOP
LOC101465416	101465416	Maylandia zebra ephrin type-B receptor 1-B(LOC101465416)	17	15648312	15813848
LOC101466093	101466093	Maylandia zebra glypican-1(LOC101466093)	17	15560213	15618029
LOC101466772	101466772	Maylandia zebra glypican 5c(gpc5c)	17	15442722	15547966

## Sheet: Eye Area LG15 NC_036794.1
NC_036794.1:2998111-7845685
NCBI Gene symbol	NCBI Gene ID	DAVID Gene Name	Chromosome #	START	STOP
pak5	101463583	p21 protein (Cdc42/Rac)-activated kinase 5(pak5)	15	3938349	4018724
tmem200a	101463684	transmembrane protein 200A(tmem200a)	15	5596278	5614081
map7	101463782	microtubule-associated protein 7b(map7b)	15	7557807	7577859
tmem244	101463979	transmembrane protein 244(tmem244)	15	5622901	5630677
ppp1r14c	101464086	protein phosphatase 1, regulatory (inhibitor) subunit 14C(ppp1r14c)	15	7517613	7543662
fkbp6	101464270	FKBP prolyl isomerase 6(fkbp6)	15	5630986	5636248
iyd	101464367	iodotyrosine deiodinase(iyd)	15	7508699	7511820
sec63	101464652	SEC63 homolog, protein translocation regulator(sec63)	15	7492759	7505960
plcb4	101464832	phospholipase C beta 4(plcb4)	15	3850943	3924838
LOC101464936	101464936	Scm polycomb group protein like 4(scml4)	15	7471589	7489834
arhgap18	101464938	Rho GTPase activating protein 18(arhgap18)	15	5638587	5658610
lamp5	101465515	lysosomal associated membrane protein family member 5(lamp5)	15	3929313	3934913
sel1l	101465601	SEL1L adaptor subunit of ERAD E3 ubiquitin ligase(sel1l)	15	5661227	5671669
plcb1	101465812	phospholipase C beta 1(plcb1)	15	3718042	3847100
fam84a	101466001	LRAT domain containing 1(lratd1)	15	7336955	7339495
chga	101466091	chromogranin A(chga)	15	5683583	5690855
ddx1	101466291	DEAD (Asp-Glu-Ala-Asp) box helicase 1(ddx1)	15	7100914	7108228
ctgf	101466391	cellular communication network factor 2a(ccn2a)	15	5692221	5694980
bmp2	101466492	bone morphogenetic protein 2b(bmp2b)	15	3676864	3682609
nbas	101466572	NBAS subunit of NRZ tethering complex(nbas)	15	7108345	7284671
LOC101466674	101466674	syntaxin 7-like(stx7l)	15	5727795	5734406
fermt1	101466769	FERM domain containing kindlin 1(fermt1)	15	3641087	3653404
LOC101467039	101467039	uncharacterized LOC101467039(LOC101467039)	15	7087391	7098812
LOC101467041	101467041	usherin-like(si:ch211-57i17.5)	15	6938581	6941929
LOC101467145	101467145	D4, zinc and double PHD fingers, family 3(dpf3)	15	5740477	5773196
trmt6	101467234	tRNA methyltransferase 6 non-catalytic subunit(trmt6)	15	3630610	3638941
itsn2	101467530	intersectin 2a(itsn2a)	15	7036652	7085682
lg15h6orf58	101467648	linkage group 15 C6orf58 homolog(lg15h6orf58)	15	5737526	5740383
gprc6a	101467649	G protein-coupled receptor, class C, group 6, member A(gprc6a)	15	6661363	6676353
chgb	101467739	chromogranin B(chgb)	15	3626297	3630559
fam228b	101467830	family with sequence similarity 228 member A(fam228a)	15	7029759	7036599
dcaf4	101467952	WD repeat domain 21(wdr21)	15	5773766	5779973
LOC101468039	101468039	solute carrier family 23 member 1(LOC101468039)	15	3602196	3612907
LOC101468144	101468144	dihydroxyacetone phosphate acyltransferase(LOC101468144)	15	7019371	7027657
LOC101468258	101468258	zinc finger, FYVE domain containing 1(zfyve1)	15	5780010	5786116
gpcpd1	101468338	glycerophosphocholine phosphodiesterase 1(gpcpd1)	15	3582152	3599421
lpin1	101468750	lipin 1b(lpin1b)	15	7003487	7018241
gpatch2	101469230	G patch domain containing 2(gpatch2)	15	6981144	6993594
pigh	101469334	phosphatidylinositol glycan anchor biosynthesis, class H(pigh)	15	5786572	5789853
gzf1	101469429	GDNF-inducible zinc finger protein 1(gzf1)	15	3562691	3569068
LOC101469694	101469694	estrogen-related receptor gamma(LOC101469694)	15	6946744	6980317
rnf217	101469695	ring finger protein 217(rnf217)	15	6239583	6255947
LOC101469787	101469787	ras homolog family member V(rhov)	15	5809757	5812569
ptk2b	101469888	protein tyrosine kinase 2 beta, b(ptk2bb)	15	7844231	7867962
vps18	101470063	VPS18 core subunit of CORVET and HOPS complexes(vps18)	15	5812703	5819193
LOC101470064	101470064	N-ethylmaleimide-sensitive factor attachment protein, beta b(napbb)	15	3569388	3578704
LOC101470269	101470269	phospholipase B1, membrane-associated-like(si:dkey-177p2.18)	15	5674092	5678972
LOC101470358	101470358	fasciculation and elongation protein zeta 2b(fez2b)	15	6923643	6936184
ino80	101470360	INO80 complex ATPase subunit(ino80)	15	5819796	5858363
trib2	101470361	tribbles pseudokinase 2(trib2)	15	3515300	3522733
atad2b	101470559	ATPase family AAA domain containing 2B(atad2b)	15	3160073	3230722
klhl29	101470660	kelch like family member 29(klhl29)	15	3231117	3512223
chac1	101470863	ChaC, cation transport regulator homolog 1 (E. coli)(chac1)	15	5860872	5862562
LOC101470865	101470865	opsin-5-like(LOC101470865)	15	3076802	3091355
LOC101471037	101471037	WD repeat domain 26b(wdr26b)	15	6902029	6917630
dll4	101471139	delta-like 4 (Drosophila)(dll4)	15	5868529	5878076
LOC101471325	101471325	adenylate cyclase type 3(LOC101471325)	15	6882051	6900853
LOC101471811	101471811	alpha-N-acetylgalactosaminidase(LOC101471811)	15	6863288	6869774
LOC101471812	101471812	synapse differentiation inducing 1-like(syndig1l)	15	5145580	5189642
vegfa	101472090	vascular endothelial growth factor Ab(vegfab)	15	6812967	6829195
vrtn	101472091	vertebrae development associated(vrtn)	15	5089212	5097222
rsph9	101472389	radial spoke head component 9(rsph9)	15	6722372	6725904
LOC101472594	101472594	mitochondrial basic amino acids transporter(LOC101472594)	15	5065560	5073065
mrps18a	101472692	mitochondrial ribosomal protein S18A(mrps18a)	15	6725984	6731388
slc25a47	101472877	solute carrier family 25 member 47a(slc25a47a)	15	5045760	5050486
ubxn2a	101472878	UBX domain protein 2A(ubxn2a)	15	3151043	3157149
LOC101472984	101472984	transmembrane protein 63A(tmem63a)	15	6692871	6708802
LOC101473289	101473289	POU class 3 homeobox 2a(pou3f2a)	15	6620657	6624069
LOC101473371	101473371	thyroxine 5-deiodinase(LOC101473371)	15	4960837	4962370
LOC101473372	101473372	major facilitator superfamily domain containing 2B(mfsd2b)	15	3129026	3146937
LOC101473580	101473580	failed axon connections homolog, metaxin like GST domain containing a(faxca)	15	6607285	6618229
LOC101473650	101473650	protein phosphatase 2, regulatory subunit B', gamma b(ppp2r5cb)	15	4903926	4931925
wdcp	101473651	WD repeat and coiled coil containing(wdcp)	15	3124294	3128925
ccnc	101473877	cyclin C(ccnc)	15	6597991	6605935
LOC101474167	101474167	notochord granular surface(ngs)	15	6592707	6597263
fkbp1b	101474356	FKBP prolyl isomerase 1B(fkbp1b)	15	3114733	3124222
LOC101474541	101474541	heat shock protein 90, alpha (cytosolic), class A member 1, tandem duplicate 2(hsp90aa1.2)	15	4894445	4901580
mut	101474630	methylmalonyl CoA mutase(mmut)	15	3095017	3113805
pgm3	101474811	phosphoglucomutase 3(pgm3)	15	6587192	6592622
LOC101475013	101475013	heat shock protein 90, alpha (cytosolic), class A member 1, tandem duplicate 1(hsp90aa1.1)	15	4889661	4894108
LOC101475104	101475104	clathrin coat assembly protein AP180(LOC101475104)	15	6560681	6563736
LOC101475300	101475300	WD repeat domain 20b(wdr20b)	15	4878796	4887555
LOC101475403	101475403	synaptosome associated protein 91b(snap91b)	15	6553981	6585009
mgat2	101475602	alpha-1,6-mannosyl-glycoprotein 2-beta-N-acetylglucosaminyltransferase(mgat2)	15	4870003	4874361
rps29	101475891	ribosomal protein S29(rps29)	15	4866272	4867306
LOC101476186	101476186	low choriolytic enzyme-like(LOC101476186)	15	4648026	4649927
mdga2	101476673	MAM domain containing glycosylphosphatidylinositol anchor 2(mdga2)	15	4491147	4699154
LOC101476938	101476938	serine protease 23(LOC101476938)	15	6405551	6408719
fkbp3	101477137	FKBP prolyl isomerase 3(fkbp3)	15	4401318	4403448
LOC101477227	101477227	putative nucleotidyltransferase FAM46A(LOC101477227)	15	6376156	6379744
fau	101477419	FAU ubiquitin like and ribosomal protein S30 fusion a(faua)	15	4399216	4400952
LOC101477514	101477514	elongation of very long chain fatty acids protein 4(LOC101477514)	15	6312697	6320371
LOC101477798	101477798	uncharacterized protein KIAA0408(LOC101477798)	15	6291980	6297766
LOC101478077	101478077	protein SOGA3(LOC101478077)	15	6299289	6305829
prpf39	101478079	PRP39 pre-mRNA processing factor 39 homolog (yeast)(prpf39)	15	4390553	4397733
arf6	101478443	ADP-ribosylation factor 6a(arf6a)	15	4385397	4388455
rnf146	101478542	ring finger protein 146(rnf146)	15	6279889	6283159
LOC101478731	101478731	E3 ubiquitin-protein ligase pellino homolog 2(LOC101478731)	15	4363271	4375976
cenpw	101478818	centromere protein W(cenpw)	15	6275857	6277457
LOC101479009	101479009	homeobox protein OTX2(LOC101479009)	15	4336618	4341392
tpd52l1	101479100	tpd52 like 1(tpd52l1)	15	6256877	6272116
naa30	101479287	N-alpha-acetyltransferase 30, NatC catalytic subunit(naa30)	15	4314841	4322577
hddc2	101479576	HD domain containing 2(hddc2)	15	6271963	6275084
armh4	101479577	armadillo like helical domain containing 4(armh4)	15	4305900	4313525
nkain2	101480047	sodium/potassium transporting ATPase interacting 2(nkain2)	15	6132250	6236261
actr10	101480251	actin related protein 10(actr10)	15	4289645	4303495
trdn	101480340	triadin(trdn)	15	6067289	6091601
LOC101480538	101480538	vascular endothelial growth factor A-A(LOC101480538)	15	4279760	4286424
LOC101481016	101481016	uncharacterized LOC101481016(LOC101481016)	15	5252747	5264041
LOC101481017	101481017	CLOCK-interacting pacemaker b(cipcb)	15	4266530	4274514
akap7	101481314	A-kinase anchoring protein 7(akap7)	15	5265717	5312799
LOC101481315	101481315	ectonucleoside triphosphate diphosphohydrolase 5(LOC101481315)	15	4239959	4250349
znf410	101481984	zinc finger protein 410(znf410)	15	4249428	4265572
med23	101482184	mediator complex subunit 23(med23)	15	5331684	5404680
LOC101482278	101482278	leucine rich repeat and fibronectin type III domain containing 5b(lrfn5b)	15	4210746	4229452
LOC101482649	101482649	interleukin 20 receptor, alpha(il20ra)	15	5350996	5356620
LOC101483142	101483142	EH-domain containing 3(ehd3)	15	5362532	5382547
LOC101483143	101483143	methylmalonate-semialdehyde dehydrogenase [acylating], mitochondrial(LOC101483143)	15	4229892	4239753
LOC101483430	101483430	C-C motif chemokine 3(LOC101483430)	15	5394176	5395490
tbpl1	101483732	TBP-like 1(tbpl1)	15	7827123	7832343
stum	101483733	stum, mechanosensory transduction mediator homolog(stum)	15	5401110	5419860
LOC101483827	101483827	YY1 transcription factor b(yy1b)	15	4191825	4197077
coq8a	101484008	coenzyme Q8A, genome duplicate a(coq8aa)	15	5424295	5460367
slc2a12	101484365	solute carrier family 2 member 12(slc2a12)	15	7816543	7827379
LOC101484461	101484461	Enah/Vasp-like b(evlb)	15	4141210	4190491
sgk1	101484635	serum/glucocorticoid regulated kinase 1(sgk1)	15	7770677	7806686
itpkb	101484637	inositol-trisphosphate 3-kinase B(itpkb)	15	5461696	5491592
aldh8a1	101484926	aldehyde dehydrogenase 8 family, member A1(aldh8a1)	15	7710064	7714355
epb41l2	101485129	erythrocyte membrane protein band 4.1 like 2(epb41l2)	15	5502541	5552771
LOC101485130	101485130	echinoderm microtubule-associated protein-like 1(LOC101485130)	15	4127663	4136427
hbs1l	101485227	HBS1-like translational GTPase(hbs1l)	15	7681897	7707262
myb	101485681	v-myb avian myeloblastosis viral oncogene homolog(myb)	15	7664569	7672740
LOC101485781	101485781	bromo adjacent homology domain-containing 1 protein(LOC101485781)	15	4104325	4124085
LOC101486070	101486070	uncharacterized LOC101486070(LOC101486070)	15	4090754	4091680
pde7b	101486166	phosphodiesterase 7B(pde7b)	15	7598598	7624093
LOC101486361	101486361	MAX dimerization protein MGA-like(magl)	15	4060979	4086977
LOC101486653	101486653	galectin-3(LOC101486653)	15	4026071	4034954
mtfr2	101487416	mitochondrial fission regulator 2(mtfr2)	15	7581393	7585689
LOC101487507	101487507	mitogen-activated protein kinase-binding protein 1(LOC101487507)	15	4035204	4059222
LOC101487707	101487707	armadillo repeat containing 1, like(armc1l)	15	7577927	7581347
LOC105940728	105940728	uncharacterized LOC105940728(LOC105940728)	15	5552872	5558115
LOC105940732	105940732	alpha-N-acetylgalactosaminidase(LOC105940732)	15	6871934	6881330
LOC106676069	106676069	pinin-like(LOC106676069)	15	6994406	6996304
LOC106676072	106676072	uncharacterized LOC106676072(LOC106676072)	15	7589695	7594044
LOC106676582	106676582	low choriolytic enzyme-like(LOC106676582)	15	4653361	4655213
LOC106676583	106676583	uncharacterized LOC106676583(LOC106676583)	15	3391802	3394221
LOC112430063	112430063	uncharacterized LOC112430063(LOC112430063)	15	3388889	3391711
LOC112430065	112430065	putative nucleotidyltransferase FAM46A(LOC112430065)	15	6462003	6465405
LOC112435995	112435995	uncharacterized LOC112435995(LOC112435995)	15	5571176	5571796
LOC112436017	112436017	ankyrin repeat domain-containing protein 50-like(LOC112436017)	15	3926927	3928762
LOC112436024	112436024	zinc finger BED domain-containing protein 1-like(LOC112436024)	15	6341393	6343299
LOC112436025	112436025	C-C chemokine receptor type 2-like(LOC112436025)	15	6410722	6411600
LOC112436026	112436026	inactive serine protease 35-like(LOC112436026)	15	6500782	6501405
LOC112436041	112436041	trichohyalin-like(LOC112436041)	15	3994957	3996820
LOC112436044	112436044	uncharacterized LOC112436044(LOC112436044)	15	5765963	5766541
LOC112436046	112436046	inactive serine protease 35-like(LOC112436046)	15	6491177	6493377
LOC112436053	112436053	uncharacterized LOC112436053(LOC112436053)	15	4426904	4429292
LOC112436058	112436058	inactive serine protease 35-like(LOC112436058)	15	6501577	6502125

## Sheet: Eye Area LG16 NC_036795.1
NC_036795.1:107961-25195503
NCBI Gene symbol	NCBI Gene ID	DAVID Gene Name	Chromosome #	START	STOP
LOC101463598	101463598	Ras-related protein Rab-33B-like(zgc:101559)		11779054	11781716
itgb5	101463607	integrin, beta 5(itgb5)		8587781	8632508
LOC101463617	101463617	aryl hydrocarbon receptor(LOC101463617)		727643	764772
LOC101463720	101463720	uncharacterized LOC101463720(LOC101463720)		4601230	4606581
map3k13	101463743	mitogen-activated protein kinase kinase kinase 13(si:ch211-45c16.2)		20344521	20380140
znf654	101463744	zinc finger protein 654(znf654)		23182861	23199534
LOC101463813	101463813	olfactory receptor 10J4-like(LOC101463813)		5173975	5174892
LOC101463828	101463828	teleost multiple tissue opsin 2b(tmtops2b)		13265240	13295131
ndufa10	101463911	NADH:ubiquinone oxidoreductase subunit A10(ndufa10)		696942	702018
atf2	101463949	activating transcription factor 2(atf2)		17535313	17554402
lats2	101464018	large tumor suppressor kinase 2(lats2)		4607187	4634808
LOC101464026	101464026	zinc finger protein RFP(LOC101464026)		14812301	14814768
LOC101464088	101464088	olfactory receptor 13C2-like(LOC101464088)		5468429	5469370
LOC101464095	101464095	katanin p60 subunit A-like 1(katnal1)		11782095	11792821
LOC101464108	101464108	ETS variant transcription factor 5a(etv5a)		8680961	8691884
LOC101464115	101464115	olfactory receptor 6N2-like(LOC101464115)		5204102	5205019
st6gal2	101464130	ST6 beta-galactosamide alpha-2,6-sialyltranferase 2a(st6gal2a)		13225093	13272152
cntnap5	101464205	contactin associated protein family member 5(cntnap5)		505188	644412
epha3	101464237	eph receptor A3(epha3)		23323906	23415978
LOC101464243	101464243	sodium channel, voltage-gated, type I-like, alpha(scn1laa)		18655577	18683243
LOC101464244	101464244	ankyrin repeat and SOCS box protein 9(LOC101464244)		15995916	15999670
xpo4	101464308	exportin 4(xpo4)		4634897	4691866
gpr156	101464311	G protein-coupled receptor 156(gpr156)		14801498	14819730
LOC101464397	101464397	olfactory receptor 6N2-like(LOC101464397)		5215376	5216323
LOC101464466	101464466	opioid-binding protein/cell adhesion molecule homolog(LOC101464466)		20633528	20648684
ttc21b	101464521	tetratricopeptide repeat domain 21B(ttc21b)		18634664	18645080
LOC101464572	101464572	gamma-crystallin M2-like(LOC101464572)		8962662	8963685
il17d	101464592	interleukin 17d(il17d)		4698812	4702783
uxs1	101464598	UDP-glucuronate decarboxylase 1(uxs1)		13303444	13339913
fstl1	101464599	follistatin-like 1b(fstl1b)		14848614	14872192
LOC101464622	101464622	limb and neural patterns a(lnpa)		17433107	17444887
gpr143	101464718	G protein-coupled receptor 143(gpr143)		15983115	15993557
cflar	101464799	CASP8 and FADD like apoptosis regulator(cflar)		20466202	20476965
csrnp3	101464807	cysteine-serine-rich nuclear protein 3(csrnp3)		18592914	18625904
LOC101464856	101464856	gamma-crystallin M3-like(LOC101464856)		8986882	8987718
eef1akmt1	101464877	EEF1A lysine methyltransferase 1(eef1akmt1)		4694096	4699571
lg16h2orf40	101464884	ECRG4 augurin precursor a(ecrg4a)		13339998	13345047
LOC101465000	101465000	transducin beta like 1 X-linked(tbl1x)		15962607	15983109
LOC101465080	101465080	uncharacterized LOC101465080(LOC101465080)		14884183	14886493
galnt3	101465100	UDP-N-acetyl-alpha-D-galactosamine:polypeptide N-acetylgalactosaminyltransferase 3 (GalNAc-T3)(galnt3)		18625996	18634348
evx2	101465101	even-skipped homeobox 2(evx2)		17416067	17418540
ift88	101465168	intraflagellar transport 88 homolog(ift88)		4703354	4723802
nck2	101465176	NCK adaptor protein 2(nck2)		13359743	13401447
LOC101465267	101465267	uncharacterized LOC101465267(LOC101465267)		14891848	14898497
LOC101465339	101465339	gamma-crystallin M3-like(LOC101465339)		8978083	8978865
xirp2	101465386	xin actin binding repeat containing 2b(xirp2b)		18551907	18571328
hoxd12	101465387	homeobox D12a(hoxd12a)		17403678	17406004
LOC101465460	101465460	beta-1,3-galactosyltransferase 1(LOC101465460)		14944649	14947558
fam126b	101465475	family with sequence similarity 126 member B(fam126b)		20416330	20466223
LOC101465476	101465476	ephrin type-A receptor 6(LOC101465476)		23600316	23780423
anos1	101465481	anosmin 1(anos1)		15910368	15951243
LOC101465535	101465535	olfactory receptor-like protein OLF4(LOC101465535)		5270483	5271430
LOC101465623	101465623	gamma-crystallin M3-like(LOC101465623)		8974642	8975659
LOC101465673	101465673	homeobox D11a(hoxd11a)		17398518	17399992
LOC101465764	101465764	ADP-ribosylation factor-like protein 6(LOC101465764)		23781239	23784230
LOC101465770	101465770	uncharacterized LOC101465770(LOC101465770)		15888400	15904212
LOC101465838	101465838	olfactory receptor 6N2-like(LOC101465838)		5291308	5292228
fhl2	101465850	four and a half LIM domains 2(fhl2)		13423596	13428305
LOC101465930	101465930	gamma-crystallin M3-like(LOC101465930)		8970207	8971068
hoxd10	101465978	homeobox D10a(hoxd10a)		17392261	17394547
LOC101465979	101465979	neurofilament medium polypeptide(LOC101465979)		15848853	15879247
b3galt1	101466060	UDP-Gal:betaGlcNAc beta 1,3-galactosyltransferase, polypeptide 1b(b3galt1b)		18476748	18544223
lg16h2orf49	101466140	linkage group 16 C2orf49 homolog(lg16h2orf49)		13428978	13433084
LOC101466214	101466214	gamma-crystallin M3-like(LOC101466214)		9031771	9033009
hoxd3	101466264	homeobox D3a(hoxd3a)		17364408	17383859
znf385b	101466304	zinc finger protein 385B(znf385b)		10159637	10220840
LOC101466329	101466329	gap junction protein beta 8(gjb8)		4202002	4205215
stk39	101466357	serine threonine kinase 39(stk39)		18441752	18474773
dnajc15	101466404	DnaJ (Hsp40) homolog, subfamily C, member 15(dnajc15)		10073314	10079292
LOC101466508	101466508	gamma-crystallin M3(LOC101466508)		9030008	9036291
LOC101466548	101466548	disco-interacting protein 2 homolog A(dip2a)		20478362	20568214
LOC101466613	101466613	gap junction alpha-3 protein(LOC101466613)		4195204	4201564
gpr45	101466620	G protein-coupled receptor 45(gpr45)		13433846	13437354
fbxo47	101466638	F-box protein 47(fbxo47)		23784292	23792507
klhl6	101466645	kelch-like family member 6(klhl6)		15842220	15848568
sestd1	101466686	SEC14 and spectrin domains 1(sestd1)		10079940	10102168
cers6	101466824	ceramide synthase 6(cers6)		18418700	18440514
cldn14	101466907	claudin 14(cldn14)		23793655	23798525
ssfa2	101466945	ITPR interacting domain containing 2(itprid2)		10255362	10305701
LOC101466947	101466947	solute carrier family 22 member 4(LOC101466947)		10104024	10114483
LOC101467062	101467062	uncharacterized LOC101467062(zgc:153846)		9038586	9039386
zmym2	101467076	zinc finger, MYM-type 2(zmym2)		4144169	4178450
g6pc2	101467105	glucose-6-phosphatase catalytic subunit 2(g6pc2)		18403440	18406167
hoxd4	101467106	homeobox D4a(hoxd4a)		17374158	17377084
LOC101467107	101467107	immunoglobulin superfamily, member 3(igsf3)		15692526	15771245
neurod1	101467245	neuronal differentiation 1(neurod1)		10310955	10316312
cwc22	101467247	CWC22 spliceosome associated protein homolog(cwc22)		10228353	10245276
pou3f3	101467285	POU class 3 homeobox 3a(pou3f3a)		13449504	13452002
gpr34	101467336	G protein-coupled receptor 34b(gpr34b)		7405719	7408375
LOC101467353	101467353	gamma-crystallin M2-like(LOC101467353)		9041286	9042119
mphosph8	101467365	M-phase phosphoprotein 8(mphosph8)		4101696	4129116
hnrnpa3	101467394	heterogeneous nuclear ribonucleoprotein A3(hnrnpa3)		17260465	17265330
LOC101467395	101467395	ribulose-5-phosphate-3-epimerase(rpe)		15678446	15682637
itga4	101467543	integrin alpha 4(itga4)		10352815	10378105
cerkl	101467545	ceramide kinase-like(cerkl)		10319536	10352725
tmem182	101467579	transmembrane protein 182a(tmem182a)		13486058	13492831
spc25	101467607	SPC25 component of NDC80 kinetochore complex(spc25)		18405890	18410975
nyx	101467650	nyctalopin(nyx)		7330060	7342469
LOC101467669	101467669	gamma-crystallin M2-like(LOC101467669)		9043496	9044632
nfe2l2	101467713	nfe2 like bZIP transcription factor 2a(nfe2l2a)		17251067	17258065
LOC101467714	101467714	atypical chemokine receptor 3(LOC101467714)		15646162	15651594
rpl8	101467846	ribosomal protein L8(rpl8)		10419604	10422855
mfsd9	101467888	major facilitator superfamily domain containing 9(mfsd9)		13494787	13502456
LOC101467907	101467907	zinc finger protein 525(LOC101467907)		21206007	21208023
ddx3x	101467955	DEAD-box helicase 3 X-linked a(ddx3xa)		7312727	7328912
LOC101467975	101467975	gamma-crystallin M2-like(LOC101467975)		9044866	9047097
agps	101468014	alkylglycerone phosphate synthase(agps)		17217873	17246584
LOC101468015	101468015	helix-loop-helix protein 1(LOC101468015)		15624661	15625779
ttf2	101468075	transcription termination factor, RNA polymerase II(ttf2)		4089259	4100903
tspan7	101468080	tetraspanin 7b(tspan7b)		11805890	11819647
nostrin	101468105	nitric oxide synthase trafficking(nostrin)		18410664	18416933
LOC101468159	101468159	ubiquitin specific peptidase 9(usp9)		10424311	10460945
LOC101468198	101468198	olfactory receptor 2G3-like(LOC101468198)		24557264	24559146
LOC101468281	101468281	gamma-crystallin M2-like(LOC101468281)		9047774	9049421
pde11a	101468312	phosphodiesterase 11a(pde11a)		17162443	17215601
LOC101468313	101468313	vang-like protein 1(LOC101468313)		15600436	15622066
cenpj	101468379	centromere protein J(cenpj)		4077695	4088770
LOC101468388	101468388	SUMO specific peptidase 7(senp7)		11945432	11965675
prmt2	101468407	protein arginine methyltransferase 2(prmt2)		21208123	21212909
LOC101468408	101468408	high-affinity choline transporter 1(LOC101468408)		23800205	23809343
agpat3	101468489	1-acylglycerol-3-phosphate O-acyltransferase 3(agpat3)		24562553	24588056
lg16h2orf80	101468552	linkage group 16 C2orf80 homolog(lg16h2orf80)		9054091	9060947
LOC101468573	101468573	solute carrier family 9 member 2(slc9a2)		13502534	13514850
LOC101468594	101468594	cytochrome c-b(LOC101468594)		17159730	17161388
LOC101468668	101468668	rho GTPase-activating protein 20(LOC101468668)		3896753	3928127
tmem223	101468704	transmembrane protein 223(tmem223)		23857221	23858265
LOC101468798	101468798	pyridoxal kinase(LOC101468798)		24590180	24602713
LOC101468815	101468815	solute carrier family 5 member 3b(slc5a3b)		15570824	15577501
LOC101468858	101468858	gamma-crystallin M2-like(LOC101468858)		9050284	9051910
ercc1	101468887	excision repair cross-complementation group 1(ercc1)		21213788	21219994
LOC101468963	101468963	probable ribonuclease ZC3H12C(LOC101468963)		3789604	3816147
LOC101468972	101468972	filamin A-interacting protein 1-like(LOC101468972)		12164483	12168923
gcc2	101468995	GRIP and coiled-coil domain containing 2(gcc2)		23841208	23860395
nup35	101469039	nucleoporin 35(nup35)		7298456	7304350
LOC101469077	101469077	HRAS-like suppressor 2(LOC101469077)		13517675	13521594
chpf	101469087	chondroitin polymerizing factor a(chpfa)		24608373	24616500
osbpl6	101469107	oxysterol binding protein-like 6(osbpl6)		17108747	17153559
kcne2	101469108	potassium voltage-gated channel subfamily E regulatory subunit 2(kcne2)		15570876	15590723
LOC101469160	101469160	shugoshin 2(sgo2)		9062386	9074713
LOC101469195	101469195	neuroligin-4, X-linked(LOC101469195)		21260857	21284884
abcb11	101469200	ATP-binding cassette, sub-family B (MDR/TAP), member 11a(abcb11a)		18392227	18401968
LOC101469272	101469272	radixin(LOC101469272)		3816515	3864711
phf11	101469280	PHD finger protein 11(phf11)		12675743	12688484
LOC101469379	101469379	inositol polyphosphate-4-phosphatase type I Aa(inpp4aa)		13515669	13540441
asic4	101469386	acid-sensing (proton-gated) ion channel family member 4a(asic4a)		24619117	24715806
LOC101469398	101469398	LIM and senescent cell antigen-like-containing domain protein 1(LOC101469398)		23878337	23915057
dopey2	101469402	DOP1 leucine zipper like protein B(dop1b)		15533216	15569035
pikfyve	101469447	phosphoinositide kinase, FYVE finger containing(pikfyve)		9077614	9108561
LOC101469491	101469491	retinol dehydrogenase 1(rdh1)		18375886	18382267
dnajc10	101469519	DnaJ (Hsp40) homolog, subfamily C, member 10(dnajc10)		7280066	7296164
LOC101469549	101469549	interleukin 1 receptor-like 1(il1rl1)		3753996	3774059
LOC101469554	101469554	probable phospholipid-transporting ATPase IH(LOC101469554)		12746977	12778694
med14	101469612	mediator complex subunit 14(med14)		10466783	10479003
LOC101469650	101469650	cytochrome c oxidase assembly factor 5(LOC101469650)		13546107	13548480
LOC101469654	101469654	olfactory receptor 142-like(LOC101469654)		24534016	24536287
LOC101469750	101469750	uncharacterized LOC101469750(LOC101469750)		21311421	21314506
LOC101469756	101469756	dehydrogenase/reductase (SDR family) member 9(dhrs9)		18382264	18387816
prkra	101469757	protein kinase, interferon-inducible double stranded RNA dependent activator(prkra)		17089927	17107042
pde1a	101469790	phosphodiesterase 1A, calmodulin-dependent(pde1a)		7171694	7214521
rnf17	101469824	ring finger protein 17(rnf17)		4039458	4076133
arhgef7	101469833	Rho guanine nucleotide exchange factor (GEF) 7a(arhgef7a)		12887361	12925641
morc3	101469862	MORC family CW-type zinc finger 3a(morc3a)		15511238	15530771
LOC101469930	101469930	uncharacterized LOC101469930(si:dkey-4e7.3)		13541457	13546499
LOC101469937	101469937	olfactory receptor 142-like(LOC101469937)		24539955	24540884
LOC101469947	101469947	matrix-remodeling-associated protein 5(LOC101469947)		21328109	21344373
LOC101470035	101470035	ATP synthase subunit beta, mitochondrial(LOC101470035)		18314983	18318141
LOC101470036	101470036	caspase 10, apoptosis-related cysteine peptidase(casp10)		17080933	17086210
LOC101470069	101470069	SH3 domain-binding protein 4(LOC101470069)		7095287	7143551
rev1	101470115	REV1 DNA directed polymerase(rev1)		12952864	12964449
dapl1	101470138	death associated protein like 1(dapl1)		20155297	20157256
chaf1b	101470148	chromatin assembly factor 1, subunit B(chaf1b)		15482880	15496100
LOC101470223	101470223	olfactory receptor 6N1-like(LOC101470223)		24548565	24549494
LOC101470229	101470229	arylsulfatase H(arsh)		21377197	21386040
LOC101470276	101470276	uncharacterized LOC101470276(si:ch211-218d20.15)		10480692	10485024
ccdc89	101470328	coiled-coil domain-containing protein 89(zgc:172182)		18317654	18322975
mgat4a	101470408	alpha-1,3-mannosyl-glycoprotein 4-beta-N-acetylglucosaminyltransferase A(mgat4a)		13548672	13578110
LOC101470409	101470409	cell surface A33 antigen(LOC101470409)		13036168	13040259
LOC101470513	101470513	GTPase IMAP family member 8(LOC101470513)		24550373	24555061
LOC101470563	101470563	ADP-ribosylation factor-like protein 4C(LOC101470563)		7058364	7060012
LOC101470569	101470569	protein phosphatase 2, regulatory subunit B'', beta(ppp2r3b)		10504401	10522943
plekhm3	101470574	pleckstrin homology domain containing, family M, member 3(plekhm3)		1996761	2046060
pkp4	101470620	plakophilin 4(pkp4)		20060317	20151032
LOC101470621	101470621	RAN binding protein 2(ranbp2)		23917029	23939758
adam23	101470628	ADAM metallopeptidase domain 23(adam23)		17049550	17071799
LOC101470629	101470629	uncharacterized LOC101470629(si:dkey-229b18.3)		15466340	15477883
fer1l6	101470698	fer-1 like family member 6(fer1l6)		1131663	1205081
LOC101470709	101470709	junctional adhesion molecule 2b(jam2b)		13138919	13158875
creg2	101470906	cellular repressor of E1A-stimulated genes 2(creg2)		13578973	13582429
bcl9	101470931	BCL9 transcription coactivator(bcl9)		15416405	15445880
LOC101470996	101470996	otospiralin 2(otos2)		13351652	13352509
lrp2	101471014	low density lipoprotein receptor-related protein 2a(lrp2a)		18322308	18375345
LOC101471047	101471047	cohesin subunit SA-2(si:ch211-269e2.1)		10488041	10504307
sf3b1	101471054	splicing factor 3b, subunit 1(sf3b1)		9148479	9164974
LOC101471064	101471064	uncharacterized LOC101471064(si:ch211-67e16.4)		1205592	1214635
LOC101471096	101471096	putative uncharacterized protein DDB_G0290521(si:ch211-39i22.1)		21388466	21408392
nxpe3	101471181	neurexophilin and PC-esterase domain family, member 3(nxpe3)		13606816	13615443
fzd5	101471247	frizzled class receptor 5(fzd5)		2054727	2058922
LOC101471274	101471274	gastrin-releasing peptide receptor(LOC101471274)		13870547	13875298
ccdc148	101471290	coiled-coil domain containing 148(ccdc148)		20034139	20060194
tpt1	101471291	tumor protein, translationally-controlled 1(tpt1)		23940943	23946460
LOC101471335	101471335	short stature homeobox(shox)		10609050	10619543
acp6	101471397	acid phosphatase 6, lysophosphatidic(acp6)		15409537	15415401
rubcnl	101471432	rubicon like autophagy enhancer(rubcnl)		6724117	6743384
rpl24	101471469	ribosomal protein L24(rpl24)		13622489	13627163
LOC101471533	101471533	cyclin Y-like 1(ccnyl1)		2062567	2073103
LOC101471537	101471537	coenzyme Q10B(coq10b)		9167066	9180436
col4a2	101471561	collagen, type IV, alpha 2(col4a2)		14143570	14205850
LOC101471579	101471579	uncharacterized protein C7orf57 homolog(LOC101471579)		20026056	20030757
kctd4	101471580	potassium channel tetramerization domain containing 4(kctd4)		23976514	23978455
LOC101471588	101471588	collagen, type XXVIII, alpha 2a(col28a2a)		18295030	18311920
gpr1	101471589	chemerin chemokine-like receptor 2(cmklr2)		17041812	17044989
LOC101471748	101471748	titin, tandem duplicate 2(ttn.2)		1231869	1452543
cep97	101471762	centrosomal protein 97(cep97)		13617574	13622381
hspd1	101471832	heat shock 60 protein 1(hspd1)		9187595	9196553
btla	101471858	B and T lymphocyte associated(btla)		14706958	14710304
LOC101471877	101471877	general transcription factor IIF subunit 2(LOC101471877)		23947299	24013265
bbs5	101471885	Bardet-Biedl syndrome 5(bbs5)		18286763	18293302
ino80d	101471886	INO80 complex subunit D(ino80d)		17023391	17032250
lrch1	101472008	leucine-rich repeats and calponin homology (CH) domain containing 1(lrch1)		6612382	6720702
asmtl	101472013	acetylserotonin O-methyltransferase-like(asmtl)		10716826	10723382
creb1	101472017	cAMP responsive element binding protein 1b(creb1b)		2076503	2087892
LOC101472036	101472036	uncharacterized LOC101472036(LOC101472036)		1458834	1461717
mpc2	101472046	mitochondrial pyruvate carrier 2b(mpc2b)		13629510	13637382
LOC101472107	101472107	MOB-like protein phocein(LOC101472107)		9197002	9210424
lrrc58	101472127	leucine rich repeat containing 58b(lrrc58b)		14825583	14836588
LOC101472147	101472147	sorting nexin 4(snx4)		21410569	21418442
klhl41	101472158	kelch-like family member 41a(klhl41a)		18282710	18286224
ndufs1	101472159	NADH:ubiquinone oxidoreductase core subunit S1(ndufs1)		17032404	17041257
LOC101472222	101472222	diazepam binding inhibitor (GABA receptor modulator, acyl-CoA binding protein)(dbi)		1580957	1584264
upp2	101472253	uridine phosphorylase 2(upp2)		20031219	20033538
p2ry8	101472297	P2Y receptor family member 8(p2ry8)		10727802	10731692
LOC101472303	101472303	Kruppel-like factor 7b(klf7b)		2140305	2207140
LOC101472453	101472453	TSC22 domain family protein 1(LOC101472453)		24031338	24073193
fastkd1	101472460	FAST kinase domains 1(fastkd1)		18276306	18281948
lg16h2orf76	101472530	linkage group 16 C2orf76 homolog(lg16h2orf76)		1594019	1603381
LOC101472546	101472546	MID1 interacting protein 1a(mid1ip1a)		11828036	11830044
acvr1	101472561	activin A receptor type 1(acvr1)		19995914	20023787
upf3a	101472608	UPF3A regulator of nonsense mediated mRNA decay(upf3a)		10732741	10737975
LOC101472614	101472614	growth differentiation factor 3(gdf3)		2353702	2355957
rftn2	101472620	raftlin family member 2(rftn2)		9210478	9238086
LOC101472658	101472658	indian hedgehog B protein(LOC101472658)		21442590	21449514
LOC101472661	101472661	serine/threonine kinase 24a (STE20 homolog, yeast)(stk24a)		17004283	17020842
gja5	101472662	gap junction protein alpha 5(gja5)		15398380	15407470
c1ql2	101472811	complement component 1, q subcomponent-like 2(c1ql2)		1623084	1624654
LOC101472824	101472824	cyclic AMP receptor-like protein A(si:dkey-100n23.5)		11833308	11884948
LOC101472825	101472825	DDB1- and CUL4-associated factor 6(LOC101472825)		13658309	13683869
trappc10	101472897	trafficking protein particle complex subunit 10(trappc10)		2358563	2380431
plcl1	101472903	phospholipase C like 1(plcl1)		9274830	9420631
bin1	101472947	bridging integrator 1(bin1)		21450621	21467014
dock9	101472950	dedicator of cytokinesis 9(zmp:0000001200)		16913162	16986613
LOC101473107	101473107	macrophage receptor with collagenous structure(marco)		1654790	1679686
bcor	101473120	BCL6 corepressor(bcor)		11888567	11926947
serp2	101473135	stress-associated endoplasmic reticulum protein family member 2(serp2)		24074920	24083445
gja8	101473142	gap junction protein alpha 8(gja8)		15372023	15373534
LOC101473197	101473197	cyclic nucleotide gated channel subunit alpha 4(cnga4)		2380872	2386339
satb2	101473204	SATB homeobox 2(satb2)		9496664	9547720
LOC101473255	101473255	transmembrane protein 198a(tmem198a)		21468726	21509359
ppig	101473347	peptidylprolyl isomerase G (cyclophilin G)(ppig)		18268380	18275670
LOC101473404	101473404	engrailed homeobox 1a(en1a)		1698542	1702566
atp6ap2	101473418	ATPase H+ transporting accessory protein 2(atp6ap2)		11933967	11940439
LOC101473430	101473430	alsin(LOC101473430)		24132373	24165750
LOC101473437	101473437	uncharacterized LOC101473437(LOC101473437)		15362427	15365091
esd	101473475	esterase D/formylglutathione hydrolase(esd)		6605176	6611165
LOC101473491	101473491	FHF complex subunit HOOK interacting protein 1B(fhip1b)		2387161	2424539
LOC101473544	101473544	desmin a(desma)		21510947	21518476
LOC101473631	101473631	FERM, ARHGEF and pleckstrin domain-containing protein 1(LOC101473631)		16853442	16912003
LOC101473701	101473701	uncharacterized LOC101473701(LOC101473701)		11941829	11943288
LOC101473718	101473718	frizzled-7-A(LOC101473718)		24185065	24189551
LOC101473725	101473725	uncharacterized LOC101473725(LOC101473725)		15342180	15346155
htr2a	101473765	5-hydroxytryptamine (serotonin) receptor 2A, genome duplicate a(htr2aa)		6352098	6449278
cdc16	101473773	cell division cycle 16 homolog (S. cerevisiae)(cdc16)		10739686	10749728
ccdc173	101473841	cilia and flagella associated protein 210(cfap210)		18261640	18266417
tbccd1	101473894	TBCC domain containing 1(tbccd1)		9579972	9595436
impg2	101473914	interphotoreceptor matrix proteoglycan 2a(impg2a)		11966951	11992742
LOC101473925	101473925	protein tyrosine phosphatase receptor type Na(ptprna)		21524970	21546597
acvr1c	101474023	activin A receptor type 1C(acvr1c)		19979279	19994183
LOC101474024	101474024	odorant receptor, family 64, subfamily A, member 1(or64a1)		24257741	24258655
LOC101474032	101474032	nectin-3(LOC101474032)		15198818	15205722
sucla2	101474071	succinate-CoA ligase ADP-forming subunit beta(sucla2)		6172895	6200317
LOC101474080	101474080	CFAP97 domain containing 2(cfap97d2)		10750233	10752555
LOC101474112	101474112	uncharacterized LOC101474112(LOC101474112)		13721197	13723138
LOC101474182	101474182	ankyrin repeat domain 50-like(ankrd50l)		2433377	2449030
LOC101474210	101474210	target of Nesh-SH3(LOC101474210)		12026510	12051590
LOC101474228	101474228	poliovirus receptor(LOC101474228)		15184571	15192593
LOC101474315	101474315	protein TANC1(LOC101474315)		20161057	20277625
med4	101474359	mediator complex subunit 4(med4)		6167943	6172774
itgbl1	101474368	integrin, beta-like 1(itgbl1)		10879828	10932404
dnajb11	101474382	DnaJ heat shock protein family (Hsp40) member B11(dnajb11)		9560767	9580536
dnajb2	101474424	DnaJ heat shock protein family (Hsp40) member B2(dnajb2)		21546691	21556803
phgdh	101474426	phosphoglycerate dehydrogenase(phgdh)		18251964	18258490
cytip	101474499	cytohesin 1 interacting protein(cytip)		19973266	19976772
LOC101474505	101474505	nectin-3-like(si:ch211-214p13.3)		15072574	15177137
LOC101474573	101474573	X-linked retinitis pigmentosa GTPase regulator(LOC101474573)		13730364	13745770
prpf40a	101474592	PRP40 pre-mRNA processing factor 40 homolog A(prpf40a)		19649894	19665282
itm2b	101474632	integral membrane protein 2B(itm2b)		6144282	6165507
fgf14	101474637	fibroblast growth factor 14(fgf14)		10769706	10879344
olig1	101474644	oligodendrocyte transcription factor 1(olig1)		2497234	2498845
crygs	101474650	crystallin, gamma S2(crygs2)		9598265	9600026
klhl23	101474706	kelch-like family member 23(klhl23)		18245850	18249750
LOC101474707	101474707	ras-related protein Rap-2a(LOC101474707)		16826994	16843149
srpx	101474853	sushi-repeat containing protein X-linked(srpx)		13751431	13771113
LOC101474867	101474867	tumor necrosis factor receptor superfamily member 14(LOC101474867)		19250941	19255963
olig2	101474925	oligodendrocyte lineage transcription factor 2(olig2)		2514996	2517068
lcmt2	101474934	leucine carboxyl methyltransferase 2(lcmt2)		9601236	9608862
galnt5	101474982	polypeptide N-acetylgalactosaminyltransferase 5(galnt5)		19963609	19969297
mettl5	101474988	methyltransferase 5, N6-adenosine(mettl5)		18232970	18235162
LOC101474989	101474989	muscleblind-like protein 2a(LOC101474989)		16810911	16826519
LOC101475061	101475061	tubulin alpha chain-like(LOC101475061)		21563143	21565142
LOC101475106	101475106	GDP-Man:Man(3)GlcNAc(2)-PP-Dol alpha-1,2-mannosyltransferase(LOC101475106)		6114241	6119578
LOC101475161	101475161	collagen alpha-2(VI) chain(LOC101475161)		19223653	19240739
dhrs12	101475214	dehydrogenase/reductase (SDR family) member 12(dhrs12)		2568458	2573123
dbr1	101475223	debranching RNA lariats 1(dbr1)		9616790	9621163
LOC101475249	101475249	jagunal homolog 1a(jagn1a)		12066346	12067766
LOC101475273	101475273	uncharacterized LOC101475273(LOC101475273)		19969293	19971016
nalcn	101475310	sodium leak channel, non-selective(nalcn)		10935420	11007291
LOC101475406	101475406	serine/threonine-protein kinase Nek5(LOC101475406)		6120071	6140067
trpm2	101475454	transient receptor potential cation channel, subfamily M, member 2(trpm2)		20383425	20401426
ssb	101475458	small RNA binding exonuclease protection factor La(ssb)		18234724	18243972
wdfy2	101475510	WD repeat and FYVE domain containing 2(wdfy2)		2573439	2597054
LOC101475520	101475520	RAB5B, member RAS oncogene family(rab5b)		9609189	9616457
tfg	101475548	trafficking from ER to golgi regulator(tfg)		12052139	12065855
sytl5	101475549	synaptotagmin-like 5(sytl5)		13775625	13827777
LOC101475575	101475575	tubulin alpha chain(LOC101475575)		21568685	21584034
nr4a2	101475755	nuclear receptor subfamily 4, group A, member 2a(nr4a2a)		19873302	19880240
LOC101475756	101475756	sacsin(LOC101475756)		21199923	21205840
ubr3	101475760	ubiquitin protein ligase E3 component n-recognin 3(ubr3)		18186896	18231564
LOC101475761	101475761	uncharacterized LOC101475761(LOC101475761)		15046728	15063264
armc8	101475814	armadillo repeat containing 8(armc8)		9621329	9647473
lcp1	101475899	lymphocyte cytosolic protein 1 (L-plastin)(lcp1)		6093020	6107063
tanc1	101475961	tetratricopeptide repeat, ankyrin repeat and coiled-coil containing 1(tanc1)		19149823	19191118
tmtc4	101476007	transmembrane O-mannosyltransferase targeting cadherins 4(tmtc4)		11037553	11050536
ints6	101476013	integrator complex subunit 6(ints6)		2599892	2620142
col8a1	101476033	collagen, type VIII, alpha 1a(col8a1a)		12069560	12081286
LOC101476047	101476047	SON DNA and RNA binding protein a(sona)		21221057	21235180
myo3b	101476052	myosin IIIB(myo3b)		18115998	18180393
LOC101476106	101476106	integrin, beta 2(itgb2)		9840535	9870106
cnot11	101476194	CCR4-NOT transcription complex, subunit 11(cnot11)		6087274	6092352
dynlt3	101476234	dynein light chain Tctex-type 3(dynlt3)		13829927	13834723
LOC101476249	101476249	uncharacterized LOC101476249(LOC101476249)		19776545	19777771
LOC101476258	101476258	WD repeat, SAM and U-box domain-containing protein 1(LOC101476258)		19133897	19147649
zic2	101476297	zic family member 2 (odd-paired homolog, Drosophila), a(zic2a)		11170501	11174573
dcbld2	101476324	discoidin, CUB and LCCL domain containing 2(dcbld2)		12111769	12133035
pofut2	101476334	protein O-fucosyltransferase 2(pofut2)		21585287	21593048
kcnj3	101476452	potassium inwardly rectifying channel subfamily J member 3a(kcnj3a)		19747628	19771364
hs6st3	101476457	heparan sulfate 6-O-sulfotransferase 3b(hs6st3b)		16704827	16799735
LOC101476495	101476495	transmembrane protein 237A(LOC101476495)		6034947	6049718
serpine3	101476503	serpin peptidase inhibitor, clade E (nexin, plasminogen activator inhibitor type 1), member 3(serpine3)		2620293	2625997
xk	101476532	X-linked Kx blood group (McLeod syndrome)(xk)		13834935	13844253
sp5	101476547	Sp5 transcription factor a(sp5a)		18111030	18113231
ifih1	101476548	interferon induced with helicase C domain 1(ifih1)		18950340	18963037
zic5	101476580	zic family member 5 (odd-paired homolog, Drosophila)(zic5)		11178673	11183131
abca12	101476632	ATP-binding cassette, sub-family A (ABC1), member 12(abca12)		21596080	21657499
LOC101476633	101476633	microtubule-associated protein 2(map2)		22532205	22634337
thsd7b	101476654	thrombospondin, type I, domain containing 7Ba(thsd7ba)		25023987	25216769
galnt13	101476737	UDP-N-acetyl-alpha-D-galactosamine:polypeptide N-acetylgalactosaminyltransferase 13(galnt13)		19703027	19737845
dnajc3	101476744	DnaJ (Hsp40) homolog, subfamily C, member 3a(dnajc3a)		16644597	16658632
LOC101476771	101476771	abl interactor 2(LOC101476771)		6049824	6086865
fam124a	101476784	family with sequence similarity 124 member A(fam124a)		2634589	2660082
gad1	101476828	glutamate decarboxylase 1(gad1)		18084038	18106318
LOC101476829	101476829	sodium channel protein type 2 subunit alpha(LOC101476829)		18695935	18742559
clybl	101476866	citrate lyase beta like(clybl)		11196936	11264150
LOC101476906	101476906	BRCA1 associated RING domain 1(bard1)		21659959	21683713
stx19	101476907	syntaxin 19(stx19)		23473678	23482517
cxcr4	101476920	chemokine (C-X-C motif), receptor 4b(cxcr4b)		24951019	24953138
LOC101476990	101476990	interleukin 1 receptor accessory protein-like 1a(il1rapl1a)		12352880	12539166
lancl3	101476991	LanC like 3(lancl3)		13847307	13856853
uggt2	101477014	UDP-glucose glycoprotein glucosyltransferase 2(uggt2)		16660684	16703480
enox1	101477049	ecto-NOX disulfide-thiol exchanger 1(enox1)		5865596	6009353
LOC101477113	101477113	calcium-binding mitochondrial carrier protein Aralar1(LOC101477113)		17965882	17987697
LOC101477149	101477149	uncharacterized LOC101477149(si:ch211-184m13.4)		11278271	11282942
LOC101477212	101477212	protein lifeguard 3(LOC101477212)		24910424	24916292
tsn	101477246	translin(tsn)		2662195	2665589
piga	101477271	phosphatidylinositol glycan anchor biosynthesis, class A(piga)		13887132	13897468
lacc1	101477327	laccase (multicopper oxidoreductase) domain containing 1(lacc1)		5850937	5857657
ndp	101477357	norrin cystine knot growth factor NDP(ndp)		7756816	7783008
rprm	101477383	reprimo, TP53 dependent G2 arrest mediator candidate a(rprma)		19699726	19700809
LOC101477388	101477388	homeobox D9a(hoxd9a)		17388288	17390675
gpr183	101477433	G protein-coupled receptor 183a(gpr183a)		11289972	11295705
LOC101477464	101477464	nuclear receptor subfamily 0, group B, member 1(nr0b1)		12543470	12545032
LOC101477528	101477528	uncharacterized LOC101477528(si:dkey-91i10.2)		2665702	2735011
LOC101477556	101477556	ankyrin repeat and SOCS box containing 11(asb11)		13879741	13886044
vwc2l	101477575	von Willebrand factor C domain containing 2 like(vwc2l)		21689791	21715650
LOC101477611	101477611	piggyBac transposable element-derived protein 4(LOC101477611)		5834983	5842075
fmnl2	101477660	formin-like 2a(fmnl2a)		19599719	19649174
gorasp2	101477661	golgi reassembly stacking protein 2(LOC101477661)		18065257	18072483
LOC101477662	101477662	solute carrier family 15 member 1a(slc15a1a)		16986691	16994607
dars	101477683	aspartyl-tRNA synthetase 1(dars1)		24916382	24948265
lg16hxorf21	101477740	linkage group 16 CXorf21 homolog(lg16hxorf21)		12571563	12573288
rbm44	101477819	RNA binding motif protein 44(rbm44)		8647761	8668701
fundc1	101477832	FUN14 domain containing 1(fundc1)		7804297	7807334
itgav	101477896	integrin, alpha V(itgav)		5786772	5826081
LOC101477963	101477963	chondromodulin(cnmd)		16279954	16283087
pnkd	101477984	PNKD metallo-beta-lactamase domain containing(pnkd)		24902892	24909757
rnaseh2b	101478032	ribonuclease H2, subunit B(rnaseh2b)		12579184	12585722
LOC101478043	101478043	olfactory receptor 9A4-like(LOC101478043)		24195595	24197169
LOC101478098	101478098	diacylglycerol kinase beta(LOC101478098)		8709079	8872478
efhc2	101478111	EF-hand domain (C-terminal) containing 2(efhc2)		7792962	7804192
LOC101478162	101478162	Alpha-aspartyl dipeptidase-like(si:dkey-69o16.5)		5778196	5786560
LOC101478229	101478229	IKAROS family zinc finger 2(ikzf2)		21946088	21968265
tlk1	101478234	tousled-like kinase 1a(tlk1a)		18050041	18065047
LOC101478235	101478235	claudin-10(LOC101478235)		16627229	16628797
LOC101478236	101478236	endothelin receptor type Bb(ednrbb)		16266859	16269863
gpr18	101478283	G protein-coupled receptor 18(gpr18)		11300351	11302951
LOC101478308	101478308	amyloid-beta A4 protein(LOC101478308)		13915655	13933559
LOC101478317	101478317	olfactory receptor 11A1-like(LOC101478317)		24202703	24203629
LOC101478374	101478374	cytochrome P450(si:dkey-91i10.3)		2757811	2769088
LOC101478380	101478380	beta-crystallin S-1-like(LOC101478380)		8964271	8964997
gmppa	101478431	GDP-mannose pyrophosphorylase Aa(gmppaa)		24887236	24898087
LOC101478446	101478446	transforming growth factor beta receptor-like(tgfbr2l)		5762061	5776538
trim13	101478488	tripartite motif containing 13(trim13)		12630230	12632633
dcaf17	101478513	ddb1 and cul4 associated factor 17(dcaf17)		18014107	18043750
LOC101478557	101478557	dachshund d(dachd)		11317662	11412336
kdm6a	101478580	lysine (K)-specific demethylase 6A(kdm6a)		7808476	7859040
LOC101478599	101478599	olfactory receptor 4D1-like(LOC101478599)		24209073	24209999
LOC101478647	101478647	solute carrier family 15 member 2(slc15a2)		2776139	2797476
LOC101478653	101478653	gamma-crystallin M2-like(LOC101478653)		8967223	8968253
LOC101478697	101478697	claudin-10(LOC101478697)		16623038	16626590
lmln	101478735	leishmanolysin-like (metallopeptidase M8 family)(lmln)		5746040	5758933
LOC101478758	101478758	secretin receptor(LOC101478758)		1555277	1570131
gabpa	101478766	GA binding protein transcription factor subunit alpha(gabpa)		13933618	13942555
mettl8	101478788	methyltransferase 8, methylcytidine(mettl8)		18043267	18049616
LOC101478789	101478789	toll-like receptor 7(LOC101478789)		16128995	16129934
LOC101478875	101478875	receptor tyrosine-protein kinase erbB-4(LOC101478875)		21982214	22340677
LOC101478876	101478876	olfactory receptor 4D1-like(LOC101478876)		24210940	24212340
dirc2	101478930	solute carrier family 49 member 4(slc49a4)		2815585	2864858
ankrd44	101478932	ankyrin repeat domain 44(ankrd44)		9111018	9143451
spryd7	101478958	SPRY domain containing 7b(spryd7b)		12633252	12640728
LOC101478982	101478982	claudin-10(LOC101478982)		16620178	16622651
slc35a5	101479051	solute carrier family 35 member A5(slc35a5)		8049673	8059815
ofd1	101479078	OFD1 centriole and centriolar satellite protein(ofd1)		16090296	16099380
cps1	101479159	carbamoyl-phosphate synthase 1, mitochondrial(cps1)		22457589	22517100
LOC101479160	101479160	olfactory receptor 52E8-like(LOC101479160)		24225326	24226096
LOC101479197	101479197	olfactory receptor 6N2-like(LOC101479197)		5639743	5640669
LOC101479207	101479207	Kruppel-like factor 5b(klf5b)		11451516	11455951
hspbap1	101479213	hspb associated protein 1(hspbap1)		2799057	2815477
LOC101479217	101479217	potassium voltage-gated channel, subfamily H (eag-related), member 3(kcnh3)		9647645	9824974
kpna3	101479238	karyopherin alpha 3 (importin alpha 4)(kpna3)		12640940	12659614
LOC101479259	101479259	multidrug resistance-associated protein 4(LOC101479259)		16576241	16615212
LOC101479353	101479353	immunoglobulin superfamily member 3(LOC101479353)		15821978	15838520
LOC101479435	101479435	U2 small nuclear RNA auxiliary factor 1(u2af1)		13943844	13950751
LOC101479453	101479453	myosin, light chain 1, alkali; skeletal, fast(myl1)		22526685	22532055
LOC101479454	101479454	putative gustatory receptor clone PTE01(LOC101479454)		24227477	24228412
cask	101479494	calcium/calmodulin-dependent serine protein kinase a(caska)		7348317	7515218
klf12	101479502	Kruppel-like factor 12b(klf12b)		11457220	11499138
rcbtb1	101479535	RCC1 and BTB domain containing protein 1(LOC101479535)		12661230	12675685
LOC101479636	101479636	calsequestrin 2(casq2)		15591994	15596909
sema5b	101479684	sema domain, seven thrombospondin repeats (type 1 and type 1-like), transmembrane domain (TM) and short cytoplasmic domain, (semaphorin) 5Ba(sema5ba)		2895848	3097456
LOC101479719	101479719	cystathionine beta-synthase(LOC101479719)		13963607	13976342
LOC101479733	101479733	putative gustatory receptor clone PTE01(LOC101479733)		24230647	24231603
sox21	101479738	SRY-box transcription factor 21b(sox21b)		16550483	16552718
frzb	101479769	frizzled related protein(frzb)		7240666	7268040
LOC101479826	101479826	small ubiquitin like modifier 3b(sumo3b)		19589999	19595911
LOC101479831	101479831	cytochrome b reductase 1(LOC101479831)		18009918	18012188
LOC101479907	101479907	KAT8 regulatory NSL complex subunit 1-like(kansl1l)		22638838	22655653
LOC101479914	101479914	poliovirus receptor(LOC101479914)		15288221	15309531
pdia5	101479968	protein disulfide isomerase family A, member 5(pdia5)		3098770	3180844
LOC101480000	101480000	mcf.2 cell line derived transforming sequence-like b(mcf2lb)		12690245	12738752
LOC101480013	101480013	olfactory receptor 6N1-like(LOC101480013)		24240151	24241092
LOC101480018	101480018	glypican-6(LOC101480018)		16442220	16522274
LOC101480051	101480051	dual specificity protein phosphatase 19-like(LOC101480051)		7222388	7230741
LOC101480086	101480086	coiled-coil domain containing 80(ccdc80)		8029978	8049070
LOC101480115	101480115	PTTG1 interacting protein b(pttg1ipb)		19583515	19588945
LOC101480119	101480119	cytoplasmic dynein 1 intermediate chain 2(LOC101480119)		17987647	18009361
tbc1d4	101480160	TBC1 domain family, member 4(tbc1d4)		11527985	11556901
me3	101480202	malic enzyme 3, NADP(+)-dependent, mitochondrial(me3)		13586457	13599776
LOC101480215	101480215	nectin-3(LOC101480215)		15247246	15257475
sec22a	101480266	SEC22 homolog A, vesicle trafficking protein(sec22a)		3187774	3200850
LOC101480310	101480310	olfactory receptor 6C4-like(LOC101480310)		24264462	24268554
dct	101480314	dopachrome tautomerase(dct)		16522418	16535855
f5	101480372	coagulation factor V(f5)		8062107	8082684
LOC101480385	101480385	salt-inducible kinase 1(sik1)		14019054	14029480
LOC101480403	101480403	myosin X, like 3(myo10l3)		19521506	19581799
wars2	101480477	tryptophanyl tRNA synthetase 2, mitochondrial(wars2)		4423747	4453988
adcy5	101480556	adenylate cyclase 5(adcy5)		3204796	3296546
heg1	101480596	heart development protein with EGF-like domains 1(heg1)		22658862	22671599
fastkd5	101480599	FAST kinase domains 5(fastkd5)		16407025	16414491
rgcc	101480666	regulator of cell cycle(rgcc)		8085355	8091077
LOC101480680	101480680	ankyrin repeat domain 10b(ankrd10b)		14063173	14077282
ankzf1	101480697	ankyrin repeat and zinc finger peptidyl tRNA hydrolase 1(ankzf1)		19499889	19504554
tbx15	101480765	T-box transcription factor 15(tbx15)		4380068	4413526
hat1	101480795	histone acetyltransferase 1(hat1)		17943694	17961073
slc12a8	101480889	solute carrier family 12 member 8(slc12a8)		22673117	22693460
LOC101480890	101480890	olfactory receptor 5F1-like(LOC101480890)		24302650	24304636
dgkh	101480955	diacylglycerol kinase, eta(dgkh)		8207692	8306160
LOC101480967	101480967	ubiquitin conjugating enzyme E2 A, like(ube2al)		14077829	14083816
commd6	101481024	COMM domain containing 6(commd6)		11559591	11562313
hacd2	101481030	3-hydroxyacyl-CoA dehydratase 2(hacd2)		3303889	3315741
wdr3	101481037	WD repeat domain 3(wdr3)		4240160	4254177
dlx1	101481075	distal-less homeobox 1a(dlx1a)		17917051	17919044
LOC101481076	101481076	SLIT and NTRK-like family, member 5b(slitrk5b)		16376966	16382095
LOC101481174	101481174	galactosidase, beta 1-like(glb1l)		19504384	19510692
stam2	101481332	signal transducing adaptor molecule (SH3 domain and ITAM motif) 2(stam2)		3317767	3332673
znf148	101481369	zinc finger protein 148(znf148)		22694634	22705292
dlx2	101481377	distal-less homeobox 2a(dlx2a)		17909750	17912238
LOC101481378	101481378	protocadherin-17(LOC101481378)		16340545	16353553
ing1	101481449	inhibitor of growth family, member 1(ing1)		14084377	14088411
lmo7	101481509	LIM domain 7a(lmo7a)		11572366	11621045
gdap2	101481529	ganglioside induced differentiation associated protein 2(gdap2)		4220100	4239037
LOC101481640	101481640	SRY-box transcription factor 1a(sox1a)		12797023	12809650
LOC101481659	101481659	low choriolytic enzyme(LOC101481659)		19493346	19495483
itga6	101481670	integrin, alpha 6a(itga6a)		17878377	17896285
LOC101481671	101481671	protocadherin 8(pcdh8)		16318006	16321690
cacnb4	101481806	calcium channel, voltage-dependent, beta 4a subunit(cacnb4a)		3337730	3370922
LOC101481846	101481846	dehydrogenase/reductase SDR family member on chromosome X(LOC101481846)		22706135	22765191
LOC101481956	101481956	protocadherin-8(si:ch211-199f5.1)		16284567	16288437
aff3	101482124	AF4/FMR2 family, member 3(aff3)		12931716	12949773
rab20	101482125	RAB20, member RAS oncogene family(rab20)		14135884	14143481
uchl3	101482195	ubiquitin carboxyl-terminal esterase L3 (ubiquitin thiolesterase)(uchl3)		11564968	11571275
akap11	101482225	A kinase (PRKA) anchor protein 11(akap11)		8308414	8333039
LOC101482241	101482241	high choriolytic enzyme 2-like(LOC101482241)		19490576	19492442
LOC101482248	101482248	midline 1(mid1)		16207077	16233639
arl5a	101482287	ADP-ribosylation factor-like 5A(arl5a)		3371094	3380819
asmt	101482331	acetylserotonin O-methyltransferase(asmt)		22820370	22834086
LOC101482336	101482336	bromodomain adjacent to zinc finger domain protein 2B(LOC101482336)		19079240	19131369
nup62	101482337	nucleoporin 62 like(nup62l)		17870765	17873078
mitd1	101482421	MIT, microtubule interacting and transport, domain containing 1(mitd1)		12972486	12975772
col4a1	101482422	collagen, type IV, alpha 1(col4a1)		14205978	14253755
kctd12	101482491	potassium channel tetramerisation domain containing 12.1(kctd12.1)		11649245	11650881
tra2b	101482535	transformer 2 beta homolog(tra2b)		19481443	19488450
tbc1d8	101482581	TBC1 domain family member 8(tbc1d8)		3449486	3469756
akap17a	101482618	A kinase (PRKA) anchor protein 17A(akap17a)		22836790	22843821
cd302	101482625	CD302 molecule(cd302)		19069243	19073705
pdk1	101482626	pyruvate dehydrogenase kinase, isozyme 1(pdk1)		17864210	17870187
mrpl30	101482704	mitochondrial ribosomal protein L30(mrpl30)		12969174	12972251
irs2	101482705	insulin receptor substrate 2b(irs2b)		14282856	14295598
LOC101482774	101482774	uncharacterized LOC101482774(zgc:162944)		11657072	11662668
tent5c	101482794	terminal nucleotidyltransferase 5C(tent5c)		4775245	4781872
pdcl3	101482874	phosducin-like 3(pdcl3)		3473603	3478907
tnfsf11	101482899	TNF superfamily member 11(tnfsf11)		8357852	8366710
LOC101482932	101482932	protein phosphatase 1 regulatory subunit 9A-like A(ppp1r9ala)		17835748	17863666
LOC101482959	101482959	trace amine-associated receptor 13c-like(LOC101482959)		6848511	6849714
txndc9	101483005	thioredoxin domain containing 9(txndc9)		12965278	12968039
myo16	101483006	myosin XVI(myo16)		14323107	14435384
acod1	101483061	aconitate decarboxylase 1(acod1)		11654466	11656969
rbms1	101483106	RNA binding motif single stranded interacting protein 1(rbms1)		19046356	19064484
lonrf2	101483157	LON peptidase N-terminal domain and ring finger 2(lonrf2)		3535624	3550442
igf2bp2	101483212	insulin-like growth factor 2 mRNA binding protein 2a(igf2bp2a)		19417006	19476552
kiaa1211l	101483289	CRACD like(cracdl)		12978400	12985938
sowahc	101483297	sosondowah ankyrin repeat domain family Ca(sowahca)		22847075	22852074
cog3	101483301	component of oligomeric golgi complex 3(cog3)		16236193	16251853
cln5	101483334	CLN5 intracellular trafficking protein(cln5)		11662992	11667311
epsti1	101483351	epithelial stromal interaction 1(epsti1)		8430643	8450882
LOC101483446	101483446	mitogen-activated protein kinase kinase kinase kinase 4(LOC101483446)		3556096	3664448
man1a2	101483462	mannosidase, alpha, class 1A, member 2(man1a2)		4807360	4965452
tnfsf13b	101483561	TNF superfamily member 13b(tnfsf13b)		14447661	14450664
2022-09-10	101483577	septin 10(sept10)		22853554	22863778
LOC101483582	101483582	Rap guanine nucleotide exchange factor 4a(rapgef4a)		17790400	17826541
LOC101483583	101483583	rho GTPase-activating protein 6(LOC101483583)		16179015	16198552
fbxl3	101483631	F-box and leucine-rich repeat protein 3a(fbxl3a)		11667476	11675442
ildr1	101483672	immunoglobulin-like domain containing receptor 1b(ildr1b)		12990389	13004771
tank	101483796	TRAF family member-associated NFKB activator(tank)		19031168	19036045
LOC101483863	101483863	uncharacterized LOC101483863(LOC101483863)		8451257	8452878
abhd13	101483870	abhydrolase domain containing 13(abhd13)		14451086	14456597
ildr2	101483959	immunoglobulin-like domain containing receptor 2(ildr2)		13012224	13032997
sh3rf3	101484065	SH3 domain containing ring finger 3(sh3rf3)		22866555	22984136
mycbp2	101484105	MYC binding protein 2(mycbp2)		11676800	11742244
idh1	101484123	isocitrate dehydrogenase (NADP(+)) 1(idh1)		8476038	8488379
fam155a	101484129	family with sequence similarity 155 member A(fam155a)		14494937	14604280
tbr1	101484261	T-box brain transcription factor 1b(tbr1b)		19012692	19016856
LOC101484368	101484368	olfactory receptor 11A1-like(LOC101484368)		5727515	5728441
LOC101484406	101484406	cholecystokinin receptor(LOC101484406)		14640579	14666176
ehhadh	101484421	enoyl-CoA, hydratase/3-hydroxyacyl CoA dehydrogenase(ehhadh)		19395157	19405507
map3k20	101484425	sterile alpha motif and leucine zipper containing kinase AZK(zak)		17753428	17786742
LOC101484472	101484472	interleukin-1 receptor type 2(LOC101484472)		3668961	3675303
trim45	101484487	tripartite motif containing 45(trim45)		4991394	5013592
slc4a10	101484528	solute carrier family 4 member 10b(slc4a10b)		18977550	19008992
pou2f1	101484587	POU class 2 homeobox 1b(pou2f1b)		13048709	13067427
LOC101484640	101484640	olfactory receptor 6N2-like(LOC101484640)		5700216	5701136
vwa8	101484679	von Willebrand factor A domain containing 8(vwa8)		8115947	8204638
pdzk1	101484688	PDZ domain containing 1(pdzk1)		14674140	14678935
tmem41a	101484703	transmembrane protein 41aa(tmem41aa)		19405904	19412590
edar	101484704	ectodysplasin A receptor(edar)		22992547	23027025
cdca7	101484710	cell division cycle associated 7a(cdca7a)		17748946	17752670
frmpd4	101484711	FERM and PDZ domain containing 4(frmpd4)		16138636	16172251
gcg	101484809	glucagon b(gcgb)		18973265	18974979
LOC101484869	101484869	T-cell surface glycoprotein CD3 zeta chain(LOC101484869)		13070689	13080258
LOC101484879	101484879	gamma-crystallin M3(LOC101484879)		8981925	8982729
LOC101484928	101484928	olfactory receptor 2T11-like(LOC101484928)		5686969	5687895
LOC101484967	101484967	kelch-like protein 9(si:rp71-68n21.9)		4519324	4530897
LOC101484979	101484979	Golgi pH regulator(si:ch73-390b10.2)		14680543	14687768
lg16h3orf70	101484994	UPF0524 protein C3orf70 homolog B(zgc:162707)		19377925	19394312
ccdc138	101484995	coiled-coil domain containing 138(ccdc138)		23033191	23051621
sp3	101484998	sp3a transcription factor(sp3a)		17699791	17711077
LOC101485053	101485053	CD209 antigen-like protein C(LOC101485053)		5027737	5034400
LOC101485063	101485063	lysosomal associated membrane protein 1b(lamp1b)		13087996	13095333
LOC101485094	101485094	fibroblast activation protein, alpha(fap)		18963557	18972724
LOC101485228	101485228	olfactory receptor 51E1-like(LOC101485228)		5676762	5677745
ubxn4	101485246	UBX domain protein 4(ubxn4)		1883715	1908328
LOC101485259	101485259	protein kinase, AMP-activated, gamma 3b non-catalytic subunit(prkag3b)		1093732	1105917
hao2	101485264	hydroxyacid oxidase 2 (long chain)(hao2)		4509158	4518882
LOC101485274	101485274	uncharacterized LOC101485274(zgc:113337)		14688203	14705118
smarcal1	101485290	SWI/SNF related, matrix associated, actin dependent regulator of chromatin, subfamily a-like 1(smarcal1)		19283609	19295301
ola1	101485291	Obg like ATPase 1(ola1)		17645764	17692475
LOC101485345	101485345	MAGUK p55 subfamily member 4(LOC101485345)		5039793	5062890
ttll4	101485525	tubulin tyrosine ligase-like family, member 4(ttll4)		1066591	1086412
LOC101485538	101485538	DCN1, defective in cullin neddylation 1, domain containing 2a(dcun1d2a)		13103514	13109328
LOC101485556	101485556	NME/NM23 family member 9(nme9)		19291340	19308641
LOC101485650	101485650	potassium voltage-gated channel subfamily H member 7(LOC101485650)		18906386	18948505
egfl6	101485651	EGF-like-domain, multiple 6(egfl6)		16104619	16115531
LOC101485719	101485719	hydroxy-delta-5-steroid dehydrogenase, 3 beta- and steroid delta-isomerase 1(hsd3b1)		4533712	4537613
sp9	101485753	sp9 transcription factor(sp9)		17635670	17642497
LOC101485784	101485784	olfactory receptor 13C2-like(LOC101485784)		5647727	5648728
vtcn1	101485807	V-set domain containing T cell activation inhibitor 1(vtcn1)		5019789	5022603
LOC101485898	101485898	B- and T-lymphocyte attenuator(LOC101485898)		14715478	14720220
fign	101485922	fidgetin(fign)		18829732	18858553
pla1a	101486002	phospholipase A1 member A(pla1a)		4538182	4555535
vgll3	101486035	vestigial-like family member 3(vgll3)		23073353	23076428
cir1	101486040	corepressor interacting with RBPJ, CIR1(cir1)		17632064	17638189
LOC101486101	101486101	olfactory receptor 52D1-like(LOC101486101)		5068368	5069297
cd200r1	101486210	CD200 receptor 1(si:ch211-214p13.9)		14731091	14735877
LOC101486225	101486225	membrane associated ring-CH-type finger 4(marchf4)		19265569	19277043
grb14	101486232	growth factor receptor-bound protein 14(grb14)		18770544	18791407
gpr155	101486338	G protein-coupled receptor 155(gpr155)		17604072	17619017
LOC101486377	101486377	hemopexin a(hpxa)		2461280	2465804
LOC101486392	101486392	olfactory receptor 6N2-like(LOC101486392)		5088988	5089947
LOC101486405	101486405	growth hormone-regulated TBC protein 1-A(LOC101486405)		13097906	13103427
LOC101486497	101486497	popeye domain containing 2(popdc2)		4557786	4570338
LOC101486517	101486517	tumor necrosis factor receptor superfamily member 5(LOC101486517)		19244789	19250318
chmp2b	101486518	charged multivesicular body protein 2Ba(chmp2ba)		23089277	23098223
rab9a	101486526	RAB9A, member RAS oncogene family(rab9a)		16101521	16103909
scrn3	101486625	secernin 3(scrn3)		17627698	17630839
eaf2	101486665	ELL associated factor 2(eaf2)		2744486	2751590
LOC101486683	101486683	olfactory receptor 6N2-like(LOC101486683)		5108271	5109191
tfdp1	101486697	transcription factor Dp-1, a(tfdp1a)		13112622	13122141
LOC101486766	101486766	uncharacterized LOC101486766(si:ch211-67e16.11)		1032329	1061849
xrcc5	101486802	X-ray repair complementing defective repair in Chinese hamster cells 5(xrcc5)		19207733	19221397
pou1f1	101486803	POU class 1 homeobox 1(pou1f1)		23100792	23109566
trappc2	101486810	trafficking protein particle complex subunit 2(trappc2)		16099551	16101323
scel	101486846	sciellin(scel)		11746675	11755591
cobll1	101486900	cordon-bleu WH2 repeat protein-like 1b(cobll1b)		18745845	18767735
LOC101486932	101486932	olfactory receptor 2M3-like(LOC101486932)		5612304	5613251
neb	101486946	nebulin(neb)		3387765	3449380
LOC101486966	101486966	olfactory receptor 6N2-like(LOC101486966)		5120024	5126293
kalrn	101487055	kalirin RhoGEF kinase a(kalrna)		861671	1009171
LOC101487087	101487087	transmembrane protein 169(LOC101487087)		19202128	19204926
htr1f	101487088	5-hydroxytryptamine (serotonin) receptor 1Fa(htr1fa)		23154512	23179894
gpm6b	101487095	glycoprotein M6Bb(gpm6bb)		16061052	16090247
LOC101487158	101487158	cytochrome c oxidase copper chaperone(LOC101487158)		4571844	4573823
rif1	101487236	replication timing regulatory factor 1(rif1)		8518991	8540713
LOC101487245	101487245	olfactory receptor 13C2-like(LOC101487245)		5138398	5139348
chrna1	101487286	cholinergic receptor nicotinic alpha 1 subunit(chrna1)		17591556	17600643
slain1	101487323	SLAIN motif family, member 1a(slain1a)		11757284	11770247
nr1i2	101487359	nuclear receptor subfamily 1, group I, member 2(nr1i2)		14749518	14759539
pfkl	101487378	phosphofructokinase, liver a(pfkla)		20327652	20340884
lg16h3orf38	101487379	linkage group 16 C3orf38 homolog(lg16h3orf38)		23208663	23212334
mospd2	101487387	motile sperm domain containing 2(mospd2)		16002223	16018455
LOC101487454	101487454	hyperpolarization activated cyclic nucleotide-gated potassium channel 5(hcn5)		4577388	4585411
LOC101487510	101487510	olfactory receptor 11A1-like(LOC101487510)		5552090	5553016
LOC101487552	101487552	methyltransferase 21C, AARS1 lysine b(mettl21cb)		13128101	13130681
LOC101487572	101487572	chimerin 1(chn1)		17573891	17587032
maats1	101487643	cilia and flagella associated protein 91(cfap91)		14738308	14748654
LOC101487659	101487659	protein starmaker-like(LOC101487659)		20322343	20327553
LOC101487660	101487660	uncharacterized LOC101487660(zgc:152951)		23199621	23208223
fancb	101487672	FA complementation group B(fancb)		16018600	16036304
LOC101487738	101487738	aryl hydrocarbon receptor(LOC101487738)		774737	843634
LOC101487746	101487746	uncharacterized LOC101487746(LOC101487746)		4585430	4591313
LOC101487796	101487796	olfactory receptor 1500-like(LOC101487796)		5529704	5530645
LOC101487838	101487838	rhodopsin kinase(LOC101487838)		13123471	13127762
LOC101487859	101487859	ATP synthase membrane subunit c locus 3a(atp5mc3a)		17531793	17534375
LOC101487899	101487899	kelch repeat and BTB (POZ) domain containing 7(kbtbd7)		11773802	11777878
tnfaip6	101487907	tumor necrosis factor, alpha-induced protein 6(tnfaip6)		8545283	8553086
gsk3b	101487930	glycogen synthase kinase 3 beta, genome duplicate a(gsk3ba)		14762888	14798273
glra2	101487958	glycine receptor, alpha 2(glra2)		16033977	16044984
ska3	101488017	spindle and kinetochore associated complex subunit 3(ska3)		4591387	4601141
LOC101488068	101488068	olfactory receptor 2AT4-like(LOC101488068)		5486992	5487903
LOC101488072	101488072	neurotrimin(ntm)		20676946	21144416
LOC101488094	101488094	olfactory receptor 13C2-like(LOC101488094)		5158555	5159487
LOC101488112	101488112	probable serine/threonine-protein kinase kinX(si:ch211-160b11.4)		13138880	13141906
slc38a11	101488133	solute carrier family 38 member 11(slc38a11)		18684510	18688601
fam237a	105941051	family with sequence similarity 237 member A(fam237a)		17073824	17080064
LOC105941054	105941054	uncharacterized LOC105941054(LOC105941054)		19131875	19134401
LOC105941055	105941055	uncharacterized LOC105941055(LOC105941055)		18544416	18575010
LOC105941056	105941056	uncharacterized LOC105941056(LOC105941056)		15951246	15952464
LOC105941057	105941057	uncharacterized LOC105941057(LOC105941057)		15818701	15821788
LOC105941296	105941296	uncharacterized LOC105941296(wu:fc50b12)		11770574	11772142
LOC105941334	105941334	uncharacterized LOC105941334(LOC105941334)		1976647	1977158
LOC105941455	105941455	olfactory receptor 6N2-like(LOC105941455)		5149646	5150545
LOC105941456	105941456	olfactory receptor 6N2-like(LOC105941456)		5221147	5222058
LOC105941457	105941457	olfactory receptor 6N2-like(LOC105941457)		5334814	5335731
LOC106674481	106674481	cystathionine beta-synthase(LOC106674481)		13951894	13963131
LOC106674595	106674595	uncharacterized LOC106674595(LOC106674595)		1913572	1918186
LOC106674623	106674623	uncharacterized LOC106674623(LOC106674623)		189872	192091
LOC106674870	106674870	olfactory receptor 142-like(LOC106674870)		24315701	24316716
LOC106674871	106674871	olfactory receptor 11A1-like(LOC106674871)		24313501	24314442
LOC106674872	106674872	olfactory receptor 49-like(LOC106674872)		24291798	24292739
LOC106674879	106674879	tubulin alpha chain(LOC106674879)		21558115	21561300
LOC106675103	106675103	immunoglobulin superfamily member 2(LOC106675103)		15811322	15818549
LOC106675110	106675110	uncharacterized LOC106675110(LOC106675110)		16190175	16232251
LOC106675113	106675113	toll-like receptor 8(LOC106675113)		16133283	16136290
LOC106675409	106675409	olfactory receptor 6N2-like(LOC106675409)		5398316	5399239
LOC106675445	106675445	uncharacterized LOC106675445(LOC106675445)		1967947	1968642
LOC106675481	106675481	uncharacterized LOC106675481(LOC106675481)		13900410	13915514
LOC106675483	106675483	uncharacterized LOC106675483(LOC106675483)		13405481	13406197
LOC106675500	106675500	uncharacterized protein K02A2.6-like(LOC106675500)		5642677	5645514
LOC106675505	106675505	uncharacterized LOC106675505(LOC106675505)		6317794	6318433
LOC106675506	106675506	uncharacterized LOC106675506(LOC106675506)		6875607	6875980
LOC106675570	106675570	sulfide:quinone oxidoreductase, mitochondrial pseudogene(LOC106675570)		8939966	8941527
LOC106675571	106675571	gamma-crystallin M3-like(LOC106675571)		8998785	8999616
LOC106675603	106675603	solute carrier family 22 member 4(LOC106675603)		10127065	10147884
LOC106675605	106675605	zinc finger MYM-type protein 1-like(LOC106675605)		9971351	9974024
LOC106675812	106675812	olfactory receptor 13C2-like(LOC106675812)		5348133	5349062
LOC106675814	106675814	olfactory receptor 6N2-like(LOC106675814)		5079372	5085691
LOC106675816	106675816	uncharacterized LOC106675816(LOC106675816)		5186389	5187451
LOC106675994	106675994	CD209 antigen-like protein C(LOC106675994)		10043964	10062701
LOC106676152	106676152	ATP-dependent (S)-NAD(P)H-hydrate dehydratase(LOC106676152)		14088748	14129317
LOC106676233	106676233	sacsin-like(LOC106676233)		20578862	20588113
LOC106676252	106676252	uncharacterized LOC106676252(LOC106676252)		7550381	7552819
LOC106676602	106676602	zinc finger BED domain-containing protein 1-like(LOC106676602)		2393083	2397239
LOC106676927	106676927	serine/threonine-protein kinase pim-1(LOC106676927)		24835050	24838343
LOC106676929	106676929	serine/threonine-protein kinase pim-1(LOC106676929)		24842931	24848329
LOC106676930	106676930	olfactory receptor 142-like(LOC106676930)		24420426	24421493
LOC111500590	111500590	U2 spliceosomal RNA(LOC111500590)		20412664	20412854
trnar-acg	111500591	transfer RNA arginine (anticodon ACG)(trnar-acg)		21369459	21369531
trnak-uuu	111500592	transfer RNA lysine (anticodon UUU)(trnak-uuu)		19495517	19495589
LOC111500698	111500698	uncharacterized LOC111500698(LOC111500698)		16413413	16417103
trnal-cag	111500700	transfer RNA leucine (anticodon CAG)(trnal-cag)		15631539	15631621
trnas-cga	111500701	transfer RNA serine (anticodon CGA)(trnas-cga)		17571722	17571803
LOC111500887	111500887	trace amine-associated receptor 13c-like(LOC111500887)		6790188	6791391
LOC111500897	111500897	5S ribosomal RNA(LOC111500897)		2566116	2566234
LOC111500898	111500898	5S ribosomal RNA(LOC111500898)		2562548	2562666
LOC111500899	111500899	5S ribosomal RNA(LOC111500899)		2560437	2560555
trnal-caa	111500900	transfer RNA leucine (anticodon CAA)(trnal-caa)		2568080	2568188
trnal-caa	111500901	transfer RNA leucine (anticodon CAA)(trnal-caa)		2565595	2565704
LOC111500917	111500917	uncharacterized LOC111500917(LOC111500917)		12621213	12627794
LOC111500919	111500919	small nucleolar RNA SNORA23(LOC111500919)		13623771	13623951
LOC111500947	111500947	trace amine-associated receptor 13c-like(LOC111500947)		6839988	6841394
LOC111500948	111500948	trace amine-associated receptor 13c-like(LOC111500948)		6823144	6825220
trnae-cuc	111500996	transfer RNA glutamic acid (anticodon CUC)(trnae-cuc)		10416298	10416369
trnag-ucc	111500997	transfer RNA glycine (anticodon UCC)(trnag-ucc)		10248915	10248986
trnag-ucc	111500998	transfer RNA glycine (anticodon UCC)(trnag-ucc)		10247182	10247253
LOC111500999	111500999	uncharacterized LOC111500999(LOC111500999)		7900130	7919392
LOC111501205	111501205	trichohyalin(LOC111501205)		1469992	1491617
LOC111501206	111501206	triadin-like(LOC111501206)		1359569	1363455
LOC111501207	111501207	titin(LOC111501207)		1352468	1356133
LOC111501208	111501208	caldesmon-like(LOC111501208)		1365225	1367960
LOC111501209	111501209	titin-like(LOC111501209)		1440725	1442859
LOC111501400	111501400	U6 spliceosomal RNA(LOC111501400)		7131746	7131847
lg16h13orf42	111501484	linkage group 16 C13orf42 homolog(lg16h13orf42)		12574847	12577453
LOC112429732	112429732	G-protein coupled receptor 161-like(LOC112429732)		13707230	13714508
LOC112430068	112430068	ATP-dependent (S)-NAD(P)H-hydrate dehydratase-like(LOC112430068)		14129587	14135834
LOC112430070	112430070	interleukin-1 receptor type 2-like(LOC112430070)		3685919	3694475
LOC112430071	112430071	transmembrane protein 169-like(LOC112430071)		20315672	20317430
LOC112430072	112430072	ganglioside-induced differentiation-associated protein 2-like(LOC112430072)		4737138	4744646
LOC112430073	112430073	uncharacterized LOC112430073(LOC112430073)		7276188	7278876
LOC112430075	112430075	uncharacterized LOC112430075(LOC112430075)		21151676	21154965
LOC112436085	112436085	insulin-induced gene 2 protein-like(LOC112436085)		1849655	1857178
LOC112436086	112436086	uncharacterized LOC112436086(LOC112436086)		5436825	5441211
LOC112436087	112436087	uncharacterized LOC112436087(LOC112436087)		14982272	14988231
LOC112436088	112436088	olfactory receptor-like protein COR2(LOC112436088)		5658770	5659869
LOC112436090	112436090	uncharacterized LOC112436090(LOC112436090)		3508176	3514735
LOC112436091	112436091	ribonuclease H-like(LOC112436091)		6502282	6502848
LOC112436092	112436092	uncharacterized LOC112436092(LOC112436092)		8264958	8279442
LOC112436093	112436093	trace amine-associated receptor 13c-like(LOC112436093)		6810170	6811265
LOC112436094	112436094	5-hydroxytryptamine receptor 2A-like(LOC112436094)		6884049	6912381
LOC112436095	112436095	uncharacterized LOC112436095(LOC112436095)		6943777	6946325
LOC112436096	112436096	trace amine-associated receptor 13c-like(LOC112436096)		6982146	6983258
LOC112436097	112436097	amine oxidase [flavin-containing]-like(LOC112436097)		7599202	7625349
LOC112436098	112436098	amine oxidase [flavin-containing]-like(LOC112436098)		7685767	7749957
LOC112436099	112436099	amine oxidase [flavin-containing]-like(LOC112436099)		7648646	7662443
gpr82	112436100	G protein-coupled receptor 82(gpr82)		7409563	7413278
LOC112436101	112436101	uncharacterized LOC112436101(LOC112436101)		21155039	21156124
LOC112436102	112436102	uncharacterized LOC112436102(LOC112436102)		19196862	19197254
LOC112436103	112436103	uncharacterized LOC112436103(LOC112436103)		21897886	21898936
LOC112436104	112436104	uncharacterized LOC112436104(LOC112436104)		22397467	22400884
LOC112436105	112436105	uncharacterized LOC112436105(LOC112436105)		6341399	6341772
LOC112436106	112436106	toll-like receptor 8(LOC112436106)		16136320	16137065
LOC112436107	112436107	uncharacterized LOC112436107(LOC112436107)		9961514	9962425
LOC112436108	112436108	uncharacterized LOC112436108(LOC112436108)		15041518	15044184
LOC112436109	112436109	uncharacterized LOC112436109(LOC112436109)		15044266	15046707
LOC112436112	112436112	zinc finger BED domain-containing protein 4-like(LOC112436112)		22583283	22584713
LOC112436113	112436113	trace amine-associated receptor 13c-like(LOC112436113)		6972417	6973592
LOC112436114	112436114	trace amine-associated receptor 13c-like(LOC112436114)		6935755	6936885
LOC112436117	112436117	uncharacterized LOC112436117(LOC112436117)		10029107	10031053
LOC112436118	112436118	nectin-2-like(LOC112436118)		14979475	14982271
LOC112436119	112436119	integral membrane protein GPR155-like(LOC112436119)		17622602	17626662
LOC112436120	112436120	collagen alpha-2(VI) chain-like(LOC112436120)		20294084	20295254
LOC112436121	112436121	sacsin-like(LOC112436121)		20573866	20578730
LOC112436122	112436122	sacsin-like(LOC112436122)		21195925	21198953
LOC112436123	112436123	uncharacterized LOC112436123(LOC112436123)		21750450	21765684
LOC112436125	112436125	olfactory receptor 6N2-like(LOC112436125)		24329111	24329985
LOC112436126	112436126	olfactory receptor 142-like(LOC112436126)		24333056	24333985
LOC112436127	112436127	olfactory receptor 6F1-like(LOC112436127)		24338518	24339563
LOC112436128	112436128	olfactory receptor 10Z1-like(LOC112436128)		24344217	24345146
LOC112436129	112436129	olfactory receptor 63-like(LOC112436129)		24352052	24353531
LOC112436130	112436130	olfactory receptor 10Z1-like(LOC112436130)		24358154	24359244
LOC112436131	112436131	putative gustatory receptor clone PTE01(LOC112436131)		24372992	24374059
LOC112436133	112436133	olfactory receptor 142-like(LOC112436133)		24380086	24381191
LOC112436134	112436134	olfactory receptor 6F1-like(LOC112436134)		24389951	24390880
LOC112436135	112436135	olfactory receptor 10Z1-like(LOC112436135)		24398267	24399246
LOC112436136	112436136	olfactory receptor 10Z1-like(LOC112436136)		24412156	24415739
LOC112436137	112436137	olfactory receptor 142-like(LOC112436137)		24449274	24450439
LOC112436138	112436138	olfactory receptor 10Z1-like(LOC112436138)		24465040	24470158
LOC112436139	112436139	olfactory receptor 6F1-like(LOC112436139)		24516995	24521713
LOC112436140	112436140	olfactory receptor 10Z1-like(LOC112436140)		24524521	24525450
LOC112436142	112436142	olfactory receptor 6F1-like(LOC112436142)		24528626	24529693
LOC112436154	112436154	sacsin-like(si:dkeyp-118h9.7)		21187187	21196003
LOC112436155	112436155	uncharacterized LOC112436155(LOC112436155)		778976	780608
LOC112436156	112436156	uncharacterized LOC112436156(LOC112436156)		9952404	9954750
LOC112436157	112436157	uncharacterized LOC112436157(LOC112436157)		5345733	5346106
LOC112436158	112436158	uncharacterized LOC112436158(LOC112436158)		20886458	20887461
LOC112436161	112436161	uncharacterized LOC112436161(LOC112436161)		9919793	9920292
LOC112436162	112436162	transmembrane protein 30C(tmem30c)		12135433	12139712
cmss1	112436164	cms1 ribosomal small subunit homolog(cmss1)		12139806	12171779
LOC112436167	112436167	gamma-crystallin M3-like(LOC112436167)		9027554	9028385
LOC112436169	112436169	uncharacterized LOC112436169(LOC112436169)		19229632	19230280
LOC112436170	112436170	ornithine carbamoyltransferase, mitochondrial-like(LOC112436170)		13695758	13701255
LOC112436171	112436171	uncharacterized LOC112436171(LOC112436171)		13702827	13703643
LOC112436177	112436177	X-ray repair cross-complementing protein 5-like(LOC112436177)		20298303	20312690
LOC112436184	112436184	interleukin-1 receptor-like 2(LOC112436184)		3695575	3723945
LOC112436185	112436185	interleukin-1 receptor type 2-like(LOC112436185)		3728152	3740815
LOC112436190	112436190	G-protein coupled receptor 161-like(LOC112436190)		13687499	13694780
LOC112436191	112436191	trace amine-associated receptor 13c-like(LOC112436191)		6927428	6929175
LOC112436192	112436192	lambda-crystallin homolog(LOC112436192)		4205672	4212398
LOC112436193	112436193	histone H1-like(LOC112436193)		20601675	20602728
LOC112436195	112436195	sacsin-like(LOC112436195)		20568677	20573003
LOC112436196	112436196	histone H1-like(LOC112436196)		5506067	5506944
LOC112436197	112436197	uncharacterized LOC112436197(LOC112436197)		14877796	14881113
LOC112436199	112436199	THAP domain-containing protein 5-like(LOC112436199)		7273587	7274714
LOC112436201	112436201	uncharacterized LOC112436201(LOC112436201)		6942863	6943754
LOC112436203	112436203	uncharacterized LOC112436203(LOC112436203)		8926111	8926860
LOC112436204	112436204	uncharacterized protein K02A2.6-like(LOC112436204)		2323030	2326961
LOC112436205	112436205	ornithine transcarbamylase(otc)		13715346	13721070
cryl1	112436206	crystallin, lambda 1(cryl1)		4724154	4736805
LOC112436208	112436208	uncharacterized LOC112436208(LOC112436208)		21157832	21159486

## Sheet: Mouth Angle LG13 NC_036792.1
NC_036792.1:10191934-18278438
NCBI Gene symbol	NCBI Gene ID	DAVID Gene Name	Chromosome #	START	STOP
LOC101463633	101463633	Fas cell surface death receptor(fas)	13	13711199	13716591
LOC101463634	101463634	paired box 2a(pax2a)	13	15362350	15395423
LOC101463635	101463635	protein FAM13A(LOC101463635)	13	11971468	11990465
ecd	101463727	ecdysoneless homolog (Drosophila)(ecd)	13	11525567	11531376
nkx2-3	101463745	NK2 homeobox 3(nkx2.3)	13	16783003	16785480
LOC101463924	101463924	deleted in malignant brain tumors 1 protein(LOC101463924)	13	12341040	12348669
got1	101464046	glutamic-oxaloacetic transaminase 1, soluble(got1)	13	16794501	16799580
p4ha1	101464219	prolyl 4-hydroxylase, alpha polypeptide I b(p4ha1b)	13	11543388	11555757
nkx1-2	101464221	NK1 transcription factor related 2-like,a(nkx1.2la)	13	12534174	12536231
LOC101464312	101464312	phosphatase and tensin homolog A(ptena)	13	13758891	13770159
cnnm1	101464335	cyclin and CBS domain divalent metal cation transport mediator 1(cnnm1)	13	16799669	16815481
LOC101464500	101464500	actinin, alpha 2b(actn2b)	13	11555857	11573969
LOC101464502	101464502	autophagy-related protein 16-1(si:ch1073-143l10.2)	13	12735676	12738974
LOC101464516	101464516	adaptor related protein complex 3 subunit mu 1(ap3m1)	13	18055168	18071909
hpse2	101464618	heparanase 2(hpse2)	13	16819846	16871255
LOC101464786	101464786	uncharacterized LOC101464786(LOC101464786)	13	11574445	11575512
LOC101464788	101464788	VPS10 domain-containing receptor SorCS1(LOC101464788)	13	13308169	13357350
hps1	101464902	HPS1 biogenesis of lysosomal organelles complex 3 subunit 1(hps1)	13	16877388	16885171
LOC101464984	101464984	bifunctional 3'-phosphoadenosine 5'-phosphosulfate synthase 2(LOC101464984)	13	13773961	13790732
LOC101464997	101464997	adenosine kinase a(adka)	13	18071939	18083757
LOC101465081	101465081	ryanodine receptor 2b (cardiac)(ryr2b)	13	11588005	11662692
LOC101465082	101465082	collagen alpha-1(XVII) chain(LOC101465082)	13	13633901	13658145
cfap43	101465366	cilia and flagella associated protein 43(cfap43)	13	13663047	13679712
LOC101465548	101465548	cholinergic receptor, muscarinic 3a(chrm3a)	13	11689912	11772907
LOC101465565	101465565	ST3 beta-galactoside alpha-2,3-sialyltransferase 7(st3gal7)	13	16885370	16887908
LOC101465653	101465653	multiple inositol polyphosphate phosphatase 1(LOC101465653)	13	13794911	13807035
grem2	101465852	gremlin 2, DAN family BMP antagonist a(grem2a)	13	11816323	11823076
morn4	101465866	MORN repeat containing 4(morn4)	13	16892887	16898573
LOC101465958	101465958	multiple inositol polyphosphate phosphatase 1-like(LOC101465958)	13	13808806	13811110
LOC101465959	101465959	prokineticin receptor 1b(prokr1b)	13	14268682	14275339
LOC101466041	101466041	carbohydrate (chondroitin 6) sulfotransferase 3a(chst3a)	13	15497907	15505759
LOC101466055	101466055	dual specificity protein phosphatase 13-like(LOC101466055)	13	18093652	18094714
rgs7	101466142	regulator of G protein signaling 7a(rgs7a)	13	11824015	11878571
sgms1	101466244	sphingomyelin synthase 1(sgms1)	13	13812023	13835381
LOC101466246	101466246	GTP binding protein 2a(gtpbp2a)	13	14347879	14359207
LOC101466351	101466351	ligand-dependent corepressor(LOC101466351)	13	16902864	16928204
LOC101466352	101466352	dual specificity protein phosphatase family protein(zgc:153981)	13	18092104	18093601
LOC101466437	101466437	ubiquitin-conjugating enzyme E2 D4(LOC101466437)	13	11881380	11887988
LOC101466538	101466538	cGMP-dependent protein kinase 1(LOC101466538)	13	13852824	13953763
LOC101466539	101466539	cadherin-related family member 1a(cdhr1a)	13	15511580	15528079
LOC101466540	101466540	polymeric immunoglobulin receptor-like(LOC101466540)	13	14369471	14371789
LOC101466639	101466639	sphingomyelin synthase-related protein 1(LOC101466639)	13	18095721	18102645
bicc1	101466720	BicC family RNA binding protein 1(bicc1)	13	11889459	11949980
LOC101466810	101466810	polymeric immunoglobulin receptor-like(LOC101466810)	13	14386746	14401748
phyhipl	101466984	phytanoyl-CoA 2-hydroxylase interacting protein-like b(phyhiplb)	13	11955409	11969818
LOC101466985	101466985	dickkopf-related protein 1(LOC101466985)	13	13955559	13957480
LOC101466987	101466987	leucine-rich repeat, immunoglobulin-like and transmembrane domains 2(lrit2)	13	15535584	15540104
slit1	101467001	slit homolog 1a (Drosophila)(slit1a)	13	16929781	17016304
msmb	101467103	microseminoprotein beta(msmb)	13	18102914	18105034
LOC101467287	101467287	protocadherin-15(LOC101467287)	13	13993639	14219707
LOC101467390	101467390	neuropeptide Y receptor Y4(npy4r)	13	18105244	18122462
ccdc6	101467475	coiled-coil domain containing 6(ccdc6)	13	12001866	12021800
LOC101467692	101467692	leucine-rich repeat, immunoglobulin-like and transmembrane domains 1a(lrit1a)	13	15540449	15545249
slc16a9	101467775	solute carrier family 16 member 9(slc16a9)	13	11990807	11997900
LOC101467909	101467909	rho GTPase-activating protein 19(LOC101467909)	13	17021601	17028072
angpt2	101467910	angiopoietin 2a(angpt2a)	13	18140083	18154959
LOC101467999	101467999	retinal G protein coupled receptor a(rgra)	13	15546202	15555829
LOC101468212	101468212	canalicular multispecific organic anion transporter 1(LOC101468212)	13	17103850	17129340
mcph1	101468213	microcephalin 1(mcph1)	13	18124173	18165472
LOC101468296	101468296	ankyrin-3(LOC101468296)	13	12024301	12114862
LOC101468297	101468297	solute carrier family 18 member 3a(slc18a3a)	13	15563666	15566441
LOC101468502	101468502	copper homeostasis protein cutC homolog(LOC101468502)	13	17210669	17215582
agpat5	101468503	1-acylglycerol-3-phosphate O-acyltransferase 5 (lysophosphatidic acid acyltransferase, epsilon)(agpat5)	13	18167432	18179088
LOC101468574	101468574	choline O-acetyltransferase a(chata)	13	15566948	15577954
LOC101468575	101468575	myoferlin like(myofl)	13	15683749	15705662
plek	101468682	pleckstrin(plek)	13	14235832	14246361
ubac2	101468792	UBA domain containing 2(ubac2)	13	12173330	12182479
tmem14a	101468810	transmembrane protein 14A(tmem14a)	13	18183714	18185380
ffar4	101468877	free fatty acid receptor 4(ffar4)	13	15712640	15714275
lg13h10orf53	101469081	linkage group 13 C10orf53 homolog(lg13h10orf53)	13	15627341	15628341
LOC101469101	101469101	glutathione S-transferase, alpha tandem duplicate 1(gsta.1)	13	18185422	18187285
LOC101469184	101469184	redox-regulatory protein FAM213A-like(LOC101469184)	13	16047109	16049134
LOC101469196	101469196	Kv channel-interacting protein 2(LOC101469196)	13	17221470	17342918
LOC101469470	101469470	dachshund c(dachc)	13	12185652	12208141
ogdhl	101469737	oxoglutarate dehydrogenase L(ogdhl)	13	15629049	15646294
LOC101469751	101469751	glutathione S-transferase A2(LOC101469751)	13	18196562	18198519
bfsp1	101469932	beaded filament structural protein 1(bfsp1)	13	14286346	14297752
LOC101470230	101470230	cytochrome c oxidase assembly protein COX15 homolog(LOC101470230)	13	17215851	17221449
ick	101470231	ciliogenesis associated kinase 1(cilk1)	13	18200027	18210458
mzt1	101470310	mitotic spindle organizing protein 1(mzt1)	13	12215081	12220401
parg	101470410	poly (ADP-ribose) glycohydrolase a(parga)	13	15648163	15682224
dis3	101470510	DIS3 exosome endoribonuclease and 3'-5' exoribonuclease(dis3)	13	12224947	12232672
pcsk2	101470601	proprotein convertase subtilisin/kexin type 2(pcsk2)	13	14298926	14327885
hps6	101470725	HPS6 biogenesis of lysosomal organelles complex 2 subunit 3(hps6)	13	17431065	17435104
bora	101470810	bora aurora kinase A activator(bora)	13	12220463	12224844
otor	101470908	otoraplin(otor)	13	14343919	14345206
LOC101470910	101470910	centrosomal protein of 55 kDa(LOC101470910)	13	15699474	15711883
LOC101471011	101471011	LIM domain binding 1a(ldb1a)	13	17455172	17474476
pibf1	101471081	progesterone immunomodulatory binding factor 1(pibf1)	13	12232855	12252805
polh	101471183	polymerase (DNA directed), eta(polh)	13	14360633	14365476
fbxo9	101471292	F-box protein 9(fbxo9)	13	18211778	18220804
LOC101471378	101471378	Kruppel-like factor 5a(klf5a)	13	12254774	12262852
elovl5	101471581	ELOVL fatty acid elongase 5(elovl5)	13	18224506	18239271
pprc1	101471689	PPARG related coactivator 1(pprc1)	13	17479430	17489015
pgbd5	101471859	piggyBac transposable element derived 5(pgbd5)	13	12299117	12321911
cog2	101472128	component of oligomeric golgi complex 2(cog2)	13	12321999	12331724
oga	101472149	O-GlcNAcase(oga)	13	17491507	17502759
LOC101472336	101472336	histone-lysine N-methyltransferase SETDB1-B(LOC101472336)	13	14442192	14450464
gclc	101472352	glutamate-cysteine ligase, catalytic subunit(gclc)	13	18242687	18255129
agt	101472432	angiotensinogen(agt)	13	12333204	12337408
LOC101472641	101472641	voltage-dependent anion channel 2(vdac2)	13	14450442	14455369
LOC101472728	101472728	IKAROS family zinc finger 5(ikzf5)	13	12348868	12353704
LOC101472925	101472925	alpha-internexin-like(LOC101472925)	13	14456319	14459740
npm3	101473041	nucleophosmin/nucleoplasmin, 3(npm3)	13	17506140	17509419
LOC101473121	101473121	MAP/microtubule affinity-regulating kinase 1(mark1)	13	15726140	15763148
LOC101473229	101473229	H6 family homeobox 3a(hmx3a)	13	12374492	12377459
LOC101473231	101473231	catechol-O-methyltransferase domain containing 1(comtd1)	13	14461814	14465209
LOC101473342	101473342	E3 ubiquitin-protein ligase TRIM8(LOC101473342)	13	17518408	17532064
hmx2	101473517	H6 family homeobox 2(hmx2)	13	12382859	12384946
sufu	101473627	suppressor of fused homolog (Drosophila)(sufu)	13	17533178	17548179
lrrc1	101473628	leucine rich repeat containing 1(lrrc1)	13	18270709	18283354
znf503	101473704	zinc finger protein 503(znf503)	13	14530024	14533016
LOC101473811	101473811	G-protein coupled receptor 26-like(LOC101473811)	13	12480950	12484017
LOC101473814	101473814	leucine-rich glioma-inactivated protein 1(LOC101473814)	13	15719024	15725329
lrmda	101474007	leucine rich melanocyte differentiation associated(lrmda)	13	14539773	14750869
LOC101474113	101474113	carbohydrate sulfotransferase 15(LOC101474113)	13	12502264	12519182
efemp1	101474115	EGF containing fibulin extracellular matrix protein 1(efemp1)	13	15773104	15792318
zdhhc16	101474140	zinc finger DHHC-type palmitoyltransferase 16a(zdhhc16a)	13	17553580	17559111
LOC101474300	101474300	potassium large conductance calcium-activated channel, subfamily M, alpha member 1a(kcnma1a)	13	14763662	14911426
LOC101474576	101474576	protein FAM53B(LOC101474576)	13	12571915	12597651
LOC101474577	101474577	cystatin-SA(LOC101474577)	13	15808240	15809023
mettl18	101474593	methyltransferase like 18(mettl18)	13	17549783	17553330
abraxas2	101474855	abraxas 2, BRISC complex subunit(abraxas2)	13	12605642	12615835
xpo5	101474856	exportin 5(xpo5)	13	15817702	15834145
LOC101474868	101474868	ubiquitin domain containing 1a(ubtd1a)	13	17561627	17568667
LOC101475253	101475253	apoptosis-stimulating of p53 protein 2(LOC101475253)	13	15837503	15865507
eef1akmt2	101475343	EEF1A lysine methyltransferase 2(eef1akmt2)	13	12599617	12605641
rrp12	101475578	ribosomal RNA processing 12 homolog(rrp12)	13	17569685	17581033
LOC101475651	101475651	zinc finger, RAN-binding domain containing 1b(zranb1b)	13	12616548	12639555
LOC101475744	101475744	semaphorin-4G(LOC101475744)	13	15871855	15899464
LOC101475949	101475949	annexin A11a(anxa11a)	13	14958588	14979490
LOC101476048	101476048	ANTXR cell adhesion molecule 1d(antxr1d)	13	17582734	17604762
LOC101476325	101476325	C-terminal binding protein 2a(ctbp2a)	13	12640720	12722849
LOC101476335	101476335	PR domain containing 8(prdm8)	13	17606239	17609803
LOC101476427	101476427	v-akt murine thymoma viral oncogene homolog 3a(akt3a)	13	10153197	10208716
LOC101476430	101476430	leucine zipper, putative tumor suppressor 2a(lzts2a)	13	15923966	15968444
LOC101476634	101476634	growth differentiation factor 10a(gdf10a)	13	17612361	17616752
LOC101476718	101476718	uncharacterized LOC101476718(LOC101476718)	13	15969183	15986853
LOC101476908	101476908	Rho GTPase activating protein 22(arhgap22)	13	17689637	17701845
LOC101476995	101476995	selenoprotein U 1a(selenou1a)	13	16040777	16047049
tex36	101477175	testis expressed 36(tex36)	13	12734315	12735424
LOC101477275	101477275	sideroflexin 3(sfxn3)	13	16027171	16036883
zbtb18	101477366	zinc finger and BTB domain containing 18(zbtb18)	13	10236843	10247232
LOC101477466	101477466	DEAH (Asp-Glu-Ala-His) box polypeptide 32b(dhx32b)	13	12753473	12760568
LOC101477577	101477577	mitogen-activated protein kinase 8a(mapk8a)	13	17679242	17689535
edrf1	101477743	erythroid differentiation regulatory factor 1(edrf1)	13	12738428	12752828
LOC101477745	101477745	methionine adenosyltransferase I, alpha(mat1a)	13	16057301	16064937
LOC101478045	101478045	protein tyrosine phosphatase non-receptor type 20(ptpn20)	13	17652411	17679076
LOC101478205	101478205	adenylosuccinate synthase 2(adss2)	13	10272555	10299699
dlg5	101478207	discs, large homolog 5a (Drosophila)(dlg5a)	13	14914802	14954934
LOC101478395	101478395	finTRIM family, member 14-like(ftr14l)	13	16086833	16091204
LOC101478489	101478489	zinc finger protein 135(LOC101478489)	13	10303938	10307205
LOC101478677	101478677	ADAM metallopeptidase domain 12b(adam12b)	13	12763831	12851858
LOC101478678	101478678	Transmembrane protein 150A-like(zgc:154058)	13	16065000	16084939
slc29a1	101478767	solute carrier family 29 member 1 (Augustine blood group)(slc29a1)	13	10312682	10355135
LOC101478960	101478960	uncharacterized LOC101478960(LOC101478960)	13	12855157	12875314
LOC101478961	101478961	uncharacterized LOC101478961(si:ch211-198a12.6)	13	16093596	16100313
LOC101479239	101479239	zinc finger, CCHC domain containing 24(zcchc24)	13	14983119	15023598
LOC101479254	101479254	putative ZDHHC-type palmitoyltransferase 6(si:ch211-223a10.1)	13	17702447	17710370
LOC101479436	101479436	indoleamine 2,3-dioxygenase 2-like(LOC101479436)	13	12916176	12922705
LOC101479536	101479536	peptidylprolyl isomerase Fa(ppifa)	13	15024099	15027158
LOC101479552	101479552	leucine rich repeat containing 18a(lrrc18a)	13	17735999	17739816
LOC101479720	101479720	protein FAM196A(LOC101479720)	13	12926154	12949160
LOC101479813	101479813	atlastin-2(LOC101479813)	13	10356775	10374857
stox1	101479814	storkhead box 1(stox1)	13	16101506	16123189
ccar1	101480095	cell division cycle and apoptosis regulator 1(ccar1)	13	16136730	16154212
LOC101480193	101480193	uncharacterized LOC101480193(LOC101480193)	13	15028238	15035165
LOC101480209	101480209	V-set and transmembrane domain containing 4a(vstm4a)	13	17751973	17760631
LOC101480295	101480295	receptor-type tyrosine-protein phosphatase epsilon(LOC101480295)	13	13003172	13028885
LOC101480388	101480388	uncharacterized LOC101480388(zgc:110319)	13	16155069	16159130
olig3	101480485	oligodendrocyte transcription factor 3(olig3)	13	10429266	10430400
LOC101480579	101480579	gonadotropin-releasing hormone 3(gnrh3)	13	13029154	13030251
LOC101480683	101480683	zinc finger, MIZ-type containing 1a(zmiz1a)	13	15036454	15147418
LOC101480684	101480684	uncharacterized LOC101480684(si:dkey-228d14.5)	13	16160746	16166166
LOC101480699	101480699	dorsal root ganglia homeobox(drgx)	13	17780427	17785692
LOC101480770	101480770	uncharacterized LOC101480770(si:ch73-52p7.1)	13	10452269	10463501
mgmt	101480876	O-6-methylguanine-DNA methyltransferase(mgmt)	13	13093297	13111847
LOC101480970	101480970	eukaryotic translation initiation factor 4E family member 1c(eif4e1c)	13	16166741	16177252
ercc6	101480982	excision repair cross-complementation group 6(ercc6)	13	17787215	17801013
ifngr1l	101481044	interferon gamma receptor 1-like(ifngr1l)	13	10467663	10487458
slc25a16	101481266	solute carrier family 25 member 16(slc25a16)	13	16222118	16227432
LOC101481349	101481349	interleukin 22 receptor, alpha 2(il22ra2)	13	10490917	10496891
LOC101481351	101481351	early B cell factor 3(LOC101481351)	13	13119860	13187731
LOC101481549	101481549	tet methylcytosine dioxygenase 1(tet1)	13	16180337	16221677
LOC101481641	101481641	mitogen-activated protein kinase kinase kinase 21(map3k21)	13	10497704	10527167
LOC101481660	101481660	chemokine (C-X-C motif) ligand 12a (stromal cell-derived factor 1)(cxcl12a)	13	17829165	17835187
LOC101481949	101481949	protein DEPP(LOC101481949)	13	17886658	17887808
pcnx2	101482127	pecanex 2(pcnx2)	13	10527705	10566334
rps24	101482129	ribosomal protein S24(rps24)	13	15188267	15192901
LOC101482230	101482230	uncharacterized LOC101482230(LOC101482230)	13	13187858	13194420
LOC101482243	101482243	uncharacterized LOC101482243(LOC101482243)	13	17873551	17874892
LOC101482424	101482424	regulator of G protein signaling 17(rgs17)	13	10576793	10596928
bnip3	101482425	BCL2 interacting protein 4(bnip4)	13	13205919	13209552
alox5	101482427	arachidonate 5-lipoxygenase a(alox5a)	13	16231297	16243550
tmem72	101482536	transmembrane protein 72(tmem72)	13	17863260	17867713
ppp2r2d	101482706	protein phosphatase 2, regulatory subunit B, delta(ppp2r2d)	13	13199706	13205769
2022-03-08	101482709	membrane-associated ring finger (C3HC4) 8(march8)	13	16243619	16337528
LOC101482825	101482825	peroxisomal N(1)-acetyl-spermine/spermidine oxidase(LOC101482825)	13	17900558	17909041
LOC101482911	101482911	opioid receptor, mu 1(oprm1)	13	10693170	10745003
LOC101483007	101483007	alpha-2A adrenergic receptor(LOC101483007)	13	13214002	13218810
eif4ebp2	101483084	eukaryotic translation initiation factor 4E binding protein 2(eif4ebp2)	13	15195140	15198885
LOC101483098	101483098	peroxisomal N(1)-acetyl-spermine/spermidine oxidase(LOC101483098)	13	17909912	17919888
LOC101483369	101483369	inorganic pyrophosphatase 1b(ppa1b)	13	15201228	15206770
smndc1	101483474	survival motor neuron domain containing 1(smndc1)	13	13239873	13245703
LOC101483562	101483562	splicing factor 3B subunit 5(LOC101483562)	13	10777554	10779883
LOC101483674	101483674	secretion associated, Ras related GTPase 1Ab(sar1ab)	13	15207985	15213098
mtg1	101483691	mitochondrial ribosome-associated GTPase 1(mtg1)	13	17926339	17932764
LOC101483773	101483773	max-interacting protein 1(LOC101483773)	13	13246004	13253725
zfand4	101483775	zinc finger, AN1-type domain 4(zfand4)	13	16342183	16357333
LOC101483871	101483871	pleckstrin homology domain-containing family A member 1(LOC101483871)	13	10834441	10855391
LOC101484045	101484045	adducin 3 (gamma) b(add3b)	13	13258433	13284397
LOC101484062	101484062	polymeric immunoglobulin receptor-like(LOC101484062)	13	14374834	14379064
tysnd1	101484130	trypsin like peroxisomal matrix peptidase 1(tysnd1)	13	15213750	15217007
fuom	101484422	fucose mutarotase(fuom)	13	17944626	17946312
LOC101484505	101484505	sortilin related VPS10 domain containing receptor 3b(sorcs3b)	13	13358674	13420542
LOC101484782	101484782	E3 ubiquitin-protein ligase NEURL1(LOC101484782)	13	13500075	13536962
washc2c	101484783	WASH complex subunit 2C(washc2c)	13	16357888	16368773
LOC101484981	101484981	serine protease HTRA1A(LOC101484981)	13	10858107	10888136
LOC101484982	101484982	SPARC (osteonectin), cwcv and kazal like domains proteoglycan 2(spock2)	13	15221975	15259748
sh3pxd2a	101485065	SH3 and PX domains 2A(sh3pxd2a)	13	13540526	13609921
LOC101485066	101485066	SMC5-SMC6 complex localization factor 2(slf2)	13	16371207	16387724
LOC101485085	101485085	muscle segment homeobox 3(msx3)	13	17965959	17968506
sfrp5	101485087	secreted frizzled-related protein 5(sfrp5)	13	16597791	16611867
znf511	101485368	zinc finger protein 511(znf511)	13	17968808	17971917
crtac1	101485369	cartilage acidic protein 1b(crtac1b)	13	16663723	16683331
LOC101485449	101485449	WAPL cohesin release factor a(wapla)	13	10891125	10917459
LOC101485451	101485451	DNA damage-inducible transcript 4 protein(LOC101485451)	13	15269256	15270576
slk	101485539	STE20-like kinase a(slka)	13	13612892	13634058
ankrd2	101485644	ankyrin repeat domain 2(ankrd2)	13	16888908	16891436
trmt2b	101485730	tRNA methyltransferase 2 homolog B(trmt2b)	13	15280347	15283336
LOC101485731	101485731	phosphoglycerate mutase 1(LOC101485731)	13	16390653	16395711
spef1	101485829	sperm flagellar 1(spef1)	13	17987805	17991134
LOC101485900	101485900	uncharacterized LOC101485900(LOC101485900)	13	10932221	10966598
LOC101485916	101485916	canalicular multispecific organic anion transporter 1(LOC101485916)	13	17035223	17066493
marveld1	101486015	MARVEL domain containing 1(marveld1)	13	16401611	16403652
golga7b	101486135	golgin A7 family, member Bb(golga7bb)	13	16636407	16655730
LOC101486136	101486136	ADAM metallopeptidase domain 8a(adam8a)	13	17977789	17986675
grid1	101486211	glutamate receptor, ionotropic, delta 1a(grid1a)	13	11019933	11303334
LOC101486226	101486226	prominin 2(prom2)	13	17440376	17452049
LOC101486312	101486312	DnaJ heat shock protein family (Hsp40) member B12a(dnajb12a)	13	15273259	15280230
avpi1	101486313	arginine vasopressin induced 1(avpi1)	13	16403895	16406524
LOC101486407	101486407	glutathione S-transferase omega-1(LOC101486407)	13	13679802	13684067
LOC101486424	101486424	lysyl oxidase-like 4(loxl4)	13	16698032	16720877
LOC101486425	101486425	ER lipid raft associated 1(erlin1)	13	17995520	18004716
wdfy4	101486520	WDFY family member 4(wdfy4)	13	17711185	17749551
LOC101486602	101486602	wingless-type MMTV integration site family, member 8b(wnt8b)	13	15289886	15294687
LOC101486603	101486603	zinc finger protein(zgc:171482)	13	16479685	16567626
LOC101486804	101486804	uncharacterized LOC101486804(zgc:123010)	13	16726546	16734030
LOC101486877	101486877	SPARC(LOC101486877)	13	11480544	11488798
sfr1	101486878	SWI5-dependent homologous recombination repair protein 1(sfr1)	13	13661859	13663168
hif1an	101486879	hypoxia inducible factor 1 subunit alpha inhibitor(hif1an)	13	15300467	15314565
LOC101487089	101487089	inhibitor of nuclear factor kappa-B kinase subunit alpha(LOC101487089)	13	18008520	18018445
rassf4	101487090	Ras association domain family member 4a(rassf4a)	13	17869621	17897809
LOC101487166	101487166	neuron-derived neurotrophic factor , like(ndnfl)	13	11493833	11505628
LOC101487361	101487361	glutathione S-transferase omega-1(LOC101487361)	13	13686979	13689776
cuedc2	101487362	CUE domain containing 2(cuedc2)	13	15314669	15319260
LOC101487363	101487363	phosphatase and actin regulator 2(phactr2)	13	10791765	10832889
plau	101487380	plasminogen activator, urokinase a(plaua)	13	18023207	18026639
echs1	101487381	enoyl CoA hydratase, short chain, 1, mitochondrial(echs1)	13	17937660	17941589
dnajc9	101487462	DnaJ (Hsp40) homolog, subfamily C, member 9(dnajc9)	13	11509588	11514162
LOC101487473	101487473	zinc finger CCCH domain-containing protein 13-like(LOC101487473)	13	17761638	17774431
pyroxd2	101487478	pyridine nucleotide-disulphide oxidoreductase domain 2(pyroxd2)	13	16736529	16748896
LOC101487645	101487645	glutathione S-transferase omega-1(LOC101487645)	13	13699122	13702853
ccser2	101487646	coiled-coil serine-rich protein 2a(ccser2a)	13	11408948	11458804
LOC101487661	101487661	vinculin(LOC101487661)	13	18030277	18054197
LOC101487663	101487663	dual specificity protein phosphatase 13(LOC101487663)	13	18087126	18089964
fam149b1	101487750	family with sequence similarity 149 member B1(fam149b1)	13	11514175	11525436
slc25a28	101487766	solute carrier family 25 member 28(slc25a28)	13	16753196	16759202
itprip	101487932	inositol 1,4,5-trisphosphate receptor interacting protein(itprip)	13	13702961	13709125
LOC101487934	101487934	formin-2(LOC101487934)	13	11776089	11816244
LOC101487952	101487952	glutathione S-transferase A4-like(LOC101487952)	13	18189656	18191380
LOC101488020	101488020	uncharacterized LOC101488020(si:ch211-248a14.8)	13	11532094	11538359
LOC101488036	101488036	NK3 homeobox 3(nkx3.3)	13	16777562	16779834
LOC105940911	105940911	uncharacterized LOC105940911(LOC105940911)	13	10740331	10742553
LOC105940913	105940913	uncharacterized LOC105940913(LOC105940913)	13	12191811	12193501
LOC105940915	105940915	N-acetyllactosaminide beta-1,3-N-acetylglucosaminyltransferase 3-like(LOC105940915)	13	13604284	13608342
LOC105941012	105941012	dual specificity phosphatase DUPD1(LOC105941012)	13	18084428	18086684
LOC105941015	105941015	uncharacterized LOC105941015(LOC105941015)	13	18157017	18157390
LOC106675079	106675079	G2/M phase-specific E3 ubiquitin-protein ligase(LOC106675079)	13	14176806	14183612
LOC106675124	106675124	uncharacterized LOC106675124(LOC106675124)	13	16009505	16016313
LOC106675127	106675127	canalicular multispecific organic anion transporter 1-like(LOC106675127)	13	17070085	17102986
LOC106675420	106675420	zinc finger BED domain-containing protein 4-like(LOC106675420)	13	16486605	16487473
LOC106675460	106675460	uncharacterized LOC106675460(LOC106675460)	13	10927444	10932053
LOC111500711	111500711	small nucleolar RNA SNORA50(LOC111500711)	13	17488045	17488184
trnai-uau	111500712	transfer RNA isoleucine (anticodon UAU)(trnai-uau)	13	17034313	17034406
LOC111500868	111500868	CMRF35-like molecule 1(LOC111500868)	13	14417276	14418751
LOC111500869	111500869	uncharacterized LOC111500869(LOC111500869)	13	14436349	14441347
LOC111500870	111500870	small nucleolar RNA SNORD98(LOC111500870)	13	16147546	16147610
LOC112429735	112429735	cutC copper transporter homolog (E. coli)(cutc)	13	17131042	17136850
LOC112430054	112430054	uncharacterized LOC112430054(LOC112430054)	13	15618185	15619601
LOC112435737	112435737	uncharacterized LOC112435737(LOC112435737)	13	11346882	11347777
LOC112435743	112435743	uncharacterized protein K02A2.6-like(LOC112435743)	13	12282721	12287028
LOC112435744	112435744	uncharacterized LOC112435744(LOC112435744)	13	14420021	14434221
LOC112435745	112435745	canalicular multispecific organic anion transporter 1-like(LOC112435745)	13	17154851	17176580
LOC112435761	112435761	splicing factor 3B subunit 5-like(LOC112435761)	13	10765054	10766874
LOC112435763	112435763	canalicular multispecific organic anion transporter 1-like(LOC112435763)	13	17177781	17208047
LOC112435764	112435764	canalicular multispecific organic anion transporter 1-like(LOC112435764)	13	17145595	17148366
LOC112435765	112435765	cytochrome c oxidase assembly protein COX15 homolog(LOC112435765)	13	17137165	17142763
LOC112435773	112435773	uncharacterized LOC112435773(LOC112435773)	13	15616473	15618757
LOC112435776	112435776	uncharacterized LOC112435776(LOC112435776)	13	13737888	13738452

## Sheet: PC2 lateral LG2 NC_036781.1
NC_036781.1:27837082-30863362
NCBI Gene symbol	NCBI Gene ID	DAVID Gene Name	Chromosome #	START	STOP
LOC101463801	101463801	E74-like ETS transcription factor 1(elf1)	2	30041766	30082848
fgf13	101464105	fibroblast growth factor 13a(fgf13a)	2	28793436	28892502
zic3	101464958	zic family member 3 heterotaxy 1 (odd-paired homolog, Drosophila)(zic3)	2	29023315	29028481
LOC101465244	101465244	zic family member 6(zic6)	2	29010542	29016073
pcdh19	101465245	protocadherin 19(pcdh19)	2	30302639	30355181
gpr101	101465828	G protein-coupled receptor 101(gpr101)	2	29086527	29090865
LOC101466107	101466107	transforming growth factor, beta 5(tgfb5)	2	27830139	27840896
tm9sf2	101466108	transmembrane 9 superfamily member 2(tm9sf2)	2	29090968	29103133
LOC101466413	101466413	potassium channel, subfamily K, member 4a(kcnk4a)	2	27847968	27859921
rbmx	101466592	RNA binding motif protein X-linked(rbmx)	2	29108130	29113828
LOC101466694	101466694	centromere protein F(si:dkeyp-115e12.6)	2	27863192	27886986
LOC101467059	101467059	CD40 ligand(cd40lg)	2	29142685	29144141
stx5	101467160	syntaxin 5A(stx5a)	2	27893227	27900176
arhgef6	101467349	Rac/Cdc42 guanine nucleotide exchange factor (GEF) 6(arhgef6)	2	29114279	29141379
LOC101467665	101467665	RD3 domain-containing protein(zgc:162144)	2	27889622	27893140
vegfb	101467969	vascular endothelial growth factor Ba(vegfba)	2	27907756	27928046
LOC101468053	101468053	adhesion G protein-coupled receptor G4a(adgrg4a)	2	29160684	29172716
dnajc4	101468641	DnaJ (Hsp40) homolog, subfamily C, member 4(dnajc4)	2	27928912	27937442
LOC101468763	101468763	MAP7 domain containing 3(map7d3)	2	29180822	29209353
LOC101469157	101469157	heterogeneous nuclear ribonucleoprotein U-like protein 2(si:ch211-107m4.1)	2	27962727	27967675
nudt22	101469445	nudix (nucleoside diphosphate linked moiety X)-type motif 22(nudt22)	2	27958045	27962844
LOC101469708	101469708	Transmembrane protein 179-like(zgc:153018)	2	27969181	27976075
LOC101469904	101469904	sestrin 4(sesn4)	2	28074473	28086044
LOC101469993	101469993	heparan sulfate 6-O-sulfotransferase 2(hs6st2)	2	27997716	28002448
LOC101470195	101470195	atlastin 3(atl3)	2	28163080	28176558
LOC101470482	101470482	muscleblind-like splicing regulator 3(mbnl3)	2	28004935	28040457
LOC101470485	101470485	uncharacterized LOC101470485(si:rp71-46j2.7)	2	28329341	28347186
LOC101470780	101470780	RAP2C, member of RAS oncogene family(rap2c)	2	28042542	28050829
fhl1	101470974	four and a half LIM domains 1a(fhl1a)	2	29209401	29222242
alg13	101471051	ALG13 UDP-N-acetylglucosaminyltransferase subunit(zgc:92907)	2	28057367	28065116
LOC101471053	101471053	teleost multiple tissue opsin 3a(tmtops3a)	2	29146178	29151531
LOC101471337	101471337	forkhead box O4(foxo4)	2	28088009	28097070
drp2	101471637	dystrophin related protein 2(drp2)	2	29267995	29443755
LOC101471831	101471831	solute carrier family 9 member A6a(slc9a6a)	2	29224087	29241360
tspan6	101471933	tetraspanin 7(tspan7)	2	29572486	29582474
LOC101472018	101472018	ubiquitin-like 3b(ubl3b)	2	28107036	28118550
LOC101472305	101472305	serine protease 23(LOC101472305)	2	28144354	28149713
taf7l	101472307	TAF7 RNA polymerase II, TATA box binding protein (TBP)-associated factor(taf7)	2	29241786	29251729
tnmd	101472516	tenomodulin(tnmd)	2	30088390	30155137
LOC101472616	101472616	uncharacterized LOC101472616(LOC101472616)	2	29255745	29267894
diaph2	101472795	diaphanous-related formin 2(diaph2)	2	30503316	30866559
cfl1	101473000	cofilin 1(cfl1)	2	28151752	28159980
cenpi	101473090	centromere protein I(cenpi)	2	29445158	29461558
LOC101473114	101473114	uncharacterized LOC101473114(LOC101473114)	2	27948647	27954001
LOC101473300	101473300	forkhead box protein N2(si:ch211-145o7.3)	2	28179371	28183098
tmem35a	101473592	transmembrane protein 35(tmem35)	2	29463672	29466215
yif1a	101473781	Yip1 interacting factor homolog A (S. cerevisiae)(yif1a)	2	28184593	28193034
xkrx	101473891	XK related X-linked(xkrx)	2	29479969	29491989
arl13a	101474185	ADP-ribosylation factor-like 13A(arl13a)	2	29468996	29479501
fosl1	101474460	FOS like 1, AP-1 transcription factor subunit a(fosl1a)	2	28200243	28203578
nox1	101474828	NADPH oxidase 1(nox1)	2	29492169	29500765
ccdc85b	101474927	coiled-coil domain containing 85B(ccdc85b)	2	28205049	28207527
fibp	101475216	fibroblast growth factor (acidic) intracellular binding protein a(fibpa)	2	28210163	28216772
efemp2	101475513	EGF containing fibulin extracellular matrix protein 2a(efemp2a)	2	28218163	28229777
cstf2	101475515	cleavage stimulation factor, 3' pre-RNA, subunit 2(cstf2)	2	29500780	29516091
npas4	101475809	neuronal PAS domain protein 4a(npas4a)	2	28255948	28261964
bcorl1	101476399	BCL6 corepressor-like 1(bcorl1)	2	29516244	29550747
LOC101476505	101476505	transmembrane protein 265(tmem265)	2	28290119	28296653
mrpl11	101476964	mitochondrial ribosomal protein L11(mrpl11)	2	28265360	28327389
LOC101477438	101477438	ligand of numb-protein X 2b(lnx2b)	2	28370918	28391294
LOC101477439	101477439	MID1 interacting protein 1, like(mid1ip1l)	2	29567956	29569677
trmt12	101477717	tRNA methyltransferase 12 homolog(trmt12)	2	29624038	29627494
LOC101478093	101478093	cysteine-rich hydrophobic domain 1(chic1)	2	28393624	28399879
sytl4	101478175	synaptotagmin-like 4(sytl4)	2	29600688	29622228
cdx4	101478459	caudal type homeobox 4(cdx4)	2	28401314	28404419
LOC101478748	101478748	kinase insert domain receptor like(kdrl)	2	28416794	28459737
srpx2	101478836	sushi-repeat containing protein X-linked 2(srpx2)	2	29585478	29600888
dlg3	101479027	discs, large homolog 3 (Drosophila)(dlg3)	2	28477072	28558390
zdhhc9	101479116	zinc finger DHHC-type palmitoyltransferase 9(zdhhc9)	2	29631101	29659408
sash3	101479399	SAM and SH3 domain containing 3(sash3)	2	29663599	29672079
xpnpep2	101479687	X-prolyl aminopeptidase (aminopeptidase P) 2, membrane-bound(xpnpep2)	2	29678829	29699150
apln	101479970	apelin(apln)	2	29768160	29790294
LOC101480269	101480269	vimentin-related 2(vimr2)	2	29821842	29844745
LOC101480559	101480559	protein eva-1 homolog C(si:ch73-335m24.2)	2	29867328	29875168
tex11	101480847	testis expressed 11(tex11)	2	28465335	28477069
ocrl	101480849	OCRL inositol polyphosphate-5-phosphatase(ocrl)	2	29844975	29865435
LOC101481614	101481614	chloride intracellular channel 2(clic2)	2	29880203	29885476
LOC101481713	101481713	glycerophosphodiester phosphodiesterase domain containing 2(gdpd2)	2	28559807	28570003
c1galt1c1	101481901	C1GALT1-specific chaperone 1(c1galt1c1)	2	29895216	29898177
pdzd11	101482201	PDZ domain containing 11(pdzd11)	2	28575547	28582831
mcts1	101482202	MCTS1 re-initiation and release factor(mcts1)	2	29901573	29904921
cul4b	101482497	cullin 4B(cul4b)	2	29906833	29923609
LOC101482673	101482673	START domain containing 14(stard14)	2	28583191	28586965
lamp2	101482780	lysosomal-associated membrane protein 2(lamp2)	2	29925088	29937444
LOC101482981	101482981	RAB41, member RAS oncogene family(rab41)	2	28588550	28596888
atp1b4	101483268	ATPase Na+/K+ transporting subunit beta 4(atp1b4)	2	29940684	29946586
tmem255a	101484113	transmembrane protein 255A(tmem255a)	2	29950077	29968560
LOC101484383	101484383	arrestin 3b, retinal (X-arrestin)(arr3b)	2	28598331	28604732
zbtb33	101484384	zinc finger and BTB domain containing 33(zbtb33)	2	29970286	29976110
p2ry4	101484656	pyrimidinergic receptor P2Y4(p2ry4)	2	28632217	28635511
nkap	101484849	NFKB activating protein(nkap)	2	29977059	29980400
LOC101484941	101484941	inositol polyphosphate phosphatase-like 1b(inppl1b)	2	28609999	28627569
ndufa1	101485144	NADH:ubiquinone oxidoreductase subunit A1(ndufa1)	2	29982260	29983467
LOC101485414	101485414	SRY-box transcription factor 3(sox3)	2	28653621	28655628
upf3b	101485607	UPF3B regulator of nonsense mediated mRNA decay(upf3b)	2	29984015	29988466
atp11c	101485693	ATPase phospholipid transporting 11C(atp11c)	2	28707355	28748684
sowahd	101485877	sosondowah ankyrin repeat domain family d(sowahd)	2	29997173	29999337
rpl39	101486186	ribosomal protein L39(rpl39)	2	29992815	29997071
pttg1	101486479	PTTG1 regulator of sister chromatid separation, securin(pttg1)	2	29999341	30004786
sept6_	101486949	septin 6(sept6)	2	30006852	30025060
LOC101487720	101487720	coagulation factor IXa(f9a)	2	28770926	28776626
nkrf	101487811	NFKB repressing factor(nkrf)	2	30030142	30037214
mcf2	101488000	MCF.2 cell line derived transforming sequence a(mcf2a)	2	28749667	28770822
ube2a	101488085	ubiquitin-conjugating enzyme E2A (RAD6 homolog)(ube2a)	2	30037271	30040842
LOC105940786	105940786	vestigial like family member 1(vgll1)	2	29156997	29160596
slc25a43	106676294	solute carrier family 25 member 43(slc25a43)	2	28353980	28360278
LOC106676295	106676295	solute carrier family 25 member 5(slc25a5)	2	28351412	28353875
LOC111501408	111501408	small nucleolar RNA SNORA69(LOC111501408)	2	29995533	29995667
trnae-uuc	111501415	transfer RNA glutamic acid (anticodon UUC)(trnae-uuc)	2	30041479	30041550
trnaf-gaa	111501416	transfer RNA phenylalanine (anticodon GAA)(trnaf-gaa)	2	27991417	27991489
trnav-uac	111501420	transfer RNA valine (anticodon UAC)(trnav-uac)	2	29520014	29520086
trnak-cuu	111501423	transfer RNA lysine (anticodon CUU)(trnak-cuu)	2	28230774	28230846
trnaf-gaa	111501424	transfer RNA phenylalanine (anticodon GAA)(trnaf-gaa)	2	27993665	27993737
trnaf-gaa	111501425	transfer RNA phenylalanine (anticodon GAA)(trnaf-gaa)	2	27992280	27992352
LOC112436110	112436110	uncharacterized LOC112436110(LOC112436110)	2	30361590	30362195
LOC112436168	112436168	protein NYNRIN-like(LOC112436168)	2	27980694	27984406
LOC112436366	112436366	myosin-11-like(LOC112436366)	2	27937849	27939786

[truncated: 13 more sheets: PC2 lateral LG6 NC_036785.1, PC2 lateral LG7 NC_036786.1, PC2 lateral LG10 NC_036789.1, PC2 lateral LG23 NC_036801.1, PC3 lateral LG17 NC_036796.1, PC3 lateral LG20 NC_036799.1, PC3 lateral LG22 NC_036800.1, PC4 lateral LG12 NC_036791.1, PC4 lateral LG23 NC_036801.1, OpercleMid wid LG6 NC_036785.1, OpercleMid wid LG15 NC_036794.1, OperMand len LG6 NC_036785.1, Mandible Angle LG16 NC_036795.1]
