# Supplementary material for: Morphometric and Genetic Description of Trophic Adaptations in Cichlid Fishes
Source: Biology (Basel). 2022 Aug 3;11(8):1165. doi: 10.3390/biology11081165 (PMC9405370; doi:10.3390/biology11081165)
Supplement: Supplementary file 1 [file biology-11-01165-s001.zip › DeLorenzo Table S5 GO analysis_revised.xlsx]

## Sheet: GO analysis of QTL intervals
Phenotype	Enriched Term	PValue	Fold Enrichment	Count	Genes in region (NCBI Gene ID)	Gene Name
All lateral QTL	KW-0356~Hemostasis	0.0176629	2.4581	9	101481554, 101466796, 101483533, 101487449, 101482965, 101478639, 101467361, 101482036, 101463683	von Willebrand factor(vwf),fibrinogen beta chain(fgb),proteinase-activated receptor 1(LOC101483533),tissue factor pathway inhibitor 2(tfpi2),proteinase-activated receptor 1(LOC101482965),coagulation factor II (thrombin) receptor(f2r),fibrinogen alpha chain(fga),ectonucleotide pyrophosphatase/phosphodiesterase 4(enpp4),coagulation factor II (thrombin)(f2)
All lateral QTL	KW-0237~DNA synthesis	0.0178868	4.09684	5	101474836, 101470115, 101471183, 101481221, 101478772	polymerase (DNA directed), beta(polb);REV1 DNA directed polymerase(rev1);polymerase (DNA directed), eta(polh);polymerase (DNA directed) kappa(polk);polymerase (DNA directed) iota(poli)
All lateral QTL	KW-0094~Blood coagulation	0.0194666	2.62198	8	101481554, 101466796, 101483533, 101482965, 101478639, 101467361, 101482036, 101463683	von Willebrand factor(vwf),fibrinogen beta chain(fgb),proteinase-activated receptor 1(LOC101483533), proteinase-activated receptor 1(LOC101482965),coagulation factor II (thrombin) receptor(f2r),fibrinogen alpha chain, ectonucleotide pyrophosphatase/phosphodiesterase 4(enpp4);coagulation factor II (thrombin)(f2)
All ventral QTL	KW-0552~Olfaction	7.65467e-05	5.34396	10	101464088, 101464397, 101485228, 101486932, 105941456, 106675409, 101485784, 101479197, 101484368, 101487245	olfactory receptor 13C2-like(LOC101464088),olfactory receptor 6N2-like(LOC101464397),olfactory receptor 51E1-like(LOC101485228),olfactory receptor 2M3-like(LOC101486932),olfactory receptor 6N2-like(LOC105941456),olfactory receptor 6N2-like(LOC106675409)
All ventral QTL	KW-0716~Sensory transduction	0.000316554	3.70221	12	101464088, 101464397, 101484935, 101485228, 101486932, 105941456, 106675409, 101484651, 101485784, 101479197, 101484368, 101487245	olfactory receptor 13C2-like(LOC101464088),olfactory receptor 6N2-like(LOC101464397),retinal cone rhodopsin-sensitive cGMP 3',5'-cyclic phosphodiesterase subunit gamma(LOC101484935),olfactory receptor 51E1-like(LOC101485228),olfactory receptor 2M3-like(LOC101486932),olfactory receptor 6N2-like(LOC105941456),olfactory receptor 6N2-like(LOC106675409),retinal cone rhodopsin-sensitive cGMP 3',5'-cycl…
Head Proportion (LG20)	KW-0633~Potassium transport	0.0178658	2.93355	8	101478378, 101486708, 101486042, 101470631, 101480804, 101486775, 101485468, 101469905	potassium channel, subfamily K, member 15(kcnk15), potassium voltage-gated channel, Shaw-related subfamily, member 4(kcnc4),potassium voltage-gated channel subfamily A member 3(LOC101486042),potassium voltage-gated channel, Shal-related subfamily, member 3(kcnd3),potassium voltage-gated channel subfamily KQT member 2(LOC101486775),voltage-gated channel, subfamily G, member 1(kcng1),potassium volt…
Head Proportion (LG20)	KW-0804~Transcription	0.0460752	1.3953	30	101484072, 101473974, 101473579, 101470380, 101472261, 101471491, 101477158, 101474461, 101482678, 101476262, 101475151, 101478974, 101478139, 101483800, 101469865, 101470437, 101464056, 101473787, 101470732, 101471388, 101472851, 101471784, 101474312, 101473441, 101470151, 101478420, 101485999, 101481031, 101482461, 101487278	ETS variant transcription factor 7(etv7),interferon regulatory factor 10(irf10),activity-dependent neuroprotector homeobox b(adnpb),bromodomain adjacent to zinc finger domain, 2A(baz2a),TATA-box binding protein associated factor 4(taf4),homeobox C5a(hoxc5a),homeobox C8a(hoxc8a),ataxin-1-like(zmp:0000000926),DNA primase subunit 1(prim1),homeobox C1a(hoxc1a),histone deacetylase 7a(hdac7a),L3MBTL hi…
Dorsal fin to pelvic fin length (LG7+LG20)	KW-0633~Potassium transport	0.0178658	2.93355	8	101486708, 101486042, 101467844, 101471126, 101470850, 101470631, 101485468, 101486700	potassium voltage-gated channel, Shaw-related subfamily, member 4(kcnc4),potassium voltage-gated channel subfamily A member 3(LOC101486042),potassium voltage-gated channel, shaker-related subfamily, member 1a(kcna1a),potassium voltage-gated channel subfamily D member 2(LOC101467844),shaker-related potassium channel tsha2(LOC101470850),potassium voltage-gated channel, Shal-related subfamily, membe…
Pelvic fin to snout length (LG12)	KW-0237~DNA synthesis	0.00732021	21.6456	3	101474836, 101481221, 101478772	polymerase (DNA directed), beta(polb),polymerase (DNA directed) kappa(polk),polymerase (DNA directed) iota(poli)
Pelvic fin to snout length (LG12)	KW-0831~Ubiquinone biosynthesis	0.00732021	21.6456	3	105940566, 112435655, 112435654	4-hydroxybenzoate polyprenyltransferase, mitochondrial(LOC105940566),4-hydroxybenzoate polyprenyltransferase, mitochondrial-like(LOC112435655),4-hydroxybenzoate polyprenyltransferase, mitochondrial-like(LOC112435654)
Pelvic fin to snout length (LG12)	KW-0414~Isoprene biosynthesis	0.0132618	16.2342	3	105940566, 112435655, 112435654	4-hydroxybenzoate polyprenyltransferase, mitochondrial(LOC105940566),4-hydroxybenzoate polyprenyltransferase, mitochondrial-like(LOC112435655),4-hydroxybenzoate polyprenyltransferase, mitochondrial-like(LOC112435654)
Pelvic fin to snout length (LG12)	KW-0235~DNA replication	0.0206285	6.66019	4	101474836, 101478843, 101481221, 101477333	polymerase (DNA directed), beta(polb),CDC45 cell division cycle 45 homolog (S. cerevisiae)(cdc45),polymerase (DNA directed) kappa(polk),polymerase (DNA directed), epsilon(pole)
Preorbital length (LG7+ LG17)	none significant
Eye area (LG15+LG16-21)	KW-0552~Olfaction	1.24627e-06	6.54452	12	101464088, 101464397, 101485228, 101486932, 105941456, 101478317, 106675409, 101485784, 101479197, 101484368, 101474024, 101487245	olfactory receptor 13C2-like(LOC101464088),olfactory receptor 6N2-like(LOC101464397),olfactory receptor 51E1-like(LOC101485228),olfactory receptor 2M3-like(LOC101486932),olfactory receptor 6N2-like(LOC105941456),olfactory receptor 6N2-like(LOC106675409),olfactory receptor 11A1-like(LOC101478317),olfactory receptor 13C2-like(LOC101485784),olfactory receptor 11A1-like(LOC101484368),olfactory recept…
Eye area (LG15+LG16-21)	KW-0716~Sensory transduction	5.85674e-05	4.09314	13	101464088, 101464397, 105941456, 106675409, 101479197, 101474024, 101476052, 101485228, 101486932, 101478317, 101485784, 101484368, 101487245	olfactory receptor 13C2-like(LOC101464088),olfactory receptor 6N2-like(LOC101464397),olfactory receptor 6N2-like(LOC105941456),olfactory receptor 6N2-like(LOC106675409),olfactory receptor 6N2-like(LOC101479197),odorant receptor, family 64, subfamily A, member 1(or64a1),myosin IIIB(myo3b),olfactory receptor 51E1-like(LOC101485228),olfactory receptor 2M3-like(LOC101486932),olfactory receptor 11A1-l…
Mouth angle (LG13)	KW-0879~Wnt signaling pathway	0.0460964	8.49333	3	101485087, 101475651, 101476430	zinc finger, RAN-binding domain containing 1b(zranb1b),secreted frizzled-related protein 5(sfrp5),leucine zipper, putative tumor suppressor 2a(lzts2a)
PC2 lateral (LG2+LG6+LG7+LG10+LG23)	KW-0739~Sodium transport	0.0311317	2.89197	7	101476230, 101482621, 101484039, 101471831, 101482514, 101484790, 101467100	solute carrier family 13 member 2(slc13a2),solute carrier family 34 member 2b(slc34a2b),solute carrier family 12 member 2(slc12a2),solute carrier family 9 member A6a(slc9a6a),potassium/sodium hyperpolarization-activated cyclic nucleotide-gated channel 1(LOC101482514),ATPase Na+/K+ transporting subunit beta 1a(atp1b1a),hyperpolarization activated cyclic nucleotide-gated potassium channel 2b(hcn2b)
PC3 lateral (LG17+LG20+LG22)	KW-0356~Hemostasis	0.036777	9.65152	3	101466796, 101487449, 101467361	fibrinogen beta chain(fgb),tissue factor pathway inhibitor 2(tfpi2),fibrinogen alpha chain(fga)
PC3 lateral (LG17+LG20+LG22)	KW-0053~Apoptosis	0.0430893	3.71212	5	101480652, 101471388, 101487656, 101479156, 101486992	engulfment and cell motility 1 (ced-12 homolog, C. elegans)(elmo1),tumor protein p73(tp73),DNA fragmentation factor, alpha polypeptide(dffa),tumor necrosis factor receptor superfamily member 1A(si:ch211-112c15.8),DNA fragmentation factor, beta polypeptide (caspase-activated DNase)(dffb)
PC4 lateral (LG12+LG23)	KW-0769~Symport	0.0150055	3.43189	7	101484390, 101486609, 101471840, 101472414, 101470980, 101472114, 101475156	solute carrier family 15 member 1b(slc15a1b),sodium- and chloride-dependent GABA transporter 2(LOC101486609),sodium-dependent neutral amino acid transporter B(0)AT1(LOC101471840),sodium-dependent neutral amino acid transporter B(0)AT1(LOC101472414),solute carrier family 6 member 18(slc6a18),sodium-dependent neutral amino acid transporter B(0)AT1(LOC101472114),solute carrier family 1 member 7b(slc…
PC4 lateral (LG12+LG23)	KW-0633~Potassium transport	0.0246721	3.07063	7	101476791, 101477629, 101482208, 101477070, 101473367, 101477348, 101476311	sodium/potassium-transporting ATPase subunit alpha-1(LOC101476791),sodium/potassium-transporting ATPase subunit alpha-1(LOC101477629),potassium channel, voltage gated eag related subfamily H, member 7(kcnh7),sodium/potassium-transporting ATPase subunit alpha-1(LOC101477070),ATPase Na+/K+ transporting subunit beta 1b(atp1b1b),sodium/potassium-transporting ATPase subunit alpha-1(LOC101477348),sodiu…
Opercle to midline width (LG6+LG15)	none significant
Opercle to mandible length (LG6)	none significant
Mandible angle (LG16-21)	KW-0552~Olfaction	2.26e-08	13.7284	10	101464088, 101464397, 101485228, 101486932, 105941456, 106675409, 101485784, 101479197, 101484368, 101487245	olfactory receptor 13C2-like(LOC101464088),olfactory receptor 6N2-like(LOC101464397),olfactory receptor 51E1-like(LOC101485228),olfactory receptor 2M3-like(LOC101486932),olfactory receptor 6N2-like(LOC105941456),olfactory receptor 6N2-like(LOC106675409),olfactory receptor 13C2-like(LOC101485784),olfactory receptor 11A1-like(LOC101484368),olfactory receptor 6N2-like(LOC101479197),olfactory recepto…
Mandible angle (LG16-21)	KW-0716~Sensory transduction	2.85e-06	7.9257	10	101464088, 101464397, 101485228, 101486932, 105941456, 106675409, 101485784, 101479197, 101484368, 101487245	olfactory receptor 13C2-like(LOC101464088),olfactory receptor 6N2-like(LOC101464397),olfactory receptor 51E1-like(LOC101485228),olfactory receptor 2M3-like(LOC101486932),olfactory receptor 6N2-like(LOC105941456),olfactory receptor 6N2-like(LOC106675409),olfactory receptor 13C2-like(LOC101485784),olfactory receptor 11A1-like(LOC101484368),olfactory receptor 6N2-like(LOC101479197),olfactory recepto…
